# Supplementary material
Source: MDPI journal article supplement (https://www.mdpi.com/2073-4352/11/2/185)

# checkCIF/PLATON report

Structure factors have been supplied for datablock(s) arn039\_150k

THIS REPORT IS FOR GUIDANCE ONLY. IF USED AS PART OF A REVIEW PROCEDURE FOR PUBLICATION, IT SHOULD NOT REPLACE THE EXPERTISE OF AN EXPERIENCED CRYSTALLOGRAPHIC REFEREE.

No syntax errors found.      CIF dictionary      Interpreting this report

## Datablock: arn039\_150k

---

Bond precision:    C-C = 0.0037 Å

Wavelength=1.34143

Cell:                a=11.4728(3)                b=14.2115(4)                c=16.0992(4)  
                      alpha=92.018(2)        beta=91.054(2)        gamma=112.546(2)  
Temperature:        150 K

|                | Calculated                                  | Reported                                   |
|----------------|---------------------------------------------|--------------------------------------------|
| Volume         | 2421.34(12)                                 | 2421.34(12)                                |
| Space group    | P -1                                        | P -1                                       |
| Hall group     | -P 1                                        | -P 1                                       |
| Moiety formula | 2(C54 H40 Cu N2 O P2),<br>2(F6 P), C4 H10 O | C54 H40 Cu N2 O P2, F6 P,<br>0.5(C4 H10 O) |
| Sum formula    | C112 H90 Cu2 F12 N4 O3 P6                   | C56 H45 Cu F6 N2 O1.50 P3                  |
| Mr             | 2080.80                                     | 1040.39                                    |
| Dx,g cm-3      | 1.427                                       | 1.427                                      |
| Z              | 1                                           | 2                                          |
| Mu (mm-1)      | 3.418                                       | 3.409                                      |
| F000           | 1070.0                                      | 1070.0                                     |
| F000'          | 1068.27                                     |                                            |
| h,k,lmax       | 14,17,20                                    | 14,17,20                                   |
| Nref           | 10306                                       | 10023                                      |
| Tmin,Tmax      | 0.479,0.541                                 | 0.406,0.517                                |
| Tmin'          | 0.435                                       |                                            |

Correction method= # Reported T Limits: Tmin=0.406 Tmax=0.517

AbsCorr = MULTI-SCAN

Data completeness= 0.973

Theta(max)= 58.164

R(reflections)= 0.0457( 9750)

wR2(reflections)= 0.1269( 10023)

S = 1.032

Npar= 625

---

The following ALERTS were generated. Each ALERT has the format

**test-name\_ALERT\_alert-type\_alert-level.**

Click on the hyperlinks for more details of the test.

### ● Alert level C

|                   |                         |                           |                                 |         |           |
|-------------------|-------------------------|---------------------------|---------------------------------|---------|-----------|
| PLAT220_ALERT_2_C | NonSolvent              | Resd 1 C                  | Ueq(max)/Ueq(min) Range         | 3.8     | Ratio     |
| PLAT241_ALERT_2_C | High                    | 'MainMol'                 | Ueq as Compared to Neighbors of | C23     | Check     |
| PLAT241_ALERT_2_C | High                    | 'MainMol'                 | Ueq as Compared to Neighbors of | C47     | Check     |
| PLAT911_ALERT_3_C | Missing                 | FCF Refl                  | Between Thmin & STh/L=          | 0.600   | 51 Report |
| PLAT918_ALERT_3_C | Reflection(s)           | with I(obs)               | much Smaller I(calc)            | .       | 9 Check   |
| PLAT927_ALERT_1_C | Reported and Calculated | wR2 Differ by             | .....                           | -0.0018 | Check     |
| PLAT939_ALERT_3_C | Large Value of Not      | (SHELXL) Weight Optimized | S                               | 14.30   | Check     |

### ● Alert level G

|                   |                                                                                    |                                           |                             |         |        |
|-------------------|------------------------------------------------------------------------------------|-------------------------------------------|-----------------------------|---------|--------|
| ABSMU01_ALERT_1_G | Calculation of _exptl_absorpt_correction_mu not performed for this radiation type. |                                           |                             |         |        |
| PLAT002_ALERT_2_G | Number of Distance or Angle                                                        | Restraints on AtSite                      |                             | 5       | Note   |
| PLAT003_ALERT_2_G | Number of Uiso or Uij                                                              | Restrained non-H Atoms ...                |                             | 5       | Report |
| PLAT042_ALERT_1_G | Calc. and Reported                                                                 | MoietyFormula Strings Differ              |                             | Please  | Check  |
| PLAT045_ALERT_1_G | Calculated and Reported                                                            | Z Differ by a Factor ...                  |                             | 0.50    | Check  |
| PLAT154_ALERT_1_G | The s.u.'s on the Cell                                                             | Angles are Equal ..(Note)                 |                             | 0.002   | Degree |
| PLAT172_ALERT_4_G | The CIF-Embedded .res                                                              | File Contains DFIX Records                |                             | 4       | Report |
| PLAT173_ALERT_4_G | The CIF-Embedded .res                                                              | File Contains DANG Records                |                             | 1       | Report |
| PLAT176_ALERT_4_G | The CIF-Embedded .res                                                              | File Contains SADI Records                |                             | 3       | Report |
| PLAT178_ALERT_4_G | The CIF-Embedded .res                                                              | File Contains SIMU Records                |                             | 1       | Report |
| PLAT187_ALERT_4_G | The CIF-Embedded .res                                                              | File Contains RIGU Records                |                             | 1       | Report |
| PLAT244_ALERT_4_G | Low                                                                                | 'Solvent' Ueq as Compared to Neighbors of |                             | P3      | Check  |
| PLAT300_ALERT_4_G | Atom Site Occupancy of O2                                                          | Constrained at                            |                             | 0.5     | Check  |
| PLAT300_ALERT_4_G | Atom Site Occupancy of C55                                                         | Constrained at                            |                             | 0.5     | Check  |
| PLAT300_ALERT_4_G | Atom Site Occupancy of C56                                                         | Constrained at                            |                             | 0.5     | Check  |
| PLAT300_ALERT_4_G | Atom Site Occupancy of C57                                                         | Constrained at                            |                             | 0.5     | Check  |
| PLAT300_ALERT_4_G | Atom Site Occupancy of C58                                                         | Constrained at                            |                             | 0.5     | Check  |
| PLAT300_ALERT_4_G | Atom Site Occupancy of H55A                                                        | Constrained at                            |                             | 0.5     | Check  |
| PLAT300_ALERT_4_G | Atom Site Occupancy of H55B                                                        | Constrained at                            |                             | 0.5     | Check  |
| PLAT300_ALERT_4_G | Atom Site Occupancy of H56A                                                        | Constrained at                            |                             | 0.5     | Check  |
| PLAT300_ALERT_4_G | Atom Site Occupancy of H56B                                                        | Constrained at                            |                             | 0.5     | Check  |
| PLAT300_ALERT_4_G | Atom Site Occupancy of H56C                                                        | Constrained at                            |                             | 0.5     | Check  |
| PLAT300_ALERT_4_G | Atom Site Occupancy of H57A                                                        | Constrained at                            |                             | 0.5     | Check  |
| PLAT300_ALERT_4_G | Atom Site Occupancy of H57B                                                        | Constrained at                            |                             | 0.5     | Check  |
| PLAT300_ALERT_4_G | Atom Site Occupancy of H58A                                                        | Constrained at                            |                             | 0.5     | Check  |
| PLAT300_ALERT_4_G | Atom Site Occupancy of H58B                                                        | Constrained at                            |                             | 0.5     | Check  |
| PLAT300_ALERT_4_G | Atom Site Occupancy of H58C                                                        | Constrained at                            |                             | 0.5     | Check  |
| PLAT302_ALERT_4_G | Anion/Solvent/Minor-Residue                                                        | Disorder (Resd 3 )                        |                             | 100%    | Note   |
| PLAT304_ALERT_4_G | Non-Integer Number of Atoms in                                                     | ..... (Resd 3 )                           |                             | 7.50    | Check  |
| PLAT413_ALERT_2_G | Short Inter XH3 .. XHn                                                             | H23 ..H58A                                |                             | 2.00    | Ang.   |
|                   |                                                                                    | -1+x,y,z =                                |                             | 1_455   | Check  |
| PLAT789_ALERT_4_G | Atoms with Negative                                                                | _atom_site_disorder_group #               |                             | 15      | Check  |
| PLAT790_ALERT_4_G | Centre of Gravity not Within                                                       | Unit Cell: Resd. #                        |                             | 2       | Note   |
|                   | F6 P                                                                               |                                           |                             |         |        |
| PLAT860_ALERT_3_G | Number of Least-Squares                                                            | Restraints .....                          |                             | 13      | Note   |
| PLAT883_ALERT_1_G | No Info/Value for                                                                  | _atom_sites_solution_primary              |                             | Please  | Do !   |
| PLAT912_ALERT_4_G | Missing # of FCF                                                                   | Reflections Above STh/L=                  | 0.600                       | 232     | Note   |
| PLAT933_ALERT_2_G | Number of OMIT                                                                     | Records in Embedded .res File ...         |                             | 6       | Note   |
| PLAT941_ALERT_3_G | Average HKL                                                                        | Measurement Multiplicity .....            |                             | 3.4     | Low    |
| PLAT978_ALERT_2_G | Number C-C Bonds with                                                              | Positive Residual Density.                |                             | 9       | Info   |
| PLAT984_ALERT_1_G | The C-f' =                                                                         | 0.0148                                    | Deviates from the B&C-Value | 0.0137  | Check  |
| PLAT984_ALERT_1_G | The Cu-f' =                                                                        | -2.9183                                   | Deviates from the B&C-Value | -2.7974 | Check  |
| PLAT984_ALERT_1_G | The F-f' =                                                                         | 0.0600                                    | Deviates from the B&C-Value | 0.0583  | Check  |
| PLAT984_ALERT_1_G | The N-f' =                                                                         | 0.0253                                    | Deviates from the B&C-Value | 0.0241  | Check  |

|                   |             |        |                             |        |       |
|-------------------|-------------|--------|-----------------------------|--------|-------|
| PLAT984_ALERT_1_G | The O-f' =  | 0.0412 | Deviates from the B&C-Value | 0.0389 | Check |
| PLAT984_ALERT_1_G | The P-f' =  | 0.2596 | Deviates from the B&C-Value | 0.2543 | Check |
| PLAT985_ALERT_1_G | The Cu-f" = | 3.6937 | Deviates from the B&C-Value | 3.6876 | Check |
| PLAT985_ALERT_1_G | The F-f" =  | 0.0411 | Deviates from the B&C-Value | 0.0400 | Check |
| PLAT985_ALERT_1_G | The P-f" =  | 0.3354 | Deviates from the B&C-Value | 0.3332 | Check |

---

0 **ALERT level A** = Most likely a serious problem - resolve or explain  
 0 **ALERT level B** = A potentially serious problem, consider carefully  
 7 **ALERT level C** = Check. Ensure it is not caused by an omission or oversight  
 47 **ALERT level G** = General information/check it is not something unexpected

15 **ALERT type 1** CIF construction/syntax error, inconsistent or missing data  
 8 **ALERT type 2** Indicator that the structure model may be wrong or deficient  
 5 **ALERT type 3** Indicator that the structure quality may be low  
 26 **ALERT type 4** Improvement, methodology, query or suggestion  
 0 **ALERT type 5** Informative message, check

---

It is advisable to attempt to resolve as many as possible of the alerts in all categories. Often the minor alerts point to easily fixed oversights, errors and omissions in your CIF or refinement strategy, so attention to these fine details can be worthwhile. In order to resolve some of the more serious problems it may be necessary to carry out additional measurements or structure refinements. However, the purpose of your study may justify the reported deviations and the more serious of these should normally be commented upon in the discussion or experimental section of a paper or in the "special\_details" fields of the CIF. checkCIF was carefully designed to identify outliers and unusual parameters, but every test has its limitations and alerts that are not important in a particular case may appear. Conversely, the absence of alerts does not guarantee there are no aspects of the results needing attention. It is up to the individual to critically assess their own results and, if necessary, seek expert advice.

### Publication of your CIF in IUCr journals

A basic structural check has been run on your CIF. These basic checks will be run on all CIFs submitted for publication in IUCr journals (*Acta Crystallographica*, *Journal of Applied Crystallography*, *Journal of Synchrotron Radiation*); however, if you intend to submit to *Acta Crystallographica Section C* or *E* or *IUCrData*, you should make sure that full publication checks are run on the final version of your CIF prior to submission.

### Publication of your CIF in other journals

Please refer to the *Notes for Authors* of the relevant journal for any special instructions relating to CIF submission.

---

**PLATON version of 05/12/2020; check.def file version of 05/12/2020**

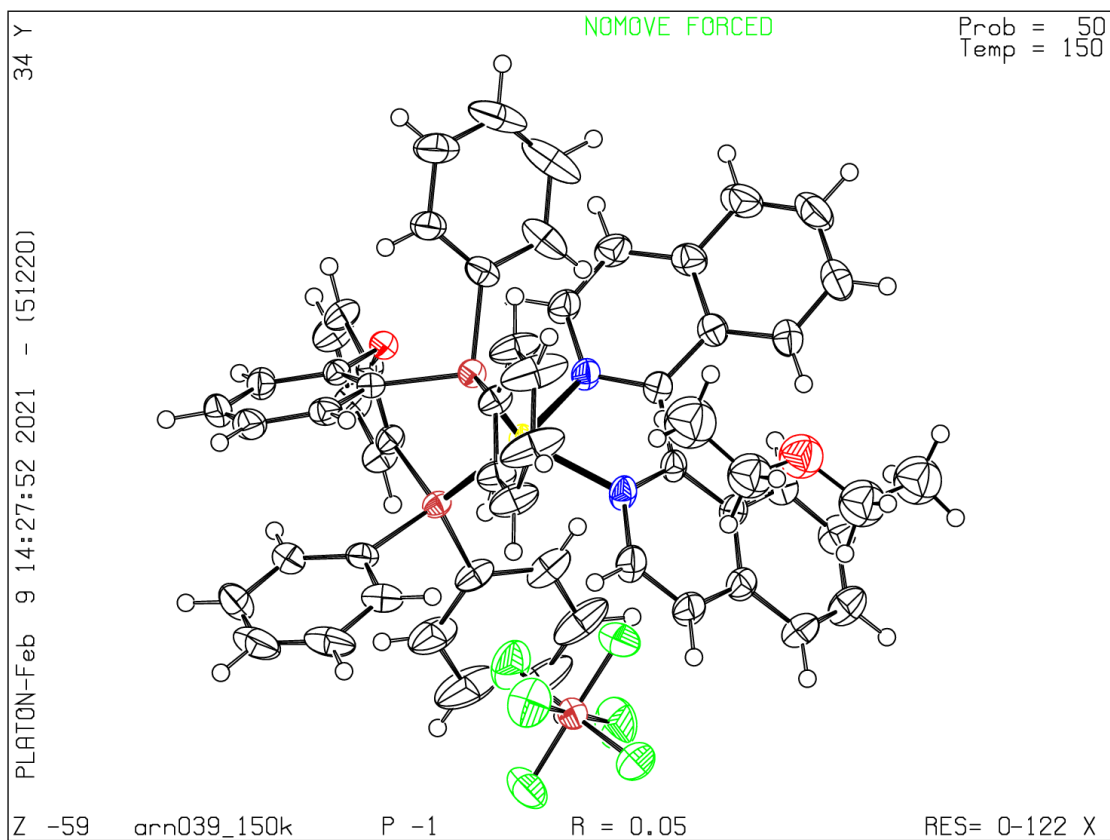

Supplement: s1 [file s1 › crystals-1107729/ARN039_150K_cifreport.pdf]
