# Supplementary material
Source: MDPI journal article supplement (https://www.mdpi.com/2073-4352/11/2/185)
Supplement: s1 [file s1]

Archive with 8 entries (6 files):
- crystals-1107729/
- crystals-1107729/ARN039_150K.cif
- crystals-1107729/ARN039_150K_cifreport.pdf
- crystals-1107729/Supporting Material revised.docx
- crystals-1107729/__MACOSX/
- crystals-1107729/__MACOSX/._ARN039_150K.cif
- crystals-1107729/__MACOSX/._ARN039_150K_cifreport.pdf
- crystals-1107729/__MACOSX/._Supporting Material revised.docx
