# Supplementary material
Source: MDPI journal article supplement (https://www.mdpi.com/2073-4352/11/2/185)
Supplement: s1 [file s1 › crystals-1107729/ARN039_150K.cif]

data_arn039_150k
_audit_creation_date               2021-02-09
_audit_creation_method
;
Olex2 1.3
(compiled 2020.11.12 svn.r5f609507 for OlexSys, GUI svn.r6226)
;
_shelx_SHELXL_version_number       '2018/3'
loop_
  _audit_author_name
  _audit_author_email
  _audit_author_address
 'Arnosti, N.' nina.arnosti@unibas.ch
;
University of Basel
Department of Chemistry
Basel
Switzerland
;
 'Prescimone, A.' alessandro.prescimone@unibas.ch
;
University of Basel
Department of Chemistry
Basel
Switzerland
;

_audit_contact_author_address
;
University of Basel
Department of Chemistry
Basel
Switzerland
;
_audit_contact_author_email        alessandro.prescimone@unibas.ch
_audit_contact_author_name         'Prescimone, A.'
_audit_contact_author_phone        ''
_publ_contact_author_id_orcid      https://orcid.org/0000-0002-3631-5210
_publ_section_references
;
Dolomanov, O.V., Bourhis, L.J., Gildea, R.J, Howard, J.A.K. & Puschmann, H.
 (2009), J. Appl. Cryst. 42, 339-341.

Sheldrick, G.M. (2015). Acta Cryst. C71, 3-8.
;
_chemical_name_common              ?
_chemical_name_systematic          ?
_chemical_formula_moiety           'C54 H40 Cu N2 O P2, F6 P, 0.5(C4 H10 O)'
_chemical_formula_sum              'C56 H45 Cu F6 N2 O1.50 P3'
_chemical_formula_weight           1040.39
_chemical_melting_point            ?
loop_
  _atom_type_symbol
  _atom_type_description
  _atom_type_scat_dispersion_real
  _atom_type_scat_dispersion_imag
  _atom_type_scat_source
 'C' 'C' 0.0148 0.0070 'International Tables Vol C Tables 4.2.6.8 and 6.1.1.4'
 'H' 'H' 0.0000 0.0000 'International Tables Vol C Tables 4.2.6.8 and 6.1.1.4'
 'Cu' 'Cu' -2.9183 3.6937
 'International Tables Vol C Tables 4.2.6.8 and 6.1.1.4'
 'F' 'F' 0.0600 0.0411 'International Tables Vol C Tables 4.2.6.8 and 6.1.1.4'
 'N' 'N' 0.0253 0.0136 'International Tables Vol C Tables 4.2.6.8 and 6.1.1.4'
 'O' 'O' 0.0412 0.0250 'International Tables Vol C Tables 4.2.6.8 and 6.1.1.4'
 'P' 'P' 0.2596 0.3354 'International Tables Vol C Tables 4.2.6.8 and 6.1.1.4'

_shelx_space_group_comment
;
The symmetry employed for this shelxl refinement is uniquely defined
by the following loop, which should always be used as a source of
symmetry information in preference to the above space-group names.
They are only intended as comments.
;
_space_group_crystal_system        'triclinic'
_space_group_IT_number             2
_space_group_name_H-M_alt          'P -1'
_space_group_name_Hall             '-P 1'
loop_
  _space_group_symop_operation_xyz
 'x, y, z'
 '-x, -y, -z'

_cell_length_a                     11.4728(3)
_cell_length_b                     14.2115(4)
_cell_length_c                     16.0992(4)
_cell_angle_alpha                  92.018(2)
_cell_angle_beta                   91.054(2)
_cell_angle_gamma                  112.546(2)
_cell_volume                       2421.34(12)
_cell_formula_units_Z              2
_cell_measurement_reflns_used      88836
_cell_measurement_temperature      150
_cell_measurement_theta_max        58.67
_cell_measurement_theta_min        2.39
_shelx_estimated_absorpt_T_max     0.579
_shelx_estimated_absorpt_T_min     0.508
_exptl_absorpt_coefficient_mu      3.409
_exptl_absorpt_correction_T_max    0.5170
_exptl_absorpt_correction_T_min    0.4058
_exptl_absorpt_correction_type     multi-scan
_exptl_absorpt_process_details
;
STOE X-Red32, absorption correction by Gaussian integration, analogous to
P. Coppens, "The Evaluation of Absorption and Extinction in Single-Crystal
Structure Analysis", published in: F. R. Ahmed (Editor), "Crystallographic
Computing", Munksgaard, Copenhagen (1970), 255 - 270.
Afterwards a spherical absorption correction was performed within STOE LANA.
;
_exptl_absorpt_special_details     ?
_exptl_crystal_colour              yellow
_exptl_crystal_colour_primary      yellow
_exptl_crystal_density_diffrn      1.427
_exptl_crystal_density_meas        ?
_exptl_crystal_density_method      ?
_exptl_crystal_description         block
_exptl_crystal_F_000               1070
_exptl_crystal_size_max            0.23
_exptl_crystal_size_mid            0.203
_exptl_crystal_size_min            0.18
_exptl_transmission_factor_max     ?
_exptl_transmission_factor_min     ?
_diffrn_reflns_av_R_equivalents    0.0577
_diffrn_reflns_av_unetI/netI       0.0360
_diffrn_reflns_Laue_measured_fraction_full  0.994
_diffrn_reflns_Laue_measured_fraction_max  0.973
_diffrn_reflns_limit_h_max         14
_diffrn_reflns_limit_h_min         -14
_diffrn_reflns_limit_k_max         16
_diffrn_reflns_limit_k_min         -17
_diffrn_reflns_limit_l_max         15
_diffrn_reflns_limit_l_min         -20
_diffrn_reflns_number              33930
_diffrn_reflns_point_group_measured_fraction_full  0.994
_diffrn_reflns_point_group_measured_fraction_max  0.973
_diffrn_reflns_theta_full          53.597
_diffrn_reflns_theta_max           58.164
_diffrn_reflns_theta_min           2.391
_diffrn_ambient_temperature        150
_diffrn_detector                   Pilatus300K
_diffrn_detector_area_resol_mean   5.81
_diffrn_detector_type              'DECTRIS PILATUS 300K'
_diffrn_measured_fraction_theta_full  0.994
_diffrn_measured_fraction_theta_max  0.973
_diffrn_measurement_device         'Eulerian 4-circle diffractometer'
_diffrn_measurement_device_type    'STOE STADIVARI'
_diffrn_measurement_method         'rotation method, \w scans'
_diffrn_radiation_collimation      '1.2 0.6 mm diameter'
_diffrn_radiation_monochromator    'Graded multilayer mirror'
_diffrn_radiation_polarisn_norm    0
_diffrn_radiation_probe            x-ray
_diffrn_radiation_type             GaK\a
_diffrn_radiation_wavelength       1.34143
_diffrn_source                     'Metaljet D2'
_diffrn_source_current             3.570
_diffrn_source_power               0.250
_diffrn_source_voltage             70
_reflns_Friedel_coverage           0.000
_reflns_Friedel_fraction_full      .
_reflns_Friedel_fraction_max       .
_reflns_number_gt                  9750
_reflns_number_total               10023
_reflns_special_details
;
 Reflections were merged by SHELXL according to the crystal
 class for the calculation of statistics and refinement.
 
 _reflns_Friedel_fraction is defined as the number of unique
 Friedel pairs measured divided by the number that would be
 possible theoretically, ignoring centric projections and
 systematic absences.
;
_reflns_threshold_expression       'I > 2\s(I)'
_computing_cell_refinement
;
X-Area Recipe 1.34.0.0 (STOE, 2019)
;
_computing_data_collection
;
X-Area Pilatus3_SV 1.31.154.0 (STOE, 2019)
;
_computing_data_reduction
;
X-Area Integrate 1.77.0.0 (STOE, 2019)
X-Area LANA 1.77.1.0 (STOE, 2019)
X-Area X-Red32 1.65.0.0 (STOE, 2018)
;
_computing_molecular_graphics      'Olex2 1.3 (Dolomanov et al., 2009)'
_computing_publication_material
;
STOE & Cie GmbH, X-Area, software package for collecting single-crystal or
multi-domain crystal data on STOE area-detector diffractometers, for image 
processing, for the correction and scaling of reflection intensities and 
for outlier rejection, version 1.88, Darmstadt 2019
;
_computing_structure_refinement    'SHELXL 2018/3 (Sheldrick, 2015)'
_computing_structure_solution      ?
_refine_diff_density_max           0.652
_refine_diff_density_min           -0.517
_refine_diff_density_rms           0.069
_refine_ls_extinction_coef         0.0013(2)
_refine_ls_extinction_expression  
 'Fc^*^=kFc[1+0.001xFc^2^\l^3^/sin(2\q)]^-1/4^'
_refine_ls_extinction_method       'SHELXL-2018/3 (Sheldrick 2018)'
_refine_ls_goodness_of_fit_ref     1.032
_refine_ls_hydrogen_treatment      constr
_refine_ls_matrix_type             full
_refine_ls_number_parameters       625
_refine_ls_number_reflns           10023
_refine_ls_number_restraints       13
_refine_ls_R_factor_all            0.0468
_refine_ls_R_factor_gt             0.0457
_refine_ls_restrained_S_all        1.033
_refine_ls_shift/su_max            0.001
_refine_ls_shift/su_mean           0.000
_refine_ls_structure_factor_coef   Fsqd
_refine_ls_weighting_details      
 'w=1/[\s^2^(Fo^2^)+(0.0847P)^2^+0.9980P] where P=(Fo^2^+2Fc^2^)/3'
_refine_ls_weighting_scheme        calc
_refine_ls_wR_factor_gt            0.1252
_refine_ls_wR_factor_ref           0.1269
_refine_special_details            ?
_olex2_refinement_description
;
1. Fixed Uiso
 At 1.2 times of:
  All C(H) groups, All C(H,H) groups
 At 1.5 times of:
  All C(H,H,H) groups
2. Restrained distances
 O2-C57
 1.41 with sigma of 0.02
 O2-C55
 1.42 with sigma of 0.02
 C58-C57
 1.48 with sigma of 0.02
 C55-C56
 1.5 with sigma of 0.02
 O2-C58 = O2-C56
 2.37 with sigma of 0.04
 C58-O2 \\sim O2-C56
 with sigma of 0.04
 O2-C57 \\sim O2-C55
 with sigma of 0.02
 C58-C57 \\sim C55-C56
 with sigma of 0.02
3. Uiso/Uaniso restraints and constraints
O2 \\sim C58 \\sim C57 \\sim C55 \\sim C56: within 2A with sigma of 0.04 and
sigma for terminal atoms of 0.08 within 2A
4. Rigid body (RIGU) restrains
 O2, C58, C57, C55, C56
 with sigma for 1-2 distances of 0.004 and sigma for 1-3 distances of 0.004
5. Others
 Fixed Sof: O2(0.5) C58(0.5) H58A(0.5) H58B(0.5) H58C(0.5) C57(0.5) H57A(0.5)
 H57B(0.5) C55(0.5) H55A(0.5) H55B(0.5) C56(0.5) H56A(0.5) H56B(0.5) H56C(0.5)
6.a Riding coordinates:
 C58(H58A,H58B,H58C), C57(H57A,H57B), C55(H55A,H55B), C56(H56A,H56B,H56C)
6.b Aromatic/amide H refined with riding coordinates:
 C8(H8), C32(H32), C40(H40), C30(H30), C11(H11), C27(H27), C42(H42), C2(H2),
 C29(H29), C41(H41), C50(H50), C39(H39), C9(H9), C14(H14), C20(H20), C16(H16),
 C54(H54), C51(H51), C1(H1), C36(H36), C44(H44), C15(H15), C10(H10), C33(H33),
 C28(H28), C13(H13), C35(H35), C24(H24), C17(H17), C34(H34), C48(H48), C45(H45),
  C18(H18), C21(H21), C53(H53), C52(H52), C47(H47), C22(H22), C46(H46), C23(H23)
;
_atom_sites_solution_hydrogens     mixed
_atom_sites_solution_primary       ?
_atom_sites_solution_secondary     ?
loop_
  _atom_site_label
  _atom_site_type_symbol
  _atom_site_fract_x
  _atom_site_fract_y
  _atom_site_fract_z
  _atom_site_U_iso_or_equiv
  _atom_site_adp_type
  _atom_site_occupancy
  _atom_site_site_symmetry_order
  _atom_site_calc_flag
  _atom_site_refinement_flags_posn
  _atom_site_refinement_flags_adp
  _atom_site_refinement_flags_occupancy
  _atom_site_disorder_assembly
  _atom_site_disorder_group
 Cu1 Cu 0.10345(2) 0.74928(2) 0.76498(2) 0.02584(10) Uani 1 1 d . . . . .
 P2 P 0.22782(4) 0.75867(3) 0.65672(3) 0.02472(11) Uani 1 1 d . . . . .
 P1 P -0.10053(4) 0.71914(3) 0.72893(3) 0.02483(11) Uani 1 1 d . . . . .
 P3 P 0.25734(5) 1.22724(4) 0.76749(3) 0.03523(13) Uani 1 1 d . . . . .
 O1 O 0.00054(12) 0.58279(10) 0.62690(8) 0.0255(3) Uani 1 1 d . . . . .
 F3 F 0.32826(16) 1.27431(14) 0.68560(10) 0.0613(4) Uani 1 1 d . . . . .
 F1 F 0.14998(16) 1.26787(15) 0.74637(10) 0.0595(4) Uani 1 1 d . . . . .
 F6 F 0.33574(18) 1.33191(12) 0.81889(11) 0.0625(4) Uani 1 1 d . . . . .
 F5 F 0.1869(2) 1.17903(16) 0.84905(10) 0.0728(5) Uani 1 1 d . . . . .
 F4 F 0.18214(18) 1.12299(13) 0.71639(11) 0.0663(5) Uani 1 1 d . . . . .
 N1 N 0.09843(17) 0.63653(12) 0.85137(10) 0.0318(3) Uani 1 1 d . . . . .
 F2 F 0.3671(2) 1.18846(15) 0.78948(13) 0.0753(6) Uani 1 1 d . . . . .
 C38 C 0.12794(17) 0.73280(14) 0.56256(11) 0.0248(3) Uani 1 1 d . . . . .
 N2 N 0.16354(17) 0.83815(12) 0.87248(10) 0.0324(4) Uani 1 1 d . . . . .
 C8 C 0.1243(2) 0.75953(17) 1.09209(13) 0.0347(4) Uani 1 1 d . . . . .
 H8 H 0.119415 0.691338 1.086683 0.042 Uiso 1 1 calc R U . . .
 C6 C 0.16245(18) 0.78552(14) 0.93916(12) 0.0280(4) Uani 1 1 d . . . . .
 C25 C -0.18258(17) 0.58322(14) 0.70050(12) 0.0266(4) Uani 1 1 d . . . . .
 C32 C -0.0639(2) 0.89104(17) 0.64284(16) 0.0400(5) Uani 1 1 d . . . . .
 H32 H 0.003006 0.922567 0.682815 0.048 Uiso 1 1 calc R U . . .
 C49 C 0.35567(18) 0.88029(14) 0.63906(13) 0.0307(4) Uani 1 1 d . . . . .
 C26 C -0.12203(17) 0.53158(13) 0.65358(11) 0.0255(3) Uani 1 1 d . . . . .
 C40 C 0.0611(2) 0.77341(17) 0.42958(13) 0.0386(5) Uani 1 1 d . . . . .
 H40 H 0.075981 0.817906 0.384812 0.046 Uiso 1 1 calc R U . . .
 C19 C -0.1969(2) 0.73958(15) 0.81134(14) 0.0369(5) Uani 1 1 d . . . . .
 C7 C 0.14646(18) 0.82024(15) 1.02099(12) 0.0299(4) Uani 1 1 d . . . . .
 C30 C -0.30090(19) 0.52526(16) 0.73059(14) 0.0353(4) Uani 1 1 d . . . . .
 H30 H -0.344724 0.558341 0.761946 0.042 Uiso 1 1 calc R U . . .
 C43 C 0.30387(18) 0.66725(14) 0.64446(14) 0.0328(4) Uani 1 1 d . . . . .
 C37 C 0.01684(17) 0.64508(13) 0.55983(11) 0.0237(3) Uani 1 1 d . . . . .
 C11 C 0.1317(3) 0.95839(19) 1.11016(16) 0.0458(5) Uani 1 1 d . . . . .
 H11 H 0.134183 1.025811 1.117031 0.055 Uiso 1 1 calc R U . . .
 C5 C 0.16649(18) 0.68304(14) 0.91910(12) 0.0286(4) Uani 1 1 d . . . . .
 C4 C 0.24144(19) 0.64057(15) 0.96391(12) 0.0314(4) Uani 1 1 d . . . . .
 C27 C -0.1757(2) 0.42708(15) 0.63879(14) 0.0359(4) Uani 1 1 d . . . . .
 H27 H -0.132608 0.393354 0.607447 0.043 Uiso 1 1 calc R U . . .
 C42 C -0.06985(19) 0.62057(16) 0.49391(12) 0.0322(4) Uani 1 1 d . . . . .
 H42 H -0.143783 0.559800 0.493028 0.039 Uiso 1 1 calc R U . . .
 C2 C 0.1463(2) 0.48949(16) 0.87217(15) 0.0413(5) Uani 1 1 d . . . . .
 H2 H 0.131708 0.420602 0.856964 0.050 Uiso 1 1 calc R U . . .
 C29 C -0.3558(2) 0.42037(17) 0.71567(15) 0.0414(5) Uani 1 1 d . . . . .
 H29 H -0.436271 0.382250 0.736781 0.050 Uiso 1 1 calc R U . . .
 C12 C 0.1450(2) 0.91976(16) 1.03010(13) 0.0351(4) Uani 1 1 d . . . . .
 C41 C -0.0470(2) 0.68643(19) 0.42885(13) 0.0393(5) Uani 1 1 d . . . . .
 H41 H -0.106602 0.671232 0.383575 0.047 Uiso 1 1 calc R U . . .
 C50 C 0.3315(2) 0.96913(16) 0.64781(14) 0.0368(4) Uani 1 1 d . . . . .
 H50 H 0.249880 0.964801 0.662557 0.044 Uiso 1 1 calc R U . . .
 C39 C 0.1489(2) 0.79650(15) 0.49556(12) 0.0312(4) Uani 1 1 d . . . . .
 H39 H 0.223964 0.856242 0.495087 0.037 Uiso 1 1 calc R U . . .
 C3 C 0.2295(2) 0.54011(17) 0.93958(14) 0.0378(5) Uani 1 1 d . . . . .
 C31 C -0.13620(19) 0.78628(15) 0.64440(13) 0.0309(4) Uani 1 1 d . . . . .
 C9 C 0.1100(2) 0.7990(2) 1.16777(15) 0.0454(5) Uani 1 1 d . . . . .
 H9 H 0.096114 0.758170 1.214921 0.054 Uiso 1 1 calc R U . . .
 C14 C 0.1606(2) 0.93301(15) 0.88238(14) 0.0394(5) Uani 1 1 d . . . . .
 H14 H 0.162776 0.970585 0.834374 0.047 Uiso 1 1 calc R U . . .
 C20 C -0.1579(3) 0.73633(17) 0.89310(15) 0.0484(6) Uani 1 1 d . . . . .
 H20 H -0.084773 0.722221 0.904322 0.058 Uiso 1 1 calc R U . . .
 C16 C 0.4020(2) 0.6498(2) 1.06641(15) 0.0465(6) Uani 1 1 d . . . . .
 H16 H 0.461670 0.686688 1.109338 0.056 Uiso 1 1 calc R U . . .
 C54 C 0.4773(2) 0.88819(17) 0.62088(19) 0.0505(7) Uani 1 1 d . . . . .
 H54 H 0.495656 0.828541 0.615474 0.061 Uiso 1 1 calc R U . . .
 C51 C 0.4252(3) 1.06348(17) 0.63526(18) 0.0507(6) Uani 1 1 d . . . . .
 H51 H 0.407265 1.123364 0.639741 0.061 Uiso 1 1 calc R U . . .
 C1 C 0.0870(2) 0.53977(15) 0.82913(14) 0.0382(5) Uani 1 1 d . . . . .
 H1 H 0.035562 0.506252 0.781625 0.046 Uiso 1 1 calc R U . . .
 C36 C -0.2336(2) 0.74154(19) 0.58535(15) 0.0427(5) Uani 1 1 d . . . . .
 H36 H -0.284335 0.670786 0.586275 0.051 Uiso 1 1 calc R U . . .
 C44 C 0.3296(2) 0.63631(18) 0.56634(17) 0.0432(5) Uani 1 1 d . . . . .
 H44 H 0.309245 0.664181 0.518017 0.052 Uiso 1 1 calc R U . . .
 C15 C 0.3325(2) 0.69547(18) 1.02694(13) 0.0368(4) Uani 1 1 d . . . . .
 H15 H 0.345239 0.764094 1.041756 0.044 Uiso 1 1 calc R U . . .
 C10 C 0.1154(3) 0.8998(2) 1.17700(16) 0.0518(6) Uani 1 1 d . . . . .
 H10 H 0.107676 0.926838 1.230489 0.062 Uiso 1 1 calc R U . . .
 C33 C -0.0898(3) 0.9485(2) 0.58336(19) 0.0553(7) Uani 1 1 d . . . . .
 H33 H -0.041606 1.019791 0.583202 0.066 Uiso 1 1 calc R U . . .
 C28 C -0.2932(2) 0.37178(16) 0.67015(16) 0.0443(5) Uani 1 1 d . . . . .
 H28 H -0.330521 0.299934 0.660113 0.053 Uiso 1 1 calc R U . . .
 C13 C 0.1545(2) 0.97578(16) 0.95815(15) 0.0410(5) Uani 1 1 d . . . . .
 H13 H 0.156719 1.043270 0.962680 0.049 Uiso 1 1 calc R U . . .
 C35 C -0.2569(3) 0.8002(3) 0.52493(18) 0.0597(8) Uani 1 1 d . . . . .
 H35 H -0.322563 0.769234 0.483989 0.072 Uiso 1 1 calc R U . . .
 C24 C -0.3052(3) 0.7589(2) 0.7955(2) 0.0642(8) Uani 1 1 d . . . . .
 H24 H -0.332540 0.762151 0.740030 0.077 Uiso 1 1 calc R U . . .
 C17 C 0.3864(3) 0.5493(2) 1.04433(17) 0.0550(7) Uani 1 1 d . . . . .
 H17 H 0.433939 0.518143 1.073355 0.066 Uiso 1 1 calc R U . . .
 C34 C -0.1851(3) 0.9032(3) 0.52425(19) 0.0605(8) Uani 1 1 d . . . . .
 H34 H -0.201360 0.943059 0.482870 0.073 Uiso 1 1 calc R U . . .
 C48 C 0.3356(2) 0.6268(2) 0.71409(19) 0.0532(7) Uani 1 1 d . . . . .
 H48 H 0.321304 0.648661 0.768014 0.064 Uiso 1 1 calc R U . . .
 C45 C 0.3849(2) 0.5649(2) 0.5584(2) 0.0592(8) Uani 1 1 d . . . . .
 H45 H 0.403242 0.544947 0.504880 0.071 Uiso 1 1 calc R U . . .
 C18 C 0.3037(3) 0.4959(2) 0.98173(17) 0.0524(6) Uani 1 1 d . . . . .
 H18 H 0.295718 0.428484 0.966262 0.063 Uiso 1 1 calc R U . . .
 C21 C -0.2260(4) 0.7538(2) 0.9586(2) 0.0693(10) Uani 1 1 d . . . . .
 H21 H -0.197938 0.752912 1.014398 0.083 Uiso 1 1 calc R U . . .
 C53 C 0.5715(3) 0.9832(2) 0.6107(3) 0.0773(12) Uani 1 1 d . . . . .
 H53 H 0.654958 0.988624 0.599934 0.093 Uiso 1 1 calc R U . . .
 C52 C 0.5449(3) 1.07010(19) 0.6162(2) 0.0732(11) Uani 1 1 d . . . . .
 H52 H 0.609134 1.134622 0.606780 0.088 Uiso 1 1 calc R U . . .
 C47 C 0.3889(3) 0.5537(3) 0.7050(3) 0.0782(12) Uani 1 1 d . . . . .
 H47 H 0.408644 0.524783 0.752888 0.094 Uiso 1 1 calc R U . . .
 C22 C -0.3321(4) 0.7719(2) 0.9433(3) 0.0853(14) Uani 1 1 d . . . . .
 H22 H -0.377973 0.783604 0.988316 0.102 Uiso 1 1 calc R U . . .
 C46 C 0.4128(3) 0.5234(2) 0.6278(3) 0.0701(10) Uani 1 1 d . . . . .
 H46 H 0.448794 0.473544 0.622284 0.084 Uiso 1 1 calc R U . . .
 C23 C -0.3735(3) 0.7736(3) 0.8629(3) 0.0908(15) Uani 1 1 d . . . . .
 H23 H -0.448940 0.784702 0.852746 0.109 Uiso 1 1 calc R U . . .
 O2 O 0.4814(4) 0.9626(3) 0.9865(3) 0.0637(10) Uiso 0.5 1 d D U P A -1
 C58 C 0.4930(9) 0.9542(7) 0.8398(5) 0.089(2) Uiso 0.5 1 d D U P A -1
 H58A H 0.557104 0.926535 0.843721 0.134 Uiso 0.5 1 d R U P A -1
 H58B H 0.411433 0.899555 0.834531 0.134 Uiso 0.5 1 d R U P A -1
 H58C H 0.506304 0.994975 0.791841 0.134 Uiso 0.5 1 d R U P A -1
 C57 C 0.4999(7) 1.0171(6) 0.9130(4) 0.0655(16) Uiso 0.5 1 d D U P A -1
 H57A H 0.582445 1.072309 0.917352 0.079 Uiso 0.5 1 d R U P A -1
 H57B H 0.435255 1.045049 0.908062 0.079 Uiso 0.5 1 d R U P A -1
 C55 C 0.4975(8) 1.0228(6) 1.0584(5) 0.0722(18) Uiso 0.5 1 d D U P A -1
 H55A H 0.435549 1.053807 1.057681 0.087 Uiso 0.5 1 d R U P A -1
 H55B H 0.581789 1.075727 1.060421 0.087 Uiso 0.5 1 d R U P A -1
 C56 C 0.4812(8) 0.9635(6) 1.1365(5) 0.0762(18) Uiso 0.5 1 d D U P A -1
 H56A H 0.402097 0.905933 1.132396 0.114 Uiso 0.5 1 d R U P A -1
 H56B H 0.548997 0.940133 1.142096 0.114 Uiso 0.5 1 d R U P A -1
 H56C H 0.482197 1.006253 1.184256 0.114 Uiso 0.5 1 d R U P A -1

loop_
  _atom_site_aniso_label
  _atom_site_aniso_U_11
  _atom_site_aniso_U_22
  _atom_site_aniso_U_33
  _atom_site_aniso_U_23
  _atom_site_aniso_U_13
  _atom_site_aniso_U_12
 Cu1 0.02653(16) 0.02331(15) 0.02335(16) 0.00086(11) -0.00230(11) 0.00492(11)
 P2 0.0215(2) 0.0212(2) 0.0288(2) 0.00137(17) -0.00055(16) 0.00521(16)
 P1 0.0239(2) 0.0213(2) 0.0275(2) -0.00190(16) 0.00209(17) 0.00687(17)
 P3 0.0400(3) 0.0342(3) 0.0334(3) -0.0006(2) -0.0056(2) 0.0169(2)
 O1 0.0239(6) 0.0239(6) 0.0276(6) 0.0021(5) 0.0007(5) 0.0080(5)
 F3 0.0523(9) 0.0664(10) 0.0535(9) 0.0061(8) 0.0139(7) 0.0091(8)
 F1 0.0550(9) 0.0868(12) 0.0529(9) 0.0163(8) 0.0003(7) 0.0440(9)
 F6 0.0747(11) 0.0461(8) 0.0674(10) -0.0209(7) -0.0212(8) 0.0272(8)
 F5 0.0957(14) 0.0825(13) 0.0412(8) 0.0240(8) 0.0073(8) 0.0333(11)
 F4 0.0695(11) 0.0467(9) 0.0642(10) -0.0130(7) -0.0146(8) 0.0039(8)
 N1 0.0402(9) 0.0217(7) 0.0304(8) 0.0002(6) -0.0053(7) 0.0088(7)
 F2 0.0836(13) 0.0768(12) 0.0871(13) -0.0229(10) -0.0325(10) 0.0587(11)
 C38 0.0262(8) 0.0243(8) 0.0263(9) -0.0002(7) 0.0012(7) 0.0125(7)
 N2 0.0389(9) 0.0222(7) 0.0293(8) -0.0003(6) -0.0071(7) 0.0047(7)
 C8 0.0323(10) 0.0347(10) 0.0352(10) 0.0042(8) 0.0038(8) 0.0105(8)
 C6 0.0296(9) 0.0231(8) 0.0264(9) 0.0001(7) -0.0049(7) 0.0049(7)
 C25 0.0252(8) 0.0226(8) 0.0283(9) -0.0016(7) 0.0004(7) 0.0055(7)
 C32 0.0400(11) 0.0329(10) 0.0528(13) 0.0076(9) 0.0123(10) 0.0195(9)
 C49 0.0271(9) 0.0228(8) 0.0364(10) -0.0023(7) 0.0064(7) 0.0032(7)
 C26 0.0249(8) 0.0219(8) 0.0262(8) 0.0005(7) -0.0005(7) 0.0053(7)
 C40 0.0549(13) 0.0404(11) 0.0296(10) 0.0076(8) 0.0046(9) 0.0276(10)
 C19 0.0332(10) 0.0271(9) 0.0432(11) -0.0083(8) 0.0123(9) 0.0038(8)
 C7 0.0276(9) 0.0274(9) 0.0301(9) -0.0018(7) -0.0023(7) 0.0058(7)
 C30 0.0289(10) 0.0321(10) 0.0399(11) -0.0018(8) 0.0076(8) 0.0063(8)
 C43 0.0221(8) 0.0231(9) 0.0508(12) 0.0043(8) -0.0048(8) 0.0059(7)
 C37 0.0247(8) 0.0251(8) 0.0227(8) 0.0004(6) 0.0027(6) 0.0112(7)
 C11 0.0549(14) 0.0373(12) 0.0445(13) -0.0092(10) 0.0023(10) 0.0177(10)
 C5 0.0312(9) 0.0241(9) 0.0266(9) 0.0032(7) 0.0013(7) 0.0060(7)
 C4 0.0329(10) 0.0324(10) 0.0282(9) 0.0068(8) 0.0031(7) 0.0114(8)
 C27 0.0388(11) 0.0251(9) 0.0397(11) -0.0059(8) 0.0039(9) 0.0083(8)
 C42 0.0293(9) 0.0383(10) 0.0289(9) -0.0025(8) -0.0015(7) 0.0133(8)
 C2 0.0566(14) 0.0241(9) 0.0425(12) 0.0022(8) 0.0023(10) 0.0146(9)
 C29 0.0324(10) 0.0314(10) 0.0481(12) 0.0021(9) 0.0091(9) -0.0018(8)
 C12 0.0366(10) 0.0295(10) 0.0357(11) -0.0037(8) -0.0045(8) 0.0093(8)
 C41 0.0458(12) 0.0527(13) 0.0277(10) -0.0007(9) -0.0056(8) 0.0287(11)
 C50 0.0349(10) 0.0267(9) 0.0468(12) 0.0017(8) 0.0096(9) 0.0092(8)
 C39 0.0389(10) 0.0279(9) 0.0304(9) 0.0058(7) 0.0071(8) 0.0163(8)
 C3 0.0451(12) 0.0349(11) 0.0371(11) 0.0096(9) 0.0060(9) 0.0184(9)
 C31 0.0314(9) 0.0307(9) 0.0360(10) 0.0003(8) 0.0023(8) 0.0179(8)
 C9 0.0501(13) 0.0504(13) 0.0350(11) 0.0073(10) 0.0114(10) 0.0178(11)
 C14 0.0541(13) 0.0208(9) 0.0360(11) 0.0017(8) -0.0101(9) 0.0066(9)
 C20 0.0656(16) 0.0287(10) 0.0399(12) -0.0025(9) 0.0223(11) 0.0053(10)
 C16 0.0384(12) 0.0707(17) 0.0351(11) 0.0085(11) -0.0006(9) 0.0257(12)
 C54 0.0357(11) 0.0262(10) 0.0828(19) -0.0108(11) 0.0214(12) 0.0046(9)
 C51 0.0570(15) 0.0238(10) 0.0649(16) -0.0016(10) 0.0229(12) 0.0078(10)
 C1 0.0489(12) 0.0224(9) 0.0381(11) -0.0024(8) -0.0050(9) 0.0086(8)
 C36 0.0446(12) 0.0461(12) 0.0448(12) -0.0046(10) -0.0083(10) 0.0266(10)
 C44 0.0354(11) 0.0360(11) 0.0615(15) -0.0136(10) -0.0129(10) 0.0193(9)
 C15 0.0320(10) 0.0462(12) 0.0308(10) 0.0031(9) 0.0006(8) 0.0132(9)
 C10 0.0627(16) 0.0561(15) 0.0366(12) -0.0060(11) 0.0097(11) 0.0231(13)
 C33 0.0653(17) 0.0480(14) 0.0707(18) 0.0249(13) 0.0243(14) 0.0391(13)
 C28 0.0438(12) 0.0215(9) 0.0548(14) -0.0037(9) 0.0065(10) -0.0013(8)
 C13 0.0537(13) 0.0227(9) 0.0429(12) -0.0043(8) -0.0100(10) 0.0116(9)
 C35 0.0650(17) 0.087(2) 0.0480(14) -0.0017(14) -0.0129(12) 0.0536(17)
 C24 0.0388(13) 0.0680(18) 0.084(2) -0.0288(16) 0.0126(13) 0.0203(13)
 C17 0.0592(16) 0.0743(18) 0.0478(14) 0.0161(13) -0.0008(12) 0.0429(15)
 C34 0.077(2) 0.077(2) 0.0563(16) 0.0256(14) 0.0172(14) 0.0594(18)
 C48 0.0347(12) 0.0637(16) 0.0693(17) 0.0309(13) 0.0067(11) 0.0254(11)
 C45 0.0382(12) 0.0428(13) 0.100(2) -0.0234(14) -0.0149(13) 0.0222(11)
 C18 0.0699(17) 0.0507(14) 0.0510(14) 0.0148(11) 0.0068(12) 0.0380(13)
 C21 0.099(3) 0.0356(13) 0.0542(16) -0.0052(11) 0.0450(17) 0.0031(14)
 C53 0.0425(14) 0.0343(13) 0.140(3) -0.0169(16) 0.0473(18) -0.0019(11)
 C52 0.0586(17) 0.0254(11) 0.116(3) -0.0133(14) 0.0483(18) -0.0057(11)
 C47 0.0478(16) 0.083(2) 0.122(3) 0.057(2) 0.0130(18) 0.0403(16)
 C22 0.083(2) 0.0474(16) 0.096(3) -0.0265(17) 0.064(2) -0.0067(15)
 C46 0.0385(13) 0.0420(14) 0.139(3) 0.0156(17) 0.0018(17) 0.0252(11)
 C23 0.0475(17) 0.084(2) 0.130(4) -0.044(2) 0.034(2) 0.0170(16)

_geom_special_details
;
 All esds (except the esd in the dihedral angle between two l.s. planes)
 are estimated using the full covariance matrix.  The cell esds are taken
 into account individually in the estimation of esds in distances, angles
 and torsion angles; correlations between esds in cell parameters are only
 used when they are defined by crystal symmetry.  An approximate (isotropic)
 treatment of cell esds is used for estimating esds involving l.s. planes.
;
loop_
  _geom_bond_atom_site_label_1
  _geom_bond_atom_site_label_2
  _geom_bond_distance
  _geom_bond_site_symmetry_2
  _geom_bond_publ_flag
 Cu1 P2 2.2480(5) . ?
 Cu1 P1 2.2718(5) . ?
 Cu1 N1 2.1434(16) . ?
 Cu1 N2 2.0495(17) . ?
 P2 C38 1.8221(19) . ?
 P2 C49 1.8236(19) . ?
 P2 C43 1.829(2) . ?
 P1 C25 1.8315(19) . ?
 P1 C19 1.828(2) . ?
 P1 C31 1.817(2) . ?
 P3 F3 1.5911(17) . ?
 P3 F1 1.5842(15) . ?
 P3 F6 1.6020(16) . ?
 P3 F5 1.5890(18) . ?
 P3 F4 1.5887(16) . ?
 P3 F2 1.5947(17) . ?
 O1 C26 1.397(2) . ?
 O1 C37 1.390(2) . ?
 N1 C5 1.326(3) . ?
 N1 C1 1.365(3) . ?
 C38 C37 1.399(3) . ?
 C38 C39 1.397(3) . ?
 N2 C6 1.327(2) . ?
 N2 C14 1.365(3) . ?
 C8 H8 0.9500 . ?
 C8 C7 1.425(3) . ?
 C8 C9 1.362(3) . ?
 C6 C7 1.430(3) . ?
 C6 C5 1.499(3) . ?
 C25 C26 1.401(3) . ?
 C25 C30 1.397(3) . ?
 C32 H32 0.9500 . ?
 C32 C31 1.400(3) . ?
 C32 C33 1.380(3) . ?
 C49 C50 1.396(3) . ?
 C49 C54 1.394(3) . ?
 C26 C27 1.382(3) . ?
 C40 H40 0.9500 . ?
 C40 C41 1.375(4) . ?
 C40 C39 1.390(3) . ?
 C19 C20 1.391(4) . ?
 C19 C24 1.393(4) . ?
 C7 C12 1.423(3) . ?
 C30 H30 0.9500 . ?
 C30 C29 1.388(3) . ?
 C43 C44 1.392(3) . ?
 C43 C48 1.382(3) . ?
 C37 C42 1.381(3) . ?
 C11 H11 0.9500 . ?
 C11 C12 1.417(3) . ?
 C11 C10 1.355(4) . ?
 C5 C4 1.425(3) . ?
 C4 C3 1.421(3) . ?
 C4 C15 1.418(3) . ?
 C27 H27 0.9500 . ?
 C27 C28 1.389(3) . ?
 C42 H42 0.9500 . ?
 C42 C41 1.390(3) . ?
 C2 H2 0.9500 . ?
 C2 C3 1.410(3) . ?
 C2 C1 1.357(3) . ?
 C29 H29 0.9500 . ?
 C29 C28 1.376(3) . ?
 C12 C13 1.411(3) . ?
 C41 H41 0.9500 . ?
 C50 H50 0.9500 . ?
 C50 C51 1.384(3) . ?
 C39 H39 0.9500 . ?
 C3 C18 1.414(3) . ?
 C31 C36 1.389(3) . ?
 C9 H9 0.9500 . ?
 C9 C10 1.413(4) . ?
 C14 H14 0.9500 . ?
 C14 C13 1.358(3) . ?
 C20 H20 0.9500 . ?
 C20 C21 1.395(3) . ?
 C16 H16 0.9500 . ?
 C16 C15 1.366(3) . ?
 C16 C17 1.402(4) . ?
 C54 H54 0.9500 . ?
 C54 C53 1.386(3) . ?
 C51 H51 0.9500 . ?
 C51 C52 1.381(4) . ?
 C1 H1 0.9500 . ?
 C36 H36 0.9500 . ?
 C36 C35 1.390(4) . ?
 C44 H44 0.9500 . ?
 C44 C45 1.391(3) . ?
 C15 H15 0.9500 . ?
 C10 H10 0.9500 . ?
 C33 H33 0.9500 . ?
 C33 C34 1.376(5) . ?
 C28 H28 0.9500 . ?
 C13 H13 0.9500 . ?
 C35 H35 0.9500 . ?
 C35 C34 1.378(5) . ?
 C24 H24 0.9500 . ?
 C24 C23 1.404(4) . ?
 C17 H17 0.9500 . ?
 C17 C18 1.360(4) . ?
 C34 H34 0.9500 . ?
 C48 H48 0.9500 . ?
 C48 C47 1.397(4) . ?
 C45 H45 0.9500 . ?
 C45 C46 1.370(5) . ?
 C18 H18 0.9500 . ?
 C21 H21 0.9500 . ?
 C21 C22 1.359(6) . ?
 C53 H53 0.9500 . ?
 C53 C52 1.382(4) . ?
 C52 H52 0.9500 . ?
 C47 H47 0.9500 . ?
 C47 C46 1.368(6) . ?
 C22 H22 0.9500 . ?
 C22 C23 1.375(7) . ?
 C46 H46 0.9500 . ?
 C23 H23 0.9500 . ?
 O2 C57 1.412(8) . ?
 O2 C55 1.381(8) . ?
 C58 H58A 0.9600 . ?
 C58 H58B 0.9600 . ?
 C58 H58C 0.9600 . ?
 C58 C57 1.436(9) . ?
 C57 H57A 0.9700 . ?
 C57 H57B 0.9701 . ?
 C55 H55A 0.9700 . ?
 C55 H55B 0.9700 . ?
 C55 C56 1.512(9) . ?
 C56 H56A 0.9600 . ?
 C56 H56B 0.9601 . ?
 C56 H56C 0.9601 . ?

loop_
  _geom_angle_atom_site_label_1
  _geom_angle_atom_site_label_2
  _geom_angle_atom_site_label_3
  _geom_angle
  _geom_angle_site_symmetry_1
  _geom_angle_site_symmetry_3
  _geom_angle_publ_flag
 P2 Cu1 P1 114.455(19) . . ?
 N1 Cu1 P2 114.32(5) . . ?
 N1 Cu1 P1 106.53(5) . . ?
 N2 Cu1 P2 123.53(5) . . ?
 N2 Cu1 P1 112.46(6) . . ?
 N2 Cu1 N1 79.30(6) . . ?
 C38 P2 Cu1 107.11(6) . . ?
 C38 P2 C49 103.85(9) . . ?
 C38 P2 C43 102.52(9) . . ?
 C49 P2 Cu1 118.57(6) . . ?
 C49 P2 C43 102.97(9) . . ?
 C43 P2 Cu1 119.68(7) . . ?
 C25 P1 Cu1 108.67(6) . . ?
 C19 P1 Cu1 116.37(8) . . ?
 C19 P1 C25 102.65(9) . . ?
 C31 P1 Cu1 120.00(7) . . ?
 C31 P1 C25 105.66(9) . . ?
 C31 P1 C19 101.71(10) . . ?
 F3 P3 F6 90.00(10) . . ?
 F3 P3 F2 89.34(12) . . ?
 F1 P3 F3 90.50(9) . . ?
 F1 P3 F6 90.04(10) . . ?
 F1 P3 F5 90.03(10) . . ?
 F1 P3 F4 91.07(11) . . ?
 F1 P3 F2 178.91(11) . . ?
 F5 P3 F3 179.30(11) . . ?
 F5 P3 F6 90.47(11) . . ?
 F5 P3 F2 90.14(12) . . ?
 F4 P3 F3 89.62(10) . . ?
 F4 P3 F6 178.83(11) . . ?
 F4 P3 F5 89.91(11) . . ?
 F4 P3 F2 90.01(10) . . ?
 F2 P3 F6 88.88(10) . . ?
 C37 O1 C26 118.02(14) . . ?
 C5 N1 Cu1 108.83(12) . . ?
 C5 N1 C1 119.39(18) . . ?
 C1 N1 Cu1 124.39(14) . . ?
 C37 C38 P2 116.94(13) . . ?
 C39 C38 P2 125.45(15) . . ?
 C39 C38 C37 117.47(17) . . ?
 C6 N2 Cu1 113.69(12) . . ?
 C6 N2 C14 119.28(18) . . ?
 C14 N2 Cu1 123.02(14) . . ?
 C7 C8 H8 119.9 . . ?
 C9 C8 H8 119.9 . . ?
 C9 C8 C7 120.2(2) . . ?
 N2 C6 C7 122.40(18) . . ?
 N2 C6 C5 113.52(16) . . ?
 C7 C6 C5 123.82(17) . . ?
 C26 C25 P1 120.15(14) . . ?
 C30 C25 P1 122.14(15) . . ?
 C30 C25 C26 117.43(17) . . ?
 C31 C32 H32 119.9 . . ?
 C33 C32 H32 119.9 . . ?
 C33 C32 C31 120.1(3) . . ?
 C50 C49 P2 118.34(15) . . ?
 C54 C49 P2 122.62(16) . . ?
 C54 C49 C50 118.97(19) . . ?
 O1 C26 C25 120.81(16) . . ?
 C27 C26 O1 117.35(17) . . ?
 C27 C26 C25 121.56(18) . . ?
 C41 C40 H40 119.9 . . ?
 C41 C40 C39 120.27(19) . . ?
 C39 C40 H40 119.9 . . ?
 C20 C19 P1 117.47(19) . . ?
 C20 C19 C24 119.5(2) . . ?
 C24 C19 P1 123.0(2) . . ?
 C8 C7 C6 124.24(18) . . ?
 C12 C7 C8 118.46(19) . . ?
 C12 C7 C6 117.18(18) . . ?
 C25 C30 H30 119.3 . . ?
 C29 C30 C25 121.39(19) . . ?
 C29 C30 H30 119.3 . . ?
 C44 C43 P2 121.55(16) . . ?
 C48 C43 P2 119.58(19) . . ?
 C48 C43 C44 118.9(2) . . ?
 O1 C37 C38 115.72(15) . . ?
 C42 C37 O1 122.03(17) . . ?
 C42 C37 C38 122.24(17) . . ?
 C12 C11 H11 119.8 . . ?
 C10 C11 H11 119.8 . . ?
 C10 C11 C12 120.5(2) . . ?
 N1 C5 C6 113.33(17) . . ?
 N1 C5 C4 121.99(18) . . ?
 C4 C5 C6 124.56(17) . . ?
 C3 C4 C5 117.55(19) . . ?
 C15 C4 C5 123.54(19) . . ?
 C15 C4 C3 118.76(19) . . ?
 C26 C27 H27 120.3 . . ?
 C26 C27 C28 119.43(19) . . ?
 C28 C27 H27 120.3 . . ?
 C37 C42 H42 120.6 . . ?
 C37 C42 C41 118.81(19) . . ?
 C41 C42 H42 120.6 . . ?
 C3 C2 H2 120.2 . . ?
 C1 C2 H2 120.2 . . ?
 C1 C2 C3 119.60(19) . . ?
 C30 C29 H29 120.1 . . ?
 C28 C29 C30 119.7(2) . . ?
 C28 C29 H29 120.1 . . ?
 C11 C12 C7 119.3(2) . . ?
 C13 C12 C7 118.33(19) . . ?
 C13 C12 C11 122.3(2) . . ?
 C40 C41 C42 120.47(19) . . ?
 C40 C41 H41 119.8 . . ?
 C42 C41 H41 119.8 . . ?
 C49 C50 H50 119.6 . . ?
 C51 C50 C49 120.7(2) . . ?
 C51 C50 H50 119.6 . . ?
 C38 C39 H39 119.6 . . ?
 C40 C39 C38 120.7(2) . . ?
 C40 C39 H39 119.6 . . ?
 C2 C3 C4 118.2(2) . . ?
 C2 C3 C18 122.5(2) . . ?
 C18 C3 C4 119.3(2) . . ?
 C32 C31 P1 116.58(17) . . ?
 C36 C31 P1 124.23(17) . . ?
 C36 C31 C32 119.1(2) . . ?
 C8 C9 H9 119.6 . . ?
 C8 C9 C10 120.8(2) . . ?
 C10 C9 H9 119.6 . . ?
 N2 C14 H14 118.7 . . ?
 C13 C14 N2 122.6(2) . . ?
 C13 C14 H14 118.7 . . ?
 C19 C20 H20 120.0 . . ?
 C19 C20 C21 120.1(3) . . ?
 C21 C20 H20 120.0 . . ?
 C15 C16 H16 119.6 . . ?
 C15 C16 C17 120.8(2) . . ?
 C17 C16 H16 119.6 . . ?
 C49 C54 H54 120.0 . . ?
 C53 C54 C49 119.9(2) . . ?
 C53 C54 H54 120.0 . . ?
 C50 C51 H51 120.2 . . ?
 C52 C51 C50 119.7(2) . . ?
 C52 C51 H51 120.2 . . ?
 N1 C1 H1 118.7 . . ?
 C2 C1 N1 122.6(2) . . ?
 C2 C1 H1 118.7 . . ?
 C31 C36 H36 120.0 . . ?
 C31 C36 C35 120.0(2) . . ?
 C35 C36 H36 120.0 . . ?
 C43 C44 H44 119.7 . . ?
 C45 C44 C43 120.6(3) . . ?
 C45 C44 H44 119.7 . . ?
 C4 C15 H15 119.9 . . ?
 C16 C15 C4 120.1(2) . . ?
 C16 C15 H15 119.9 . . ?
 C11 C10 C9 120.5(2) . . ?
 C11 C10 H10 119.7 . . ?
 C9 C10 H10 119.7 . . ?
 C32 C33 H33 119.8 . . ?
 C34 C33 C32 120.4(3) . . ?
 C34 C33 H33 119.8 . . ?
 C27 C28 H28 119.8 . . ?
 C29 C28 C27 120.44(19) . . ?
 C29 C28 H28 119.8 . . ?
 C12 C13 H13 120.1 . . ?
 C14 C13 C12 119.87(19) . . ?
 C14 C13 H13 120.1 . . ?
 C36 C35 H35 119.9 . . ?
 C34 C35 C36 120.2(3) . . ?
 C34 C35 H35 119.9 . . ?
 C19 C24 H24 120.5 . . ?
 C19 C24 C23 119.0(4) . . ?
 C23 C24 H24 120.5 . . ?
 C16 C17 H17 119.7 . . ?
 C18 C17 C16 120.6(2) . . ?
 C18 C17 H17 119.7 . . ?
 C33 C34 C35 120.2(2) . . ?
 C33 C34 H34 119.9 . . ?
 C35 C34 H34 119.9 . . ?
 C43 C48 H48 120.1 . . ?
 C43 C48 C47 119.9(3) . . ?
 C47 C48 H48 120.1 . . ?
 C44 C45 H45 120.0 . . ?
 C46 C45 C44 120.0(3) . . ?
 C46 C45 H45 120.0 . . ?
 C3 C18 H18 119.8 . . ?
 C17 C18 C3 120.3(2) . . ?
 C17 C18 H18 119.8 . . ?
 C20 C21 H21 119.8 . . ?
 C22 C21 C20 120.4(3) . . ?
 C22 C21 H21 119.8 . . ?
 C54 C53 H53 119.8 . . ?
 C52 C53 C54 120.4(2) . . ?
 C52 C53 H53 119.8 . . ?
 C51 C52 C53 120.2(2) . . ?
 C51 C52 H52 119.9 . . ?
 C53 C52 H52 119.9 . . ?
 C48 C47 H47 119.7 . . ?
 C46 C47 C48 120.6(3) . . ?
 C46 C47 H47 119.7 . . ?
 C21 C22 H22 119.8 . . ?
 C21 C22 C23 120.3(3) . . ?
 C23 C22 H22 119.8 . . ?
 C45 C46 H46 120.0 . . ?
 C47 C46 C45 120.1(2) . . ?
 C47 C46 H46 120.0 . . ?
 C24 C23 H23 119.7 . . ?
 C22 C23 C24 120.6(4) . . ?
 C22 C23 H23 119.7 . . ?
 C55 O2 C57 113.9(5) . . ?
 H58A C58 H58B 109.5 . . ?
 H58A C58 H58C 109.5 . . ?
 H58B C58 H58C 109.5 . . ?
 C57 C58 H58A 109.5 . . ?
 C57 C58 H58B 109.8 . . ?
 C57 C58 H58C 109.1 . . ?
 O2 C57 C58 112.7(6) . . ?
 O2 C57 H57A 108.4 . . ?
 O2 C57 H57B 108.5 . . ?
 C58 C57 H57A 109.1 . . ?
 C58 C57 H57B 108.7 . . ?
 H57A C57 H57B 109.5 . . ?
 O2 C55 H55A 108.7 . . ?
 O2 C55 H55B 109.0 . . ?
 O2 C55 C56 113.1(7) . . ?
 H55A C55 H55B 109.5 . . ?
 C56 C55 H55A 108.1 . . ?
 C56 C55 H55B 108.4 . . ?
 C55 C56 H56A 109.3 . . ?
 C55 C56 H56B 109.1 . . ?
 C55 C56 H56C 110.1 . . ?
 H56A C56 H56B 109.5 . . ?
 H56A C56 H56C 109.5 . . ?
 H56B C56 H56C 109.5 . . ?

loop_
  _geom_torsion_atom_site_label_1
  _geom_torsion_atom_site_label_2
  _geom_torsion_atom_site_label_3
  _geom_torsion_atom_site_label_4
  _geom_torsion
  _geom_torsion_site_symmetry_1
  _geom_torsion_site_symmetry_2
  _geom_torsion_site_symmetry_3
  _geom_torsion_site_symmetry_4
  _geom_torsion_publ_flag
 Cu1 P2 C38 C37 -50.71(14) . . . . ?
 Cu1 P2 C38 C39 124.84(15) . . . . ?
 Cu1 P2 C49 C50 -42.2(2) . . . . ?
 Cu1 P2 C49 C54 134.9(2) . . . . ?
 Cu1 P2 C43 C44 149.27(15) . . . . ?
 Cu1 P2 C43 C48 -30.0(2) . . . . ?
 Cu1 P1 C25 C26 -40.57(17) . . . . ?
 Cu1 P1 C25 C30 133.21(16) . . . . ?
 Cu1 P1 C19 C20 -22.08(19) . . . . ?
 Cu1 P1 C19 C24 157.27(19) . . . . ?
 Cu1 P1 C31 C32 -44.23(17) . . . . ?
 Cu1 P1 C31 C36 139.46(16) . . . . ?
 Cu1 N1 C5 C6 33.1(2) . . . . ?
 Cu1 N1 C5 C4 -143.19(16) . . . . ?
 Cu1 N1 C1 C2 144.3(2) . . . . ?
 Cu1 N2 C6 C7 -152.21(15) . . . . ?
 Cu1 N2 C6 C5 22.1(2) . . . . ?
 Cu1 N2 C14 C13 154.98(19) . . . . ?
 P2 C38 C37 O1 -5.2(2) . . . . ?
 P2 C38 C37 C42 176.22(14) . . . . ?
 P2 C38 C39 C40 -174.71(15) . . . . ?
 P2 C49 C50 C51 179.9(2) . . . . ?
 P2 C49 C54 C53 -177.9(3) . . . . ?
 P2 C43 C44 C45 -178.51(19) . . . . ?
 P2 C43 C48 C47 177.3(2) . . . . ?
 P1 C25 C26 O1 -0.8(2) . . . . ?
 P1 C25 C26 C27 172.84(16) . . . . ?
 P1 C25 C30 C29 -173.07(18) . . . . ?
 P1 C19 C20 C21 178.49(18) . . . . ?
 P1 C19 C24 C23 179.9(2) . . . . ?
 P1 C31 C36 C35 177.32(19) . . . . ?
 O1 C26 C27 C28 174.7(2) . . . . ?
 O1 C37 C42 C41 -179.80(17) . . . . ?
 N1 C5 C4 C3 -7.4(3) . . . . ?
 N1 C5 C4 C15 168.11(19) . . . . ?
 C38 P2 C49 C50 76.46(19) . . . . ?
 C38 P2 C49 C54 -106.5(2) . . . . ?
 C38 P2 C43 C44 31.01(19) . . . . ?
 C38 P2 C43 C48 -148.31(18) . . . . ?
 C38 C37 C42 C41 -1.3(3) . . . . ?
 N2 C6 C7 C8 169.37(19) . . . . ?
 N2 C6 C7 C12 -6.5(3) . . . . ?
 N2 C6 C5 N1 -38.5(2) . . . . ?
 N2 C6 C5 C4 137.7(2) . . . . ?
 N2 C14 C13 C12 -3.0(4) . . . . ?
 C8 C7 C12 C11 5.0(3) . . . . ?
 C8 C7 C12 C13 -173.8(2) . . . . ?
 C8 C9 C10 C11 1.8(4) . . . . ?
 C6 N2 C14 C13 -1.0(3) . . . . ?
 C6 C7 C12 C11 -178.9(2) . . . . ?
 C6 C7 C12 C13 2.3(3) . . . . ?
 C6 C5 C4 C3 176.77(18) . . . . ?
 C6 C5 C4 C15 -7.7(3) . . . . ?
 C25 P1 C19 C20 96.44(17) . . . . ?
 C25 P1 C19 C24 -84.2(2) . . . . ?
 C25 P1 C31 C32 -167.31(15) . . . . ?
 C25 P1 C31 C36 16.4(2) . . . . ?
 C25 C26 C27 C28 0.8(3) . . . . ?
 C25 C30 C29 C28 -0.1(4) . . . . ?
 C32 C31 C36 C35 1.1(3) . . . . ?
 C32 C33 C34 C35 1.1(4) . . . . ?
 C49 P2 C38 C37 -176.96(14) . . . . ?
 C49 P2 C38 C39 -1.40(18) . . . . ?
 C49 P2 C43 C44 -76.62(19) . . . . ?
 C49 P2 C43 C48 104.06(19) . . . . ?
 C49 C50 C51 C52 -1.9(4) . . . . ?
 C49 C54 C53 C52 -1.8(6) . . . . ?
 C26 O1 C37 C38 145.56(16) . . . . ?
 C26 O1 C37 C42 -35.8(2) . . . . ?
 C26 C25 C30 C29 0.9(3) . . . . ?
 C26 C27 C28 C29 -0.1(4) . . . . ?
 C19 P1 C25 C26 -164.37(16) . . . . ?
 C19 P1 C25 C30 9.4(2) . . . . ?
 C19 P1 C31 C32 85.81(17) . . . . ?
 C19 P1 C31 C36 -90.50(19) . . . . ?
 C19 C20 C21 C22 1.3(4) . . . . ?
 C19 C24 C23 C22 2.0(5) . . . . ?
 C7 C8 C9 C10 0.7(4) . . . . ?
 C7 C6 C5 N1 135.71(19) . . . . ?
 C7 C6 C5 C4 -48.2(3) . . . . ?
 C7 C12 C13 C14 2.2(3) . . . . ?
 C30 C25 C26 O1 -174.92(17) . . . . ?
 C30 C25 C26 C27 -1.2(3) . . . . ?
 C30 C29 C28 C27 -0.3(4) . . . . ?
 C43 P2 C38 C37 76.09(15) . . . . ?
 C43 P2 C38 C39 -108.35(17) . . . . ?
 C43 P2 C49 C50 -176.92(18) . . . . ?
 C43 P2 C49 C54 0.2(2) . . . . ?
 C43 C44 C45 C46 0.9(4) . . . . ?
 C43 C48 C47 C46 1.6(5) . . . . ?
 C37 O1 C26 C25 -76.5(2) . . . . ?
 C37 O1 C26 C27 109.5(2) . . . . ?
 C37 C38 C39 C40 0.8(3) . . . . ?
 C37 C42 C41 C40 1.2(3) . . . . ?
 C11 C12 C13 C14 -176.6(2) . . . . ?
 C5 N1 C1 C2 -2.2(3) . . . . ?
 C5 C6 C7 C8 -4.3(3) . . . . ?
 C5 C6 C7 C12 179.78(18) . . . . ?
 C5 C4 C3 C2 1.0(3) . . . . ?
 C5 C4 C3 C18 179.1(2) . . . . ?
 C5 C4 C15 C16 -179.1(2) . . . . ?
 C4 C3 C18 C17 -0.6(4) . . . . ?
 C2 C3 C18 C17 177.4(2) . . . . ?
 C12 C11 C10 C9 -0.8(4) . . . . ?
 C41 C40 C39 C38 -0.9(3) . . . . ?
 C50 C49 C54 C53 -0.9(4) . . . . ?
 C50 C51 C52 C53 -0.9(6) . . . . ?
 C39 C38 C37 O1 178.90(15) . . . . ?
 C39 C38 C37 C42 0.3(3) . . . . ?
 C39 C40 C41 C42 -0.1(3) . . . . ?
 C3 C4 C15 C16 -3.6(3) . . . . ?
 C3 C2 C1 N1 -4.1(4) . . . . ?
 C31 P1 C25 C26 89.43(17) . . . . ?
 C31 P1 C25 C30 -96.78(18) . . . . ?
 C31 P1 C19 C20 -154.35(17) . . . . ?
 C31 P1 C19 C24 25.0(2) . . . . ?
 C31 C32 C33 C34 -1.2(4) . . . . ?
 C31 C36 C35 C34 -1.2(4) . . . . ?
 C9 C8 C7 C6 -179.9(2) . . . . ?
 C9 C8 C7 C12 -4.0(3) . . . . ?
 C14 N2 C6 C7 5.9(3) . . . . ?
 C14 N2 C6 C5 -179.80(19) . . . . ?
 C20 C19 C24 C23 -0.7(4) . . . . ?
 C20 C21 C22 C23 -0.1(5) . . . . ?
 C16 C17 C18 C3 -1.8(4) . . . . ?
 C54 C49 C50 C51 2.7(4) . . . . ?
 C54 C53 C52 C51 2.7(7) . . . . ?
 C1 N1 C5 C6 -175.66(19) . . . . ?
 C1 N1 C5 C4 8.1(3) . . . . ?
 C1 C2 C3 C4 4.5(3) . . . . ?
 C1 C2 C3 C18 -173.6(2) . . . . ?
 C36 C35 C34 C33 0.0(4) . . . . ?
 C44 C43 C48 C47 -2.0(4) . . . . ?
 C44 C45 C46 C47 -1.4(4) . . . . ?
 C15 C4 C3 C2 -174.8(2) . . . . ?
 C15 C4 C3 C18 3.3(3) . . . . ?
 C15 C16 C17 C18 1.6(4) . . . . ?
 C10 C11 C12 C7 -2.6(4) . . . . ?
 C10 C11 C12 C13 176.1(2) . . . . ?
 C33 C32 C31 P1 -176.43(17) . . . . ?
 C33 C32 C31 C36 0.1(3) . . . . ?
 C24 C19 C20 C21 -0.9(4) . . . . ?
 C17 C16 C15 C4 1.2(4) . . . . ?
 C48 C43 C44 C45 0.8(3) . . . . ?
 C48 C47 C46 C45 0.2(5) . . . . ?
 C21 C22 C23 C24 -1.5(5) . . . . ?
 C57 O2 C55 C56 -178.2(6) . . . . ?
 C55 O2 C57 C58 175.1(6) . . . . ?

_shelx_res_file
;
TITL
    arn039_150k.res
    created by SHELXL-2018/3 at 15:27:28 on 09-Feb-2021
CELL 1.34143 11.4728 14.2115 16.0992 92.018 91.054 112.546
ZERR 2 0.0003 0.0004 0.0004 0.002 0.002 0.002
LATT 1
SFAC C H Cu F N O P
DISP C 0.0148 0.007 57.7477
DISP Cu -2.9183 3.6937 28015.7787
DISP F 0.06 0.0411 317.6292
DISP H -0 0 0.6481
DISP N 0.0253 0.0136 110.5121
DISP O 0.0412 0.025 193.9543
DISP P 0.2596 0.3354 2524.1876
UNIT 112 90 2 12 4 3 6
DFIX 1.41 O2 C57
SIMU O2 C58 C57 C55 C56
SADI 0.04 C58 O2 O2 C56
DFIX 1.42 O2 C55
SADI O2 C57 O2 C55
DFIX 1.48 C58 C57
DANG 2.37 O2 C58 O2 C56
DFIX 1.5 C55 C56
RIGU O2 C58 C57 C55 C56
SADI C58 C57 C55 C56

L.S. 15
PLAN  2
SIZE 0.18 0.203 0.23
TEMP -123.15
CONF
MORE -1
BOND $H
fmap 2
acta
OMIT -1 12 7
OMIT -8 -1 3
OMIT -3 14 8
OMIT -4 7 1
OMIT 5 -7 0
OMIT 1 -7 0
REM <olex2.extras>
REM <HklSrc "%./ARN039_150K.hkl">
REM </olex2.extras>

WGHT    0.084700    0.998000
EXTI    0.001319
FVAR       0.47208
CU1   3    0.103453    0.749277    0.764979    11.00000    0.02653    0.02331 =
         0.02335    0.00086   -0.00230    0.00492
P2    7    0.227823    0.758666    0.656715    11.00000    0.02148    0.02118 =
         0.02877    0.00137   -0.00055    0.00521
P1    7   -0.100535    0.719135    0.728931    11.00000    0.02388    0.02130 =
         0.02748   -0.00190    0.00209    0.00687
P3    7    0.257340    1.227245    0.767486    11.00000    0.03997    0.03422 =
         0.03343   -0.00060   -0.00558    0.01687
O1    6    0.000539    0.582791    0.626901    11.00000    0.02393    0.02395 =
         0.02756    0.00212    0.00067    0.00803
F3    4    0.328261    1.274312    0.685599    11.00000    0.05231    0.06640 =
         0.05351    0.00607    0.01392    0.00906
F1    4    0.149976    1.267866    0.746371    11.00000    0.05495    0.08680 =
         0.05292    0.01627    0.00030    0.04404
F6    4    0.335741    1.331915    0.818885    11.00000    0.07473    0.04612 =
         0.06740   -0.02088   -0.02120    0.02717
F5    4    0.186883    1.179029    0.849048    11.00000    0.09569    0.08246 =
         0.04123    0.02401    0.00735    0.03326
F4    4    0.182143    1.122988    0.716394    11.00000    0.06951    0.04671 =
         0.06415   -0.01296   -0.01462    0.00394
N1    5    0.098427    0.636533    0.851375    11.00000    0.04019    0.02166 =
         0.03039    0.00018   -0.00525    0.00884
F2    4    0.367057    1.188461    0.789478    11.00000    0.08362    0.07676 =
         0.08714   -0.02288   -0.03245    0.05872
C38   1    0.127940    0.732797    0.562557    11.00000    0.02617    0.02432 =
         0.02634   -0.00018    0.00125    0.01255
N2    5    0.163542    0.838149    0.872485    11.00000    0.03889    0.02223 =
         0.02932   -0.00032   -0.00706    0.00472
C8    1    0.124257    0.759533    1.092088    11.00000    0.03229    0.03470 =
         0.03519    0.00421    0.00377    0.01053
AFIX  43
H8    2    0.119415    0.691338    1.086683    11.00000   -1.20000
AFIX   0
C6    1    0.162446    0.785517    0.939163    11.00000    0.02957    0.02306 =
         0.02636    0.00010   -0.00489    0.00490
C25   1   -0.182578    0.583217    0.700496    11.00000    0.02518    0.02264 =
         0.02830   -0.00158    0.00038    0.00549
C32   1   -0.063946    0.891035    0.642843    11.00000    0.03998    0.03288 =
         0.05282    0.00765    0.01230    0.01948
AFIX  43
H32   2    0.003006    0.922567    0.682815    11.00000   -1.20000
AFIX   0
C49   1    0.355667    0.880291    0.639056    11.00000    0.02714    0.02283 =
         0.03636   -0.00234    0.00636    0.00325
C26   1   -0.122034    0.531576    0.653579    11.00000    0.02493    0.02192 =
         0.02617    0.00050   -0.00049    0.00531
C40   1    0.061148    0.773406    0.429582    11.00000    0.05495    0.04035 =
         0.02957    0.00765    0.00461    0.02759
AFIX  43
H40   2    0.075981    0.817906    0.384812    11.00000   -1.20000
AFIX   0
C19   1   -0.196938    0.739576    0.811344    11.00000    0.03316    0.02707 =
         0.04315   -0.00832    0.01235    0.00383
C7    1    0.146465    0.820239    1.020986    11.00000    0.02761    0.02738 =
         0.03008   -0.00178   -0.00234    0.00580
C30   1   -0.300899    0.525258    0.730595    11.00000    0.02892    0.03215 =
         0.03995   -0.00182    0.00758    0.00634
AFIX  43
H30   2   -0.344724    0.558341    0.761946    11.00000   -1.20000
AFIX   0
C43   1    0.303865    0.667253    0.644461    11.00000    0.02207    0.02306 =
         0.05081    0.00432   -0.00481    0.00595
C37   1    0.016842    0.645075    0.559827    11.00000    0.02472    0.02511 =
         0.02266    0.00045    0.00270    0.01124
C11   1    0.131699    0.958393    1.110162    11.00000    0.05492    0.03730 =
         0.04450   -0.00918    0.00234    0.01772
AFIX  43
H11   2    0.134183    1.025811    1.117031    11.00000   -1.20000
AFIX   0
C5    1    0.166488    0.683040    0.919100    11.00000    0.03122    0.02413 =
         0.02658    0.00319    0.00127    0.00603
C4    1    0.241438    0.640575    0.963910    11.00000    0.03292    0.03241 =
         0.02824    0.00685    0.00307    0.01143
C27   1   -0.175690    0.427081    0.638791    11.00000    0.03877    0.02510 =
         0.03972   -0.00588    0.00392    0.00825
AFIX  43
H27   2   -0.132608    0.393354    0.607447    11.00000   -1.20000
AFIX   0
C42   1   -0.069854    0.620575    0.493911    11.00000    0.02932    0.03831 =
         0.02887   -0.00252   -0.00146    0.01333
AFIX  43
H42   2   -0.143783    0.559800    0.493028    11.00000   -1.20000
AFIX   0
C2    1    0.146262    0.489488    0.872174    11.00000    0.05665    0.02407 =
         0.04251    0.00217    0.00225    0.01463
AFIX  43
H2    2    0.131708    0.420602    0.856964    11.00000   -1.20000
AFIX   0
C29   1   -0.355790    0.420365    0.715667    11.00000    0.03241    0.03139 =
         0.04806    0.00209    0.00907   -0.00182
AFIX  43
H29   2   -0.436271    0.382250    0.736781    11.00000   -1.20000
AFIX   0
C12   1    0.145019    0.919760    1.030102    11.00000    0.03660    0.02948 =
         0.03568   -0.00366   -0.00450    0.00932
C41   1   -0.047031    0.686432    0.428854    11.00000    0.04580    0.05275 =
         0.02768   -0.00067   -0.00561    0.02866
AFIX  43
H41   2   -0.106602    0.671232    0.383575    11.00000   -1.20000
AFIX   0
C50   1    0.331524    0.969131    0.647814    11.00000    0.03494    0.02671 =
         0.04676    0.00167    0.00960    0.00918
AFIX  43
H50   2    0.249880    0.964801    0.662557    11.00000   -1.20000
AFIX   0
C39   1    0.148909    0.796496    0.495558    11.00000    0.03893    0.02791 =
         0.03042    0.00584    0.00707    0.01625
AFIX  43
H39   2    0.223964    0.856242    0.495087    11.00000   -1.20000
AFIX   0
C3    1    0.229515    0.540111    0.939582    11.00000    0.04511    0.03486 =
         0.03708    0.00959    0.00602    0.01840
C31   1   -0.136205    0.786282    0.644400    11.00000    0.03144    0.03071 =
         0.03601    0.00030    0.00231    0.01795
C9    1    0.109951    0.798975    1.167772    11.00000    0.05009    0.05036 =
         0.03503    0.00730    0.01136    0.01776
AFIX  43
H9    2    0.096114    0.758170    1.214921    11.00000   -1.20000
AFIX   0
C14   1    0.160554    0.933008    0.882380    11.00000    0.05411    0.02077 =
         0.03599    0.00170   -0.01014    0.00662
AFIX  43
H14   2    0.162776    0.970585    0.834374    11.00000   -1.20000
AFIX   0
C20   1   -0.157893    0.736328    0.893101    11.00000    0.06564    0.02869 =
         0.03993   -0.00253    0.02230    0.00532
AFIX  43
H20   2   -0.084773    0.722221    0.904322    11.00000   -1.20000
AFIX   0
C16   1    0.402016    0.649835    1.066413    11.00000    0.03843    0.07074 =
         0.03507    0.00854   -0.00063    0.02570
AFIX  43
H16   2    0.461670    0.686688    1.109338    11.00000   -1.20000
AFIX   0
C54   1    0.477344    0.888195    0.620883    11.00000    0.03565    0.02621 =
         0.08281   -0.01083    0.02144    0.00465
AFIX  43
H54   2    0.495656    0.828541    0.615474    11.00000   -1.20000
AFIX   0
C51   1    0.425205    1.063476    0.635259    11.00000    0.05700    0.02381 =
         0.06487   -0.00162    0.02294    0.00782
AFIX  43
H51   2    0.407265    1.123364    0.639741    11.00000   -1.20000
AFIX   0
C1    1    0.087021    0.539771    0.829133    11.00000    0.04887    0.02241 =
         0.03811   -0.00236   -0.00502    0.00861
AFIX  43
H1    2    0.035562    0.506252    0.781625    11.00000   -1.20000
AFIX   0
C36   1   -0.233622    0.741537    0.585350    11.00000    0.04465    0.04610 =
         0.04482   -0.00462   -0.00826    0.02663
AFIX  43
H36   2   -0.284335    0.670786    0.586275    11.00000   -1.20000
AFIX   0
C44   1    0.329598    0.636309    0.566337    11.00000    0.03540    0.03603 =
         0.06145   -0.01362   -0.01291    0.01929
AFIX  43
H44   2    0.309245    0.664181    0.518017    11.00000   -1.20000
AFIX   0
C15   1    0.332513    0.695469    1.026940    11.00000    0.03198    0.04617 =
         0.03079    0.00308    0.00063    0.01315
AFIX  43
H15   2    0.345239    0.764094    1.041756    11.00000   -1.20000
AFIX   0
C10   1    0.115443    0.899844    1.176997    11.00000    0.06265    0.05606 =
         0.03657   -0.00599    0.00974    0.02313
AFIX  43
H10   2    0.107676    0.926838    1.230489    11.00000   -1.20000
AFIX   0
C33   1   -0.089828    0.948520    0.583358    11.00000    0.06532    0.04803 =
         0.07072    0.02492    0.02434    0.03912
AFIX  43
H33   2   -0.041606    1.019791    0.583202    11.00000   -1.20000
AFIX   0
C28   1   -0.293162    0.371776    0.670151    11.00000    0.04381    0.02154 =
         0.05482   -0.00367    0.00652   -0.00129
AFIX  43
H28   2   -0.330521    0.299934    0.660113    11.00000   -1.20000
AFIX   0
C13   1    0.154531    0.975778    0.958150    11.00000    0.05371    0.02267 =
         0.04287   -0.00432   -0.00999    0.01163
AFIX  43
H13   2    0.156719    1.043270    0.962680    11.00000   -1.20000
AFIX   0
C35   1   -0.256922    0.800223    0.524931    11.00000    0.06498    0.08707 =
         0.04799   -0.00168   -0.01289    0.05364
AFIX  43
H35   2   -0.322563    0.769234    0.483989    11.00000   -1.20000
AFIX   0
C24   1   -0.305240    0.758918    0.795540    11.00000    0.03877    0.06800 =
         0.08376   -0.02881    0.01261    0.02034
AFIX  43
H24   2   -0.332540    0.762151    0.740030    11.00000   -1.20000
AFIX   0
C17   1    0.386353    0.549269    1.044326    11.00000    0.05923    0.07430 =
         0.04779    0.01607   -0.00080    0.04285
AFIX  43
H17   2    0.433939    0.518143    1.073355    11.00000   -1.20000
AFIX   0
C34   1   -0.185085    0.903214    0.524254    11.00000    0.07717    0.07701 =
         0.05631    0.02555    0.01715    0.05936
AFIX  43
H34   2   -0.201360    0.943059    0.482870    11.00000   -1.20000
AFIX   0
C48   1    0.335633    0.626810    0.714091    11.00000    0.03473    0.06368 =
         0.06926    0.03089    0.00672    0.02542
AFIX  43
H48   2    0.321304    0.648661    0.768014    11.00000   -1.20000
AFIX   0
C45   1    0.384869    0.564914    0.558393    11.00000    0.03816    0.04280 =
         0.09976   -0.02341   -0.01491    0.02219
AFIX  43
H45   2    0.403242    0.544947    0.504880    11.00000   -1.20000
AFIX   0
C18   1    0.303674    0.495858    0.981733    11.00000    0.06991    0.05069 =
         0.05105    0.01480    0.00683    0.03799
AFIX  43
H18   2    0.295718    0.428484    0.966262    11.00000   -1.20000
AFIX   0
C21   1   -0.225971    0.753760    0.958639    11.00000    0.09886    0.03565 =
         0.05422   -0.00515    0.04503    0.00314
AFIX  43
H21   2   -0.197938    0.752912    1.014398    11.00000   -1.20000
AFIX   0
C53   1    0.571545    0.983212    0.610721    11.00000    0.04253    0.03426 =
         0.14019   -0.01690    0.04731   -0.00187
AFIX  43
H53   2    0.654958    0.988624    0.599934    11.00000   -1.20000
AFIX   0
C52   1    0.544901    1.070099    0.616181    11.00000    0.05859    0.02542 =
         0.11645   -0.01334    0.04828   -0.00567
AFIX  43
H52   2    0.609134    1.134622    0.606780    11.00000   -1.20000
AFIX   0
C47   1    0.388870    0.553714    0.704993    11.00000    0.04781    0.08308 =
         0.12163    0.05674    0.01303    0.04030
AFIX  43
H47   2    0.408644    0.524783    0.752888    11.00000   -1.20000
AFIX   0
C22   1   -0.332120    0.771949    0.943270    11.00000    0.08342    0.04740 =
         0.09639   -0.02649    0.06381   -0.00674
AFIX  43
H22   2   -0.377973    0.783604    0.988316    11.00000   -1.20000
AFIX   0
C46   1    0.412782    0.523421    0.627787    11.00000    0.03849    0.04204 =
         0.13931    0.01564    0.00184    0.02516
AFIX  43
H46   2    0.448794    0.473544    0.622284    11.00000   -1.20000
AFIX   0
C23   1   -0.373490    0.773569    0.862861    11.00000    0.04754    0.08438 =
         0.13036   -0.04432    0.03418    0.01701
AFIX  43
H23   2   -0.448940    0.784702    0.852746    11.00000   -1.20000
AFIX   0

PART -1
O2    6    0.481363    0.962608    0.986519    10.50000    0.06366
C58   1    0.493014    0.954225    0.839751    10.50000    0.08944
AFIX   3
H58A  2    0.557104    0.926535    0.843721    10.50000   -1.50000
H58B  2    0.411433    0.899555    0.834531    10.50000   -1.50000
H58C  2    0.506304    0.994975    0.791841    10.50000   -1.50000
AFIX   0
C57   1    0.499935    1.017089    0.913012    10.50000    0.06549
AFIX   3
H57A  2    0.582445    1.072309    0.917352    10.50000   -1.20000
H57B  2    0.435255    1.045049    0.908062    10.50000   -1.20000
AFIX   0
C55   1    0.497539    1.022776    1.058431    10.50000    0.07218
AFIX   3
H55A  2    0.435549    1.053807    1.057681    10.50000   -1.20000
H55B  2    0.581789    1.075727    1.060421    10.50000   -1.20000
AFIX   0
C56   1    0.481167    0.963503    1.136496    10.50000    0.07624
AFIX   3
H56A  2    0.402097    0.905933    1.132396    10.50000   -1.50000
H56B  2    0.548997    0.940133    1.142096    10.50000   -1.50000
H56C  2    0.482197    1.006253    1.184256    10.50000   -1.50000
AFIX   0
HKLF 4


REM
REM wR2 = 0.1269, GooF = S = 1.032, Restrained GooF = 1.033 for all data
REM R1 = 0.0457 for 9750 Fo > 4sig(Fo) and 0.0468 for all 10023 data
REM 625 parameters refined using 13 restraints

END

WGHT      0.0846      0.9962

REM Highest difference peak  0.652,  deepest hole -0.517,  1-sigma level  0.069
Q1    1   0.1818  0.7513  0.6059  11.00000  0.05    0.65
Q2    1   0.4153  0.9526  1.1732  11.00000  0.05    0.62
;
_shelx_res_checksum                70870
_shelx_hkl_file
;
   0   9 -11   55.64    0.66   1
   1   8  -9    0.79    0.50   1
   7  -3 -17    0.91    0.51   1
   7   0 -11    4.48    0.70   1
   4   4 -18    1.54    0.54   1
   5   3 -17    0.35    0.61   1
   5   4 -14    3.63    0.72   1
   5   4 -11    7.95    0.73   1
   6   2 -15    2.35    0.68   1
   7  -1  -9   46.40    0.68   1
   2   7 -16   12.04    0.65   1
   6   2 -10  144.59    0.89   1
   1   7 -18    2.06    0.51   1
   1   8 -10  185.29    0.91   1
   2   7  -9  139.24    0.83   1
   4   5 -15   14.58    0.72   1
   6   2 -11    3.91    0.72   1
   3   5 -18    0.77    0.58   1
   4   3 -19   16.65    0.54   1
   4   5 -10    4.19    0.58   1
   6  -1  -6    1.66    0.37   1
   6   1 -16   22.10    0.72   1
   6   2 -13    1.87    0.64   1
   6   2 -12  119.63    0.96   1
   1   8 -11    0.81    0.61   1
   2   7 -15   33.55    0.74   1
   4   5 -11    0.30    0.70   1
   2   7 -10    8.78    0.55   1
   4   5 -12    6.91    0.64   1
   5   3  -9    6.65    0.62   1
   6  -1 -18    2.60    0.56   1
   2   7 -14   97.16    0.89   1
   3   4 -19    0.53    0.51   1
   5   3 -15   29.57    0.79   1
   1   7 -17   13.83    0.64   1
   2   7 -12    2.80    0.69   1
   4   4  -8    0.17    0.44   1
   5   2 -17   36.29    0.73   1
   7  -2 -14    8.56    0.66   1
   2   6 -17    2.92    0.62   1
   4   3 -18    4.69    0.59   1
   5   3 -14    6.23    0.77   1
   6  -2 -18    1.16    0.52   1
   6   1 -13  236.69    1.19   1
   6   1 -11    6.55    0.74   1
   3   5  -8    5.12    0.51   1
   4   2 -19   19.97    0.55   1
   6  -3 -18    7.98    0.51   1
   5   2 -16    0.75    0.69   1
   7  -3 -13    3.02    0.63   1
   0   8 -14    1.60    0.64   1
   0   8 -10   39.94    0.61   1
   4   3 -17    1.28    0.57   1
   4   4 -14    0.75    0.65   1
   6  -1 -16   22.98    0.72   1
   0   8 -11   12.26    0.67   1
   1   7 -15   19.14    0.76   1
   3   3 -19    6.21    0.56   1
   4   4 -13   50.17    0.84   1
   4   4 -12    1.28    0.70   1
   5   2 -15    1.77    0.65   1
   0   8 -12   36.39    0.72   1
   4   2 -18    3.10    0.63   1
   6  -3 -17    0.28    0.65   1
  -1   8 -16   11.61    0.63   1
   0   6 -19    5.14    0.53   1
   0   7 -17    3.63    0.60   1
   1   7 -14   52.00    0.82   1
   1   7 -10    5.99    0.58   1
   3   4 -17   31.87    0.75   1
   3   5 -14   18.15    0.77   1
   3   5 -10   17.99    0.60   1
   4   1 -19   29.34    0.63   1
   4   3 -16   21.85    0.79   1
   5   2 -14    3.28    0.66   1
   5   2 -10   23.90    0.60   1
   2   4 -19    2.20    0.59   1
   3   4  -7    6.66    0.43   1
   5   1 -16   34.00    0.81   1
   5   2 -12    5.19    0.74   1
   5   2 -11   16.12    0.70   1
  -1   7 -18   10.71    0.60   1
   1   7 -12    1.92    0.69   1
   1   7 -11  100.48    0.82   1
   5  -1 -18    2.31    0.60   1
  -1   8 -15    5.43    0.69   1
   4   3 -15    2.68    0.78   1
   6  -1 -14   86.34    0.90   1
   3   3 -18    5.17    0.66   1
   4   2 -17   30.76    0.76   1
   5   1 -15   63.14    0.89   1
   6  -3 -16   17.29    0.66   1
   6  -1 -13  139.78    0.98   1
   3   2 -19   29.32    0.65   1
   4   0 -19    6.20    0.59   1
   4   3 -14  215.59    1.16   1
   6  -2 -15   33.63    0.77   1
  -1   8 -14    6.06    0.62   1
   0   6 -18    2.78    0.62   1
   1   6 -16   20.83    0.76   1
   2   5 -16    0.50    0.79   1
   5   1 -14   46.12    0.84   1
   6  -4 -16    0.90    0.62   1
  -1   6 -19   34.82    0.64   1
  -1   8 -10    8.41    0.51   1
   3   4 -15  128.45    1.04   1
   4   3 -12   38.02    0.79   1
   5   0 -16   38.62    0.84   1
   5   1 -10   19.49    0.65   1
   6  -2 -14   13.66    0.74   1
   6  -2  -9   15.89    0.54   1
  -1   7 -17    8.61    0.73   1
  -1   8 -13    2.74    0.63   1
  -1   8 -11    5.22    0.58   1
   0   7 -15    3.24    0.70   1
   3   3 -17   26.55    0.78   1
   4   2 -16    3.38    0.66   1
   5  -3 -18    3.86    0.64   1
   5   1 -13   31.77    0.80   1
   5   1 -11   63.88    0.80   1
   6  -3 -15   18.90    0.72   1
  -2   7 -18    1.83    0.57   1
  -1   8 -12   63.09    0.70   1
   2   2 -20   26.73    0.57   1
   2   3 -19   35.39    0.68   1
   5   1 -12   65.70    0.76   1
   0   5 -19    5.77    0.59   1
   0   7 -14   29.69    0.77   1
   1   6 -15   40.41    0.84   1
   4   1 -17   19.84    0.78   1
   5  -4 -18   60.93    0.66   1
   6  -5 -15    9.92    0.69   1
   6  -2 -11   17.42    0.68   1
   1   4 -19   24.73    0.61   1
   2   4 -17   12.89    0.75   1
   3   1 -19   25.32    0.66   1
   4   2 -15   12.10    0.70   1
   6  -3 -14    8.76    0.70   1
   0   7 -13    3.42    0.70   1
   0   7 -10    8.83    0.54   1
   1   6 -14   37.77    0.85   1
   3   3 -16   12.89    0.79   1
   3   4 -12    5.05    0.61   1
   4  -2 -19    3.58    0.64   1
  -1   7 -16    2.67    0.67   1
   2   5 -13  101.08    0.94   1
   4   2 -14   43.89    0.87   1
   4   2  -9  363.68    1.05   1
   5   0 -14    0.42    0.69   1
   6  -3 -13   51.86    0.76   1
  -2   8 -14    3.54    0.68   1
  -1   6 -18   63.46    0.77   1
   1   6 -13  112.02    0.93   1
   4   1 -16   17.19    0.80   1
   5  -3 -17   -0.06    0.62   1
   5   0 -13   46.38    0.84   1
   6  -5 -14   13.56    0.65   1
   6  -4  -9    0.19    0.44   1
   6  -3 -12    4.68    0.62   1
   6  -3 -11   39.23    0.66   1
   1   6 -12  153.96    0.95   1
   1   6 -11   57.00    0.73   1
   2   1 -20    1.10    0.54   1
   2   3 -18    0.95    0.61   1
   2   4 -16   95.11    0.95   1
   4  -3 -19   83.40    0.72   1
   5   0 -12  238.24    1.10   1
   5   0 -10    1.49    0.60   1
  -2   8 -13   15.93    0.66   1
   0   5 -18   79.10    0.90   1
   0   6 -16    0.60    0.74   1
   3   2 -17    3.45    0.74   1
   3   3 -15   91.59    0.88   1
   4   2 -12   13.36    0.63   1
   4   2 -11  108.30    0.83   1
   5  -5 -17   16.27    0.64   1
  -1   7 -15    2.63    0.70   1
   3   0 -19   22.04    0.62   1
   6  -4 -12  108.36    0.79   1
   6  -4 -11    1.01    0.53   1
  -1   5 -19   24.27    0.67   1
   1   2 -20   20.90    0.57   1
   1   3 -19   63.56    0.71   1
   2   4 -15    1.91    0.77   1
   4  -2 -18    9.88    0.68   1
   5  -3 -16    6.60    0.73   1
  -1   7 -14   16.15    0.72   1
   0   3 -20   13.06    0.61   1
   0   6 -15   54.06    0.84   1
   2   0 -20   26.25    0.64   1
   3   2 -16   52.57    0.91   1
   3   3 -13  298.02    1.21   1
   4   0 -16   56.11    0.90   1
   4   1 -14   17.24    0.80   1
   5  -1  -9  204.64    0.82   1
  -3   7 -17   42.69    0.74   1
  -2   6 -18   31.66    0.75   1
   2   4  -8   11.15    0.44   1
   3  -1 -19   49.09    0.75   1
   5  -1 -10   12.64    0.59   1
   0   5 -17    2.39    0.77   1
   1   4 -17   19.67    0.82   1
   2   1 -19   14.67    0.69   1
   2   2 -18  141.58    0.99   1
   3   3 -11  370.21    1.13   1
   4  -3 -18   25.73    0.70   1
   4   1 -13  134.33    0.96   1
   5  -5 -16    7.73    0.65   1
   0   6 -14    4.84    0.72   1
   1   5  -8    0.65    0.38   1
   3   0 -18    4.91    0.72   1
   4  -5 -18   38.91    0.65   1
   4  -4 -18   86.36    0.82   1
   5  -3 -15   21.27    0.75   1
   5  -2 -14    3.74    0.73   1
  -2   5 -19   33.68    0.71   1
  -1   7 -11   69.06    0.69   1
   1   1 -20    6.18    0.59   1
   2  -1 -20    3.89    0.59   1
   2   3 -16    6.31    0.82   1
   2   4 -13   75.38    0.79   1
   3   2 -15   15.04    0.72   1
   4   0 -15   57.91    0.88   1
  -2   7 -15    8.09    0.68   1
  -1   5 -18    8.61    0.70   1
  -1   6 -16   17.11    0.80   1
   0   6 -13   24.01    0.73   1
   0   6  -9  134.85    0.69   1
   1   3 -18    4.16    0.73   1
   2   4 -12    9.26    0.70   1
   2   4 -11   27.56    0.68   1
   2   4 -10    6.85    0.56   1
   4  -2 -17    3.20    0.73   1
   5  -2 -13   50.09    0.79   1
   1   2 -19    2.03    0.57   1
   1   4 -16   11.40    0.84   1
   5  -4 -15    9.48    0.68   1
   5  -2  -9   73.44    0.59   1
  -3   6 -18   32.72    0.66   1
   0   2 -20   20.11    0.62   1
   0   3 -19    0.10    0.69   1
   0   5 -16   20.41    0.83   1
   0   6 -11   41.91    0.67   1
   2   0 -19    5.19    0.67   1
   2   2 -17   27.55    0.85   1
   3  -3 -19   71.21    0.77   1
   3  -1 -18    3.55    0.74   1
   3   1 -16   24.31    0.83   1
   4   0 -14  164.21    1.08   1
   5  -5 -15   51.18    0.72   1
   5  -3 -14   21.97    0.76   1
   5  -2 -12   12.41    0.67   1
   5  -2 -10    2.10    0.53   1
   2   1 -18    2.60    0.76   1
   2   3 -15  109.07    0.98   1
   3  -4 -19   50.18    0.67   1
   3   0 -17  113.73    1.00   1
   4  -3 -17    1.97    0.73   1
   5  -2 -11    3.77    0.51   1
  -2   7 -14    3.58    0.67   1
  -1   6 -15    2.80    0.74   1
   1   0 -20   13.63    0.60   1
   4   0 -13   11.21    0.76   1
   5  -4 -14    8.45    0.74   1
   5  -3 -13   16.69    0.72   1
  -3   5 -19    4.37    0.58   1
   1   3 -17   22.31    0.84   1
   1   4 -15    9.76    0.86   1
   3   2 -12    3.41    0.66   1
   3   2  -9  176.49    0.75   1
   4  -6 -17   41.73    0.66   1
   4  -4 -17    2.81    0.66   1
   4  -2 -16   13.57    0.80   1
   0   5 -15   12.15    0.82   1
   2   3 -14  197.81    1.10   1
   4   0 -12   30.66    0.76   1
   5  -5 -14    7.67    0.63   1
   5  -3 -12   31.12    0.68   1
  -3   7 -15   55.19    0.79   1
  -2   5 -18   35.82    0.77   1
  -2   7 -13  204.25    0.97   1
   1   1 -19   27.42    0.73   1
   1   2 -18   55.00    0.88   1
   2  -1 -19   29.63    0.74   1
   2   2 -16   91.65    0.97   1
   4   0 -11   99.71    0.78   1
   4   0 -10   25.75    0.57   1
   5  -4 -13  227.11    1.04   1
   5  -3 -11   17.32    0.58   1
  -2   6 -16   32.63    0.79   1
  -1   6 -14    1.63    0.72   1
   0   1 -20    9.39    0.52   1
   1  -1 -20    2.83    0.59   1
   1   4 -14   69.84    0.90   1
   2   3 -13  262.60    1.12   1
   3  -1 -17   21.89    0.83   1
   3   0 -16   46.84    0.90   1
   4  -3 -16  132.34    0.96   1
   5  -3 -10   75.12    0.63   1
  -3   6 -17   -0.42    0.68   1
  -2   4 -19   16.39    0.68   1
  -2   7 -12  196.85    0.90   1
  -1   2 -20   69.79    0.73   1
   0   2 -19   41.61    0.75   1
   0   3 -18   45.41    0.88   1
   0   5 -14    5.88    0.76   1
   3  -3 -18   24.07    0.73   1
   3   1 -14   24.97    0.81   1
   4  -2 -15  118.08    0.99   1
   5  -5 -13    7.49    0.67   1
  -2   7 -11  135.06    0.75   1
  -2   7 -10  114.90    0.66   1
  -1   6 -13    5.15    0.76   1
   3  -6 -18    7.09    0.56   1
   5  -4 -12    1.59    0.58   1
  -1   5 -16    7.28    0.77   1
   1  -2 -20   21.29    0.62   1
   1   4 -13    2.23    0.75   1
   2   2 -15   12.22    0.80   1
   2   3 -11  112.51    0.80   1
   3  -5 -18   52.76    0.75   1
   3  -4 -18   65.28    0.79   1
   4  -4 -16    6.57    0.70   1
   5  -4 -11   18.36    0.56   1
   5  -4  -9    4.79    0.40   1
  -3   7 -14   46.85    0.70   1
   0   0 -20   23.18    0.61   1
   0   5 -13  134.83    0.93   1
   1   0 -19   16.60    0.73   1
   3   0 -15   41.07    0.85   1
   3   1 -13  515.33    1.36   1
   4  -6 -16    8.09    0.64   1
   4  -5 -16  115.44    0.87   1
   5  -5 -12   55.03    0.64   1
   5  -4 -10   14.80    0.48   1
  -3   5 -18    7.63    0.66   1
  -2   6 -15    5.24    0.73   1
  -1   6 -12   13.84    0.64   1
   0   5  -8   20.40    0.40   1
   1   1 -18   27.52    0.79   1
   1   2 -17    5.34    0.79   1
   1   4 -12  345.57    1.16   1
   2  -3 -19   22.31    0.66   1
   3  -1 -16   65.97    0.93   1
   4  -3 -15   11.63    0.77   1
   4  -2 -14   14.01    0.77   1
  -4   6 -17    2.94    0.70   1
  -3   4 -19    1.36    0.62   1
  -1   6 -11   29.32    0.60   1
   0   5 -12    4.30    0.65   1
   1   3 -15    1.97    0.78   1
   2  -4 -19   13.94    0.62   1
   2  -1 -18    8.54    0.69   1
   2   1 -16    8.66    0.81   1
   5  -5 -11    1.44    0.51   1
  -3   6 -16   28.46    0.76   1
  -3   7 -13  251.46    1.03   1
  -1   1 -20    8.00    0.60   1
  -1   5 -15    1.56    0.76   1
   0   3 -17    0.75    0.81   1
   0   5 -11  569.79    1.28   1
   0   5  -9    6.03    0.44   1
   1   4 -10  769.69    1.36   1
   2   0 -17   35.81    0.86   1
   2   2 -14   56.77    0.77   1
   3   1 -11  331.16    1.06   1
  -2   4 -18   55.60    0.81   1
   0  -1 -20    7.88    0.56   1
   0   1 -19    0.00    0.60   1
   0   2 -18    0.08    0.75   1
   1  -1 -19   47.90    0.76   1
   3  -3 -17   34.27    0.80   1
   3   0 -14   41.15    0.83   1
   3   1 -10  152.52    0.72   1
   4  -4 -15  126.05    0.94   1
   4  -2 -13   21.50    0.75   1
  -4   5 -18    4.13    0.68   1
  -2   6 -14    4.65    0.73   1
  -1   2 -19    5.14    0.72   1
  -1   3 -18   38.01    0.85   1
   2  -2 -18   15.40    0.79   1
   2   2 -13   64.29    0.81   1
   4  -5 -15    2.61    0.75   1
   4  -3 -14  145.10    0.95   1
  -4   4 -19    5.46    0.56   1
  -3   7 -12   55.60    0.65   1
   1   2 -16    7.79    0.84   1
   1   3 -14   56.30    0.86   1
   2   1 -15   95.13    0.95   1
   3  -6 -17   36.83    0.72   1
   3  -4 -17   21.12    0.75   1
   3  -1 -15  257.44    1.23   1
   4  -6 -15  187.08    0.94   1
  -2   5 -16    1.28    0.77   1
   0  -2 -20   -0.02    0.57   1
   1   0 -18   34.60    0.85   1
   3  -5 -17   42.05    0.73   1
   3   0 -13    3.43    0.71   1
   4  -2 -12   66.90    0.69   1
  -5   5 -18   19.40    0.64   1
  -3   5 -17   11.50    0.73   1
  -3   7 -11  552.47    1.20   1
  -1   0 -20   82.77    0.74   1
  -1   5 -14    8.67    0.66   1
   0   3 -16    6.48    0.80   1
   1  -2 -19   24.12    0.74   1
   2  -1 -17   16.57    0.81   1
   2   0 -16   74.94    0.96   1
   2   2 -12  172.47    0.86   1
   4  -4 -14  100.92    0.87   1
   4  -2 -11    6.22    0.56   1
  -4   6 -16   70.44    0.82   1
  -3   6 -15   -0.40    0.69   1
  -2   1 -20    1.55    0.60   1
  -2   6 -13    1.26    0.64   1
   0   0 -19   64.75    0.83   1
   1   3 -13  121.41    0.90   1
   2  -6 -18   16.98    0.62   1
   2   2 -11  442.28    1.16   1
   4  -3 -13  116.73    0.87   1
  -3   3 -19   34.87    0.70   1
  -3   4 -18   25.13    0.76   1
   2  -4 -18   43.45    0.77   1
   2   1 -14  116.63    0.94   1
   2   2 -10  441.40    1.07   1
   2   2  -9  261.26    0.82   1
   3  -3 -16  169.78    0.99   1
   3  -1 -14   89.29    0.94   1
   3   0 -12   72.52    0.71   1
   4  -5 -14  106.85    0.91   1
  -2   4 -17    6.01    0.81   1
  -2   6 -12   32.02    0.69   1
  -1  -1 -20    6.57    0.56   1
  -1   1 -19   70.23    0.84   1
  -1   5 -13   34.62    0.77   1
   0   1 -18   21.18    0.82   1
   0   2 -17    9.47    0.73   1
   1  -4 -19   10.86    0.62   1
   1   2 -15   49.88    0.79   1
   2  -5 -18    7.18    0.65   1
   4  -6 -14    8.01    0.61   1
  -2   2 -19    0.64    0.70   1
  -2   5 -15  103.93    0.96   1
  -1   3 -17    4.24    0.84   1
   1  -1 -18   27.36    0.81   1
   1   3 -12  183.46    0.93   1
   3  -4 -16   24.48    0.82   1
   3   0 -11    4.85    0.50   1
   4  -4 -13   47.04    0.73   1
   4  -3 -12   68.35    0.74   1
  -4   5 -17   13.49    0.79   1
  -3   6 -14  162.30    1.01   1
  -1   2 -18   96.44    0.87   1
   0  -1 -19    2.27    0.70   1
   0   3 -15   10.61    0.80   1
   1   1 -16   19.28    0.87   1
   2   0 -15    4.96    0.81   1
   3  -5 -16  175.81    1.05   1
   3   0 -10    8.60    0.43   1
  -4   3 -19   20.59    0.65   1
  -3   5 -16   57.68    0.92   1
  -2   6 -11   25.08    0.56   1
  -1   5 -12  111.41    0.80   1
   1   0 -17    5.13    0.71   1
   2   1 -13  452.92    1.31   1
   3  -6 -16   45.52    0.75   1
   3  -1 -13  243.06    1.08   1
   4  -3 -11    4.28    0.54   1
  -4   4 -18   75.65    0.83   1
  -4   6 -15    7.33    0.74   1
  -2   6 -10    3.46    0.45   1
  -2   6  -9    7.82    0.38   1
   1   2 -14   39.03    0.81   1
   1   3 -10    5.64    0.48   1
   1   3  -9  168.31    0.69   1
   3  -3 -15  346.09    1.28   1
   4  -5 -13    8.13    0.64   1
   4  -3 -10    8.55    0.48   1
  -1   0 -19    3.93    0.69   1
  -1   5 -11  121.61    0.75   1
   0  -2 -19   48.87    0.79   1
   0   0 -18    7.57    0.80   1
   0   2 -16    0.46    0.82   1
   1  -2 -18   13.43    0.70   1
   2  -7 -17   32.99    0.66   1
   4  -6 -13   17.93    0.62   1
   4  -4 -12  177.78    0.88   1
   4  -3  -9    0.68    0.38   1
  -5   5 -17   -0.54    0.70   1
  -2   4 -16   32.02    0.86   1
  -2   5 -14    6.51    0.74   1
   0   1 -17    0.99    0.81   1
   2  -4 -17   16.99    0.75   1
   2   1 -12    1.29    0.53   1
   3  -1 -12    3.66    0.63   1
  -5   4 -18    6.74    0.63   1
  -3   4 -17    0.50    0.75   1
  -3   6 -13   59.81    0.75   1
  -2   1 -19   82.52    0.85   1
  -1   3 -16   14.16    0.87   1
  -1   5 -10  158.49    0.69   1
  -1   5  -9   40.14    0.47   1
   0  -3 -19    9.41    0.67   1
   0   3 -14   58.07    0.79   1
   2  -6 -17    9.55    0.69   1
   2  -5 -17   58.72    0.85   1
   2  -2 -16   86.82    0.98   1
   2   0 -14    6.77    0.66   1
   3  -4 -15   61.18    0.87   1
   4  -5 -12  144.48    0.86   1
   4  -4 -11    4.49    0.52   1
  -3   3 -18    2.71    0.72   1
  -1   1 -18   17.35    0.83   1
  -1   2 -17   14.33    0.83   1
   0  -4 -19   24.08    0.66   1
   1  -6 -18    3.01    0.63   1
   1  -1 -17   33.46    0.78   1
   2   1 -11  382.97    1.07   1
   3  -7 -15   75.99    0.81   1
  -5   6 -15   97.42    0.89   1
  -4   5 -16    8.55    0.79   1
  -3   5 -15  433.56    1.36   1
  -2   2 -18  148.54    1.04   1
  -1  -1 -19  151.95    0.95   1
   1  -5 -18   66.63    0.82   1
   1  -4 -18    7.48    0.70   1
   1   0 -16   44.66    0.80   1
   3  -6 -15  116.54    0.93   1
   3  -5 -15  362.87    1.24   1
   3  -3 -14   55.06    0.83   1
   4  -6 -12  462.55    1.16   1
   4  -4 -10   62.72    0.55   1
  -4   2 -19    3.16    0.60   1
  -4   6 -14  289.25    1.10   1
  -3   6 -12  201.75    0.94   1
  -2   5 -13   65.17    0.79   1
   0  -1 -18   46.92    0.86   1
   2   1 -10   12.21    0.40   1
   3  -1 -10  120.91    0.68   1
   4  -5 -11    0.43    0.54   1
   4  -4  -9   61.34    0.49   1
   0   2 -15   16.71    0.81   1
   0   3 -13   52.73    0.72   1
   1   2 -12  427.16    1.18   1
   3  -1  -9  142.57    0.61   1
  -4   3 -18    3.84    0.72   1
  -4   4 -17    6.94    0.76   1
  -3   1 -19    3.43    0.68   1
  -2   0 -19   43.45    0.70   1
  -2   4 -15   22.48    0.86   1
  -1  -2 -19    9.64    0.67   1
  -1   3 -15    1.21    0.82   1
   0   0 -17   56.50    0.94   1
   1  -2 -17   20.38    0.87   1
   1   1 -14   11.45    0.77   1
   3  -4 -14   20.89    0.75   1
   4  -6 -11    8.84    0.54   1
  -3   6 -11   27.73    0.60   1
  -1   0 -18  140.96    1.03   1
   0   1 -16   36.97    0.79   1
   2  -4 -16   23.96    0.80   1
   3  -3 -13  191.22    0.98   1
   4  -5 -10   21.94    0.47   1
  -5   5 -16    4.09    0.70   1
  -3   4 -16  173.06    1.07   1
  -2   5 -12  229.77    0.95   1
  -1  -3 -19   60.92    0.75   1
   0   3 -12    4.19    0.63   1
   1  -1 -16    2.74    0.81   1
   1   0 -15   87.22    0.95   1
   1   2 -11  279.68    0.91   1
   2  -7 -16    1.44    0.63   1
   2   0 -12  798.33    1.52   1
   3  -5 -14  242.12    1.11   1
   4  -5  -9    0.36    0.37   1
  -5   3 -18   19.09    0.76   1
  -5   6 -14   41.61    0.79   1
  -4   6 -13    6.41    0.64   1
  -3   3 -17  110.16    0.99   1
  -3   5 -14    2.48    0.74   1
  -2   1 -18    1.05    0.79   1
  -1   1 -17   22.87    0.89   1
  -1   2 -16    4.59    0.81   1
   1  -7 -17    5.64    0.62   1
   2  -6 -16   16.19    0.71   1
   2  -5 -16    2.73    0.76   1
   3  -7 -14  103.76    0.81   1
   3  -6 -14    4.44    0.73   1
   4  -6 -10  181.69    0.74   1
  -5   4 -17   81.98    0.84   1
  -4   5 -15  101.23    0.89   1
  -3   6 -10    9.17    0.44   1
  -2  -1 -19  112.21    0.82   1
  -2   2 -17    1.90    0.86   1
   0  -3 -18   29.79    0.83   1
   0   2 -14  142.30    0.90   1
   1   1 -13   14.75    0.68   1
   1   2 -10 1511.26    1.77   1
  -6   5 -16   38.37    0.74   1
  -3   0 -19   11.81    0.67   1
  -3   6  -9    1.65    0.39   1
  -2   4 -14   10.05    0.75   1
  -2   5 -11  317.53    0.98   1
   0  -6 -18    8.33    0.58   1
   0  -1 -17   61.19    0.94   1
   0   3 -11  106.43    0.71   1
   1  -6 -17   32.65    0.75   1
   2  -1 -13  194.27    0.99   1
   2   0 -11  545.65    1.21   1
   3  -4 -13   64.89    0.78   1
   3  -3 -12    4.48    0.60   1
  -6   4 -17   50.81    0.73   1
  -2  -2 -19    5.46    0.64   1
  -1  -1 -18    7.81    0.77   1
  -1   3 -14   16.68    0.70   1
   0  -5 -18   27.75    0.71   1
   0   1 -15    3.57    0.77   1
   1  -5 -17    4.58    0.73   1
   1  -2 -16   60.06    0.91   1
   2  -2 -14   70.95    0.87   1
  -4   2 -18    7.91    0.70   1
  -4   6 -12  684.81    1.40   1
  -1   4 -11  114.83    0.67   1
   0   0 -16    8.47    0.82   1
   1   0 -14   62.81    0.84   1
   2   0 -10   88.52    0.61   1
   3  -2  -9    9.73    0.38   1
  -4   0 -19    2.41    0.58   1
  -4   4 -16  136.22    1.00   1
  -3  -1 -19    8.49    0.61   1
  -3   4 -15   92.21    0.94   1
  -2  -3 -19   37.47    0.68   1
  -2   0 -18   46.84    0.87   1
  -2   5 -10   72.43    0.58   1
   0   2 -13    5.31    0.67   1
   0   3 -10   13.70    0.42   1
   1  -1 -15   29.63    0.85   1
   1   1 -12    1.95    0.59   1
   2  -4 -15   86.14    0.92   1
   3  -5 -13   92.74    0.80   1
  -5   5 -15    1.65    0.77   1
  -5   6 -13  223.01    0.98   1
  -4   3 -17   11.10    0.77   1
  -3   1 -18   29.57    0.81   1
  -1  -2 -18  107.40    0.97   1
  -1   0 -17    4.41    0.81   1
  -1   2 -15   16.70    0.80   1
  -1   4 -10  118.54    0.63   1
   0   3  -9   37.80    0.45   1
   1  -8 -16    1.61    0.60   1
   2  -7 -15   47.40    0.79   1
   2  -1 -12   14.00    0.63   1
   2   0  -9  440.93    0.94   1
   3  -6 -13   71.61    0.74   1
   3  -3 -11   86.75    0.66   1
  -5   2 -18    2.97    0.68   1
  -3   3 -16    2.62    0.83   1
  -2   4 -13    2.03    0.67   1
  -2   5  -9    6.40    0.37   1
  -1   1 -16   13.66    0.83   1
   2  -5 -15  174.67    1.02   1
   3  -4 -12    9.07    0.60   1
  -4   6 -11   60.61    0.64   1
  -3  -2 -19    1.65    0.50   1
  -2   2 -16   12.59    0.90   1
  -1  -3 -18    5.67    0.75   1
  -1   4  -9   78.64    0.51   1
   2  -2 -13   61.35    0.80   1
  -5   3 -17   19.76    0.77   1
  -2  -1 -18    1.76    0.72   1
   0  -7 -17    7.91    0.59   1
   0  -3 -17  151.45    1.09   1
   0  -1 -16    4.88    0.84   1
   0   1 -14  189.68    1.03   1
   1  -7 -16   58.44    0.82   1
   1  -4 -16   13.53    0.81   1
   1   0 -13    3.16    0.65   1
   1   1 -11   54.60    0.56   1
   3  -3 -10  374.27    0.95   1
  -6   5 -15   33.38    0.77   1
  -3   5 -12    1.36    0.58   1
  -1  -5 -18    3.54    0.62   1
   0   0 -15  274.14    1.22   1
   0   2 -12  499.00    1.21   1
   1  -2 -15   18.70    0.81   1
   2  -1 -11  265.81    0.92   1
   3  -5 -12   41.83    0.63   1
  -7   3 -17   13.90    0.64   1
  -6   3 -17   10.50    0.69   1
  -3   4 -14    7.59    0.75   1
  -1  -1 -17   11.90    0.72   1
   0  -6 -17   66.93    0.78   1
   1  -6 -16    0.64    0.69   1
  -6   4 -16   76.77    0.84   1
  -5   6 -12  282.63    0.98   1
  -4   6 -10   46.13    0.49   1
  -2  -2 -18   39.77    0.79   1
  -2   4 -12   35.03    0.65   1
  -1   2 -14  137.14    0.89   1
  -1   3 -12  250.60    0.98   1
   0  -5 -17   53.06    0.80   1
   1   1 -10   11.64    0.39   1
   3  -7 -12   12.91    0.56   1
  -5   5 -14   18.72    0.71   1
  -4   3 -16   25.64    0.82   1
  -4   5 -13   61.71    0.75   1
  -2   0 -17   40.56    0.90   1
  -1   0 -16   29.34    0.88   1
  -1   1 -15   17.63    0.81   1
   2  -2 -12   11.19    0.62   1
   2  -1 -10    2.23    0.43   1
  -3  -1 -18    2.37    0.70   1
  -3   1 -17   41.36    0.90   1
  -3   3 -15  182.25    1.10   1
  -3   5 -11 1078.62    1.60   1
  -2  -3 -18    3.75    0.66   1
  -1  -2 -17    7.31    0.80   1
   0   1 -13   94.54    0.83   1
   0   2 -11  184.52    0.77   1
   1   0 -12  671.95    1.35   1
   1   1  -9  362.01    0.84   1
   2  -7 -14   -0.06    0.63   1
   2  -6 -14    3.88    0.66   1
   3  -5 -11   91.87    0.65   1
   3  -4 -10    3.48    0.42   1
  -4   0 -18    2.11    0.60   1
  -2  -4 -18    9.89    0.67   1
  -2   2 -15   11.18    0.83   1
   0  -8 -16    1.82    0.56   1
   1  -8 -15   27.30    0.70   1
  -5   2 -17   56.96    0.82   1
  -2   4 -11   11.63    0.51   1
  -1  -7 -17    0.95    0.54   1
   0  -1 -15    6.39    0.77   1
   0   0 -14   85.96    0.88   1
   1  -2 -14  259.62    1.14   1
   1  -1 -13   47.10    0.75   1
   3  -6 -11   23.32    0.57   1
  -6   5 -14   22.50    0.73   1
  -5   0 -18   -0.33    0.64   1
  -5   4 -15   94.51    0.91   1
  -3  -2 -18    2.66    0.69   1
  -3   4 -13   -0.44    0.65   1
  -3   5 -10  249.39    0.83   1
  -1   2 -13   12.13    0.71   1
   0  -3 -16    3.75    0.82   1
   0   2 -10  263.11    0.79   1
   1  -4 -15    3.77    0.70   1
  -5   3 -16    4.42    0.76   1
  -4  -1 -18    2.89    0.65   1
  -4   4 -14  334.65    1.22   1
  -1  -6 -17   32.31    0.70   1
  -1  -1 -16    9.69    0.84   1
   0  -7 -16   13.94    0.66   1
   1  -7 -15   32.30    0.71   1
   1  -5 -15   18.44    0.76   1
   1   0 -11  300.26    0.94   1
   3  -5 -10  239.55    0.79   1
  -3  -4 -18   17.95    0.62   1
  -3  -3 -18    6.81    0.66   1
  -3   0 -17    8.31    0.82   1
  -1  -5 -17    4.16    0.72   1
   0   1 -12   25.06    0.60   1
   1  -6 -15    6.16    0.70   1
  -6   3 -16   17.31    0.82   1
  -6   4 -15  127.41    0.99   1
  -5  -1 -18    8.96    0.62   1
  -5   5 -13    2.69    0.64   1
  -4  -2 -18    0.44    0.61   1
  -2   4 -10  172.18    0.71   1
  -1   0 -15  121.79    0.98   1
  -1   1 -14   78.29    0.78   1
   0  -6 -16    6.20    0.73   1
   0  -5 -16   13.26    0.78   1
   0   2  -9  339.08    0.81   1
   2  -5 -13  170.31    0.93   1
  -7   3 -16    4.42    0.69   1
  -3   3 -14  129.60    0.97   1
  -3   5  -9  126.72    0.57   1
  -2  -2 -17    1.83    0.81   1
  -2   0 -16   42.55    0.89   1
  -2   2 -14   71.78    0.88   1
   0  -2 -15   78.62    0.83   1
   2  -7 -13    3.86    0.62   1
  -7   4 -15    9.78    0.70   1
  -4  -3 -18    1.87    0.56   1
  -3   1 -16    2.57    0.80   1
  -3   4 -12  184.37    0.90   1
  -2   1 -15   50.18    0.90   1
  -1  -8 -16   53.20    0.65   1
  -1  -2 -16  185.26    1.14   1
  -1   2 -12    1.44    0.60   1
   0  -1 -14   34.01    0.78   1
   0   0 -13  115.65    0.84   1
   1  -2 -13   62.56    0.78   1
   1   0 -10 1017.32    1.42   1
   3  -5  -9  114.46    0.56   1
  -3  -1 -17   90.61    0.95   1
  -2  -6 -17    6.30    0.61   1
  -2   4  -9    4.91    0.37   1
   1  -8 -14   24.75    0.75   1
   2  -4 -12   84.59    0.67   1
  -6   1 -17   32.93    0.75   1
  -4   0 -17   28.72    0.83   1
  -4   5 -11  189.76    0.81   1
   0  -8 -15    3.98    0.69   1
   0  -3 -15    3.24    0.85   1
   0   1 -11  171.72    0.74   1
   1  -4 -14  106.49    0.85   1
  -6   5 -13   42.98    0.71   1
  -5   2 -16   35.23    0.87   1
  -4   4 -13   57.66    0.81   1
  -1  -7 -16    4.58    0.70   1
  -1  -3 -16   17.10    0.84   1
  -1  -1 -15    1.03    0.77   1
   3  -6  -9  158.26    0.63   1
  -5   3 -15   12.80    0.80   1
  -5   5 -12   53.67    0.68   1
  -3  -2 -17   16.74    0.77   1
  -2  -1 -16   18.85    0.75   1
  -1  -9 -15    0.76    0.54   1
  -1   1 -13  131.08    0.82   1
   1  -7 -14   46.56    0.76   1
   1  -6 -14   32.69    0.78   1
   1  -5 -14    3.92    0.71   1
   1  -1 -11   15.74    0.55   1
   2  -5 -12   22.33    0.63   1
  -6   2 -16  183.11    1.06   1
  -4  -1 -17    3.54    0.75   1
  -3  -6 -17    1.56    0.56   1
  -3   0 -16    6.34    0.82   1
  -3   3 -13   81.45    0.82   1
  -1  -6 -16    2.44    0.68   1
  -1   2 -11  266.41    0.90   1
   0  -7 -15    9.21    0.68   1
   0  -2 -14   72.57    0.85   1
  -7   2 -16  147.71    0.95   1
  -6   4 -14  110.20    0.90   1
  -3   4 -11    0.85    0.50   1
  -2   0 -15   75.20    0.92   1
  -2   2 -13   71.37    0.74   1
   0  -6 -15  101.67    0.92   1
   0   0 -12   15.27    0.53   1
   0   1 -10   11.95    0.45   1
   1  -2 -12  424.05    1.13   1
   2  -7 -12    9.34    0.57   1
   2  -3 -10   16.92    0.44   1
  -8   3 -15   83.29    0.81   1
  -6   3 -15    7.94    0.78   1
  -4   5 -10  631.00    1.18   1
  -3  -5 -17    3.09    0.64   1
  -2  -2 -16   35.34    0.87   1
  -2   1 -14  338.58    1.25   1
   0  -1 -13   84.22    0.74   1
  -7   3 -15   30.21    0.83   1
  -7   4 -14   34.96    0.82   1
  -5  -1 -17   11.84    0.75   1
   1  -4 -13  194.66    0.98   1
  -4  -5 -17    8.94    0.58   1
  -4   4 -12   24.30    0.64   1
  -2  -7 -16   33.86    0.70   1
  -4  -3 -17    1.60    0.60   1
  -3  -1 -16    5.63    0.80   1
  -2  -3 -16   14.24    0.84   1
  -1  -8 -15    4.83    0.66   1
  -1   1 -12  103.38    0.71   1
  -1   2 -10   14.33    0.46   1
   0  -3 -14  208.97    1.02   1
   1  -8 -13    0.03    0.60   1
   2  -3  -9  165.38    0.62   1
  -7   1 -16    3.03    0.69   1
  -5  -3 -17    4.65    0.63   1
  -5   2 -15  171.03    1.08   1
  -3   4 -10  241.78    0.80   1
  -2  -6 -16    6.45    0.66   1
  -1  -3 -15    2.07    0.77   1
  -1   0 -13  104.90    0.83   1
   0  -8 -14    4.58    0.68   1
   0   0 -11   19.12    0.51   1
   1  -5 -13    5.14    0.66   1
   1  -2 -11  468.78    1.11   1
   2  -4 -10   18.66    0.47   1
  -5   3 -14    7.61    0.78   1
  -3  -7 -16   50.44    0.68   1
  -3   3 -12  134.43    0.83   1
  -2  -4 -16   93.23    0.96   1
  -2   2 -12  282.71    1.01   1
  -2   3 -10   31.21    0.42   1
   0  -2 -13   41.31    0.74   1
   1  -7 -13    1.90    0.64   1
   2  -6 -11   70.91    0.64   1
  -4   1 -15  161.73    1.11   1
  -4   3 -13  226.06    1.05   1
  -1  -7 -15    1.33    0.69   1
   0  -1 -12   46.15    0.64   1
  -8   2 -15   41.09    0.80   1
  -6   2 -15  134.34    1.00   1
  -6   4 -13  111.48    0.87   1
  -5   0 -16    0.45    0.79   1
  -3   0 -15   58.66    0.83   1
  -2   0 -14   29.54    0.79   1
  -2   1 -13  281.62    1.09   1
  -1  -6 -15  119.83    0.94   1
   0  -7 -14    5.48    0.72   1
  -7   2 -15    0.04    0.73   1
  -6   3 -14   64.60    0.86   1
  -4   4 -11    3.18    0.53   1
  -3   4  -9  187.78    0.66   1
  -2  -8 -15   13.64    0.59   1
  -1  -9 -14    7.75    0.61   1
  -1  -2 -14  144.42    0.99   1
   0  -6 -14   11.60    0.75   1
   1  -4 -12  448.75    1.20   1
  -5   4 -12    2.59    0.67   1
  -3  -3 -16    1.80    0.68   1
  -2  -2 -15   19.22    0.73   1
  -2   3  -9  122.90    0.56   1
  -1   1 -11   55.67    0.54   1
   0  -9 -13   10.73    0.69   1
   0   0 -10  815.91    1.29   1
  -8   3 -14   32.25    0.76   1
  -7   3 -14    4.28    0.73   1
  -7   4 -13   75.31    0.83   1
  -5  -1 -16   19.40    0.80   1
  -4  -2 -16   53.71    0.87   1
  -3  -5 -16    6.02    0.64   1
  -3  -4 -16   12.08    0.67   1
  -3  -8 -15    1.49    0.55   1
  -3   3 -11 1279.29    1.75   1
  -2   2 -11  187.53    0.81   1
  -1  -1 -13  126.25    0.82   1
  -1   0 -12   17.89    0.60   1
   2  -6 -10   23.63    0.50   1
  -4  -5 -16    1.55    0.65   1
  -4   0 -15   10.99    0.82   1
  -2  -7 -15   11.58    0.68   1
  -1  -8 -14   33.92    0.72   1
  -1  -3 -14    3.85    0.77   1
  -5  -2 -16    5.03    0.78   1
  -5   2 -14  206.55    1.05   1
  -4  -4 -16    7.32    0.72   1
  -4   3 -12  134.95    0.85   1
  -2  -9 -14  136.39    0.80   1
   0  -8 -13    6.12    0.67   1
  -9   2 -14   33.44    0.65   1
  -7   1 -15  134.03    0.98   1
  -6  -4 -16   45.71    0.69   1
  -3   0 -14  148.85    1.02   1
  -2   0 -13   22.66    0.73   1
  -1   1 -10  364.93    0.93   1
   2  -5  -9  777.66    1.20   1
  -6   4 -12   13.70    0.67   1
  -5   5  -9  102.75    0.58   1
  -4   1 -14   47.27    0.80   1
  -4   4 -10  626.33    1.19   1
  -3  -7 -15   27.12    0.69   1
  -3  -2 -15    1.90    0.81   1
  -1  -7 -14   16.27    0.77   1
   0  -7 -13    5.94    0.70   1
   0  -5 -13   16.11    0.72   1
   1  -4 -11  441.36    1.11   1
   1  -2  -9   29.94    0.42   1
  -6   2 -14   17.20    0.83   1
  -6   5 -10   36.01    0.58   1
  -4  -1 -15   40.73    0.88   1
  -1  -6 -14   22.93    0.78   1
   0  -6 -13    4.86    0.70   1
  -8   2 -14   14.79    0.71   1
  -7   2 -14   31.11    0.91   1
  -6   3 -13    2.17    0.74   1
  -4  -7 -15    5.11    0.60   1
  -3  -3 -15  154.14    1.07   1
  -3   3 -10   37.94    0.50   1
  -1  -9 -13   19.55    0.71   1
   0  -3 -12   82.83    0.76   1
   2  -6  -9  602.39    1.08   1
  -7   4 -12   15.76    0.66   1
  -1   0 -11  462.38    1.08   1
  -9   1 -14    1.40    0.59   1
  -8  -1 -15    5.75    0.62   1
  -7   3 -13    4.96    0.76   1
  -4  -2 -15    1.80    0.81   1
  -3  -5 -15   75.78    0.95   1
  -3  -4 -15    2.01    0.78   1
  -5  -1 -15  138.71    0.98   1
  -4   0 -14  149.62    1.05   1
  -4   3 -11  227.71    0.91   1
  -2  -3 -14  175.39    1.10   1
  -1  -3 -13    2.80    0.74   1
   1  -7 -11   56.21    0.67   1
  -6  -1 -15  205.82    1.18   1
  -4   4  -9   63.68    0.50   1
  -3  -8 -14   32.13    0.77   1
  -2   1 -11  481.45    1.13   1
  -1  -8 -13   57.31    0.85   1
   1  -4 -10  326.09    0.91   1
  -9   0 -14   20.02    0.67   1
  -8   1 -14   35.39    0.81   1
  -4  -3 -15   61.90    0.84   1
  -2   0 -12  748.15    1.47   1
   0  -8 -12   25.50    0.71   1
  -7  -3 -15   31.69    0.68   1
  -7  -2 -15    7.72    0.72   1
  -6  -2 -15   47.68    0.87   1
  -4  -8 -14    7.13    0.61   1
  -3   0 -13    1.41    0.62   1
  -3   3  -9  406.53    0.91   1
  -2  -9 -13   28.54    0.70   1
   0  -5 -12   10.05    0.66   1
  -9   2 -13   55.17    0.77   1
  -5  -3 -15    1.41    0.76   1
  -5   4 -10   28.27    0.53   1
  -1  -7 -13    0.71    0.71   1
  -1  -2 -12   88.64    0.70   1
  -1   0 -10   41.80    0.49   1
   0  -7 -12   23.98    0.68   1
   0  -6 -12    2.15    0.68   1
   0  -3 -11    2.94    0.53   1
  -6   3 -12   29.85    0.76   1
  -3  -7 -14    6.97    0.70   1
  -1  -1 -11    7.08    0.52   1
  -9   3 -12    1.75    0.75   1
  -8   0 -14   50.08    0.78   1
  -8   2 -13    2.87    0.81   1
  -7   4 -11    4.65    0.67   1
  -3  -3 -14   33.01    0.85   1
  -2 -10 -12  115.28    0.82   1
  -1  -9 -12  131.66    0.90   1
   0  -2 -10  135.03    0.63   1
  -7   2 -13   57.01    0.89   1
  -4  -9 -13    2.56    0.60   1
  -2  -8 -13   81.09    0.89   1
   0  -9 -11   77.46    0.78   1
   1  -8 -10   78.23    0.66   1
  -8   4 -11    9.14    0.67   1
  -7   3 -12    7.89    0.71   1
  -4   3 -10   17.15    0.50   1
  -2   1 -10   26.07    0.49   1
   1  -7 -10    5.45    0.50   1
  -9   1 -13   65.66    0.76   1
  -5  -1 -14   20.87    0.75   1
  -3 -10 -12    3.81    0.58   1
  -2  -3 -13   28.76    0.70   1
  -8  -3 -14   40.56    0.65   1
  -8  -2 -14    5.37    0.65   1
  -6  -6 -14   38.50    0.69   1
  -4  -6 -14    4.46    0.76   1
  -2  -7 -13   53.59    0.83   1
   0  -8 -11  159.94    0.93   1
  -7  -5 -14    0.56    0.49   1
  -7  -1 -14   -0.47    0.82   1
  -6  -1 -14    2.20    0.75   1
  -5  -6 -14   27.49    0.78   1
  -5   4  -9    4.54    0.40   1
  -4   2 -11   14.06    0.61   1
  -3  -8 -13    2.21    0.69   1
  -3   1 -11  402.10    1.11   1
  -2  -4 -13   25.91    0.80   1
  -1  -2 -11  198.33    0.85   1
  -8   1 -13   30.96    0.85   1
  -7   1 -13   19.06    0.83   1
  -3  -2 -13  106.53    0.95   1
  -2  -9 -12   45.34    0.78   1
  -2  -6 -13  179.74    1.08   1
   0  -3 -10    8.92    0.42   1
  -9   0 -13   37.12    0.73   1
  -9   2 -12   55.97    0.84   1
  -7  -4 -14   44.15    0.66   1
  -7  -3 -14    0.08    0.71   1
  -7  -2 -14   54.64    0.80   1
  -6  -2 -14  114.71    1.05   1
  -5  -8 -13    3.91    0.59   1
  -5  -5 -14   76.36    0.92   1
  -5  -3 -14  115.23    1.02   1
  -5   0 -13   15.76    0.83   1
  -2  -2 -12  176.08    0.93   1
   0  -2  -9  559.14    1.02   1
 -10   1 -12    3.74    0.59   1
  -6  -4 -14   84.45    0.93   1
  -1  -6 -12   96.61    0.86   1
  -9  -1 -13   20.99    0.66   1
  -7   2 -12  127.61    0.99   1
  -7   4 -10    7.64    0.55   1
  -3  -3 -13  146.82    1.03   1
  -2   1  -9  305.55    0.81   1
   1  -8  -9  276.67    0.86   1
  -9   3 -11  142.13    0.91   1
  -8   0 -13    2.55    0.76   1
  -8   2 -12   59.47    0.87   1
  -6  -7 -13   49.83    0.72   1
  -5   3 -10   29.14    0.57   1
  -3  -9 -12   -0.72    0.61   1
  -3  -1 -12    6.53    0.66   1
  -2 -10 -11    3.16    0.69   1
   0  -9 -10  308.33    1.04   1
  -8   3 -11  156.15    1.01   1
  -5   2 -11  108.77    0.81   1
  -4  -2 -13    3.80    0.77   1
  -2  -8 -12  167.11    1.00   1
  -2  -3 -12  301.62    1.14   1
 -10   2 -11   13.98    0.71   1
  -7  -6 -13    1.08    0.52   1
  -6   4  -9   49.30    0.57   1
  -5  -1 -13   53.40    0.89   1
  -5   4  -8 1035.63    1.35   1
 -10  -1 -12   15.82    0.59   1
  -9   1 -12   27.36    0.72   1
  -4   1 -11  138.18    0.84   1
  -4   2 -10   63.51    0.60   1
  -3 -10 -11    4.24    0.64   1
  -3   0 -11   86.39    0.72   1
  -3   1 -10  142.14    0.72   1
   0  -8 -10   94.12    0.79   1
   0  -5 -10    6.39    0.49   1
  -8  -3 -13   21.10    0.70   1
  -8  -2 -13   -0.23    0.73   1
  -6  -6 -13   17.31    0.73   1
  -6  -1 -13    6.09    0.82   1
  -6   1 -12   10.72    0.81   1
  -4 -10 -11    4.35    0.61   1
  -4  -6 -13    0.75    0.79   1
  -4  -3 -13   36.37    0.86   1
  -2  -7 -12   61.93    0.83   1
  -2  -4 -12  212.16    1.00   1
  -1  -8 -11  176.57    0.95   1
  -1  -2 -10    7.35    0.41   1
   0  -3  -9   55.87    0.45   1
  -8   1 -12   34.24    0.86   1
  -7  -5 -13    4.01    0.56   1
  -5  -2 -13   35.98    0.87   1
  -4  -4 -13    3.51    0.82   1
   0  -6 -10    2.93    0.52   1
  -9   0 -12   45.48    0.77   1
  -7  -4 -13   17.61    0.74   1
  -7  -2 -13    2.00    0.83   1
  -6  -2 -13    7.49    0.85   1
  -6   2 -11   91.82    0.85   1
  -5   0 -12   73.84    0.88   1
  -2  -9 -11   13.03    0.70   1
  -1  -7 -11    2.49    0.67   1
  -1  -6 -11  244.50    1.03   1
  -7  -3 -13    3.00    0.78   1
  -6  -5 -13   48.67    0.77   1
  -5  -8 -12    2.19    0.65   1
  -5  -5 -13    7.84    0.80   1
  -5  -3 -13   87.93    0.90   1
  -4  -8 -12    2.42    0.70   1
  -4  -1 -12   58.52    0.73   1
  -7   2 -11   10.83    0.84   1
  -6  -4 -13    2.87    0.80   1
  -6  -3 -13   40.96    0.82   1
  -5   3  -9  222.35    0.79   1
  -3  -7 -12    1.74    0.76   1
  -9  -3 -12    3.78    0.61   1
  -9   3 -10   72.40    0.83   1
  -8   0 -12   36.42    0.87   1
  -8   4  -9   14.67    0.66   1
  -7   3 -10    5.14    0.63   1
  -1  -9 -10  427.65    1.22   1
   0  -9  -9  128.13    0.78   1
 -11   1 -10    5.49    0.54   1
  -8   3 -10    7.75    0.75   1
  -6  -7 -12    4.52    0.68   1
  -5   2 -10  324.94    1.01   1
  -4   0 -11    2.10    0.62   1
  -3  -9 -11    4.39    0.68   1
  -3  -4 -12  125.03    0.96   1
  -2 -10 -10   12.22    0.68   1
  -2  -3 -11  172.59    0.90   1
  -8  -5 -12  107.09    0.73   1
  -7  -6 -12    4.51    0.61   1
  -6   4  -8  415.42    0.94   1
  -5  -9 -11    0.83    0.62   1
  -5  -1 -12    3.60    0.75   1
  -4  -9 -11    3.01    0.74   1
  -4  -2 -12   73.77    0.79   1
  -3  -5 -12    4.03    0.69   1
 -10   2 -10   16.36    0.74   1
  -9   1 -11  282.70    1.17   1
   0  -8  -9  218.01    0.90   1
 -10  -1 -11    6.45    0.65   1
  -8  -4 -12   76.86    0.80   1
  -6  -1 -12    4.21    0.82   1
  -6   1 -11   32.64    0.77   1
  -4  -6 -12    2.01    0.81   1
  -3 -10 -10    4.15    0.70   1
  -2  -4 -11   40.70    0.66   1
  -1  -8 -10   13.17    0.64   1
  -1  -4 -10   67.94    0.60   1
  -8  -3 -12   69.36    0.88   1
  -8  -2 -12   85.01    0.86   1
  -7  -1 -12   31.00    0.83   1
  -6  -6 -12   -0.85    0.75   1
  -4  -5 -12    3.65    0.78   1
  -2  -6 -11   46.34    0.79   1
   0  -7  -9    9.51    0.49   1
  -8   1 -11  152.28    1.07   1
  -6   2 -10    1.31    0.64   1
  -6   3  -9  100.81    0.67   1
  -3  -8 -11    3.73    0.74   1
  -2  -9 -10   39.45    0.80   1
  -9   0 -11    3.19    0.77   1
  -9   2 -10   82.88    0.92   1
  -7  -4 -12    5.26    0.81   1
  -7  -3 -12   44.38    0.91   1
  -7  -2 -12   25.21    0.78   1
  -7   4  -8  396.97    1.00   1
  -6  -5 -12    9.36    0.82   1
  -5  -5 -12    4.32    0.82   1
  -5  -3 -12   69.32    0.96   1
  -5   0 -11    8.87    0.62   1
  -4  -1 -11  106.87    0.77   1
  -1  -6 -10   81.31    0.73   1
 -10   1 -10   82.21    0.81   1
  -9  -4 -11    1.45    0.60   1
  -8  -6 -11   27.00    0.60   1
  -7  -7 -11    3.03    0.60   1
  -6  -4 -12    7.36    0.84   1
  -6  -3 -12    4.49    0.88   1
  -5  -8 -11    5.31    0.73   1
  -5  -4 -12   24.37    0.86   1
  -4  -8 -11    1.58    0.73   1
  -9  -1 -11  158.84    1.00   1
  -9   3  -9   87.02    0.83   1
  -8   2 -10   84.69    0.87   1
  -7   2 -10  478.27    1.35   1
  -7   3  -9  183.70    0.87   1
  -6  -9 -10    6.52    0.59   1
  -1  -3  -9    0.86    0.36   1
 -11   1  -9   20.03    0.65   1
  -9  -3 -11   79.78    0.81   1
  -8   0 -11    0.50    0.82   1
  -6   4  -7   48.64    0.45   1
  -5   2  -9    5.04    0.48   1
  -3  -9 -10   29.77    0.82   1
  -3  -4 -11    1.50    0.68   1
  -2 -10  -9  164.77    0.93   1
  -1  -9  -9   30.93    0.65   1
 -10   0 -10    0.37    0.73   1
  -8  -5 -11   71.90    0.79   1
  -8   3  -9  422.07    1.22   1
  -6  -7 -11    1.87    0.76   1
  -5  -1 -11    2.32    0.71   1
  -4  -2 -11   37.13    0.67   1
  -4   2  -8  407.82    0.89   1
  -3  -5 -11   98.03    0.93   1
  -5  -9 -10    6.14    0.68   1
  -4  -9 -10    1.26    0.69   1
 -11   0  -9   10.16    0.66   1
 -10   2  -9   15.90    0.67   1
  -9   1 -10   13.73    0.75   1
  -8  -4 -11    4.43    0.71   1
  -6   1 -10    4.70    0.66   1
  -2  -7 -10   84.64    0.82   1
  -2  -4 -10  279.42    1.01   1
  -1  -8  -9  715.49    1.45   1
   0  -8  -8    7.12    0.46   1
  -8  -3 -11   72.37    0.91   1
  -8  -2 -11   16.60    0.88   1
  -7  -1 -11    3.59    0.90   1
  -6  -1 -11   26.62    0.77   1
  -5 -10  -9    3.46    0.61   1
  -3  -2 -10  149.65    0.81   1
   0  -6  -8  407.39    0.95   1
  -7  -5 -11    3.02    0.78   1
  -7   1 -10   17.59    0.76   1
  -6   2  -9  141.61    0.79   1
  -6   3  -8   45.67    0.52   1
  -5  -6 -11    6.72    0.84   1
  -4 -10  -9   -0.60    0.68   1
  -4  -5 -11    4.56    0.76   1
  -3 -11  -8  106.12    0.85   1
  -2  -6 -10  249.75    1.00   1
  -2  -2  -9   21.09    0.47   1
  -1  -7  -9   90.93    0.72   1
  -1  -5  -9    3.01    0.48   1
  -9   0 -10   39.70    0.83   1
  -7  -2 -11   73.66    1.00   1
  -7   4  -7   24.14    0.48   1
  -6  -2 -11   95.30    0.99   1
  -4 -11  -8   12.36    0.61   1
  -4  -1 -10    5.32    0.62   1
  -2  -9  -9   24.24    0.71   1
  -1  -6  -9  230.69    0.90   1
  -9   2  -9   30.29    0.76   1
  -7  -4 -11  117.55    0.96   1
  -7  -3 -11   19.90    0.93   1
  -6  -5 -11    4.27    0.84   1
  -5  -5 -11   12.75    0.85   1
  -5  -4 -11   40.25    0.88   1
  -5  -3 -11    8.70    0.69   1
  -4  -8 -10    9.38    0.77   1
 -10   1  -9    2.66    0.68   1
  -9  -4 -10   27.21    0.70   1
  -7   2  -9   73.62    0.77   1
  -6  -4 -11    4.19    0.86   1
  -6  -3 -11    3.18    0.75   1
  -5  -8 -10    8.85    0.69   1
  -3  -3 -10   10.19    0.53   1
  -1  -3  -8  105.07    0.54   1
  -9  -3 -10   17.04    0.75   1
  -9  -1 -10    1.90    0.76   1
  -9   3  -8   52.65    0.71   1
  -8   0 -10  183.58    1.13   1
  -8   2  -9   38.71    0.75   1
  -7   3  -8  323.99    0.99   1
  -6  -9  -9   88.00    0.80   1
  -3  -1  -9   93.50    0.59   1
  -1  -9  -8   31.00    0.66   1
 -11   1  -8    8.68    0.64   1
 -10  -4  -9    2.89    0.59   1
  -9  -6  -9   10.20    0.53   1
  -8   3  -8   95.50    0.75   1
  -6 -10  -8    1.10    0.57   1
  -5   2  -8  457.26    1.01   1
  -4  -2 -10   29.76    0.67   1
  -4   0  -9    2.08    0.47   1
  -3  -4 -10   93.27    0.82   1
  -2 -10  -8    2.02    0.62   1
  -2  -8  -9  179.75    0.96   1
  -2  -3  -9   38.58    0.49   1
 -10   0  -9   12.53    0.73   1
  -8  -5 -10    7.81    0.63   1
  -5  -1 -10    5.52    0.68   1
  -3  -5 -10   11.61    0.63   1
  -3   0  -8  686.90    1.14   1
 -10   2  -8    1.62    0.63   1
  -9   1  -9  320.59    1.24   1
  -4  -9  -9  244.99    1.15   1
 -11   0  -8   16.14    0.68   1
 -10  -2  -9    5.25    0.68   1
 -10  -1  -9    0.69    0.68   1
  -8  -4 -10  145.84    1.03   1
  -6  -1 -10   25.50    0.81   1
  -6   1  -9   91.60    0.76   1
  -5 -11  -7   58.68    0.70   1
  -4  -6 -10   27.63    0.85   1
  -4  -3 -10    4.83    0.68   1
  -2  -7  -9   50.58    0.74   1
  -2  -4  -9  174.21    0.80   1
  -1  -8  -8    3.64    0.55   1
 -11  -2  -8    0.50    0.59   1
  -8  -2 -10  269.63    1.21   1
  -7  -1 -10   36.42    0.81   1
  -6  -6 -10    1.28    0.84   1
   0  -6  -7    3.31    0.34   1
 -11   2  -7   -0.20    0.59   1
  -8   1  -9  232.17    1.12   1
  -7   1  -9   24.50    0.73   1
  -6   2  -8  155.53    0.75   1
  -6   3  -7  186.70    0.68   1
  -5  -6 -10    5.07    0.71   1
  -4 -11  -7   85.52    0.83   1
  -4  -5 -10    0.54    0.64   1
  -4  -4 -10    7.94    0.62   1
  -3 -11  -7    7.89    0.66   1
  -2  -2  -8   75.45    0.51   1
  -1  -7  -8    5.96    0.52   1
  -1  -5  -8   43.61    0.49   1
  -9   0  -9    1.22    0.75   1
  -9   2  -8   31.84    0.73   1
  -8  -6  -9    0.01    0.68   1
  -7  -3 -10   49.06    0.94   1
  -7  -2 -10  152.54    1.03   1
  -6  -5 -10    5.48    0.85   1
  -6  -2 -10   17.72    0.81   1
  -5  -3 -10   15.15    0.77   1
  -5   0  -9   12.12    0.51   1
  -4  -1  -9  125.84    0.75   1
 -10   1  -8   54.75    0.79   1
  -6  -3 -10    5.21    0.82   1
  -5  -8  -9   20.44    0.87   1
  -5  -4 -10    3.13    0.77   1
  -4  -8  -9    0.17    0.76   1
  -9  -1  -9  142.88    1.06   1
  -9   3  -7  521.20    1.30   1
  -8   2  -8  434.78    1.25   1
  -7   2  -8  147.13    0.84   1
  -3  -3  -9  208.04    0.83   1
 -10  -4  -8    5.18    0.61   1
  -9  -6  -8    3.20    0.57   1
  -9  -3  -9   28.44    0.73   1
  -8   0  -9   14.14    0.81   1
  -7   3  -7   57.24    0.56   1
  -1  -9  -7  231.02    0.92   1
 -10   0  -8    2.88    0.74   1
  -8   3  -7  324.56    1.02   1
  -7  -8  -8   16.80    0.69   1
  -6  -7  -9    5.40    0.81   1
  -5   2  -7   99.81    0.54   1
  -4   0  -8  280.61    0.84   1
  -3  -4  -9    2.71    0.57   1
  -2 -10  -7    6.01    0.60   1
  -2  -8  -8    4.51    0.62   1
  -2  -3  -8   25.59    0.45   1
 -12  -1  -6    6.42    0.53   1
 -11  -3  -7    4.12    0.56   1
 -10   2  -7    3.81    0.68   1
  -8  -7  -8   40.44    0.71   1
  -5  -9  -8    5.49    0.75   1
  -5  -7  -9   59.52    0.98   1
  -5  -1  -9   43.39    0.61   1
  -4  -9  -8   52.65    0.84   1
 -10  -2  -8    2.17    0.72   1
 -10  -1  -8   24.85    0.75   1
  -9  -7  -7    2.50    0.50   1
  -9   1  -8   11.11    0.75   1
  -8  -4  -9   14.77    0.84   1
  -7  -9  -7   44.78    0.68   1
  -5 -11  -6   76.32    0.78   1
  -5 -10  -7   26.52    0.76   1
 -11  -1  -7    0.46    0.63   1
  -9  -5  -8    2.48    0.68   1
  -8  -3  -9  140.70    1.08   1
  -8  -2  -9    6.37    0.87   1
  -7  -1  -9    2.38    0.80   1
  -6  -1  -9    8.30    0.74   1
  -6   1  -8    7.55    0.53   1
  -4  -6  -9    1.38    0.78   1
  -2  -7  -8    5.25    0.61   1
  -2  -4  -8  371.71    0.97   1
 -11   2  -6   67.14    0.75   1
 -10  -5  -7    3.13    0.56   1
  -8   1  -8  183.80    1.02   1
  -5  -6  -9    4.86    0.80   1
  -4 -11  -6   57.87    0.80   1
  -3 -11  -6  214.71    1.04   1
  -9   0  -8    6.37    0.75   1
  -7  -2  -9  249.43    1.22   1
  -7   1  -8   14.96    0.65   1
  -3  -2  -8   58.33    0.49   1
 -10   1  -7    8.12    0.76   1
  -9  -4  -8   25.78    0.80   1
  -9   2  -7    3.36    0.65   1
  -8  -6  -8  207.45    1.04   1
  -7  -7  -8  102.79    0.94   1
  -7  -4  -9   66.44    0.87   1
  -7  -3  -9   52.28    0.95   1
  -6  -5  -9   25.30    0.88   1
  -6  -2  -9   85.39    0.82   1
  -6   2  -7  119.76    0.63   1
  -5  -5  -9   41.33    0.88   1
  -5  -3  -9   28.72    0.76   1
  -5   0  -8  337.87    0.98   1
  -4  -8  -8   17.06    0.78   1
  -2  -9  -7  212.06    0.95   1
  -1  -5  -7  104.36    0.55   1
  -9  -1  -8    9.61    0.80   1
  -6  -9  -7    6.65    0.71   1
  -6  -3  -9    0.34    0.77   1
  -5  -4  -9    3.09    0.65   1
  -4  -1  -8   65.60    0.53   1
  -1  -6  -7 1328.00    1.61   1
 -11   1  -6    3.26    0.70   1
 -10  -4  -7    2.21    0.59   1
  -9  -6  -7    0.45    0.62   1
  -9  -3  -8   56.61    0.90   1
  -9   3  -6   51.42    0.69   1
  -8   2  -7   10.77    0.59   1
  -7   2  -7   17.11    0.54   1
  -3  -3  -8   20.57    0.50   1
 -12  -1  -5    4.75    0.60   1
 -10   0  -7   31.35    0.78   1
  -8  -5  -8   -0.38    0.78   1
  -8   0  -8  319.86    1.24   1
  -7  -8  -7  128.48    0.94   1
  -7   3  -6   39.14    0.50   1
  -6  -7  -8   90.18    1.02   1
  -3  -9  -7   63.97    0.81   1
 -11  -3  -6   12.78    0.55   1
  -8   3  -6   95.91    0.69   1
  -7  -6  -8  180.68    1.13   1
  -5  -9  -7    4.24    0.76   1
  -5   1  -7  515.88    1.03   1
 -11  -2  -6    5.42    0.62   1
 -10   2  -6   79.90    0.77   1
  -9  -7  -6   16.43    0.58   1
  -9   1  -7  233.03    1.07   1
  -5 -11  -5    2.68    0.64   1
  -5 -10  -6    3.60    0.75   1
 -10  -5  -6    1.82    0.59   1
  -9  -5  -7   48.64    0.83   1
  -8  -3  -8   61.70    0.85   1
  -8  -2  -8  403.32    1.37   1
   6  10 -10   18.31    0.57   2
   7   6  -9    1.39    0.68   2
   6   1  -9  195.12    0.85   2
   7   3  -8    1.75    0.70   2
   7   5  -3    8.20    0.69   2
   7   7  -4    2.73    0.73   2
   7   8  -6    3.51    0.67   2
   6   2 -11    4.43    0.64   2
   6   3 -12   10.30    0.62   2
   6   5 -13  147.06    0.91   2
   6   6 -13    1.94    0.56   2
   6  11  -8   11.14    0.48   2
   7   2  -7    7.28    0.66   2
   5   0 -10    1.44    0.40   2
   5   4   2    8.04    0.35   2
   6   1 -10  110.62    0.77   2
   7   3  -3    1.52    0.50   2
   7   7 -10    5.57    0.68   2
   7   8  -9    1.26    0.63   2
   6   4 -13    1.33    0.63   2
   7   4  -2   39.14    0.70   2
   6   8 -13    0.38    0.50   2
   7   6 -11    1.49    0.67   2
   7   9  -8    1.31    0.56   2
   7   9  -7    5.00    0.52   2
   7   4 -11   -0.14    0.69   2
   7   8 -10   36.83    0.66   2
   6   2 -12  140.20    0.79   2
   7   5  -1    3.09    0.62   2
   7   9  -9    8.11    0.53   2
   6   0  -9    2.24    0.50   2
   6   0  -3    5.08    0.37   2
   6   1 -11    6.28    0.56   2
   6   3 -13   76.51    0.76   2
   6   9   0    1.96    0.58   2
   6  10  -1    3.61    0.58   2
   7   1  -5    2.31    0.46   2
   6   6 -14    4.92    0.49   2
   7   1  -8    1.60    0.58   2
   7   3 -11    3.48    0.64   2
   7   5 -12    3.80    0.67   2
   7   6 -12   15.16    0.68   2
   7   8 -11   -0.30    0.53   2
   8   5  -6    1.70    0.73   2
   7   9 -10   30.72    0.56   2
   7  10  -7   13.99    0.53   2
   8   5  -5   13.39    0.73   2
   8   6  -6    2.53    0.71   2
   7   7 -12   34.14    0.60   2
   8   3  -6    3.92    0.71   2
   8   5  -4    9.46    0.72   2
   8   6  -5    6.08    0.71   2
   6   0 -10  277.16    0.93   2
   8   3  -8    3.04    0.73   2
   8   5  -9    2.55    0.72   2
   7   2 -11   33.16    0.68   2
   7   3 -12    0.32    0.68   2
   7  10  -4    2.16    0.56   2
   8   7  -5    3.70    0.67   2
   6  -1  -6    1.90    0.37   2
   6   5   2  143.27    0.73   2
   6   6   2    4.06    0.49   2
   8   2  -6    0.11    0.66   2
   8   5  -3    3.53    0.65   2
   8   7  -4   12.55    0.75   2
   7   5 -13   21.93    0.67   2
   8   3  -3    1.24    0.66   2
   8   4 -10   13.35    0.73   2
   8   6 -10    5.34    0.66   2
   8   7  -9    4.19    0.58   2
   8   8  -7   27.96    0.63   2
   8   8  -6    0.71    0.61   2
   8   2  -4    5.51    0.64   2
   8   8  -8    1.26    0.56   2
   8   4  -2  132.21    0.96   2
   8   7 -10    4.97    0.56   2
   8   1  -6    4.88    0.66   2
   8   5 -11    1.60    0.60   2
   8   8  -9   39.62    0.58   2
   7   1 -11   24.21    0.63   2
   7  10  -2    1.76    0.59   2
   8   4 -11    4.92    0.65   2
   7   3 -13   77.60    0.74   2
   8   2 -10   38.33    0.77   2
   8   7  -2    2.48    0.69   2
   8   9  -7    3.31    0.49   2
   8   9  -6    4.48    0.54   2
   8   3 -11    5.18    0.68   2
   8   1  -9    2.00    0.65   2
   8   5 -12    1.54    0.58   2
   8   6 -12    1.63    0.52   2
   8   9  -4    1.43    0.55   2
   6   2   2  436.47    0.96   2
   9   5  -5    0.72    0.62   2
   6   4   3  110.21    0.61   2
   7   1   0   97.95    0.61   2
   8   1 -10  206.47    1.04   2
   9   3  -8   69.75    0.87   2
   9   4  -4    2.52    0.65   2
   9   5  -4   84.81    0.89   2
   9   6  -8   55.37    0.72   2
   9   6  -5   25.11    0.73   2
   7   0 -11    3.19    0.59   2
   8   1  -2   45.89    0.61   2
   9   2  -7    3.73    0.74   2
   9   5  -9   45.60    0.73   2
   7  -1  -9   56.90    0.61   2
   7   4   2    9.18    0.52   2
   9   5  -3    5.37    0.76   2
   9   6  -9    4.18    0.56   2
   6   3   3    1.54    0.41   2
   8   3   0    6.52    0.57   2
   9   7  -5    1.35    0.62   2
   8   1 -11    2.51    0.61   2
   8   9  -2    3.31    0.53   2
   9   3 -10   29.35    0.71   2
   7   3   2   96.90    0.68   2
   8   1  -1  121.63    0.75   2
   9   1  -7    2.76    0.65   2
   9   4  -2  102.30    0.94   2
   9   6 -10   80.31    0.70   2
   6   1   2   76.21    0.49   2
   9   1  -4    3.65    0.71   2
   9   3  -2    2.16    0.75   2
   9   8  -6   14.36    0.56   2
   7   0   0    1.34    0.37   2
   8  -1  -7   96.21    0.78   2
   8   3 -13    1.04    0.54   2
   9   5 -11    1.79    0.51   2
   9   7  -3    1.55    0.61   2
   8  -1  -8   12.32    0.65   2
   9   1  -9    4.77    0.70   2
   9   1  -3   30.39    0.75   2
   9   3 -11    1.69    0.60   2
   6   2   3    3.65    0.35   2
   7   2   2   30.33    0.48   2
   8   1 -12   29.12    0.70   2
   9   0  -6    4.49    0.74   2
   9   8  -4    1.70    0.52   2
   9   7  -2    3.42    0.62   2
   8   0 -11   26.01    0.63   2
   9   0  -8    3.53    0.70   2
   9   1 -10  139.35    0.94   2
   9   1  -2    2.76    0.69   2
   9   2 -11    4.23    0.61   2
   9   8  -3    9.18    0.55   2
  10   3  -6   12.56    0.72   2
  10   4  -7    1.04    0.65   2
   9   2  -1    0.74    0.62   2
  10   5  -7   81.00    0.75   2
   7  -2  -9   13.92    0.52   2
   9   0  -9   12.73    0.74   2
   9   3 -12   67.73    0.73   2
  10   2  -5    4.42    0.74   2
  10   3  -8    1.57    0.66   2
   7   1   2  138.44    0.69   2
   7   3   3   47.32    0.57   2
   8   5   2  309.49    1.12   2
   9   3   0  198.79    1.04   2
   9   4   0  236.22    1.08   2
   9   5   0    6.00    0.68   2
  10   2  -8   59.00    0.84   2
  10   4  -9    4.02    0.61   2
  10   6  -7    0.42    0.50   2
  10   6  -6   37.52    0.60   2
   8   0   0  144.71    0.82   2
   9  -1  -5   14.21    0.71   2
   9   1 -11    7.01    0.65   2
   9   8  -2   22.08    0.55   2
  10   2  -4   25.27    0.71   2
  10   4  -3    0.32    0.74   2
  10   5  -9   94.69    0.69   2
   8  -2  -7    4.45    0.58   2
   8   6   2   49.03    0.71   2
   9  -1  -7    4.53    0.69   2
   9   2 -12    4.57    0.59   2
  10   1  -7   39.06    0.85   2
  10   1  -6    9.26    0.66   2
   7   2   3    4.60    0.50   2
   8  -2  -8    1.23    0.55   2
  10   1  -4    1.07    0.76   2
   6  -3  -7   15.59    0.36   2
  10   3  -2    1.83    0.75   2
  10   0  -6    2.80    0.76   2
  10   2 -10   73.69    0.78   2
  10   5  -2    3.36    0.64   2
  10   6  -3   22.30    0.62   2
   6   2   4    1.44    0.37   2
   7  -2  -1   90.09    0.54   2
   9   1 -12    5.58    0.64   2
   9   1   0    0.21    0.61   2
   9   3   1   80.13    0.86   2
   9   4   1    4.16    0.67   2
   9   7   0    0.81    0.57   2
  10   0  -5   27.61    0.80   2
   7  -1   1  129.39    0.61   2
   9   2   1    1.39    0.67   2
  10   1  -2    2.52    0.74   2
  10   6  -2    4.32    0.60   2
   7   1   3   14.34    0.46   2
   8   4   3  103.22    0.76   2
   9  -2  -7   10.02    0.66   2
   9  -2  -5    1.53    0.68   2
   9   6   1    1.28    0.60   2
  10   0  -9   16.10    0.71   2
  10   0  -3    2.90    0.72   2
  10   2 -11    1.26    0.60   2
   8  -2 -10   23.39    0.62   2
  10  -1  -6   31.38    0.73   2
  11   3  -7   66.73    0.71   2
  11   3  -6   37.35    0.67   2
  11   4  -6   26.49    0.60   2
  10   0  -2    7.33    0.64   2
  10   1  -1  246.87    1.08   2
  10   6  -1    5.52    0.57   2
  11   2  -7    0.42    0.66   2
  11   2  -5    5.76    0.67   2
  11   3  -4    1.22    0.66   2
  11   4  -7    2.25    0.43   2
  11   4  -5    8.65    0.57   2
   6   1   4   16.88    0.36   2
  10   3   0    2.30    0.70   2
  11   2  -8   49.48    0.72   2
   7   2   4  152.26    0.70   2
   8  -1   1   43.61    0.61   2
   8   0   2    3.60    0.55   2
   9  -1 -11   12.93    0.64   2
   9   5   2   28.10    0.64   2
  10   5   0    5.07    0.64   2
  11   1  -7   79.45    0.83   2
  11   1  -5   80.09    0.80   2
  11   1  -4    3.86    0.72   2
  11   5  -4   -0.09    0.53   2
   7   0   3  304.00    0.86   2
   8  -3  -9  446.15    1.16   2
   8   1   3   27.27    0.59   2
   9  -2 -10   11.11    0.65   2
  11   0  -5    2.06    0.64   2
   7  -2   1   36.91    0.43   2
   9  -3  -7    6.64    0.65   2
  10  -2  -7    3.28    0.62   2
  10   1 -12   14.05    0.54   2
  10   6   0    2.70    0.53   2
  11   0  -8   37.13    0.73   2
   6   2   5  320.80    0.83   2
   7   1   4  194.54    0.75   2
  10   0   0   19.42    0.77   2
  10   4   1    5.52    0.62   2
  11   0  -3   83.76    0.90   2
   9  -3  -8  191.15    0.93   2
  10  -2  -3    2.22    0.63   2
  11   5  -2   13.92    0.62   2
  10   1   1  273.32    1.18   2
   8  -2   1    3.99    0.53   2
   9  -2   0  426.34    1.22   2
   9   0   2  284.57    1.08   2
  11  -1  -4    3.33    0.67   2
  11   0  -2   27.93    0.81   2
  11   4  -1   48.17    0.70   2
   7  -3   0   54.87    0.47   2
   8  -4  -6   -0.30    0.52   2
  10  -1 -11    1.36    0.63   2
  11  -1  -3   47.81    0.87   2
   7  -1   3   21.84    0.44   2
  10  -1   0  288.85    1.16   2
   7  -2   2   45.99    0.50   2
   7   2   5   81.69    0.60   2
  10   3   2    9.46    0.65   2
  11   0  -1   29.54    0.81   2
  11   5  -1    2.10    0.50   2
  12   2  -6   29.97    0.57   2
  12   2  -5   30.08    0.61   2
   6   1   5  171.56    0.62   2
   8  -3   0  228.56    0.82   2
   8   1   4    3.16    0.50   2
  10  -2 -10    2.92    0.62   2
  11  -2  -5    5.90    0.77   2
  11   2   0    2.48    0.67   2
  12   1  -6   23.81    0.62   2
  12   1  -5   14.56    0.64   2
  12   2  -4  112.95    0.79   2
  10   1   2    5.89    0.68   2
  12   1  -4    2.44    0.64   2
  12   3  -4    8.16    0.52   2
   8  -2   2    2.71    0.51   2
   8  -1   3   11.78    0.53   2
   9  -2   1   98.19    0.74   2
  12   0  -5   26.20    0.70   2
  12   2  -3    5.79    0.61   2
   7  -3   1  227.54    0.75   2
  10  -3  -2    0.42    0.70   2
  10  -2   0    5.53    0.70   2
  10  -1   1  201.35    1.06   2
  11  -1 -10   26.60    0.65   2
  11   0 -11    0.41    0.50   2
  11   0   0    2.88    0.77   2
  12   0  -7    3.72    0.62   2
  12   0  -4   57.09    0.80   2
  12   1  -3    1.58    0.65   2
  12   3  -3    3.30    0.54   2
   7   1   5   82.26    0.60   2
  10  -3  -9  155.14    0.96   2
  10   0   2  506.76    1.41   2
  11   5   0    3.56    0.49   2
   8  -3   1   14.77    0.54   2
   8   0   4   27.72    0.57   2
   9  -4  -8   89.15    0.76   2
  11  -2  -9   56.72    0.78   2
  11   2   1    2.81    0.69   2
  11   3   1    1.20    0.60   2
  12   0  -8   32.53    0.63   2
  12   1  -2    3.63    0.68   2
  12   2  -2   12.04    0.64   2
  11   1   1   25.90    0.75   2
  12  -1  -4   37.66    0.79   2
  10  -4  -6    2.31    0.68   2
  10  -4  -5   54.06    0.81   2
  11  -1   0   30.74    0.79   2
  11   4   1    9.63    0.57   2
  12   0  -2   32.01    0.76   2
   9  -2   2   78.66    0.71   2
   9   1   4    8.13    0.61   2
  10  -4  -7    5.65    0.70   2
  12  -1  -8    9.89    0.59   2
  12  -1  -3   18.19    0.73   2
   7  -4   0   17.76    0.46   2
   9  -4  -9   47.77    0.66   2
   9  -4  -1   28.10    0.66   2
   9  -3   1  208.63    0.94   2
  10  -4  -3    2.92    0.72   2
  11  -2 -10   12.79    0.64   2
  12   3  -1    4.57    0.54   2
   7  -5  -5   56.34    0.52   2
   7  -3   2   38.11    0.45   2
   7   0   5   73.93    0.59   2
   8  -4   0  202.69    0.85   2
   8   1   5   38.46    0.62   2
  12  -2  -5   99.54    0.91   2
  12  -1  -2    4.37    0.75   2
   7  -5  -6    3.44    0.41   2
   8  -5  -6   11.46    0.54   2
   8  -5  -4   46.30    0.59   2
   8  -3   2   52.89    0.62   2
   8  -1   4   41.00    0.62   2
   9   0   4    5.19    0.61   2
  10   0   3    0.79    0.70   2
  11  -2   0    2.48    0.75   2
  11   2   2   12.86    0.63   2
  12  -1  -9    0.94    0.54   2
   9  -5  -6  497.33    1.27   2
  12  -1  -1   11.65    0.75   2
  12   2   0    3.54    0.58   2
  10  -4  -9   60.43    0.77   2
  10  -4  -1    7.03    0.71   2
  10  -2   2  522.30    1.45   2
  11  -4  -6  106.90    0.94   2
  11   0   2  240.27    1.12   2
  12   3   0   17.82    0.57   2
   7  -4   1  848.33    1.34   2
   8  -4   1   24.79    0.55   2
   8   0   5  144.70    0.77   2
   9  -3   2   10.81    0.65   2
  10  -3   1   47.14    0.71   2
  11  -4  -3   30.76    0.83   2
  12  -3  -5   50.25    0.87   2
  13   0  -5    3.33    0.51   2
   7  -2   4  195.00    0.76   2
   9  -5  -2    3.12    0.62   2
   9  -1   4   13.78    0.65   2
  11  -2   1   88.07    0.94   2
  13   0  -4    3.44    0.53   2
   7  -3   3  203.60    0.77   2
   9   1   5  323.37    1.09   2
  10  -5  -6    2.98    0.68   2
  11  -3   0    5.64    0.75   2
  11  -1   2  113.18    0.97   2
  12  -3  -7    9.73    0.65   2
  12  -2  -1    4.49    0.74   2
  13  -1  -5    4.34    0.56   2
  13   0  -3   11.46    0.55   2
   7  -5  -1  272.91    0.85   2
   7  -1   5   35.08    0.48   2
   8  -2   4  123.61    0.73   2
   9  -4   1    0.23    0.59   2
  10  -5  -3  176.34    1.02   2
  12   1   1    9.46    0.64   2
  12   2   1    4.16    0.57   2
  13  -1  -6   10.25    0.55   2
  13  -1  -4    3.85    0.57   2
  12  -3  -8    2.77    0.60   2
  12  -3  -2    1.40    0.72   2
  12   0   1    2.46    0.67   2
  13  -1  -3    7.83    0.60   2
  13   1  -2    1.20    0.52   2
  10  -3   2  128.65    0.95   2
  12  -2   0    0.05    0.70   2
  13   0  -2   14.32    0.58   2
   7  -4   2   22.37    0.48   2
   8  -4   2   36.97    0.58   2
   8  -1   5   30.70    0.56   2
   9   0   5  143.21    0.83   2
  11  -3   1    2.72    0.73   2
  11   0   3   29.40    0.73   2
  13  -2  -5   27.50    0.65   2
  13  -2  -4   19.28    0.64   2
   6   0   6   44.55    0.42   2
  12  -4  -4   61.99    0.86   2
  12  -3  -9    2.34    0.58   2
   7  -5   0  150.75    0.66   2
   7   0   6  419.27    0.99   2
  11  -5  -6  288.88    1.16   2
  11  -5  -3   75.41    0.92   2
  11  -1   3    2.14    0.68   2
  12  -4  -7   41.34    0.77   2
  12  -4  -3   50.64    0.83   2
  13   0  -1   33.25    0.62   2
  12   2   2   20.16    0.58   2
  13  -1  -1   15.50    0.63   2
   9  -6  -4    7.71    0.62   2
   9  -1   5  119.31    0.79   2
  11  -5  -2    2.40    0.73   2
  12   0   2   25.88    0.69   2
  13  -3  -4   19.20    0.69   2
   7  -2   5  135.48    0.67   2
   8  -5   1    0.87    0.51   2
   8   0   6  327.58    1.00   2
   9  -6  -6    2.43    0.57   2
  11  -3   2  101.96    0.94   2
  12  -4  -8   46.88    0.70   2
   8  -2   5  119.25    0.77   2
   9  -5   1  100.95    0.78   2
  10  -6  -5   26.92    0.71   2
  11  -2   3   11.02    0.73   2
  12  -4  -1    3.66    0.76   2
  12  -1   2    3.64    0.66   2
  13  -3  -7    8.27    0.57   2
  13  -3  -3   -0.17    0.54   2
   7  -6  -3  276.62    0.83   2
   8  -6  -7    3.67    0.51   2
   8  -4   3   35.87    0.60   2
  10  -6  -6   18.48    0.72   2
  13  -3  -2    6.96    0.64   2
   9  -3   4    9.86    0.63   2
   7  -6  -2    5.77    0.41   2
   8  -6  -1    5.60    0.53   2
   9  -6  -1    0.36    0.61   2
   9  -4   3   12.62    0.56   2
  10  -6  -2    4.02    0.70   2
  10  -5   1  209.22    1.04   2
  12  -4   0    3.48    0.73   2
  11  -6  -5    3.63    0.70   2
  11  -6  -4   46.36    0.82   2
  11  -1   4    2.59    0.65   2
  12  -5  -7   20.83    0.69   2
  12  -5  -2    5.63    0.74   2
  12   0   3    2.85    0.63   2
  13  -4  -6    1.79    0.58   2
  13  -4  -4    9.38    0.65   2
  13   0   1   20.16    0.63   2
  10  -6  -1  188.65    1.00   2
  12   2   3    4.91    0.48   2
   9  -5   2   54.10    0.64   2
  10  -4   3    3.01    0.73   2
  10  -3   4   24.38    0.71   2
  12  -1   3   83.37    0.81   2
  13  -4  -7   12.34    0.57   2
  13  -1   1    1.67    0.56   2
   7  -5   2   14.64    0.40   2
   8  -6   0  136.94    0.73   2
  12  -4   1    5.78    0.73   2
   9  -1   6    6.51    0.62   2
  10  -6   0  167.28    0.97   2
  10  -5   2   23.68    0.74   2
  11  -6  -7    1.54    0.61   2
  11  -5   1    1.91    0.63   2
   7  -3   5   28.90    0.45   2
  11  -6  -1   52.50    0.83   2
  12  -2   3    5.14    0.66   2
  13  -4  -1    1.47    0.56   2
   7  -2   6  332.39    0.93   2
   9  -3   5   50.92    0.70   2
  11   0   5    5.41    0.60   2
  12  -6  -5   36.18    0.77   2
  12  -6  -3   45.17    0.84   2
  13  -5  -3    2.38    0.68   2
  13   0   2   56.06    0.65   2
   8  -6   1   55.52    0.63   2
   8  -5   3   13.32    0.59   2
   8  -2   6   67.43    0.64   2
   9  -7  -4   10.58    0.64   2
   9  -7  -3   85.07    0.79   2
   9  -6   1    8.55    0.56   2
   9  -5   3  159.39    0.91   2
  11  -6  -8   99.56    0.79   2
  11  -4   3   65.88    0.89   2
  12  -6  -6   75.68    0.79   2
  13  -5  -6    7.05    0.62   2
  13  -3   1    1.26    0.67   2
  13  -1   2   15.44    0.62   2
  14  -3  -3    5.22    0.48   2
   6  -3   5   30.80    0.42   2
  10  -7  -4    0.82    0.68   2
  10  -7  -3   14.98    0.72   2
  10  -6   1   55.57    0.81   2
  11  -5   2   47.32    0.85   2
  11  -3   4    4.01    0.72   2
  12  -6  -2  135.94    0.99   2
  13  -5  -2   52.35    0.81   2
   6  -2   6   60.90    0.46   2
   7  -5   3  319.38    0.92   2
   8  -7  -3   99.15    0.71   2
  12  -6  -7  106.59    0.87   2
  12  -3   3    8.36    0.73   2
  13  -5  -7    7.11    0.53   2
  14  -3  -2   16.23    0.48   2
   8  -7  -2  180.53    0.84   2
  10  -7  -6    1.36    0.63   2
  10  -5   3  203.47    0.98   2
  10  -3   5  169.16    0.97   2
  10  -1   6    1.92    0.60   2
  11  -7  -4   12.00    0.72   2
  12  -6  -1    5.01    0.76   2
  14  -4  -4   38.21    0.61   2
   7  -1   7   10.15    0.47   2
  10  -7  -1   11.07    0.74   2
  11  -6   1   61.78    0.85   2
  11  -2   5    3.30    0.67   2
  13  -4   1    6.00    0.68   2
  14  -4  -3    0.31    0.52   2
  14  -3  -1    6.12    0.49   2
   8  -1   7   20.62    0.56   2
  11  -7  -2   27.96    0.82   2
  12  -2   4   -0.10    0.63   2
  14  -4  -2   28.66    0.58   2
   8  -4   5  130.01    0.79   2
  10  -6   2  182.23    0.95   2
  11  -5   3   69.53    0.87   2
  12  -6  -8   25.23    0.60   2
  13  -6  -5   22.49    0.66   2
  13  -6  -3   37.58    0.76   2
  13  -5   0   23.40    0.75   2
  13  -1   3   59.89    0.67   2
   6  -5   3    7.77    0.39   2
   6  -1   7   22.45    0.39   2
   7  -4   5   71.05    0.58   2
   8  -5   4   33.36    0.65   2
   8  -3   6   91.48    0.74   2
   9  -7   0    9.96    0.60   2
   9  -5   4   10.95    0.68   2
  11  -7  -1    3.03    0.73   2
  12  -5   2   52.09    0.83   2
  14  -3   0    1.24    0.53   2
   7  -6   2    3.15    0.45   2
   9  -3   6   44.09    0.69   2
   9  -1   7  214.33    0.92   2
  11  -7  -7   94.61    0.78   2
  11  -3   5  129.36    0.92   2
  13  -6  -6    1.73    0.59   2
  13  -6  -2    2.77    0.59   2
  13  -2   3   37.68    0.66   2
  14  -4  -1    3.19    0.52   2
  10  -5   4   16.07    0.75   2
  11  -6   2   67.93    0.79   2
  12  -6   1   32.03    0.83   2
  13  -6  -1   17.41    0.72   2
  13  -4   2    1.45    0.69   2
  14  -5  -3   47.34    0.64   2
   7  -5   4   21.95    0.45   2
   9  -6   3    0.07    0.65   2
  12  -7  -6   20.54    0.66   2
  13  -5   1    0.63    0.59   2
  14  -5  -2   29.71    0.61   2
   7  -2   7   15.19    0.49   2
   8  -6   3   84.44    0.70   2
   8  -2   7    8.67    0.53   2
  10  -6   3   76.88    0.85   2
  11  -1   6    2.81    0.59   2
  12  -7  -1   65.10    0.89   2
  13  -3   3    7.31    0.62   2
  14  -4   0    1.49    0.52   2
   6  -3   6   17.74    0.38   2
   8  -7   1    4.95    0.59   2
  10  -3   6   14.61    0.68   2
  13  -6   0    5.86    0.70   2
  14  -5  -1    1.03    0.56   2
   9  -2   7    4.01    0.57   2
  10  -8  -4    3.33    0.71   2
  10  -8  -3    7.25    0.71   2
  11  -7   1    1.88    0.74   2
  11  -2   6   66.77    0.77   2
  12  -6   2   -0.06    0.74   2
  12  -4   4   26.05    0.74   2
   6  -7  -4  542.10    0.99   2
   6  -6   2  337.53    0.85   2
   7  -6   3   22.38    0.51   2
   9  -8  -4   35.18    0.67   2
   9  -8  -2   80.38    0.79   2
  10  -8  -5    0.40    0.67   2
  11  -8  -3    1.45    0.72   2
  11  -6   3   46.12    0.83   2
  13  -1   4   22.54    0.51   2
  14  -4   1    0.34    0.53   2
   6  -2   7  107.49    0.54   2
   8  -4   6   30.05    0.64   2
   9  -8  -5   27.45    0.65   2
   9  -7   2    5.42    0.67   2
   9  -4   6  121.23    0.88   2
  10  -7   2   70.82    0.85   2
  11  -8  -5    3.53    0.67   2
  13  -7  -5    1.84    0.61   2
  13  -7  -2   50.89    0.81   2
  13  -2   4   92.55    0.70   2
  14  -6  -3    1.04    0.54   2
  14  -5   0    2.82    0.55   2
   9  -6   4   10.15    0.73   2
  10  -8  -6    6.11    0.62   2
  12  -3   5    0.27    0.61   2
  13  -7  -6    3.15    0.63   2
  13  -6   1   22.34    0.65   2
  14  -6  -2   29.44    0.63   2
   6  -7  -1    5.32    0.36   2
   7  -7   1  452.98    1.05   2
   7  -4   6  205.76    0.81   2
   8  -8  -4    1.56    0.51   2
   8  -8  -2   22.64    0.59   2
   8  -7   2  441.17    1.15   2
   8  -6   4    3.49    0.58   2
   8  -3   7  319.99    1.08   2
  10  -4   6   25.85    0.73   2
  10  -2   7    2.71    0.63   2
  11  -8  -6   37.85    0.75   2
  11  -8  -1   15.79    0.82   2
  11  -3   6    3.32    0.66   2
  12  -7   1    2.77    0.75   2
  13  -3   4   21.12    0.63   2
   9  -3   7  443.19    1.24   2
  12  -6   3   10.11    0.77   2
   7  -3   7   51.63    0.55   2
   9  -8   0   31.14    0.67   2
  11  -8   0    1.53    0.78   2
  11  -6   4   57.41    0.88   2
  11  -5   5   72.00    0.88   2
  12  -8  -5   13.59    0.66   2
  13  -7  -7    5.71    0.54   2
  14  -5   1    7.03    0.56   2
   9  -7   3  179.78    0.93   2
  10  -7   3   57.00    0.83   2
  12  -4   5   67.07    0.79   2
  13  -6   2   14.09    0.62   2
  14  -6   0    1.19    0.56   2
   7  -7   2    4.58    0.51   2
   7  -6   4  487.31    1.14   2
  10  -3   7    3.50    0.63   2
  11  -4   6  100.15    0.87   2
  12  -8  -6    8.57    0.64   2
  12  -7   2    2.90    0.65   2
  12  -2   6    0.33    0.59   2
  13  -4   4   18.87    0.62   2
   6  -4   6   47.17    0.49   2
   9  -5   6  251.38    1.09   2
  11  -7   3  181.22    1.01   2
  12  -8   0    1.41    0.77   2
  14  -7  -4   11.58    0.52   2
   7  -8  -2    1.88    0.47   2
   8  -5   6   30.31    0.65   2
   8  -2   8  407.19    1.13   2
   9  -6   5    1.27    0.72   2
  11  -2   7    0.68    0.63   2
  13  -8  -4    0.44    0.64   2
  13  -8  -3   10.77    0.66   2
  13  -2   5    0.12    0.49   2
  14  -5   2    0.13    0.55   2
   6  -7   1    4.52    0.40   2
   6  -3   7  175.19    0.66   2
   8  -6   5  265.24    1.02   2
   9  -4   7   61.68    0.75   2
  10  -5   6    2.42    0.70   2
  12  -6   4    5.60    0.76   2
  12  -5   5    4.32    0.70   2
  12  -3   6   23.63    0.65   2
  13  -8  -5   39.76    0.68   2
  13  -6   3    0.56    0.67   2
  14  -7  -1    2.31    0.58   2
  14  -6   1    8.67    0.56   2
   7  -8  -5  133.64    0.66   2
   9  -7   4    5.87    0.70   2
  10  -9  -3   13.12    0.75   2
  10  -7   4  124.29    0.97   2
   7  -7   3  570.83    1.22   2
   7  -5   6   18.22    0.52   2
  10  -9  -4   53.78    0.78   2
  10  -9  -2   10.58    0.76   2
  10  -4   7    4.30    0.66   2
  11  -9  -4    1.05    0.73   2
  11  -9  -3   23.86    0.78   2
  11  -9  -2    6.20    0.79   2
  11  -3   7   -0.05    0.64   2
  13  -8  -6    2.22    0.57   2
  14  -7   0    2.44    0.57   2
   6  -6   4   66.44    0.54   2
   7  -4   7   25.17    0.53   2
   9  -9  -3   45.72    0.72   2
   9  -9  -2    1.71    0.65   2
  10  -9  -5    7.88    0.71   2
  11  -7   4    6.89    0.76   2
  11  -5   6    4.24    0.70   2
  12  -4   6    1.93    0.65   2
   8  -7   4    8.81    0.53   2
   9  -9  -4    5.55    0.62   2
  12  -9  -4   46.48    0.81   2
  12  -9  -2    6.78    0.75   2
  13  -4   5    5.74    0.59   2
  14  -6   2    4.69    0.56   2
   8  -3   8   91.42    0.72   2
   9  -9  -5   26.41    0.62   2
  11  -9  -6  142.96    0.92   2
  11  -8   3   78.85    0.94   2
  12  -9  -5    4.33    0.64   2
  12  -7   4    6.36    0.77   2
  14  -8  -4    4.67    0.52   2
  14  -8  -3    2.07    0.54   2
  14  -7   1    2.55    0.50   2
   7  -3   8  313.16    0.93   2
   9  -9   0   21.18    0.68   2
   9  -5   7   79.05    0.86   2
  10  -7   5  275.03    1.22   2
  10  -6   6   33.88    0.73   2
  13  -5   5    2.38    0.67   2
   8  -9  -4   12.21    0.59   2
   9  -7   5  155.65    0.93   2
  10  -5   7    1.45    0.72   2
  11  -9   1    2.02    0.78   2
  12  -5   6   26.17    0.73   2
  13  -9  -3   27.64    0.70   2
  14  -6   3   33.29    0.63   2
  11  -7   5   13.94    0.81   2
  11  -6   6   13.15    0.76   2
  13  -9  -4   57.96    0.72   2
  13  -9  -1   19.89    0.73   2
  13  -8   2    4.17    0.70   2
  14  -8   0   28.13    0.62   2
  14  -7   2    1.07    0.56   2
   6  -7   3    4.74    0.36   2
   7  -8   2  112.08    0.72   2
   8  -7   5   16.10    0.68   2
  10  -8   4  250.71    1.21   2
  12  -3   7    2.48    0.54   2
  13  -9  -5   27.36    0.65   2
  13  -3   6    4.21    0.46   2
   8  -4   8  939.20    1.64   2
   9  -8   4   20.83    0.77   2
  11  -8   4  103.30    0.99   2
  11  -5   7   33.77    0.73   2
  13  -9   0   16.18    0.75   2
   6  -3   8   43.30    0.48   2
  10  -4   8   14.13    0.70   2
  12  -4   7   79.16    0.78   2
  13  -7   4    0.10    0.69   2
  13  -6   5    4.61    0.60   2
   8  -9   1    2.24    0.66   2
   9  -9   2   28.47    0.67   2
  11 -10  -2   26.38    0.79   2
  12  -9   2   11.54    0.78   2
  12  -6   6   27.75    0.74   2
  13  -9  -6   21.86    0.56   2
  13  -8   3   27.76    0.72   2
   6  -8   1  553.53    1.12   2
   9  -6   7   35.55    0.77   2
  10 -10  -3    1.11    0.71   2
  10 -10  -2   20.54    0.82   2
  11 -10  -3   63.56    0.83   2
  12  -8   4    0.43    0.63   2
  13  -9   1    7.70    0.68   2
  14  -9  -3    9.27    0.60   2
  14  -7   3   32.31    0.61   2
  14  -6   4    7.98    0.53   2
   5  -7   2  418.79    0.91   2
   7  -8   3    3.89    0.47   2
   7  -7   5   29.45    0.61   2
  10 -10  -4   22.32    0.78   2
  10  -6   7    5.88    0.72   2
  11 -10  -4   27.03    0.73   2
  12 -10  -3   45.47    0.78   2
  12 -10  -2   47.55    0.79   2
  13  -5   6    4.79    0.56   2
  14  -9  -1   11.65    0.58   2
   7  -9  -4  413.14    1.02   2
   8  -9   2  101.43    0.81   2
   8  -6   7   98.39    0.82   2
  10  -8   5   19.29    0.82   2
  11  -4   8    0.20    0.65   2
  12  -5   7    7.50    0.68   2
  14  -8   2    5.03    0.55   2
   9 -10  -2   52.85    0.81   2
   9  -5   8    5.90    0.67   2
  10  -5   8   24.63    0.77   2
  11 -10  -5    7.90    0.68   2
  11  -8   5    5.80    0.68   2
  11  -6   7   12.03    0.74   2
  12 -10   0    3.35    0.80   2
  12  -9   3    5.09    0.77   2
  13  -9   2    1.34    0.69   2
  14  -9   0    1.14    0.57   2
   5  -5   6  310.97    0.80   2
   6  -8   2   47.51    0.56   2
   6  -5   7  160.95    0.72   2
   8  -5   8   19.73    0.66   2
  10 -10  -5   -0.71    0.64   2
  13 -10  -2    8.86    0.63   2
   9 -10  -4   35.91    0.67   2
  12  -8   5   14.63    0.77   2
  12  -7   6   14.48    0.74   2
  13  -6   6   15.88    0.69   2
   6  -4   8  412.44    0.98   2
   7  -8   4  270.26    0.94   2
   8  -8   5   99.95    0.85   2
  13 -10  -4    0.92    0.57   2
  14  -9   1    5.88    0.49   2
  14  -8   3   63.63    0.69   2
   5  -6   5   59.96    0.46   2
   7  -6   7    5.20    0.50   2
  11 -10   2   48.33    0.91   2
  11  -5   8    2.89    0.61   2
  12  -6   7   45.48    0.73   2
  13  -9   3    8.03    0.68   2
   6  -7   5  150.72    0.75   2
   7  -7   6   55.14    0.69   2
   9  -7   7    7.40    0.76   2
   9  -4   9    3.60    0.61   2
  10  -8   6   23.14    0.90   2
  10  -7   7    2.62    0.78   2
  12 -10   2   14.12    0.80   2
  12  -9   4   20.87    0.69   2
   6  -8   3  296.69    0.89   2
   8 -10  -3   31.07    0.65   2
   8  -4   9   16.18    0.60   2
   9  -8   6   11.33    0.79   2
   9  -6   8   56.19    0.82   2
  10  -6   8    3.51    0.73   2
  11  -7   7    5.36    0.75   2
  14  -9   2   11.98    0.56   2
   8 -10   0    1.55    0.65   2
  13  -8   5   -0.22    0.63   2
  13  -7   6   20.85    0.63   2
  13  -5   7    8.37    0.48   2
   6  -9  -2    2.24    0.40   2
   6  -9  -1   40.17    0.52   2
  10 -10   3    0.79    0.82   2
  10  -9   5    1.38    0.71   2
  13 -10   2   54.88    0.76   2
  13  -9   4   21.47    0.67   2
  14  -8   4   15.19    0.58   2
   5  -7   4  237.14    0.75   2
   7  -8   5    4.40    0.51   2
   8 -10   1    3.56    0.72   2
  11 -11  -3   15.88    0.72   2
  11 -11  -2   29.23    0.80   2
  11 -11  -1    1.41    0.76   2
  12 -11  -2    2.53    0.68   2
  12 -11  -1   -0.50    0.70   2
  12 -10   3   46.70    0.82   2
  12  -5   8    1.14    0.56   2
  14 -10   0    3.91    0.55   2
   8  -8   6    5.50    0.62   2
  10 -11  -2  172.16    1.05   2
  10 -11  -1   50.71    0.84   2
  12 -11  -3   75.17    0.79   2
  12  -9   5   29.79    0.78   2
  14  -9   3   30.43    0.57   2
   5  -5   7   24.16    0.39   2
   6  -8   4  130.31    0.67   2
   6  -5   8   13.79    0.48   2
   9 -10   3    5.11    0.67   2
  10 -11   0   51.19    0.90   2
  11 -11  -4   41.64    0.76   2
  12 -11  -4   46.18    0.75   2
  13  -6   7    0.30    0.52   2
  14 -10   1   35.94    0.61   2
   5  -4   8 1118.82    1.42   2
   6  -7   6   62.48    0.63   2
   8 -10   2   17.92    0.65   2
  11 -11   1    4.48    0.84   2
  11 -10   4   47.06    0.81   2
  12 -11   1   -0.85    0.75   2
  13 -11  -2   30.67    0.67   2
  13 -11  -1   70.49    0.76   2
  13 -10   3    7.02    0.67   2
   7 -10  -1  360.76    1.07   2
   8  -9   5   38.11    0.77   2
  10 -11  -4   27.44    0.71   2
  10 -11   1   61.24    0.96   2
  10  -7   8   31.32    0.83   2
  11  -8   7   71.57    0.90   2
  12 -10   4   52.69    0.86   2
  12  -6   8    1.39    0.64   2
  13  -8   6   21.82    0.65   2
   7 -10  -3  250.03    0.91   2
   7 -10   0   17.22    0.64   2
   7  -9   4   95.65    0.80   2
   9 -11  -2    2.59    0.68   2
   9 -11  -1   23.38    0.76   2
  10  -9   6   47.58    0.81   2
  11 -11   2   50.33    0.93   2
  11  -9   6   13.22    0.74   2
  13 -11  -4  106.06    0.74   2
  13  -9   5   10.20    0.66   2
  14 -10   2    2.34    0.47   2
  14  -9   4    5.69    0.55   2
   6  -9   2    4.81    0.46   2
   6  -4   9   43.53    0.54   2
   7  -8   6  296.08    1.08   2
   9 -11  -3   37.44    0.73   2
   9 -11   0    7.47    0.66   2
   9  -9   6  214.80    1.13   2
  10 -11   2   11.69    0.82   2
  12 -11   2    6.45    0.75   2
  13 -11   1    4.65    0.68   2
  13  -7   7    3.33    0.56   2
   6  -8   5 1289.20    1.78   2
  10  -6   9   59.47    0.80   2
  11 -10   5   79.32    0.96   2
  12  -8   7    3.85    0.67   2
  13 -10   4   57.23    0.76   2
   9 -11  -4   23.61    0.70   2
  11 -11   3   11.84    0.84   2
  13 -11   2    2.52    0.64   2
  14 -10   3   17.51    0.56   2
   6  -9   3    6.52    0.57   2
   7 -10   2    3.88    0.66   2
   8  -6   9   57.15    0.75   2
  11  -6   9    3.41    0.68   2
  12 -11   3    1.08    0.75   2
  12 -10   5  148.84    0.99   2
  12  -7   8    4.22    0.62   2
   7  -9   5    3.38    0.67   2
   8 -11  -1   73.79    0.81   2
   8 -10   4    9.24    0.73   2
   9 -11   2    0.21    0.70   2
   9 -10   5  118.66    0.99   2
  10 -11   3   44.89    0.81   2
   8 -11  -2  329.83    1.10   2
   8 -11   0    7.51    0.72   2
  10  -8   8   17.83    0.82   2
   5  -8   4  726.61    1.27   2
   5  -5   8   12.21    0.43   2
   8 -11  -3   82.48    0.78   2
   9  -8   8    3.48    0.79   2
  11 -12  -2    2.85    0.70   2
  11 -12  -1   65.59    0.90   2
  11 -12   0   11.97    0.80   2
  11 -11   4    7.34    0.84   2
  11  -8   8    8.24    0.73   2
  12 -12  -2   16.94    0.67   2
  12 -12  -1    5.63    0.70   2
  13 -11   3   17.50    0.66   2
  13 -10   5   -0.66    0.62   2
  13  -8   7    5.77    0.58   2
   5  -9  -2    0.82    0.36   2
   5  -9  -1   83.96    0.54   2
   5  -9   0    5.18    0.44   2
   5  -7   6    8.94    0.48   2
   6  -5   9    7.10    0.49   2
   9 -11   3    8.39    0.71   2
   9  -9   7    4.40    0.83   2
   9  -7   9   52.54    0.85   2
  10 -11   4   10.56    0.87   2
  10 -10   6   42.04    0.91   2
  11 -10   6   34.30    0.85   2
  12 -12  -3   70.81    0.79   2
  12 -12   0    3.22    0.73   2
  12 -11   4   55.20    0.82   2
   4  -7   4  207.72    0.66   2
   6  -8   6    1.06    0.51   2
   8  -5  10   26.09    0.67   2
  10 -12  -1   59.83    0.89   2
  10 -12   0   15.73    0.80   2
  11  -7   9   12.16    0.73   2
  12 -10   6    2.96    0.71   2
  13 -12  -2    9.06    0.60   2
  13 -12  -1    3.09    0.58   2
   6 -10  -1  144.92    0.74   2
   6 -10   0  156.00    0.79   2
   8 -11   2   83.09    0.82   2
   8 -10   5    6.32    0.65   2
   8  -8   8   66.79    0.88   2
  12  -8   8    9.63    0.64   2
  13 -12   0    0.45    0.58   2
   5  -4   9    4.51    0.36   2
   8  -9   7    9.37    0.78   2
   8  -7   9  151.26    0.97   2
   9 -11   4    2.39    0.82   2
  10 -12  -3   95.30    0.83   2
  11 -12   2   60.90    0.93   2
  12 -12   2   22.56    0.78   2
  13 -11   4   52.36    0.65   2
   5  -9   2   84.57    0.62   2
  11 -11   5   13.47    0.72   2
  12 -11   5   33.13    0.77   2
   5  -8   5  232.54    0.81   2
   6  -9   5    0.76    0.58   2
   9 -12  -1    1.85    0.77   2
   9 -12   0    4.95    0.74   2
  10 -12   2   30.23    0.80   2
  10 -11   5    8.11    0.73   2
  10  -9   8   69.57    0.95   2
  11  -9   8    7.67    0.74   2
  12  -7   9    1.40    0.58   2
  13 -12   2   13.87    0.63   2
  13 -10   6    3.70    0.60   2
  13  -9   7    5.76    0.55   2
   6 -10   2    9.69    0.54   2
   6  -7   8   17.16    0.61   2
   9 -12  -2   54.62    0.78   2
   9 -12   1    4.29    0.81   2
  10 -10   7   16.06    0.87   2
  10  -8   9   67.38    0.89   2
  11 -12   3   99.48    0.90   2
  11 -10   7    4.97    0.82   2
  12 -12   3   81.22    0.85   2
   4  -7   5  185.69    0.66   2
   5  -9   3  121.55    0.72   2
   5  -6   8  521.25    1.12   2
   6  -8   7  643.22    1.39   2
   7 -11  -2  489.48    1.21   2
   7 -11   1    8.74    0.68   2
   8 -10   6  184.69    1.00   2
   9 -12  -3    8.95    0.71   2
   9 -11   5    4.41    0.81   2
   9  -8   9  159.06    1.04   2
  11  -8   9    9.95    0.66   2
  13 -11   5    2.10    0.58   2
   4  -8   3    7.99    0.41   2
   6 -10   3   11.46    0.62   2
   7 -11  -3  150.04    0.82   2
   7  -7   9    1.94    0.66   2
   8 -11   4    1.66    0.77   2
  12  -9   8    1.09    0.63   2
  13 -12   3   13.81    0.60   2
   9 -10   7    0.55    0.70   2
  11 -12   4  135.92    1.06   2
  11 -11   6   13.64    0.71   2
  12 -12   4    5.86    0.70   2
   5  -5   9  102.79    0.61   2
   8  -8   9   54.33    0.83   2
   9  -7  10   44.91    0.79   2
  10  -7  10   39.69    0.76   2
  12 -11   6   11.86    0.60   2
  12  -8   9    0.79    0.62   2
   4  -5   8   85.23    0.52   2
   5  -9   4  227.50    0.86   2
   6  -9   6  244.79    0.95   2
   7  -6  10    2.08    0.61   2
   8 -12   0   49.27    0.81   2
   9 -12   3    4.55    0.70   2
  10 -12   4   54.02    0.83   2
  12 -13  -1    1.04    0.64   2
  12 -13   0   12.07    0.69   2
   6 -10   4    1.82    0.62   2
   6  -5  10   34.89    0.57   2
   8 -12   1   29.24    0.80   2
   9 -11   6  299.26    1.30   2
  11 -13  -1   70.38    0.80   2
  11 -13   0   51.78    0.83   2
  11 -13   1    2.19    0.75   2
  11  -7  10    4.25    0.60   2
  12 -13  -2   11.31    0.61   2
  12 -13   1    9.15    0.68   2
  13 -12   4   48.28    0.65   2
   4  -8   4  123.03    0.60   2
   4  -7   6    0.31    0.37   2
   8 -12  -2    3.71    0.66   2
   8 -10   7    6.08    0.69   2
   8  -7  10    0.82    0.66   2
  10  -9   9    8.73    0.81   2
  11 -13  -2    2.34    0.69   2
  12 -12   5   62.76    0.81   2
  13 -13   0    3.80    0.57   2
  13 -11   6   38.50    0.64   2
   9 -12   4    3.00    0.83   2
  10 -13  -1    2.05    0.72   2
  10 -13   0  107.04    0.97   2
  11 -11   7    0.11    0.78   2
  11  -9   9    1.78    0.70   2
  13 -13   1   42.71    0.64   2
   4  -4   9   69.73    0.49   2
   5 -10  -1   54.11    0.55   2
   5 -10   0  153.71    0.74   2
   5 -10   1  116.90    0.71   2
   6  -7   9  160.73    0.88   2
   7 -11   4   42.89    0.73   2
   7  -8   9   23.51    0.75   2
   8 -12  -3   82.29    0.76   2
   9 -10   8   70.65    1.02   2
   9  -9   9   66.27    0.91   2
  10 -13  -2   20.42    0.78   2
  10 -13   1   12.71    0.81   2
  12 -11   7  126.19    0.90   2
  12 -10   8    2.11    0.61   2
   4  -9  -1  119.43    0.56   2
   4  -9   0    1.19    0.38   2
   4  -9   1  106.54    0.59   2
   5 -10  -2  345.96    0.91   2
   5  -9   5  216.54    0.85   2
   5  -7   8   70.64    0.61   2
   6 -11  -1  361.24    1.08   2
   6 -11   0   54.70    0.71   2
   6 -10   5  218.81    1.00   2
   8 -12   3    6.30    0.83   2
   9  -8  10  245.13    1.19   2
  10  -8  10    8.13    0.71   2
  11 -13   3   64.93    0.91   2
  12 -13   3   22.66    0.74   2
  12  -9   9   15.01    0.64   2
  13 -12   5    0.32    0.51   2
   4  -8   5    5.19    0.45   2
   5  -8   7   60.75    0.67   2
   5  -6   9    7.40    0.51   2
   6 -11   1    8.30    0.64   2
   6  -9   7  100.01    0.78   2
   7  -7  10   50.87    0.79   2
   8 -11   6   21.21    0.74   2
  11  -8  10    0.88    0.63   2
   6  -6  10   19.33    0.59   2
   8  -9   9    9.97    0.82   2
   9 -13   0   -0.29    0.74   2
   9 -12   5    0.96    0.71   2
   9 -11   7   70.89    0.86   2
  10 -13   3   43.33    0.89   2
  11 -12   6    1.95    0.75   2
  12 -12   6   19.77    0.67   2
  13 -13   3    1.23    0.52   2
   4  -6   8   13.84    0.46   2
   5 -10   3  222.77    0.92   2
   8 -10   8   31.11    0.88   2
   8  -8  10  125.49    0.96   2
   9 -13   1    2.36    0.77   2
  10 -12   6   11.15    0.84   2
  11 -13   4    4.13    0.76   2
  12 -13   4   30.89    0.71   2
   6 -11   3  259.23    1.07   2
   7 -12  -1  479.76    1.27   2
   7 -12   0   58.24    0.80   2
   7 -12   1    8.49    0.73   2
   9 -13  -2    2.32    0.71   2
  10 -10   9  151.44    1.05   2
  11 -10   9   58.26    0.86   2
   4  -9   3  354.02    0.93   2
   5  -9   6  344.67    1.04   2
   5  -5  10   46.62    0.53   2
   6 -10   6   69.73    0.81   2
   9  -7  11  149.13    1.00   2
  10 -13   4    4.44    0.82   2
  10 -11   8    3.80    0.83   2
   3  -7   5  234.45    0.73   2
   4  -5   9    6.79    0.40   2
   5 -10   4    6.55    0.62   2
   7 -12  -2   21.88    0.65   2
   7  -6  11   25.25    0.68   2
   8 -12   5    4.23    0.81   2
   8 -11   7  195.30    1.14   2
   9 -12   6   23.75    0.89   2
   9 -10   9   23.90    0.87   2
  10  -9  10   94.93    0.91   2
   4  -8   6  341.04    0.94   2
   6 -11   4    7.28    0.70   2
   6  -9   8   37.95    0.79   2
   7 -12   3   20.36    0.82   2
   7 -11   6  100.16    0.95   2
   7  -9   9   85.54    0.91   2
   8  -7  11   82.01    0.85   2
   9  -9  10   94.51    0.96   2
  11 -13   5    7.87    0.78   2
  11 -12   7   57.00    0.85   2
  11  -9  10    2.47    0.64   2
  12 -13   5   21.81    0.66   2
  12 -10   9    2.45    0.57   2
   4  -9   4  126.05    0.70   2
   6  -7  10    5.85    0.62   2
   7  -8  10    9.26    0.74   2
   9 -11   8   17.93    0.87   2
  10 -12   7  101.44    0.99   2
  11 -14   0   18.76    0.78   2
  12 -14  -1   23.39    0.65   2
  12 -14   0   44.23    0.67   2
  12 -14   1   22.51    0.68   2
  12 -12   7    4.80    0.62   2
   3  -8   3  125.77    0.60   2
   8 -13   0   39.81    0.85   2
   9 -13   4    0.92    0.80   2
  10 -13   5    1.15    0.78   2
  11 -14  -1   39.67    0.73   2
  11 -14   1   91.29    0.88   2
   5 -10   5  243.76    1.00   2
   5  -9   7   61.88    0.75   2
   6 -10   7  217.05    1.07   2
   7 -12   4    8.10    0.78   2
   8 -13  -1   11.15    0.72   2
   8 -13   2   67.04    0.96   2
   8  -9  10    6.16    0.78   2
  10  -8  11   57.67    0.82   2
  11 -14   2   14.26    0.72   2
   5  -6  10    5.07    0.52   2
   6 -11   5   82.95    0.86   2
   8 -13  -2  328.25    1.14   2
   8 -12   6  157.55    1.01   2
   9 -12   7  119.75    1.05   2
  10 -14   0   15.85    0.70   2
  10 -14   1   21.02    0.76   2
  11 -14  -2    0.93    0.59   2
  11 -13   6    5.89    0.72   2
  12 -14   3  121.55    0.87   2
   3  -8   4   11.93    0.43   2
   3  -7   6  153.20    0.65   2
   4  -9   5  182.02    0.82   2
   4  -6   9   22.12    0.50   2
   7 -11   7   99.40    0.96   2
   8 -11   8  146.84    1.06   2
   9 -13   5    4.58    0.85   2
  10 -14  -1   11.45    0.72   2
  11 -11   9    0.70    0.65   2
  12 -13   6   66.35    0.71   2
   5 -11   0    0.80    0.55   2
   5 -11   1   71.08    0.70   2
   7 -12   5   41.06    0.88   2
   8  -8  11    4.70    0.70   2
  10 -13   6   66.15    0.88   2
  10 -10  10   41.73    0.81   2
  11 -12   8    6.45    0.73   2
  11 -10  10    1.49    0.63   2
   3 -11   0   58.66    0.75   3
   4 -14  -5   92.40    0.94   3
   8 -16  -7    1.18    0.63   3
   8 -16  -6    0.57    0.57   3
   3 -10   1   14.58    0.57   3
   4 -14  -6   12.46    0.86   3
   4 -11   1    5.01    0.67   3
   4 -10   2  341.92    1.01   3
   7 -15  -3    9.25    0.74   3
   9 -16  -6    0.21    0.60   3
  10 -12   1    3.65    0.72   3
   1  -9  -1  148.24    0.67   3
   2 -11  -2  271.89    1.01   3
   3 -13  -5    1.57    0.76   3
   3 -12  -2   53.58    0.83   3
   4 -14  -7  189.73    1.07   3
   5  -9   3  131.13    0.76   3
   7 -14  -1   70.10    0.91   3
   9 -11   2    0.62    0.69   3
  10 -13   0   91.13    0.93   3
  11 -14  -2    2.29    0.75   3
   5 -13  -1   25.70    0.77   3
   6 -12   1  358.64    1.30   3
   6 -11   2   24.64    0.78   3
   8 -15  -3   44.91    0.94   3
   8 -14  -1  233.43    1.27   3
   9 -14  -1   49.72    0.99   3
  11 -12   0   11.38    0.76   3
  12 -13  -2   12.16    0.60   3
   1 -10  -3   55.67    0.59   3
   3 -13  -6  129.44    0.96   3
   6 -15  -9    4.78    0.67   3
  11 -13  -1   62.98    0.80   3
   2 -12  -7  147.83    0.94   3
   3 -13  -7   35.89    0.74   3
   6 -15  -8    4.59    0.70   3
   6 -15  -7    9.17    0.74   3
   6  -9   3    5.86    0.55   3
   7 -13   0  176.35    1.16   3
   8 -11   2   84.46    0.89   3
   9 -12   1    4.69    0.84   3
   4 -12  -1  369.22    1.22   3
   5 -10   2  395.01    1.16   3
   7 -12   1    8.51    0.86   3
   7  -9   3   62.16    0.71   3
   8 -15  -4   26.17    0.87   3
   8 -13   0   43.10    0.99   3
  10 -15  -4    5.49    0.74   3
   2 -11  -3   18.27    0.65   3
   3 -12  -3   39.62    0.82   3
   6 -14  -3  106.08    1.05   3
   7 -15  -5    3.05    0.73   3
   7 -14  -2    1.74    0.77   3
   9 -15  -4   38.38    0.88   3
   9 -10   2    5.52    0.73   3
  10 -11   1   62.83    0.87   3
  11 -14  -3    3.98    0.76   3
   2  -9   0  216.33    0.75   3
   4  -9   2   16.79    0.47   3
   5 -14  -5    4.51    0.86   3
   5 -13  -2   84.84    0.97   3
   8  -8   3    9.23    0.48   3
   1 -10  -4    5.51    0.51   3
   3  -9   1   71.64    0.60   3
   4 -13  -4    2.80    0.82   3
   4 -11   0  131.88    0.81   3
   4 -10   1    4.52    0.58   3
   7 -15  -6    2.48    0.70   3
   8 -14  -2    5.84    0.79   3
   9 -14  -2    4.48    0.78   3
  10 -15  -5    5.08    0.69   3
  10 -13  -1    2.42    0.79   3
  12 -13  -3    5.27    0.63   3
   5 -14 -10    3.26    0.63   3
   5 -14  -6   88.89    0.97   3
   6  -8   3  284.09    0.89   3
   7 -15  -9   58.93    0.77   3
   7 -15  -8   10.56    0.70   3
   7  -8   3    3.98    0.52   3
  11 -13  -2    3.68    0.79   3
   3 -12  -4  225.02    1.08   3
   5 -14  -9    0.52    0.73   3
   5 -14  -7   16.42    0.82   3
   6 -14  -4   26.77    0.93   3
   6 -11   1    7.92    0.75   3
   7 -14  -3  117.07    1.11   3
   7 -13  -1   11.69    0.89   3
   7 -10   2    4.90    0.70   3
   8 -10   2   17.52    0.70   3
  10 -15  -6   18.92    0.65   3
  11 -12  -1   70.86    0.83   3
   2 -10  -2    1.98    0.53   3
   4 -13  -5    4.82    0.82   3
   5 -12  -1   68.89    0.89   3
   8 -13  -1   11.78    0.90   3
   9 -15  -6   71.68    0.87   3
   9 -11   1   26.95    0.79   3
   9  -9   2   28.00    0.67   3
  11 -14  -4    5.22    0.68   3
   1 -10  -5   11.14    0.52   3
   5 -13  -3   15.79    0.78   3
   9 -14  -3    6.88    0.86   3
   9 -12   0    3.73    0.81   3
  10 -15  -7    0.90    0.57   3
   3 -12  -5  104.44    0.97   3
   4 -13  -6   42.41    0.87   3
   4  -8   2  389.64    0.93   3
   6 -14  -5  262.49    1.28   3
   7  -7   3  641.31    1.13   3
   8 -11   1    0.93    0.77   3
   9 -15  -7   -0.14    0.66   3
  12 -13  -4   14.27    0.62   3
   2 -11  -5  223.92    0.97   3
   4 -13 -10   14.31    0.68   3
   5 -10   1  111.96    0.79   3
   6 -14 -11    7.68    0.60   3
   7 -14  -4   12.62    0.89   3
  10 -13  -2   17.23    0.85   3
   1  -9  -3  328.49    0.87   3
   4 -13  -9   33.44    0.82   3
   4 -13  -8  197.87    1.11   3
   4 -13  -7    2.83    0.81   3
   5 -13  -4   10.08    0.89   3
   8  -9   2  105.11    0.74   3
  10 -14  -4   12.21    0.70   3
  10 -11   0   45.47    0.81   3
  11 -13  -3    2.44    0.74   3
  12 -12  -3   67.61    0.77   3
   3 -12  -6   72.23    0.85   3
   3 -10  -1  133.79    0.77   3
   6 -14 -10   14.52    0.69   3
   8 -14  -4    1.78    0.88   3
   9 -14  -4    2.11    0.86   3
   9 -13  -2    1.34    0.89   3
  11 -11  -1    0.63    0.75   3
   2 -11  -6   62.74    0.73   3
   2 -10  -3    5.95    0.56   3
   3 -11  -3   48.73    0.76   3
   4 -10   0   12.34    0.51   3
   4  -9   1  111.10    0.64   3
   5 -12  -2  280.94    1.21   3
   6 -14  -9    0.79    0.74   3
   6 -14  -8    1.88    0.76   3
   6 -14  -7   16.62    0.85   3
   7 -14  -5   39.95    0.94   3
   7  -9   2   34.84    0.65   3
   8 -13  -2  336.21    1.41   3
   9 -10   1   42.78    0.76   3
  11 -14  -6   22.80    0.68   3
  11 -12  -2    2.59    0.73   3
  12 -13  -5    0.74    0.61   3
   3 -12  -9  229.53    1.08   3
   3 -12  -7   36.69    0.77   3
   3  -9   0    7.27    0.43   3
   6 -10   1  592.63    1.38   3
  10 -14  -5   25.85    0.84   3
   2 -11  -7  177.72    0.89   3
   7 -14 -11    2.28    0.61   3
   7 -14  -6   78.94    1.01   3
   7 -12  -1  455.60    1.46   3
   8 -14  -5    3.35    0.90   3
   9 -14  -5    9.75    0.85   3
   9 -11   0    7.22    0.79   3
  11 -14  -7    3.28    0.63   3
   1  -9  -4   40.05    0.55   3
   2 -11  -8  361.09    1.13   3
   7 -13  -3   22.50    0.95   3
   8 -12  -1   19.45    0.92   3
   8 -10   1    4.01    0.70   3
   8  -8   2  111.41    0.68   3
  11 -13  -4    0.15    0.72   3
  12 -13  -6   41.40    0.68   3
  12 -12  -4   13.74    0.75   3
   5 -13 -11   13.95    0.72   3
   5 -13  -6   51.34    0.95   3
   6 -13  -4    0.93    0.86   3
   7 -14 -10   21.84    0.74   3
   7 -14  -7   10.15    0.90   3
   7 -11   0  309.87    1.18   3
  10 -14  -6    2.35    0.62   3
  10 -10   0   40.31    0.81   3
   2  -9  -2  218.11    0.78   3
   3 -11  -4  424.05    1.24   3
   5 -12  -3  130.55    1.00   3
   5  -9   1   43.05    0.59   3
   6 -12  -2    3.85    0.82   3
   6  -8   2   56.26    0.57   3
   7 -14  -9    8.30    0.77   3
   7  -8   2  140.82    0.76   3
   8 -13  -3   27.41    0.94   3
   9 -13  -3   77.36    0.90   3
   9  -9   1  472.59    1.25   3
  10 -14  -7   76.74    0.82   3
  10 -12  -2    3.60    0.80   3
  11 -10  -1   14.00    0.73   3
  12 -11  -3   77.42    0.78   3
   3 -10  -2  114.47    0.76   3
   4 -12  -5  242.92    1.14   3
   5 -13  -7    1.63    0.84   3
   5 -10   0  159.35    0.84   3
   8 -14  -7    9.76    0.83   3
  10 -14  -8   25.77    0.67   3
  10 -11  -1   48.45    0.88   3
  11 -12  -3   46.08    0.85   3
   5 -13  -9   22.13    0.80   3
   5 -13  -8    2.07    0.83   3
   8 -14  -8    1.75    0.78   3
   8  -7   2  531.32    1.08   3
   9 -14  -7  100.23    0.95   3
  10 -14  -9    1.75    0.56   3
  11 -11  -2   31.22    0.78   3
   1  -9  -5  100.47    0.63   3
   4  -8   1    2.65    0.37   3
   6 -13 -12   28.11    0.69   3
   7 -12  -2   17.80    0.88   3
   8 -14  -9   28.26    0.72   3
   9 -14 -10    1.06    0.56   3
   9 -14  -9   30.86    0.74   3
   9 -14  -8    5.50    0.75   3
  12 -12  -5  118.52    0.85   3
   3 -11  -5    1.78    0.71   3
   3  -9  -1   63.50    0.58   3
   4 -12  -6   10.97    0.81   3
   4 -11  -3    7.34    0.71   3
   4  -9   0    1.19    0.46   3
   6 -11  -1  349.86    1.17   3
   8 -13  -4   70.67    1.04   3
   8  -9   1    2.03    0.59   3
   9 -13  -4    1.18    0.85   3
   2 -10  -5   46.15    0.64   3
   4 -12 -11   23.38    0.71   3
   5 -12  -4  397.20    1.36   3
   6 -13  -6   56.72    0.98   3
   6 -10   0  150.47    0.89   3
   7  -9   1  386.32    1.13   3
   9 -11  -1   25.74    0.83   3
  10 -13  -5    4.13    0.80   3
  10  -9   0  152.49    0.87   3
  12 -11  -4   48.48    0.79   3
   4 -12  -7    7.58    0.82   3
   5 -11  -2    0.43    0.60   3
   6 -13 -11    8.00    0.69   3
   7 -13  -5   53.91    0.96   3
   7 -11  -1  250.74    1.17   3
   7  -7   2    6.11    0.40   3
  10 -12  -3  100.55    0.99   3
  11 -12  -4    2.39    0.74   3
  12 -12  -6   15.02    0.67   3
   1  -9  -6    4.57    0.48   3
   2  -9  -3  216.39    0.78   3
   3 -11  -6   50.40    0.77   3
   4 -12 -10   15.41    0.71   3
   4 -12  -9   65.10    0.91   3
   4 -12  -8    2.21    0.77   3
   8 -10   0    1.29    0.70   3
   9 -13  -5    2.35    0.85   3
  11 -13  -7    1.92    0.59   3
   2 -10  -6  121.78    0.81   3
   5 -12  -5   16.02    0.87   3
   6 -13 -10   23.73    0.81   3
   6 -13  -9    5.47    0.79   3
   6 -13  -8   45.34    0.95   3
   7 -13 -12    1.44    0.62   3
   7 -12  -3  211.42    1.17   3
  10 -13  -6   44.95    0.84   3
  10 -11  -2  160.14    1.07   3
  11 -13  -8   18.93    0.67   3
  11 -11  -3   14.16    0.75   3
  11 -10  -2   31.60    0.79   3
   3 -11  -7    9.14    0.74   3
   5 -10  -1   52.09    0.69   3
   5  -8   1   84.62    0.54   3
   7 -13  -6   11.00    0.78   3
   8 -12  -3   90.79    1.02   3
   9 -12  -3   10.82    0.78   3
  12 -12  -7   25.81    0.66   3
   1  -9  -7    6.40    0.53   3
   3 -11 -10   69.01    0.84   3
   4 -10  -2  102.97    0.70   3
   5  -9   0    4.27    0.50   3
   6 -12  -4   12.95    0.83   3
   6 -11  -2   12.94    0.76   3
   8 -13  -6   55.48    0.97   3
  12 -11  -5    8.18    0.69   3
   2 -10  -7   29.18    0.61   3
   3 -11  -8   71.38    0.81   3
   5 -12 -12    8.28    0.73   3
   5 -11  -3   85.64    0.87   3
   7 -13 -11    1.84    0.69   3
   7 -13  -7    3.09    0.73   3
   8 -13 -12  135.14    0.84   3
   9  -9   0   24.50    0.64   3
   1  -8  -4    7.84    0.38   3
   3  -9  -2  167.71    0.74   3
   6  -8   1  548.08    1.14   3
   7 -13 -10    3.38    0.76   3
   7  -8   1  222.68    0.85   3
   9 -13  -7    3.79    0.79   3
   9 -10  -1   30.82    0.78   3
  10 -13 -10    5.28    0.57   3
  10 -13  -9   13.36    0.67   3
  10 -13  -8    6.73    0.74   3
  12 -10  -4   71.65    0.77   3
   2  -9  -4  539.97    1.12   3
   4  -9  -1  126.89    0.66   3
   6 -10  -1  157.88    0.90   3
   7 -11  -2  481.21    1.37   3
   8 -11  -2  349.71    1.34   3
   9 -13 -11    1.78    0.65   3
   9 -12  -4    3.77    0.84   3
   4  -8   0   11.61    0.39   3
   5 -12 -11   90.11    0.86   3
   5 -12  -7    3.33    0.74   3
   6 -12 -13   26.87    0.65   3
   6  -9   0  114.18    0.70   3
   8 -13 -10  113.60    0.99   3
   8 -13  -9   25.84    0.89   3
   8 -13  -8   92.70    1.00   3
   8  -9   0  472.17    1.26   3
   9 -13 -10  112.52    0.89   3
   9 -13  -9    8.76    0.77   3
   9 -13  -8  111.86    0.98   3
  10 -11  -3   20.81    0.85   3
  10  -9  -1   11.75    0.73   3
  11 -11  -4   40.46    0.83   3
  11  -9  -2    6.28    0.68   3
  12 -11  -6   95.69    0.84   3
   5 -12  -9   12.61    0.83   3
   5 -12  -8    3.61    0.80   3
   7 -10  -1  388.15    1.26   3
  10 -10  -2   20.43    0.79   3
  11 -10  -3   69.99    0.89   3
   5 -11  -4   44.22    0.84   3
   6 -11  -3   35.33    0.72   3
   8  -7   1    5.03    0.46   3
   3 -10  -5  735.09    1.44   3
   4 -11 -12   96.66    0.89   3
   6 -12 -12   24.67    0.79   3
   6 -12  -6   70.18    0.87   3
   7 -12  -5  138.75    1.01   3
   9 -12  -5   27.68    0.92   3
   9  -8   0   31.67    0.60   3
  11 -12  -8   41.72    0.77   3
  12 -11  -7    1.36    0.66   3
  12 -10  -5   20.21    0.71   3
   2  -9  -5  486.35    1.09   3
   7 -12 -13   54.30    0.74   3
   8 -12  -5    4.42    0.88   3
  10 -12  -6   14.78    0.85   3
  11 -12 -10    7.68    0.57   3
  11 -11  -5    3.80    0.76   3
   4 -11  -7    4.69    0.76   3
   5  -8   0  193.80    0.74   3
   6 -12 -11   13.36    0.87   3
   6 -12  -7   89.51    1.03   3
   6  -7   1    4.33    0.41   3
   7  -7   1  473.25    1.03   3
   8 -11  -3   80.41    0.96   3
  10 -11  -4   26.76    0.88   3
   2  -8  -3  256.69    0.76   3
   3 -10  -6  206.09    0.95   3
   4 -11  -8    8.98    0.88   3
   5 -11  -5   11.81    0.83   3
   6 -10  -2  118.82    0.87   3
   7 -12  -6    4.19    0.77   3
   8 -12 -13   70.00    0.75   3
   9 -12  -6   42.55    0.95   3
   9  -9  -1   67.14    0.78   3
  10 -12  -7  172.78    1.11   3
  10  -8  -1   21.31    0.68   3
  12 -11  -9    1.56    0.57   3
   4 -11 -10   27.43    0.82   3
   4 -11  -9    0.79    0.78   3
   4 -10  -4  120.13    0.84   3
   4  -9  -2   53.44    0.55   3
   6 -12 -10    4.32    0.83   3
   6 -11  -4    7.43    0.69   3
   7 -12 -12    2.60    0.70   3
   8 -12  -6    3.53    0.92   3
   8  -8   0   24.28    0.64   3
   8  -6   1   48.81    0.51   3
  11 -10  -4   33.96    0.84   3
  12 -10  -6    1.48    0.71   3
   1  -8  -6    7.65    0.39   3
   2  -9  -6  477.31    1.13   3
   5 -11 -13   22.44    0.79   3
   5 -10  -3    3.88    0.66   3
   7 -12  -7    7.57    0.94   3
   7 -10  -2    4.28    0.78   3
   9 -12 -12    7.79    0.64   3
  10 -12 -11   23.11    0.65   3
  10 -12  -8   67.58    0.90   3
  10 -10  -3   -0.09    0.80   3
  10  -9  -2   10.66    0.77   3
  11 -11  -6    1.52    0.78   3
  11  -9  -3   24.60    0.74   3
   3 -10  -7    9.71    0.66   3
   6  -9  -1   39.94    0.59   3
   7 -12 -11   29.52    0.89   3
   7 -12  -8    6.36    0.88   3
   7 -11  -4  241.42    1.21   3
   7  -8   0  183.51    0.82   3
   8 -12  -7    3.28    0.94   3
   8  -9  -1  134.31    0.89   3
   9 -12  -7   94.62    0.94   3
   9  -7   0   10.71    0.49   3
  10 -12 -10   23.02    0.66   3
  10 -12  -9    1.35    0.64   3
  12  -9  -5    4.16    0.71   3
   3 -10 -11   28.00    0.76   3
   3  -8  -2   15.19    0.38   3
   5 -11  -6   19.51    0.76   3
   6 -11 -14    9.12    0.63   3
   7 -12  -9   21.38    0.97   3
   8 -11  -4   82.03    0.98   3
   9 -12 -11   49.84    0.79   3
   9 -12  -8    0.28    0.84   3
  12 -10  -7   64.30    0.77   3
   3 -10 -10    2.55    0.72   3
   3 -10  -8  376.13    1.18   3
   5 -11 -12   91.34    0.94   3
   6 -11  -5   35.38    0.84   3
   8 -12 -11   46.24    0.82   3
   8 -12 -10    3.68    0.84   3
   8 -12  -8    3.58    0.87   3
   9 -12 -10   31.57    0.83   3
   9 -12  -9   18.94    0.85   3
   1  -8  -7   62.54    0.51   3
   2  -9  -7  214.85    0.85   3
   3 -10  -9   95.31    0.83   3
   8 -12  -9   10.95    0.76   3
   9 -10  -3    5.97    0.83   3
  11 -10  -5    9.05    0.81   3
  12 -10  -8    7.91    0.74   3
   2  -9  -8  277.06    0.98   3
   2  -8  -4  201.78    0.71   3
   5  -9  -2    0.74    0.45   3
   7 -11 -14    3.60    0.65   3
   7 -11  -5   78.78    0.97   3
   9 -11  -5   10.34    0.74   3
   9  -8  -1   79.22    0.71   3
  10 -11  -6   21.56    0.91   3
  10 -10  -4   22.99    0.83   3
  11 -11 -11   13.44    0.62   3
  11 -11 -10   58.68    0.75   3
  11 -11  -9    3.45    0.71   3
   2  -9  -9   23.06    0.66   3
   4  -9  -3   24.76    0.51   3
   5 -11 -10    6.66    0.83   3
   5 -11  -9    2.07    0.81   3
   5 -10  -4  337.79    1.10   3
   6 -11 -13    9.96    0.71   3
   6 -11  -6   14.74    0.86   3
   7 -10  -3  274.06    1.15   3
   8 -11 -14   58.57    0.71   3
   8 -11  -5   80.56    1.00   3
   8 -10  -3   38.49    0.88   3
   8  -7   0  537.97    1.15   3
   9  -9  -2    2.63    0.70   3
  11  -9  -4    0.72    0.70   3
  11  -8  -3    0.89    0.63   3
  12 -10  -9   23.84    0.68   3
  12  -9  -6   25.49    0.74   3
   4 -10 -13  141.34    0.92   3
  10 -11  -7    3.46    0.86   3
  10  -9  -3   16.80    0.83   3
  10  -8  -2    3.54    0.64   3
   6  -9  -2    1.79    0.59   3
  10 -11 -12    9.23    0.61   3
  11 -10  -6    6.09    0.78   3
   6 -11 -12   45.47    0.86   3
   6 -11  -7   24.15    0.81   3
   7 -11 -13   31.95    0.78   3
   7 -11  -6    2.56    0.76   3
   7  -7   0  582.85    1.15   3
   8 -11  -6   70.52    1.03   3
   9 -11 -13   15.70    0.68   3
  10 -11  -8   18.63    0.84   3
   3  -8  -3   14.22    0.38   3
   4 -10 -12   32.36    0.79   3
   4 -10  -7   88.51    0.86   3
   4  -8  -2   19.73    0.48   3
   5 -10 -14   10.39    0.73   3
   5 -10  -5   10.59    0.74   3
   6 -11 -11    2.39    0.82   3
   6 -11  -8   67.43    1.00   3
   6 -10 -15    0.96    0.65   3
   6 -10  -4  111.40    0.82   3
   6  -8  -1  196.46    0.81   3
   6  -7   0   11.83    0.38   3
   7  -9  -2  205.37    0.93   3
  10 -11 -11    1.66    0.68   3
  10 -11 -10   28.44    0.78   3
  10 -11  -9   30.11    0.85   3
  10 -10  -5    0.33    0.84   3
   2  -8  -5  375.12    0.91   3
   6 -11 -10    5.95    0.89   3
   7 -11 -12    1.24    0.80   3
   7 -11  -7  158.45    1.16   3
   9 -11 -12   53.90    0.79   3
  11 -10  -7   27.71    0.82   3
  11  -9  -5   18.00    0.78   3
  12  -9  -8   82.30    0.87   3
   3  -9  -6 1423.89    1.87   3
   5  -9  -3    8.46    0.50   3
   7 -10  -4   12.48    0.69   3
   8 -11 -12  164.73    1.07   3
   8 -11  -7  118.15    1.01   3
   9 -11  -8  184.63    1.16   3
   9  -7  -1   44.96    0.62   3
  12  -8  -6    8.62    0.68   3
   4 -10 -10    6.94    0.79   3
   4 -10  -9  163.74    1.04   3
   7 -11  -8   17.05    0.92   3
   7 -10 -15   42.29    0.70   3
   8  -6   0  144.35    0.66   3
   9 -11 -11   20.07    0.79   3
   9 -11 -10   76.59    0.94   3
   9 -11  -9   48.90    0.94   3
   9  -9  -3   51.12    0.73   3
  10  -9  -4   53.11    0.86   3
  10  -7  -2   29.77    0.67   3
  11  -8  -4   28.66    0.72   3
  12  -9  -9    8.29    0.66   3
   5 -10 -13  197.96    1.05   3
   5 -10  -6   57.18    0.76   3
   6 -10  -5  517.36    1.43   3
   7 -11  -9   19.40    0.91   3
   8 -11 -11   12.84    0.87   3
   8 -11  -9   17.01    0.91   3
   8 -11  -8  158.49    1.08   3
   9  -8  -2   86.25    0.78   3
  11 -10 -11   20.99    0.60   3
  11 -10 -10    1.20    0.71   3
   2  -8  -6  241.43    0.80   3
   3  -9 -12  142.45    0.95   3
   3  -9  -7  217.03    0.92   3
   6 -10 -14   30.37    0.74   3
   6  -9  -3   62.52    0.71   3
   8 -11 -10   66.81    0.90   3
  10  -8  -3   10.75    0.68   3
  11  -9  -6  154.74    1.03   3
   5 -10  -7   77.18    0.93   3
   5  -8  -2  106.74    0.61   3
   7 -10  -5  117.75    1.00   3
   7  -9  -3  144.45    0.93   3
   9 -10 -14   19.32    0.63   3
  10 -10 -13    7.10    0.59   3
  10 -10  -7   60.72    0.99   3
   3  -9 -11    8.53    0.75   3
   4  -9 -14  135.73    0.96   3
   4  -9  -5   10.48    0.53   3
   5 -10 -12    3.36    0.81   3
   5  -9  -4   33.71    0.66   3
   7  -6   0   64.22    0.54   3
   8  -7  -1   85.20    0.65   3
   9 -10  -6   26.87    0.88   3
   3  -9  -9  130.67    0.85   3
   4  -8  -3   52.72    0.51   3
   6 -10  -6  427.11    1.31   3
   6  -9 -16    1.69    0.57   3
   7 -10 -14   14.34    0.75   3
   8  -8  -2   28.98    0.59   3
   9  -9  -4    7.30    0.80   3
   9  -6  -1    1.16    0.50   3
  10 -10 -12   12.01    0.70   3
  10 -10  -8    1.72    0.86   3
  10  -9  -5    8.85    0.81   3
  11  -9  -7  133.94    1.00   3
  11  -8  -5    3.46    0.72   3
  12  -8  -8   11.22    0.71   3
   5 -10 -11   40.21    0.91   3
   5 -10 -10    3.83    0.83   3
   5 -10  -9   55.17    0.92   3
   5  -9 -15   10.82    0.74   3
   6 -10 -13    1.65    0.79   3
   6  -8  -2  209.88    0.82   3
   8 -10  -6   22.86    0.89   3
   9 -10 -13    3.77    0.67   3
  10 -10 -11    1.70    0.75   3
  10 -10  -9    4.95    0.82   3
  11  -7  -4    9.45    0.66   3
  12  -8  -9   35.87    0.77   3
   1  -7  -7  422.32    0.92   3
   6 -10  -7    1.85    0.82   3
   7 -10  -6   30.16    0.79   3
   7  -7  -1  762.80    1.33   3
   9 -10  -7  415.66    1.48   3
  10 -10 -10   11.11    0.81   3
  11  -9 -12    8.52    0.64   3
  11  -9  -8   22.13    0.91   3
   4  -9 -13    5.01    0.81   3
   6 -10 -12   86.37    1.00   3
   6  -9  -4  126.84    0.87   3
   7 -10 -13  131.19    1.07   3
   8 -10 -13   47.00    0.89   3
   8  -9  -4   15.03    0.83   3
   9  -8  -3   11.03    0.72   3
   9  -7  -2    9.69    0.59   3
  12  -7  -7   35.27    0.78   3
   2  -8 -10    7.57    0.63   3
   5  -9  -5   33.20    0.70   3
   6 -10  -8    4.45    0.88   3
   7 -10  -7   68.90    0.98   3
   7  -9  -4  410.09    1.30   3
   8 -10  -7    9.41    0.92   3
   9 -10 -12    2.55    0.66   3
   9 -10  -8   97.44    1.06   3
  10  -9  -6   71.38    1.01   3
  10  -7  -3   16.50    0.66   3
  11  -9 -11    2.95    0.70   3
   1  -7  -8    8.99    0.43   3
   5  -8  -3   29.61    0.54   3
   6 -10  -9  152.77    1.14   3
   6  -9 -15    1.87    0.71   3
   8 -10 -12   35.09    0.91   3
   9 -10 -11   14.00    0.85   3
   9 -10 -10    1.20    0.83   3
   9 -10  -9  112.72    1.08   3
   4  -9 -12  168.15    1.03   3
   4  -8  -4   41.72    0.56   3
   5  -9 -14  118.06    0.94   3
   7 -10  -8  123.07    1.11   3
   8 -10  -8   19.68    0.94   3
  11  -7  -5    5.21    0.75   3
  12  -7  -8  154.96    0.92   3
   7 -10 -11   26.17    0.98   3
   7 -10 -10   26.93    0.94   3
   7 -10  -9  116.12    1.12   3
   7  -9 -15   19.03    0.76   3
   8 -10 -11  141.59    1.11   3
   8 -10 -10    8.92    0.89   3
   8 -10  -9   42.19    0.99   3
   8  -8  -3   31.40    0.72   3
   8  -6  -1    6.04    0.44   3
  10  -9 -13    3.08    0.62   3
   3  -8  -6  434.40    1.06   3
   4  -9 -11    1.88    0.78   3
   5  -9  -6  112.59    0.88   3
   6  -9  -5   40.84    0.69   3
   6  -8  -3   43.60    0.65   3
   8  -9  -5   65.28    0.90   3
   8  -7  -2  248.85    0.92   3
   9  -9 -14   90.82    0.82   3
  10  -8  -5    1.79    0.77   3
  11  -8  -7   70.26    0.91   3
  12  -7 -11    1.73    0.59   3
  12  -7 -10   15.94    0.68   3
  12  -7  -9    2.40    0.66   3
   4  -9 -10   35.08    0.82   3
   4  -9  -9   42.57    0.79   3
   4  -8 -15   11.12    0.70   3
   5  -9 -13    9.63    0.88   3
   5  -8 -16   15.80    0.66   3
   7  -8  -3  662.73    1.38   3
   9  -9  -6   23.80    0.90   3
  10  -9 -12    2.85    0.72   3
   5  -7  -2    1.00    0.37   3
   6  -9 -14   12.52    0.80   3
  10  -9  -9   53.86    0.96   3
  11  -8 -12    0.56    0.64   3
  11  -8  -8   42.47    0.87   3
   5  -9  -7   90.90    0.91   3
   6  -9  -6   32.93    0.79   3
   7  -9 -14   31.20    0.85   3
   7  -7  -2  229.16    0.85   3
   7  -6  -1  451.66    0.98   3
   8  -9 -14   32.46    0.82   3
   9  -9 -13    5.61    0.75   3
   9  -7  -3   88.05    0.79   3
   9  -6  -2   11.29    0.53   3
  10  -9 -10   15.11    0.74   3
  11  -8  -9   14.98    0.80   3
  11  -7  -6   13.73    0.75   3
  12  -6  -8   31.77    0.75   3
   3  -8 -12  196.17    1.04   3
   3  -8  -7  261.33    0.93   3
   4  -8  -5   14.07    0.54   3
   5  -9 -12   17.55    0.90   3
   5  -8  -4  694.54    1.30   3
   6  -8 -16   13.79    0.70   3
   6  -7  -2   38.47    0.49   3
   8  -9  -6   16.86    0.73   3
   9  -9  -7   28.67    0.81   3
  10  -8 -14    3.09    0.56   3
  10  -8  -6    7.06    0.81   3
  11  -6  -5    5.07    0.70   3
   2  -7  -6  507.34    1.01   3
   5  -9  -8   32.41    0.88   3
   6  -9 -13    9.44    0.88   3
   7  -9  -6   82.29    0.85   3
   7  -8 -16    2.67    0.69   3
   9  -9 -12   99.63    0.97   3
  12  -6 -11    2.55    0.60   3
  12  -6  -9   65.44    0.74   3
   3  -8 -11   53.95    0.85   3
   3  -8  -8  121.75    0.78   3
   4  -8 -14  126.24    0.93   3
   5  -9 -11    2.40    0.83   3
   5  -9 -10   29.62    0.87   3
   5  -8 -15  141.88    1.01   3
   6  -9  -7  160.80    1.03   3
   6  -8  -4  512.16    1.26   3
   8  -9 -13    3.30    0.82   3
   8  -9  -7  513.24    1.53   3
   9  -9  -8  212.24    1.13   3
   9  -8 -15    6.74    0.63   3
   9  -8  -5   30.27    0.83   3
  12  -6 -10   27.13    0.65   3
   3  -8  -9  420.11    1.18   3
   5  -7 -17   -0.81    0.61   3
   6  -9 -12  122.51    1.12   3
   7  -9  -7  402.39    1.39   3
   7  -8  -4   25.08    0.63   3
   8  -5  -1   77.79    0.55   3
   9  -9 -11    0.07    0.72   3
   9  -9 -10   77.11    1.02   3
   9  -9  -9   30.93    0.92   3
  10  -8 -13   20.11    0.71   3
  10  -8  -7   46.76    0.94   3
  11  -7  -7  126.74    0.98   3
   4  -8  -6   96.22    0.73   3
   6  -9  -8    7.85    0.85   3
   8  -9 -12  196.57    1.18   3
   8  -9  -8  248.46    1.25   3
   8  -7  -3  117.08    0.78   3
  10  -7  -5   17.70    0.77   3
   2  -7  -7 1446.88    1.68   3
   4  -8 -13  186.73    1.12   3
   4  -7 -16  239.56    1.04   3
   5  -8  -5  382.77    1.05   3
   6  -9 -10    0.93    0.92   3
   6  -9  -9   29.68    0.93   3
   6  -8 -15    1.49    0.77   3
   6  -7 -17   10.75    0.70   3
   7  -9 -12   11.08    0.85   3
   8  -9 -11    3.65    0.92   3
   8  -9  -9  128.02    1.10   3
   8  -8 -15   12.33    0.75   3
   9  -7  -4   11.56    0.71   3
  10  -8 -12   25.17    0.78   3
  10  -6  -4   28.12    0.76   3
  11  -7  -8  107.53    0.99   3
  11  -6  -6   55.12    0.86   3
   7  -9 -11  105.51    1.09   3
   7  -9  -9    9.43    0.90   3
   7  -8 -15    7.05    0.78   3
   8  -8  -5   50.59    0.84   3
   9  -8 -14    4.34    0.60   3
   9  -5  -2    3.56    0.45   3
  11  -7  -9   12.60    0.80   3
  12  -5 -10    3.14    0.61   3
   2  -7  -8   21.31    0.50   3
   5  -8 -14   -0.44    0.81   3
   6  -8  -5  976.34    1.69   3
   7  -9 -10   51.05    0.90   3
   9  -6  -3   77.74    0.71   3
  10  -8 -11    1.60    0.80   3
  10  -8 -10    4.48    0.90   3
  10  -8  -9    5.35    0.91   3
  11  -7 -11   16.01    0.73   3
  11  -7 -10   96.86    0.94   3
   3  -7 -14  113.47    0.94   3
   4  -8 -12  232.41    1.15   3
   4  -7  -4    9.35    0.44   3
   6  -7  -3  263.41    0.86   3
   7  -8  -5  158.71    0.89   3
  10  -7 -14   19.13    0.64   3
  10  -7  -6    0.65    0.82   3
   2  -7 -10  624.66    1.28   3
   2  -7  -9  592.94    1.21   3
   5  -8  -6   80.88    0.75   3
   5  -7 -16    4.10    0.83   3
   7  -6  -2    6.19    0.45   3
   8  -8 -14    2.42    0.78   3
   9  -8 -13    3.91    0.66   3
   9  -8  -7    7.71    0.87   3
  11  -6  -7    1.19    0.75   3
   4  -8 -11   13.31    0.80   3
   4  -8  -9   12.52    0.71   3
   4  -7 -15    9.63    0.81   3
   5  -8 -13  389.75    1.40   3
   6  -8 -14   72.28    0.97   3
   8  -8  -6   70.07    0.82   3
   8  -7 -16    0.53    0.64   3
   4  -8 -10   64.60    0.83   3
   6  -8  -6   17.46    0.71   3
   9  -8 -12   26.58    0.76   3
   9  -7 -15    9.47    0.57   3
   9  -7  -5   84.94    0.87   3
  10  -7 -13    6.74    0.69   3
  10  -7  -7   94.82    0.97   3
  10  -6  -5   35.26    0.74   3
  11  -6  -8  113.20    1.02   3
  11  -5  -6  321.76    1.14   3
   3  -7 -13   38.77    0.82   3
   5  -8  -7  114.26    0.86   3
   5  -7  -4   19.65    0.49   3
   6  -7 -16   31.79    0.82   3
   7  -8  -6   86.29    0.80   3
   7  -7 -16    0.70    0.69   3
   8  -8 -13   34.96    0.89   3
   9  -8 -11   41.08    0.93   3
   9  -8 -10   91.86    1.04   3
   9  -8  -9    4.09    0.91   3
  10  -5  -4  106.37    0.79   3
  11  -6 -12    4.12    0.68   3
   1  -6  -9   96.64    0.56   3
   5  -8 -12   37.20    0.91   3
   7  -8 -13  258.65    1.32   3
   7  -7  -4  311.25    1.03   3
   8  -8  -7  176.64    1.01   3
   8  -6  -3   11.36    0.56   3
  10  -7 -12   16.53    0.82   3
  10  -7  -8   16.40    0.90   3
  11  -6 -11   32.49    0.78   3
  11  -6 -10    2.47    0.83   3
  11  -6  -9   70.03    0.91   3
   4  -7  -5   33.95    0.47   3
   5  -8 -11   42.15    0.92   3
   5  -8  -8   26.98    0.78   3
   6  -8  -7   39.17    0.82   3
   6  -7  -4  664.34    1.33   3
   8  -8 -12   10.00    0.89   3
   8  -5  -2   41.37    0.52   3
   9  -7 -14   30.40    0.78   3
   9  -6  -4    9.88    0.65   3
   3  -7 -12   15.70    0.81   3
   3  -7  -7  239.46    0.84   3
   4  -7 -14   78.89    0.98   3
   5  -8  -9   14.88    0.84   3
   5  -7 -15    5.15    0.81   3
   5  -6 -17   34.85    0.79   3
   7  -8 -12    4.72    0.91   3
   8  -8 -11   93.71    1.08   3
   8  -8  -8   41.98    0.83   3
   8  -7 -15    4.89    0.65   3
   9  -7  -6  100.54    0.96   3
   9  -5  -3   78.67    0.66   3
  10  -7 -11    3.96    0.85   3
  10  -7 -10    0.25    0.95   3
  10  -6  -6   24.27    0.87   3
  11  -5  -7   91.73    0.86   3
   6  -8  -8  106.09    0.98   3
   6  -6 -17    6.70    0.79   3
   7  -8  -8  301.97    1.25   3
   7  -6 -17   31.00    0.69   3
   8  -8 -10    1.33    0.89   3
   8  -8  -9   79.90    0.91   3
  10  -6 -14   32.08    0.72   3
  11  -5 -13   35.11    0.67   3
   3  -7 -11   47.86    0.79   3
   3  -7  -8  436.93    1.11   3
   6  -8 -11    0.50    0.82   3
   6  -8 -10   87.51    1.04   3
   6  -8  -9   33.43    0.90   3
   6  -7 -15   68.68    0.94   3
   7  -8 -11  383.40    1.46   3
   7  -8  -9  283.67    1.28   3
   9  -7 -13    5.38    0.82   3
  11  -5  -8  121.53    1.00   3
   2  -6 -13   23.09    0.73   3
   3  -7  -9    5.02    0.58   3
   3  -6 -15  126.08    0.93   3
   4  -7  -6  266.41    0.89   3
   5  -7  -5  420.46    1.05   3
   5  -5 -18    2.47    0.67   3
   7  -8 -10  146.70    1.04   3
   7  -6  -3  341.17    0.92   3
   8  -7 -14   59.33    0.91   3
  10  -5  -5   23.15    0.72   3
  11  -5 -12    6.53    0.70   3
   4  -7 -13   38.24    0.89   3
   5  -7 -14   57.84    0.96   3
   6  -7  -5   34.24    0.65   3
   6  -6  -3  196.37    0.74   3
   7  -7  -5   22.19    0.60   3
   8  -6 -16    2.23    0.67   3
   9  -7 -12   75.44    0.98   3
   9  -6 -15    9.76    0.68   3
   9  -6  -5    7.14    0.71   3
  10  -6 -13    2.69    0.75   3
  10  -6  -7   16.45    0.83   3
  11  -5 -10   29.64    0.87   3
  11  -5  -9    1.76    0.74   3
   7  -5  -2   53.61    0.49   3
   8  -7  -6   61.57    0.77   3
   8  -6  -4    9.55    0.59   3
   9  -7  -8   57.09    0.97   3
  11  -4 -13    4.80    0.67   3
  11  -4  -7   21.58    0.75   3
   4  -7  -7   45.59    0.65   3
   5  -6 -16    1.96    0.83   3
   6  -7 -14   27.56    0.99   3
   7  -7 -14   36.71    0.85   3
   9  -7 -11   -0.41    0.77   3
   9  -7 -10  262.18    1.31   3
   9  -7  -9   28.11    0.91   3
   9  -5 -16   31.77    0.64   3
  10  -6 -12   15.80    0.83   3
  10  -6  -8    2.70    0.85   3
   2  -6 -12  103.46    0.79   3
   4  -7 -12  172.89    1.07   3
   5  -7  -6  221.84    0.89   3
   9  -6 -14    6.58    0.79   3
   9  -5  -4   25.15    0.65   3
   9  -4  -3  621.56    1.23   3
  10  -6  -9    2.67    0.87   3
  10  -5 -14   15.68    0.70   3
  10  -5  -6    1.71    0.78   3
  11  -4  -8    8.59    0.77   3
   3  -6 -14    5.13    0.71   3
   5  -7 -13   10.01    0.88   3
   6  -7  -6  488.13    1.27   3
   6  -6 -16    6.69    0.79   3
   7  -7  -6  162.85    0.89   3
   8  -7  -7   28.41    0.76   3
   8  -6 -15   18.31    0.80   3
   8  -5  -3   35.02    0.54   3
   8  -4  -2  100.84    0.56   3
   9  -6  -6    4.14    0.75   3
  11  -4 -12    2.96    0.70   3
   2  -6  -8 1081.73    1.46   3
   4  -7 -11   15.81    0.68   3
   4  -7 -10   15.58    0.74   3
   4  -5 -17   16.67    0.73   3
   7  -7 -13    4.49    0.77   3
   8  -7  -8  237.92    1.17   3
  10  -4  -5   64.34    0.79   3
  11  -4 -11    1.41    0.69   3
  11  -4  -9    7.24    0.74   3
   2  -6 -10   26.77    0.61   3
   2  -6  -9  705.12    1.26   3
   3  -5 -16  173.66    1.05   3
   5  -7 -12   35.54    0.93   3
   5  -7  -7  427.78    1.18   3
   7  -7  -7  524.48    1.40   3
   8  -7 -11   68.67    1.01   3
   8  -7  -9  170.58    1.12   3
   8  -6  -5   31.70    0.71   3
  10  -5 -13    8.82    0.79   3
  11  -4 -10    8.40    0.71   3
   5  -6  -4  881.08    1.33   3
   6  -7  -7   28.84    0.76   3
   6  -6  -4  368.36    0.98   3
   7  -7 -12    1.18    0.90   3
   7  -6 -15  108.30    1.03   3
   8  -7 -10  138.56    1.02   3
   9  -6  -7   58.75    0.91   3
   9  -5 -15   48.95    0.78   3
  10  -5  -7  185.89    1.09   3
   4  -4 -18   98.10    0.85   3
   5  -6 -15   10.54    0.88   3
   6  -7 -12    1.80    0.84   3
   6  -5 -17    0.76    0.73   3
   7  -7 -11   25.78    0.92   3
   7  -7  -8   15.72    0.82   3
   8  -6 -14    1.15    0.82   3
   8  -5 -16    4.06    0.72   3
   9  -5  -5    6.34    0.72   3
  11  -3 -12    5.32    0.63   3
  11  -3  -8  109.99    0.88   3
   4  -6 -14    9.10    0.83   3
   5  -7 -10   10.55    0.84   3
   5  -7  -9  102.43    0.91   3
   6  -7 -11   92.63    1.07   3
   6  -7  -8   25.88    0.79   3
   6  -6 -15   21.04    0.81   3
   7  -7 -10    9.93    0.89   3
   7  -7  -9  562.46    1.55   3
   7  -5  -3   90.08    0.59   3
   9  -6 -12    2.00    0.75   3
   9  -4 -16   76.12    0.72   3
  10  -5  -8   58.95    0.94   3
  10  -4 -14   20.81    0.70   3
  11  -3 -11    2.83    0.75   3
  11  -3  -9   17.43    0.78   3
   5  -4 -18   92.19    0.83   3
   6  -7 -10   39.53    0.90   3
   6  -7  -9    5.52    0.79   3
   6  -4 -18    6.72    0.65   3
   8  -4 -17   13.56    0.65   3
   9  -6 -11   25.17    0.93   3
  10  -5  -9   43.93    0.89   3
  10  -4  -6    3.08    0.68   3
  11  -3 -10   63.17    0.82   3
   2  -5 -14   35.94    0.73   3
   3  -6 -12   50.88    0.78   3
   7  -6 -14   12.13    0.87   3
   7  -6  -5  305.33    0.97   3
   8  -6 -13   27.80    0.90   3
   8  -5  -4   63.35    0.64   3
   9  -6 -10   53.75    0.85   3
   9  -5 -14    9.68    0.79   3
   9  -4  -4  125.78    0.75   3
  10  -5 -10    1.70    0.84   3
  11  -2 -12    2.33    0.61   3
   1  -5 -10    0.89    0.43   3
   1  -5  -9  564.44    1.04   3
   3  -6  -7  289.11    0.82   3
   3  -4 -17   19.41    0.78   3
   5  -6 -14    9.73    0.87   3
   5  -6  -5  626.09    1.20   3
   7  -5 -16   13.15    0.81   3
   3  -6 -11   27.77    0.68   3
   4  -6 -13   23.37    0.87   3
   6  -6  -5  778.41    1.36   3
   8  -6  -7    4.45    0.76   3
   8  -5 -15    2.69    0.76   3
   9  -5  -6  610.27    1.46   3
  10  -4  -7    7.87    0.79   3
  11  -2 -11   33.95    0.69   3
  11  -2 -10   13.07    0.71   3
  11  -2  -9   60.04    0.81   3
   3  -6 -10   26.98    0.63   3
   3  -6  -8   83.04    0.61   3
   4  -6  -6  180.18    0.73   3
   6  -5 -16   47.94    0.88   3
   7  -6  -6   20.39    0.67   3
   7  -4 -17   10.07    0.72   3
   8  -6 -12   11.70    0.78   3
   9  -5 -13   26.01    0.88   3
   9  -4 -15    3.34    0.71   3
   2  -5 -13  202.54    0.97   3
   3  -6  -9  180.28    0.82   3
   7  -6 -13   11.77    0.79   3
   8  -6 -11  107.28    1.07   3
   9  -3 -16   29.92    0.64   3
  11  -1 -11    3.51    0.60   3
   4  -6 -12  528.42    1.46   3
   4  -4 -17    2.61    0.82   3
   5  -6 -13  130.01    1.09   3
   6  -6 -13    6.52    0.96   3
   8  -6 -10    8.57    0.88   3
   8  -6  -9  176.93    1.09   3
   8  -5  -5  103.10    0.77   3
   8  -4 -16   27.71    0.67   3
   8  -3 -17   95.70    0.75   3
   9  -5 -12   22.26    0.87   3
   9  -5  -7    3.11    0.76   3
   9  -4  -5  397.22    1.17   3
  10  -4 -11   43.96    0.88   3
  10  -4  -8   24.85    0.83   3
  10  -3  -6   60.61    0.73   3
   4  -6  -7   78.14    0.63   3
   4  -5 -15    3.03    0.85   3
   5  -6  -6  353.96    0.97   3
   6  -6  -6   18.85    0.53   3
   6  -4 -17    7.02    0.74   3
   7  -6 -12   58.63    0.99   3
   7  -6  -7   32.45    0.74   3
   7  -5 -15   15.41    0.77   3
   8  -5 -14   20.02    0.75   3
  10  -4 -10   18.59    0.86   3
  10  -4  -9   70.68    0.93   3
   4  -6 -11   11.69    0.78   3
   5  -4 -17   11.54    0.78   3
   6  -3 -18   13.74    0.65   3
   9  -5 -11   27.11    0.89   3
   9  -5  -8  408.34    1.31   3
   9  -4 -14   92.49    0.94   3
   2  -5 -12   26.82    0.64   3
   4  -6  -8   45.39    0.58   3
   4  -3 -18   31.74    0.76   3
   5  -5 -15   63.91    1.00   3
   6  -6 -12  165.10    1.06   3
   6  -6  -7   43.03    0.68   3
   7  -6 -11  116.97    0.96   3
   7  -6  -8  451.85    1.33   3
   9  -5 -10  233.02    1.17   3
  10  -3  -7  279.43    1.10   3
  10  -2 -14   -0.64    0.62   3
   4  -2 -19    3.71    0.58   3
   5  -6 -11  163.05    1.10   3
   5  -3 -18    4.55    0.71   3
   6  -6 -11    4.44    0.82   3
   6  -5  -4   63.30    0.49   3
   7  -6 -10   41.11    0.79   3
   7  -6  -9  176.82    0.98   3
   7  -4 -16    9.87    0.81   3
   7  -4  -3  973.68    1.35   3
   8  -5 -13  151.35    1.11   3
   8  -5  -6   17.57    0.70   3
   8  -4 -15   15.51    0.79   3
   8  -4  -4    5.98    0.51   3
   9  -3 -15   45.71    0.76   3
   9  -2 -16   28.29    0.62   3
  10  -3 -12    1.26    0.75   3
   5  -6 -10   25.77    0.81   3
   5  -6  -8   14.12    0.64   3
   6  -6  -8   35.09    0.73   3
   7  -5 -14   52.88    0.85   3
   9  -4 -13    3.56    0.84   3
   9  -4  -6  231.57    1.02   3
  10  -3  -8   35.92    0.86   3
   4  -5 -14  121.44    1.05   3
   5  -6  -9    4.96    0.61   3
   6  -6 -10  198.96    1.02   3
   7  -3 -17    2.16    0.72   3
   8  -5 -12  155.79    1.13   3
   8  -3 -16    0.34    0.69   3
   8  -3  -3    4.68    0.41   3
   8  -2 -17    4.11    0.57   3
  10  -3 -11    3.57    0.77   3
  10  -3  -9  206.36    1.16   3
  10  -2 -13    8.81    0.70   3
  10  -1 -14    9.75    0.61   3
   2  -5 -10  421.91    1.03   3
   4  -4 -16    8.08    0.84   3
   5  -5 -14   10.81    0.92   3
   6  -5 -14   15.11    0.97   3
   9  -4 -12    9.02    0.89   3
   9  -4  -7   21.91    0.78   3
  10  -3 -10   16.19    0.82   3
   2  -5  -9  877.45    1.34   3
   3  -3 -17   45.47    0.87   3
   5  -4 -16    0.64    0.86   3
   7  -5 -13   52.65    0.99   3
   8  -5  -8  295.59    1.20   3
   8  -4 -14   25.09    0.86   3
   9  -3 -14    2.40    0.79   3
  10  -2  -7    4.27    0.71   3
   6  -5  -5  586.47    1.17   3
   7  -5  -6    4.92    0.59   3
   7  -4 -15   72.34    0.97   3
   8  -5 -10  114.40    1.02   3
   8  -5  -9  272.20    1.23   3
   8  -4  -5  434.00    1.12   3
   9  -4 -11    5.01    0.92   3
   9  -4  -8  120.85    0.97   3
   9  -2 -15    4.72    0.68   3
  10  -2 -12   28.86    0.79   3
   1  -4 -12  517.45    1.16   3
   2  -4 -14    5.56    0.65   3
   3  -5 -12   44.36    0.74   3
   3  -4 -15   66.85    0.89   3
   4  -5 -13    8.95    0.80   3
   5  -5  -5 1927.54    1.93   3
   9  -4  -9   66.98    0.98   3
  10  -2  -8   18.74    0.80   3
   3  -2 -18    5.00    0.74   3
   3  -1 -19   60.59    0.74   3
   4  -3 -17    1.29    0.76   3
   5  -3 -17   -0.12    0.74   3
   6  -5 -13   16.61    0.79   3
   7  -5 -12   13.53    0.77   3
   8  -3 -15   49.74    0.84   3
   9  -3 -13   55.49    0.91   3
  10  -2 -11   46.54    0.83   3
  10  -2  -9   10.56    0.81   3
   3  -5 -11  106.78    0.82   3
   5  -2 -18    7.46    0.77   3
   6  -4 -15   50.10    0.99   3
   7  -5  -7  437.24    1.22   3
   7  -3 -16    9.01    0.76   3
   8  -4 -13   41.08    0.92   3
   8  -2 -16   70.41    0.81   3
   9  -3  -6   84.97    0.78   3
  10   0 -13   45.48    0.73   3
   1  -4 -11  484.13    1.07   3
   4  -5 -12  174.19    1.05   3
   4  -2 -18   14.19    0.75   3
   4  -1 -19    6.70    0.62   3
   5  -4 -15   12.56    0.91   3
   6  -5 -12    9.41    0.84   3
   7  -5 -11   84.84    0.88   3
   7  -5  -8   12.22    0.71   3
   7  -4 -14   36.35    0.91   3
   7  -2 -17    6.14    0.69   3
   8  -4  -6   -0.26    0.61   3
   8  -3  -4    7.15    0.47   3
   9  -2 -14    2.32    0.74   3
   9  -1 -15   61.04    0.75   3
  10  -1 -12    6.73    0.70   3
   3  -5 -10  282.00    0.97   3
   3  -5  -9  126.18    0.69   3
   5  -5 -12   65.12    0.96   3
   5  -5  -6    1.60    0.45   3
   7  -5 -10    6.61    0.68   3
   7  -5  -9   80.14    0.86   3
   8  -2  -3  120.86    0.62   3
   9  -3 -12   20.72    0.89   3
   9  -2  -5    2.30    0.59   3
  10  -1 -11    1.18    0.74   3
  10  -1  -8    8.17    0.71   3
   1  -4 -10  359.56    0.89   3
   2  -4 -13   10.68    0.63   3
   6  -5 -11   84.26    0.93   3
   9  -3  -7    7.79    0.71   3
  10  -1 -10   14.40    0.79   3
  10  -1  -9  147.43    0.99   3
  10   0 -12    1.13    0.70   3
   2  -2 -17   59.43    0.80   3
   3  -3 -16  213.97    1.12   3
   5  -5 -11    2.16    0.79   3
   6  -3 -16   23.87    0.78   3
   7  -4  -5   44.50    0.56   3
   8  -4 -11  182.91    1.14   3
   8  -3 -14    1.45    0.71   3
   9  -3  -8  226.46    1.10   3
   5  -5  -7   41.76    0.52   3
   6  -5 -10    2.60    0.64   3
   6  -5  -9   75.14    0.82   3
   6  -5  -8   56.98    0.65   3
   6  -4 -14   46.17    0.83   3
   6  -2 -17    7.44    0.78   3
   7  -4 -13    2.14    0.86   3
   7  -3 -15   10.70    0.84   3
   8  -4 -10    4.02    0.82   3
   8  -2 -15    3.27    0.75   3
   9  -3 -10   61.60    0.95   3
   9  -3  -9   17.32    0.85   3
   9  -2 -13    6.32    0.83   3
  10   0 -11   86.71    0.91   3
  10   1 -12   19.70    0.61   3
   2  -3 -15  202.21    0.99   3
   4  -5  -9    0.98    0.51   3
   4  -4 -14  100.45    1.00   3
   4  -3 -16  158.86    1.10   3
   5  -5 -10    9.99    0.72   3
   5  -5  -8   22.88    0.63   3
   5  -3 -16   10.07    0.85   3
   8  -4  -9  248.68    1.17   3
   8  -3  -5  254.64    0.90   3
  10   0 -10   37.28    0.82   3
  10   0  -9   21.23    0.78   3
   2  -4 -12   93.50    0.73   3
   5  -5  -9   11.60    0.58   3
   7  -2 -16    3.76    0.76   3
   7  -1 -17    9.39    0.59   3
   8  -3 -13    8.03    0.88   3
   9  -2  -6    3.10    0.61   3
  10   1 -11    3.45    0.61   3
   3  -4 -13   80.91    0.85   3
   3  -2 -17   48.91    0.83   3
   3   0 -19   29.97    0.71   3
   4   0 -19    8.89    0.66   3
   5  -2 -17    6.89    0.80   3
   5  -1 -18    3.09    0.69   3
   6  -4 -13   23.61    0.89   3
   7  -4 -12   40.84    0.82   3
   3  -1 -18    4.84    0.81   3
   4  -2 -17    3.43    0.82   3
   6  -3 -15   21.02    0.90   3
   7  -3 -14   38.32    0.92   3
   8  -2  -4  194.37    0.76   3
   9  -2  -7   13.81    0.68   3
   2  -4 -11  149.31    0.76   3
   3  -3 -15  355.70    1.30   3
   4  -4 -13   60.88    0.91   3
   4  -1 -18   55.85    0.82   3
   5  -4 -13  220.55    1.20   3
   6   0 -18    4.03    0.62   3
   7  -4 -11   79.55    0.94   3
   7  -4  -7  576.39    1.32   3
   7  -3  -4   19.50    0.44   3
   8  -3 -12  180.60    1.15   3
   8  -3  -6  213.34    0.94   3
   8  -2 -14   18.71    0.84   3
   8   0 -16   53.06    0.72   3
   9  -2 -11   16.30    0.87   3
   1  -3 -13    8.36    0.54   3
   6  -4 -12  153.52    1.07   3
   6  -2 -16    5.01    0.83   3
   7  -4 -10   86.86    0.94   3
   8  -1 -15   67.57    0.86   3
   9  -2 -10   15.06    0.83   3
   9  -2  -9    3.99    0.79   3
   9  -2  -8   11.51    0.75   3
   2  -4 -10   24.65    0.51   3
   2  -3 -14  213.10    1.01   3
   3  -4 -12   11.71    0.69   3
   6  -1 -17   24.63    0.81   3
   7  -4  -9  101.80    0.89   3
   7  -4  -8   12.72    0.62   3
   7  -2 -15   55.25    0.94   3
   7   0 -17   13.01    0.58   3
   8  -3 -11   62.16    0.94   3
   8  -3  -7  645.59    1.44   3
   9  -1  -6  235.82    0.98   3
   9   1 -14    5.37    0.64   3
   2  -4  -9  289.60    0.82   3
   6  -4  -6  437.23    1.06   3
   7  -3 -13    6.51    0.90   3
   7  -1 -16    7.63    0.76   3
   8  -3 -10  267.58    1.24   3
   8   1 -16   36.57    0.67   3
   9  -1 -12   25.09    0.75   3
   9   0 -13    5.57    0.73   3
   5  -4 -12    3.54    0.71   3
   6  -3 -14   11.65    0.78   3
   8  -2 -13    6.76    0.75   3
   1  -3 -12    1.20    0.53   3
   2  -1 -17   17.38    0.81   3
   3  -4 -11   16.35    0.55   3
   3  -2 -16   69.58    0.95   3
   4   1 -19   37.13    0.68   3
   6  -4 -10  439.38    1.31   3
   6  -4  -7   87.29    0.69   3
   6   1 -18    6.45    0.61   3
   7  -3  -5  477.46    1.08   3
   8  -2  -5   97.10    0.67   3
   8  -1 -14    1.98    0.80   3
   8   0 -15    4.76    0.75   3
   9  -1 -11   13.17    0.82   3
   3  -3 -14   62.64    0.91   3
   3   1 -19   32.55    0.74   3
   4  -2 -16   14.02    0.86   3
   5  -4 -11   21.17    0.80   3
   5  -3 -14   24.00    0.93   3
   6  -4  -8   40.75    0.65   3
   7  -3 -12   75.41    0.99   3
   7   1 -17    5.43    0.61   3
   9  -1 -10   63.80    0.93   3
   9  -1  -8   75.83    0.90   3
   9   0 -12    0.37    0.84   3
   9   1 -13   78.54    0.85   3
   2  -3 -13  254.77    1.05   3
   2   0 -18   15.30    0.74   3
   3  -4 -10    3.85    0.53   3
   4  -3 -14  171.22    1.13   3
   4   0 -18    9.55    0.82   3
   6  -2 -15   45.65    0.93   3
   7  -2 -14    9.14    0.76   3
   8  -2 -12   20.41    0.77   3
   8  -1  -4   44.03    0.54   3
   9  -1  -9    6.95    0.78   3
   3  -1 -17   29.24    0.83   3
   3   0 -18    5.41    0.69   3
   5  -4 -10   18.41    0.70   3
   5  -4  -7   49.36    0.54   3
   6  -3 -13   65.07    0.86   3
   6  -1 -16   41.45    0.88   3
   6   0 -17    2.87    0.76   3
   7  -3  -6   14.17    0.55   3
   7  -1 -15   26.28    0.87   3
   7   0 -16   11.42    0.74   3
   8  -2  -6   99.42    0.75   3
   9   2 -13   19.59    0.69   3
   9   3 -13    1.07    0.62   3
   1  -3 -11    7.13    0.47   3
   2  -2 -15    7.14    0.73   3
   4  -4 -10   72.89    0.69   3
   4  -4  -7  432.72    1.01   3
   5  -4  -9    5.84    0.60   3
   5  -4  -8   49.91    0.62   3
   7  -3 -11  157.86    0.99   3
   7   2 -17   -0.89    0.56   3
   8  -2 -11   60.19    0.97   3
   8  -1 -13   68.34    0.97   3
   8   1 -15   80.75    0.86   3
   9   0 -11   40.85    0.85   3
   1  -2 -14  299.12    1.06   3
   4  -4  -9   68.91    0.62   3
   4  -4  -8  207.85    0.81   3
   5  -3 -13   21.27    0.88   3
   5  -2 -15   64.70    1.00   3
   7  -3 -10   22.94    0.81   3
   8  -2  -7    6.11    0.66   3
   9   0 -10   54.35    0.93   3
   9   0  -7   15.31    0.66   3
   9   1 -12    7.02    0.76   3
   3  -3 -13  229.90    1.09   3
   4   2 -19   32.98    0.66   3
   6  -3 -12    7.61    0.80   3
   7  -3  -9  142.02    0.97   3
   7  -3  -8    5.95    0.67   3
   7  -2 -13  163.14    1.05   3
   7  -2  -4    6.11    0.39   3
   8  -2  -8    1.65    0.71   3
   9   0  -9   15.44    0.75   3
   9   0  -8    1.74    0.69   3
   9   2 -12    4.33    0.73   3
   1  -3 -10  210.79    0.73   3
   2  -3 -12   49.69    0.67   3
   3  -2 -15  104.79    1.00   3
   4  -2 -15  130.19    1.07   3
   5  -1 -16   47.81    0.96   3
   6  -2 -14   15.59    0.87   3
   7   1 -16    1.02    0.70   3
   8  -1 -12  113.36    1.06   3
   8  -1  -5  108.44    0.71   3
   9   1 -11    7.41    0.75   3
   9   3 -12   84.25    0.76   3
   2   2 -19   94.53    0.78   3
   3   2 -19   38.90    0.67   3
   5   0 -17   24.68    0.75   3
   6   1 -17    8.50    0.70   3
   7  -1 -14  138.65    1.10   3
   2  -1 -16   56.68    0.85   3
   4   1 -18   30.23    0.73   3
   5  -3 -12   38.48    0.84   3
   6  -3 -11   42.45    0.74   3
   6  -1 -15    8.17    0.88   3
   7  -2 -12  109.41    1.01   3
   7   0 -15   12.97    0.72   3
   8   0 -13   37.53    0.93   3
   8   1 -14    3.73    0.80   3
   9   1 -10  139.94    0.96   3
   9   1  -8   41.69    0.77   3
   9   2 -11    4.18    0.69   3
   2  -2 -14   78.98    0.87   3
   3  -3 -12    4.61    0.66   3
   3  -1 -16   82.37    0.96   3
   4  -1 -16  103.23    1.02   3
   4   0 -17   38.38    0.85   3
   5  -2 -14    4.05    0.86   3
   5   2 -18   57.22    0.74   3
   7  -2  -5  103.30    0.62   3
   9   1  -9    4.95    0.70   3
   9   3 -11    1.85    0.63   3
   1  -2 -13   66.04    0.70   3
   2  -3 -11  293.45    0.94   3
   2   1 -18    2.95    0.73   3
   3   1 -18   62.75    0.83   3
   6  -3 -10   11.86    0.61   3
   6  -2 -13    2.81    0.82   3
   7   2 -16  113.12    0.81   3
   8  -1  -6   56.18    0.64   3
   9   2 -10   39.40    0.74   3
   1  -1 -15   31.33    0.74   3
   3   0 -17  135.21    1.03   3
   5  -3 -11   16.80    0.73   3
   6  -3  -9   19.25    0.65   3
   6  -3  -8   33.88    0.63   3
   6  -3  -7   18.69    0.48   3
   6   2 -17    2.95    0.67   3
   7  -2 -11  189.48    1.03   3
   7  -1 -13  125.22    1.08   3
   8  -1  -7  132.36    0.89   3
   9   2  -9   57.99    0.77   3
   9   3 -10   33.49    0.71   3
   3  -2 -14   99.00    0.86   3
   3   3 -19    7.45    0.59   3
   5  -1 -15    1.83    0.87   3
   5   1 -17    7.94    0.76   3
   7   1 -15    7.38    0.79   3
   7   3 -16   11.68    0.65   3
   8  -1  -9  140.13    0.98   3
   8  -1  -8   13.00    0.72   3
   8   3 -14    0.97    0.63   3
   8   4 -14   47.82    0.73   3
   2  -3 -10   18.77    0.48   3
   2   3 -19   44.19    0.73   3
   3  -3 -11   98.09    0.70   3
   4  -3 -11    4.56    0.65   3
   5  -3 -10   81.05    0.76   3
   5   0 -16   51.83    0.93   3
   5   3 -18   16.52    0.61   3
   6  -1 -14  118.97    1.07   3
   7  -2 -10  783.14    1.65   3
   7   0 -14   25.71    0.77   3
   8   0  -5   41.57    0.60   3
   4   2 -18    5.22    0.70   3
   5  -2 -13   50.91    0.88   3
   6  -2 -12   53.07    0.79   3
   6   0 -15   25.01    0.87   3
   6   1 -16   32.04    0.73   3
   6   3 -17   15.49    0.63   3
   7  -2  -9   17.31    0.76   3
   7  -1  -4  310.69    0.84   3
   2  -3  -9  194.60    0.71   3
   2  -2 -13   85.91    0.82   3
   2  -1 -15  346.03    1.27   3
   5  -3  -9   16.29    0.59   3
   7  -1 -12   19.31    0.77   3
   8   2 -13   85.71    0.91   3
   1  -2 -12  496.16    1.14   3
   1   2 -18   57.33    0.79   3
   3  -1 -15  279.72    1.27   3
   4  -3 -10   11.11    0.54   3
   5  -3  -8    9.46    0.45   3
   5  -3  -7  107.54    0.61   3
   6   4 -17    8.88    0.58   3
   7   2 -15    0.59    0.65   3
   8   0 -10    4.75    0.81   3
   8   0  -6    5.22    0.57   3
   8   5 -13    8.48    0.63   3
   1   1 -17   24.01    0.77   3
   2   2 -18  150.76    1.05   3
   3  -2 -13    8.93    0.76   3
   3   2 -18   38.78    0.79   3
   4  -3  -9    0.80    0.51   3
   5   2 -17   50.36    0.84   3
   6  -2 -11   21.68    0.71   3
   7   0 -13   35.26    0.92   3
   7   1 -14    7.97    0.86   3
   8   3 -13    2.69    0.72   3
   8   4 -13    8.37    0.70   3
   1  -1 -14   45.49    0.76   3
   2   0 -16   79.61    0.95   3
   3   0 -16   59.12    0.92   3
   4  -3  -8  102.96    0.64   3
   5  -2 -12   13.56    0.77   3
   6  -2  -5    8.69    0.41   3
   6  -1 -13  164.33    1.04   3
   6   2 -16    3.67    0.74   3
   7  -1 -11  229.08    1.09   3
   7   3 -15   23.11    0.77   3
   8   0  -9  141.96    0.97   3
   8   0  -8   83.12    0.84   3
   8   0  -7    6.30    0.62   3
   1   4 -19   32.14    0.63   3
   2   1 -17   63.22    0.90   3
   2   4 -19    1.83    0.61   3
   3   1 -17  141.76    1.05   3
   5   1 -16   51.87    0.91   3
   6  -2 -10  320.18    1.17   3
   7  -1  -5   34.88    0.49   3
   8   1 -11    3.35    0.71   3
   8   2 -12    7.53    0.79   3
   2  -2 -12   13.86    0.61   3
   5   0 -15    3.77    0.75   3
   6   0 -14   96.63    0.94   3
   6   1 -15   43.46    0.81   3
   7  -1 -10   13.03    0.81   3
   1  -2 -11  531.47    1.10   3
   4  -2 -12   74.93    0.79   3
   4  -1 -14  271.06    1.28   3
   5  -2 -11    5.56    0.70   3
   5   3 -17   -0.19    0.70   3
   6  -2  -9   20.88    0.61   3
   6   3 -16    4.14    0.74   3
   7   0 -12  203.22    1.09   3
   7   2 -14  140.13    1.06   3
   8   1 -10  218.78    1.12   3
   8   3 -12   10.76    0.75   3
   8   4 -12   14.55    0.75   3
   8   5 -12    1.70    0.64   3
   2  -1 -14  179.45    1.02   3
   3  -2 -12   50.45    0.70   3
   3  -1 -14   97.96    0.97   3
   3   3 -18    6.16    0.68   3
   4   4 -18    2.40    0.62   3
   6  -2  -8  295.35    0.97   3
   6  -2  -7  161.80    0.73   3
   6  -1 -12   34.48    0.78   3
   7  -1  -7   26.29    0.62   3
   7   1 -13  149.99    1.09   3
   8   1  -9    2.74    0.75   3
   8   2 -11   34.03    0.86   3
   1   0 -15   92.17    0.91   3
   4   0 -15   74.48    1.03   3
   5  -1 -13  107.39    0.92   3
   6   4 -16    1.93    0.68   3
   7   0  -4  169.13    0.67   3
   8   1  -8   92.33    0.83   3
   8   1  -7   75.21    0.78   3
   1   3 -18    4.09    0.71   3
   4   5 -18   44.85    0.69   3
   5  -2 -10    2.42    0.65   3
   6   0 -13   24.86    0.89   3
   6   2 -15    0.55    0.82   3
   6   5 -16    6.71    0.60   3
   7   0 -11    4.92    0.84   3
   7   3 -14   18.60    0.82   3
   8   2 -10   45.75    0.85   3
   8   3 -11    7.13    0.78   3
   8   5 -11    1.60    0.70   3
   1  -2 -10   66.27    0.50   3
   1  -1 -13   46.12    0.66   3
   2  -2 -11  195.07    0.83   3
   3   0 -15   46.51    0.90   3
   3   2 -17    1.05    0.78   3
   4  -2 -11    6.43    0.58   3
   5   0 -14    1.22    0.88   3
   5   2 -16    0.67    0.69   3
   6  -1 -11  372.57    1.29   3
   6   1 -14    5.41    0.88   3
   7   6 -14   10.15    0.60   3
   8   4 -11    6.05    0.69   3
   0  -1 -12   61.01    0.54   3
   1   1 -16   24.65    0.77   3
   1   2 -17    4.08    0.81   3
   3   1 -16   30.17    0.88   3
   4  -1 -13  176.15    1.07   3
   5  -2  -9   91.77    0.72   3
   5   1 -15   95.20    1.02   3
   5   5 -17    7.59    0.60   3
   7   1 -12   67.91    0.98   3
   7   2 -13   28.81    0.90   3
   7   5 -14    9.22    0.65   3
   8   2  -9   87.09    0.90   3
   8   3 -10   84.28    0.95   3
   0   0 -14   80.97    0.71   3
   2   1 -16    9.15    0.82   3
   2   2 -17   31.35    0.86   3
   3   4 -18    6.50    0.67   3
   4   3 -17    1.90    0.81   3
   5  -1 -12    4.87    0.76   3
   7   0  -5   53.43    0.54   3
   8   2  -8   11.77    0.73   3
   8   2  -7   95.18    0.79   3
   8   5 -10   19.78    0.74   3
   2  -1 -13  242.23    1.05   3
   4  -2 -10  152.62    0.78   3
   5  -2  -8   20.64    0.48   3
   5  -2  -7  302.06    0.88   3
   6  -1 -10   16.95    0.64   3
   6   3 -15   56.86    0.80   3
   8   4 -10   15.66    0.71   3
   2  -2 -10   49.55    0.50   3
   2   4 -18  106.35    0.95   3
   3  -2 -10   24.62    0.58   3
   4   0 -14  202.84    1.16   3
   5   3 -16    6.53    0.68   3
   7   0  -6  140.38    0.74   3
   8   3  -8    4.27    0.73   3
   8   3  -7    6.85    0.65   3
   8   4  -9   20.25    0.75   3
   1   4 -18  163.52    1.06   3
   4  -2  -9   14.61    0.50   3
   4   2 -16    3.97    0.86   3
   5   0 -13   57.62    0.91   3
   6  -1  -9   59.46    0.74   3
   6  -1  -5  155.29    0.62   3
   6   1 -13  363.97    1.40   3
   6   2 -14   20.74    0.87   3
   6   4 -15    1.53    0.75   3
   7   0  -8   37.91    0.72   3
   7   0  -7   65.00    0.72   3
   7   6 -13    7.80    0.67   3
   8   4  -8   32.86    0.78   3
   0   1 -15    3.55    0.68   3
   1  -1 -12   15.74    0.52   3
   1   0 -14   71.10    0.84   3
   4  -1 -12   48.55    0.80   3
   4   1 -15   19.76    0.81   3
   4   4 -17   31.72    0.81   3
   5  -1 -11  162.49    0.95   3
   5   2 -15    4.08    0.86   3
   6  -1  -8   39.06    0.65   3
   6  -1  -6    2.81    0.43   3
   6   5 -15   48.16    0.79   3
   6   6 -15    3.67    0.62   3
   7   5 -13   31.27    0.76   3
   0  -1 -11   46.91    0.47   3
   3  -2  -9    9.73    0.46   3
   4  -2  -8    4.06    0.44   3
   5   1 -14   64.76    0.96   3
   5   4 -16    6.43    0.77   3
   6   0 -11   79.28    0.90   3
   0   2 -16    1.70    0.70   3
   2   0 -14    6.98    0.75   3
   4   5 -17    5.71    0.68   3
   6   3 -14    5.80    0.82   3
   7   7 -12   43.64    0.67   3
   1   3 -17   23.26    0.77   3
   2  -1 -12   16.83    0.56   3
   2   3 -17  122.67    0.99   3
   5  -1 -10   11.49    0.66   3
   5   5 -16   22.54    0.66   3
   5   6 -16   -0.14    0.59   3
   7   1  -9  360.17    1.23   3
   0   0 -13  111.22    0.71   3
   0   5 -18   93.78    0.87   3
   1   1 -15   49.09    0.80   3
   2   1 -15  106.88    0.98   3
   2   2 -16   96.28    0.98   3
   4  -1 -11   77.48    0.77   3
   4   0 -13   14.15    0.80   3
   4   3 -16   25.05    0.84   3
   4   6 -17   15.80    0.62   3
   5   0 -12  316.34    1.24   3
   5   3 -15   50.23    0.90   3
   6   0 -10  411.88    1.29   3
   6   1 -12   11.32    0.73   3
   6   2 -13    2.74    0.87   3
   7   1  -5    1.83    0.43   3
   7   4 -12   99.24    0.95   3
   7   6 -12   21.72    0.71   3
   1   2 -16    7.82    0.77   3
   1   5 -18   36.96    0.75   3
   6   4 -14   30.10    0.86   3
   6   7 -14   11.09    0.63   3
   7   1  -8    0.69    0.67   3
   7   1  -6   85.02    0.65   3
   7   5 -12    3.92    0.74   3
   2   6 -18  137.08    0.89   3
   4   1 -14   28.03    0.87   3
   4   2 -15   17.89    0.88   3
   5  -1  -9  258.93    0.91   3
   5   1 -13   44.30    0.93   3
   6   5 -14  116.25    0.98   3
   7   1  -7   88.51    0.74   3
   7   2 -10  345.90    1.28   3
   7   3 -11    5.67    0.84   3
   7   7 -11   63.55    0.73   3
   3  -1 -11  235.00    0.95   3
   6   0  -9    2.36    0.68   3
   1   0 -13    3.56    0.62   3
   1   6 -18  115.32    0.93   3
   2  -1 -11  269.98    0.94   3
   2   0 -13  125.81    0.91   3
   2   4 -17   15.46    0.83   3
   3   5 -17   55.32    0.88   3
   4  -1 -10  292.02    1.00   3
   4   4 -16    3.34    0.71   3
   5  -1  -8  263.10    0.87   3
   5   0 -11    6.35    0.72   3
   5   4 -15    3.31    0.71   3
   6   1 -11    8.39    0.71   3
   6   3 -13  102.35    1.03   3
   7   2  -9  151.22    0.98   3
   7   4 -11   -0.18    0.79   3
   7   6 -11    0.65    0.66   3
   0   1 -14  194.33    0.96   3
   0   4 -17   25.56    0.85   3
   0   6 -18    3.47    0.72   3
   4   0 -12   39.70    0.79   3
   5  -1  -7  262.13    0.83   3
   6   0  -5    2.84    0.41   3
   6   2 -12  205.54    1.10   3
   7   5 -11   46.76    0.84   3
   1   4 -17   23.65    0.80   3
   3   6 -17   38.43    0.76   3
   4   5 -16   52.60    0.87   3
   5   5 -15   43.07    0.85   3
   5   7 -15   74.58    0.80   3
   6   0  -6  404.12    1.00   3
   6   4 -13    1.85    0.86   3
   7   2  -8  504.23    1.35   3
   7   2  -5   26.21    0.51   3
   7   7 -10    5.78    0.66   3
   0   0 -12   13.87    0.47   3
   1  -1 -10  167.36    0.68   3
   1   7 -18    3.39    0.61   3
   2   3 -16    6.61    0.82   3
   3  -1 -10  121.24    0.72   3
   3   7 -17   47.70    0.72   3
   4  -1  -9    5.87    0.49   3
   4   3 -15    2.71    0.85   3
   5   1 -12   86.62    0.95   3
   5   3 -14    7.13    0.76   3
   5   6 -15    2.97    0.72   3
   6   1 -10  134.64    0.99   3
   6   7 -13   92.85    0.84   3
   7   2  -7    9.50    0.61   3
   7   2  -6  405.51    1.08   3
   7   4 -10  230.62    1.14   3
  -1   7 -18   10.87    0.63   3
   0   2 -15   17.66    0.70   3
   0   3 -16    5.87    0.73   3
   1   1 -14   15.35    0.72   3
   2   1 -14  116.08    0.95   3
   2   5 -17   65.90    0.89   3
   4   1 -13  164.03    1.06   3
   4   2 -14   55.50    0.94   3
   4   6 -16   -0.55    0.71   3
   4   7 -16    2.64    0.63   3
   4   8 -16   27.27    0.56   3
   5   2 -13  228.51    1.20   3
   7   3  -9  509.58    1.42   3
   7   5 -10    1.90    0.76   3
   7   6 -10  134.86    0.91   3
   7   7  -9   75.52    0.82   3
   0   7 -18   15.07    0.65   3
   1   2 -15   48.34    0.85   3
   1   3 -16   54.17    0.90   3
   2   2 -15   12.82    0.72   3
   3   0 -12   77.63    0.80   3
   3   4 -16   16.54    0.91   3
   6   2 -11    5.98    0.82   3
   6   3 -12   10.80    0.78   3
  -1   5 -17  189.16    1.07   3
   1   0 -12  689.89    1.39   3
   4  -1  -8   82.43    0.54   3
   4   0 -11  120.30    0.84   3
   5   4 -14    7.71    0.86   3
   6   8 -12   54.36    0.79   3
   7   3  -5    4.89    0.53   3
   7   4  -9  147.44    1.00   3
   7   6  -9    3.52    0.72   3
   2   0 -12  824.29    1.54   3
   3  -1  -9  160.83    0.71   3
   4   4 -15   54.70    0.93   3
   5   0  -9  286.06    1.01   3
   6   4 -12   15.97    0.90   3
   6   9 -11  136.84    0.82   3
   7   3  -7  227.58    0.98   3
   7   3  -6    6.09    0.54   3
   7   5  -9  220.76    1.06   3
   0   5 -17    2.86    0.72   3
   3   1 -13  637.65    1.57   3
   3   3 -15  114.66    1.06   3
   5   1 -11   78.63    0.78   3
   5   5 -14    7.05    0.82   3
   7   4  -8   34.83    0.75   3
  -1   2 -14  126.64    0.83   3
  -1   4 -16   10.67    0.78   3
   0   1 -13  109.89    0.80   3
   3   2 -14   30.93    0.89   3
   3   5 -16   16.35    0.75   3
   4   1 -12  182.94    1.04   3
   5   2 -12    8.01    0.83   3
   5   3 -13  228.33    1.14   3
   5   6 -14   22.24    0.81   3
   5   7 -14  103.15    0.92   3
   6   2 -10  262.13    1.11   3
   6   3 -11   42.23    0.93   3
   6   7 -12    1.47    0.71   3
   7   4  -7    8.88    0.70   3
   7   5  -8   64.59    0.84   3
   7   6  -8   62.17    0.80   3
   0   0 -11   22.82    0.45   3
   2   8 -17    1.36    0.66   3
   3   0 -11    4.76    0.63   3
   4   3 -14  319.58    1.29   3
   4   5 -15   30.74    0.88   3
   5   0  -8   17.25    0.49   3
   6   1  -7   31.99    0.59   3
   6   1  -5  192.81    0.71   3
   6   6 -12  161.69    1.06   3
   7   4  -6    2.58    0.58   3
  -1   3 -15    2.91    0.64   3
   2   1 -13  458.05    1.30   3
   3   6 -16   27.61    0.86   3
   4   8 -15   14.59    0.67   3
   5   9 -13   61.08    0.79   3
   6   8 -11  134.85    0.97   3
   6   9 -10   15.90    0.67   3
   7   5  -7   10.60    0.66   3
  -1   6 -17   20.35    0.82   3
   0   4 -16    8.68    0.79   3
   2   2 -14   77.73    0.95   3
   3   7 -16    2.53    0.74   3
   3   8 -16    9.45    0.66   3
   4   6 -15   27.37    0.75   3
   4   7 -15    3.21    0.76   3
   5   0  -7   84.89    0.57   3
   5   1 -10   22.76    0.64   3
   5   4 -13    9.39    0.90   3
  -1   1 -12  102.70    0.64   3
   0   2 -14  167.74    0.96   3
   0   3 -15    9.70    0.84   3
   0   6 -17   80.23    0.88   3
   1   0 -11  334.61    0.98   3
   1   3 -15    2.42    0.82   3
   3   4 -15  175.09    1.15   3
   1   7 -17   19.60    0.76   3
   3   1 -12  101.01    0.90   3
   4   0  -9   74.35    0.65   3
   4   4 -14    0.67    0.75   3
   5   2 -11   26.89    0.79   3
   5   3 -12   35.17    0.89   3
   5   5 -13   72.50    0.98   3
   6   2  -8  247.62    1.01   3
   6   5 -11  246.81    1.22   3
   6   6 -11   37.99    0.86   3
   6   7 -11  175.06    1.04   3
   3   0 -10    8.24    0.53   3
   3   3 -14   25.87    0.90   3
   4   1 -11   21.31    0.63   3
   5   1  -9   69.84    0.74   3
   0   7 -17    4.89    0.72   3
   1   5 -16   45.63    0.90   3
   2   6 -16  101.86    1.02   3
   3   5 -15  203.01    1.20   3
   4   2 -12   20.19    0.80   3
   4   3 -13    3.69    0.82   3
   5   6 -13   43.23    0.83   3
   5   7 -13   64.86    0.85   3
   6   2  -7    4.21    0.57   3
   6   2  -4  306.21    0.81   3
   6   3  -9  451.71    1.34   3
   6   4 -10  271.22    1.23   3
   6   8 -10  160.93    0.97   3
  -1   5 -16    4.50    0.80   3
  -1   7 -17    9.49    0.75   3
   4   5 -14  204.39    1.20   3
   4   9 -14   49.60    0.76   3
   5   9 -12  127.88    0.96   3
   0   1 -12   29.10    0.56   3
   0   5 -16   22.15    0.86   3
   0   8 -17   28.28    0.75   3
   2   7 -16   20.45    0.82   3
   4   0  -8   10.78    0.41   3
   5   2 -10   35.01    0.78   3
   5   4 -12   51.21    0.84   3
   6   2  -6   50.45    0.58   3
   6   2  -5  231.33    0.78   3
   6   5 -10  103.54    0.99   3
   6   7 -10   19.48    0.78   3
  -1   2 -13    8.54    0.55   3
   0   9 -17    8.11    0.67   3
   1   0 -10 1079.49    1.51   3
   1   1 -12    3.70    0.59   3
   2   8 -16  137.38    0.99   3
   2   9 -16   19.78    0.66   3
   3   6 -15   23.27    0.88   3
   3   9 -15   27.49    0.72   3
   4   1 -10  150.65    0.87   3
   4   6 -14   22.17    0.77   3
   4   7 -14  120.99    1.01   3
   4   8 -14    2.70    0.73   3
   5   1  -8    4.58    0.48   3
   5   3 -11   50.51    0.86   3
   5  10 -11  105.79    0.80   3
   6   3  -8  264.53    1.06   3
   6   6 -10  233.19    1.17   3
   3   0  -9   33.14    0.47   3
  -7  -6   3   74.93    0.98   4
  -7  -4   3   43.59    0.70   4
  -6 -11   7    5.26    0.66   4
  -5  -8  -1    8.11    0.75   4
  -4 -13   2  128.83    1.00   4
   0 -12  -4   58.27    0.95   4
  -7  -8   5    9.58    0.79   4
  -6 -11   6   -0.65    0.68   4
  -6  -6   0   18.21    0.83   4
  -5 -12   3    2.49    0.80   4
  -1 -11  -4   30.06    0.87   4
   0 -16   0    8.79    0.65   4
   1 -16  -1   38.18    0.76   4
  -7  -3   3    1.95    0.51   4
  -6  -4   0  758.08    1.45   4
  -6  -2   1  117.56    0.60   4
  -5 -10   0   12.82    0.93   4
  -4 -11  -1   23.52    0.97   4
  -3 -14   1   96.20    0.93   4
  -3 -10  -3  113.01    1.09   4
  -1  -7  -5    4.52    0.49   4
  -7  -8   4    5.21    0.82   4
  -7  -7   3   44.73    0.91   4
  -6 -11   5   27.01    0.74   4
  -6  -7   0  133.46    1.07   4
  -5  -9  -1  205.81    1.22   4
  -5  -6  -2   53.71    0.79   4
  -4 -12   0   44.12    0.84   4
  -4  -5  -3  979.73    1.54   4
  -3  -7  -4  537.92    1.36   4
  -3  -6  -4  520.59    1.22   4
  -2 -10  -4   15.82    0.87   4
   1 -13  -4    5.04    0.76   4
   1 -11  -5   38.46    0.76   4
  -7  -9   6   13.77    0.81   4
  -7  -9   7    8.44    0.69   4
  -7  -6   2    2.01    0.90   4
  -7  -5   2    6.14    0.75   4
  -7  -4   2   57.88    0.73   4
  -6  -9   1  182.52    1.21   4
  -6  -3   0   35.15    0.55   4
  -5  -5  -2   25.10    0.59   4
  -4 -10  -2   38.42    0.97   4
  -4  -8  -3  174.07    1.08   4
  -2 -12  -3  180.46    1.19   4
  -1 -13  -3   41.48    0.92   4
  -1  -9  -5   11.86    0.71   4
  -6 -11   4    5.96    0.75   4
  -6 -10   2    7.23    0.92   4
  -5 -12   2   14.29    0.80   4
  -5  -4  -2   10.39    0.54   4
  -4 -13   1   22.06    0.81   4
  -4  -4  -3    1.32    0.46   4
  -3 -13  -1   16.64    0.87   4
  -3 -12  -2  131.58    1.16   4
  -3  -8  -4  443.38    1.30   4
  -3  -5  -4 1481.77    1.79   4
  -1 -15  -1    3.70    0.72   4
   0 -14  -3    3.87    0.78   4
  -7  -8   3   32.97    0.88   4
  -7  -3   2    7.49    0.61   4
  -7  -2   3  112.62    0.65   4
  -6  -8   0  190.88    1.17   4
  -1 -12  -4   24.17    0.92   4
   0 -11  -5   15.93    0.75   4
  -7  -7   2   50.32    0.92   4
  -5  -8  -2   65.97    0.96   4
  -4  -9  -3  199.06    1.18   4
  -3 -11  -3  113.74    1.12   4
  -3  -9  -4   44.24    0.95   4
  -2 -11  -4   86.64    1.02   4
  -1 -10  -5  122.54    0.97   4
  -7  -9   4    3.42    0.79   4
  -6  -6  -1   93.58    0.86   4
  -6  -5  -1    5.11    0.63   4
  -5 -11   0   67.73    0.97   4
  -5 -10  -1   67.73    1.02   4
  -3 -14   0    3.24    0.75   4
  -2  -8  -5   59.70    0.79   4
   0 -16  -1    0.94    0.61   4
  -7  -6   1  492.30    1.46   4
  -7  -5   1    4.40    0.65   4
  -7  -4   1   71.39    0.78   4
  -6  -7  -1   64.47    0.96   4
  -5 -12   1   13.18    0.78   4
  -5  -3  -2  291.30    0.87   4
  -4 -14   2    2.02    0.60   4
  -4 -12  -1    0.81    0.73   4
  -4 -11  -2   20.35    0.93   4
  -7  -8   2   17.73    0.91   4
  -6 -10   1    4.85    0.78   4
  -6  -9   0    1.97    0.77   4
  -5  -9  -2   17.33    0.95   4
  -4 -13   0   57.00    0.86   4
  -2  -9  -5   59.39    0.87   4
  -7 -10   6    8.06    0.65   4
  -7  -9   3   89.06    0.95   4
  -7  -7   1   11.33    0.93   4
  -7  -2   2   21.42    0.49   4
  -6 -11   2   24.89    0.84   4
  -5  -6  -3    2.56    0.71   4
  -4 -10  -3    5.75    0.94   4
  -4  -7  -4  160.19    0.99   4
  -4  -6  -4   68.04    0.77   4
  -2 -14  -2    7.84    0.76   4
  -2 -13  -3    0.77    0.86   4
  -1 -14  -3  136.26    1.03   4
  -1 -11  -5   27.88    0.86   4
   0 -12  -5    6.27    0.82   4
  -8  -6   5    4.76    0.79   4
  -7 -10   5   34.68    0.71   4
  -7  -3   1   69.36    0.69   4
  -6  -8  -1    2.53    0.77   4
  -5  -7  -3    8.25    0.81   4
  -5  -5  -3  104.56    0.81   4
  -4  -5  -4    1.20    0.53   4
  -1 -15  -2  143.08    0.98   4
   0  -8  -6  139.64    0.76   4
  -8  -5   4   13.19    0.70   4
  -8  -4   4   13.62    0.71   4
  -5 -13   2    0.89    0.60   4
  -4  -8  -4   55.30    0.90   4
  -3  -7  -5   83.80    0.83   4
  -2 -12  -4    2.75    0.86   4
  -2 -10  -5  125.81    1.04   4
  -1 -13  -4   35.14    0.87   4
   0  -9  -6  317.54    1.06   4
  -8  -6   4   10.07    0.74   4
  -7 -10   4    2.70    0.70   4
  -7  -9   2   17.00    0.83   4
  -7  -5   0   58.32    0.86   4
  -6  -6  -2    5.32    0.78   4
  -5 -12   0   24.10    0.79   4
  -5 -10  -2   14.53    0.91   4
  -5  -4  -3   40.95    0.64   4
  -4 -14   1    0.47    0.55   4
  -3 -14  -1    1.88    0.73   4
  -3  -8  -5   96.11    0.97   4
  -3  -6  -5   89.92    0.74   4
  -2 -15  -1   36.57    0.71   4
   0 -15  -3   30.14    0.76   4
   0  -7  -6   14.67    0.44   4
  -8  -7   5    4.83    0.71   4
  -7  -4   0   38.29    0.74   4
  -6  -9  -1    3.95    0.92   4
  -6  -5  -2  162.96    0.91   4
  -4 -12  -2   14.37    0.87   4
  -4  -9  -4   25.67    0.90   4
  -4  -4  -4   23.68    0.51   4
  -1  -8  -6   16.19    0.63   4
  -1  -7  -6  239.14    0.88   4
   0 -14  -4    5.01    0.75   4
  -8  -7   4   19.35    0.79   4
  -8  -6   3    2.59    0.82   4
  -8  -4   3  171.86    0.96   4
  -7 -10   3   29.35    0.82   4
  -7  -2   1   68.44    0.59   4
  -6 -11   1    3.59    0.67   4
  -6  -7  -2    4.27    0.74   4
  -6  -4  -2   99.97    0.82   4
  -4 -11  -3  120.24    1.09   4
  -3  -5  -5  640.65    1.26   4
  -1 -12  -5    4.29    0.80   4
  -1  -9  -6  154.34    0.92   4
  -7  -3   0   13.76    0.61   4
  -6  -2  -1  136.39    0.66   4
  -5  -9  -3    5.01    0.92   4
  -8  -3   3    2.28    0.63   4
  -7  -1   2  171.76    0.66   4
  -6  -8  -2   40.70    0.94   4
  -5 -13   1   24.39    0.58   4
  -5  -3  -3   89.06    0.65   4
  -1  -6  -6   38.48    0.50   4
   0 -13  -5   11.39    0.74   4
   0 -11  -6   22.56    0.80   4
  -8  -5   2   30.29    0.80   4
  -8  -4   2  180.85    1.02   4
  -6 -12   2    2.22    0.61   4
  -4 -14   0    4.96    0.59   4
  -4 -10  -4   60.36    1.00   4
  -2 -14  -3  318.81    1.21   4
  -2  -8  -6   15.98    0.71   4
  -2  -7  -6  155.76    0.85   4
  -8  -8   4    2.04    0.78   4
  -8  -6   2  226.09    1.15   4
  -7 -10   2    4.01    0.73   4
  -6 -11   0    2.75    0.76   4
  -5 -11  -2   39.37    0.81   4
  -5  -7  -4    8.06    0.83   4
  -5  -6  -4    8.47    0.65   4
  -4  -3  -4  138.24    0.64   4
  -3  -4  -5  203.31    0.75   4
  -2 -13  -4  181.46    1.09   4
  -2  -9  -6   12.68    0.78   4
  -1 -14  -4   92.58    0.96   4
  -7  -7  -1   11.69    0.91   4
  -7  -4  -1  106.52    0.88   4
  -6  -9  -2   13.40    0.92   4
  -5 -10  -3   28.10    0.95   4
  -5  -5  -4  100.99    0.77   4
  -4  -7  -5  486.17    1.36   4
  -4  -6  -5  113.89    0.81   4
  -2 -15  -2   65.73    0.74   4
  -2  -6  -6  380.52    1.01   4
  -1 -15  -3   17.55    0.69   4
  -8  -8   3   11.88    0.77   4
  -8  -7   2    4.18    0.80   4
  -8  -3   2   12.49    0.63   4
  -7  -2   0  163.12    0.77   4
  -6  -7  -3   16.14    0.86   4
  -6  -5  -3  327.88    1.19   4
  -5 -13   0    0.11    0.58   4
  -5  -8  -4    4.32    0.75   4
  -4 -13  -2   26.45    0.76   4
  -4 -12  -3    0.44    0.84   4
  -4  -8  -5  177.84    1.04   4
  -4  -5  -5  867.18    1.57   4
  -2 -12  -5  189.30    1.16   4
  -1 -13  -5   19.37    0.85   4
  -1 -11  -6   47.60    0.85   4
  -8  -5   1   81.28    0.94   4
  -7  -9   0  181.61    1.14   4
  -7  -3  -1   26.66    0.66   4
  -7  -1   1  173.61    0.69   4
  -6 -12   1   21.79    0.67   4
  -5  -4  -4   29.63    0.62   4
  -2 -10  -6  140.87    1.07   4
   0 -12  -6    7.10    0.73   4
  -8  -9   5   -0.02    0.58   4
  -8  -6   1   29.23    0.85   4
  -8  -4   1   15.85    0.71   4
  -7  -8  -1   21.48    0.95   4
  -6  -8  -3   49.21    0.96   4
  -6  -4  -3  130.74    0.81   4
  -4 -11  -4   29.43    0.93   4
  -4  -9  -5   10.41    0.92   4
  -2  -5  -6   92.38    0.61   4
  -8  -9   4    3.20    0.65   4
  -8  -8   2  113.36    0.93   4
  -6 -11  -1    3.41    0.73   4
  -5  -9  -4    2.75    0.77   4
  -8  -7   1  150.84    1.05   4
  -8  -3   1   13.91    0.67   4
  -8  -2   2  296.10    0.97   4
  -7  -6  -2   18.15    0.89   4
  -7  -5  -2  121.56    0.94   4
  -6 -10  -2    9.09    0.73   4
  -5 -12  -2   42.19    0.82   4
  -5 -11  -3    3.70    0.83   4
  -4  -4  -5    8.53    0.47   4
  -3  -9  -6  153.45    1.10   4
   0  -9  -7  744.51    1.49   4
  -8  -9   3   10.75    0.66   4
  -8  -5   0   17.46    0.82   4
  -7  -7  -2    5.12    0.88   4
  -6 -12   0    6.74    0.59   4
  -6  -3  -3    1.90    0.58   4
  -5  -3  -4  412.81    1.06   4
  -4 -10  -5    1.69    0.91   4
  -3 -13  -4  156.24    1.05   4
  -3  -5  -6 1346.22    1.82   4
  -2 -14  -4   10.26    0.77   4
  -2 -11  -6    8.33    0.83   4
  -1 -12  -6    2.52    0.75   4
  -1  -8  -7   14.77    0.63   4
   0  -8  -7    3.53    0.48   4
  -8  -6   0  125.43    1.01   4
  -8  -4   0  237.97    1.12   4
  -7 -10   0    9.64    0.75   4
  -7  -9  -1   11.47    0.84   4
  -7  -2  -1  118.81    0.74   4
  -6  -9  -3   63.19    0.88   4
  -5 -13  -1    4.80    0.58   4
  -5 -10  -4    3.68    0.89   4
  -5  -7  -5   38.10    0.89   4
  -5  -6  -5  149.00    1.02   4
  -3 -14  -3   46.10    0.73   4
  -1  -7  -7    0.50    0.56   4
  -8  -8   1  128.03    0.98   4
  -7  -1   0  112.46    0.62   4
  -6  -6  -4   32.43    0.76   4
  -5  -5  -5   40.67    0.77   4
  -4 -13  -3   44.72    0.80   4
  -3 -12  -5  156.32    1.06   4
  -3 -10  -6   34.69    0.93   4
  -2 -13  -5   10.52    0.75   4
   0  -7  -7  150.36    0.66   4
  -8  -9   2    3.82    0.68   4
  -8  -7   0   85.58    0.95   4
  -8  -2   1   42.63    0.62   4
  -6  -7  -4   32.92    0.81   4
  -5  -8  -5    1.47    0.76   4
  -4  -7  -6  386.63    1.28   4
  -4  -6  -6  131.44    0.96   4
  -2  -8  -7  144.48    0.98   4
  -2  -7  -7  115.45    0.84   4
  -1 -15  -4    4.97    0.57   4
  -1 -14  -5    4.18    0.71   4
  -1 -10  -7   76.49    0.88   4
  -6 -11  -2    5.35    0.74   4
  -6  -8  -4   68.62    0.99   4
  -6  -4  -4  103.09    0.84   4
  -4  -8  -6   15.20    0.79   4
  -4  -3  -5 2024.35    2.03   4
  -2  -9  -7  247.02    1.18   4
   0 -11  -7   86.66    0.85   4
  -9  -5   3    5.90    0.76   4
  -8  -5  -1   29.84    0.85   4
  -7  -6  -3    7.56    0.86   4
  -7  -5  -3  102.25    1.02   4
  -6 -10  -3    0.64    0.78   4
  -6  -2  -3    3.68    0.54   4
  -6  -1  -2  106.11    0.58   4
  -5 -12  -3    1.20    0.69   4
  -5  -4  -5   54.75    0.65   4
  -4  -5  -6   45.74    0.72   4
  -3  -4  -6  555.80    1.14   4
  -2 -12  -6    0.81    0.78   4
  -8  -9   1   28.35    0.74   4
  -8  -8   0   76.93    0.89   4
  -8  -6  -1  202.62    1.16   4
  -8  -4  -1   37.90    0.84   4
  -7 -10  -1   88.70    0.81   4
  -7  -9  -2   21.38    0.86   4
  -7  -7  -3   59.73    0.98   4
  -5 -11  -4   20.89    0.83   4
  -5  -2  -4  435.18    1.01   4
  -4  -9  -6   76.21    0.94   4
  -3 -11  -6  262.62    1.24   4
  -2 -10  -7    8.15    0.92   4
  -1 -13  -6   15.06    0.75   4
  -1 -11  -7    1.12    0.73   4
  -9  -6   3   14.37    0.70   4
  -7 -11   0   71.45    0.73   4
  -7  -4  -3   72.20    0.81   4
  -7  -2  -2   33.51    0.62   4
  -6  -9  -4   16.98    0.87   4
  -5 -13  -2   11.09    0.57   4
  -3  -8  -7   39.61    0.85   4
  -9  -5   2    2.46    0.69   4
  -9  -4   2  118.32    0.90   4
  -8  -3  -1   46.62    0.79   4
  -8  -2   0  173.40    0.85   4
  -7  -8  -3    5.19    0.85   4
  -7  -1  -1  310.77    0.90   4
  -6  -3  -4    5.45    0.54   4
  -9  -6   2   52.99    0.79   4
  -6  -6  -5  128.07    1.03   4
  -5 -10  -5    4.43    0.84   4
  -5  -3  -5   51.19    0.62   4
  -4  -4  -6  272.78    0.93   4
  -3 -14  -4   92.62    0.77   4
  -3 -13  -5    9.73    0.74   4
  -3  -9  -7   72.44    0.96   4
  -2 -14  -5  164.23    0.95   4
  -2  -5  -7   70.32    0.62   4
  -8  -9   0   43.12    0.78   4
  -8  -1   1  152.27    0.72   4
  -6  -7  -5    9.63    0.87   4
  -6  -5  -5   60.40    0.90   4
  -5  -7  -6    5.09    0.74   4
  -5  -6  -6  116.08    0.90   4
  -2 -11  -7    2.06    0.81   4
  -9  -7   2    3.60    0.74   4
  -9  -5   1   86.27    0.89   4
  -8  -4  -2  233.66    1.13   4
  -7 -10  -2    4.76    0.68   4
  -7   0   0    1.11    0.40   4
  -6 -12  -2   20.11    0.61   4
  -6 -10  -4   51.39    0.87   4
  -5  -8  -6   10.07    0.88   4
  -5  -5  -6  123.91    0.93   4
  -3 -12  -6   63.16    0.89   4
  -3 -10  -7   48.87    0.92   4
  -3  -3  -6  781.94    1.28   4
  -2 -13  -6   53.18    0.88   4
  -1 -12  -7   83.15    0.88   4
  -9  -6   1   13.01    0.73   4
  -8  -2  -1  391.46    1.15   4
  -7 -11  -1    0.87    0.59   4
  -7  -9  -3    9.16    0.80   4
  -7  -6  -4    1.71    0.74   4
  -7  -5  -4   68.03    0.93   4
  -6  -8  -5    7.56    0.77   4
  -6  -4  -5  250.93    1.11   4
  -5 -12  -4   22.41    0.72   4
  -4  -7  -7    7.61    0.86   4
  -9  -3   1  238.15    1.07   4
  -7  -7  -4    4.72    0.75   4
  -7  -4  -4  172.37    1.06   4
  -6  -2  -4    1.98    0.55   4
  -5  -9  -6    8.24    0.86   4
  -4  -6  -7  164.78    1.03   4
  -1  -9  -8   39.49    0.83   4
   0  -9  -8  110.36    0.81   4
  -9  -7   1   35.62    0.74   4
  -9  -5   0    6.42    0.86   4
  -8  -3  -2  129.57    0.94   4
  -8  -1   0   50.11    0.60   4
  -7  -1  -2  174.52    0.79   4
  -6  -9  -5   53.05    0.94   4
  -5 -11  -5    3.36    0.76   4
  -5  -4  -6  415.26    1.19   4
  -4  -3  -6    5.98    0.45   4
  -2  -8  -8    4.26    0.82   4
  -9  -8   2   25.29    0.61   4
  -9  -6   0  146.49    0.98   4
  -9  -4   0  267.23    1.14   4
  -7  -8  -4   22.84    0.88   4
  -5  -2  -5   47.48    0.60   4
  -5  -1  -4  271.57    0.78   4
  -4  -5  -7  613.61    1.46   4
  -3 -11  -7    9.41    0.82   4
  -2 -12  -7  171.06    1.01   4
  -2  -9  -8   69.37    0.89   4
  -2  -7  -8    6.25    0.69   4
  -2  -4  -7   46.46    0.52   4
  -1 -10  -8    7.80    0.75   4
  -1  -7  -8    6.71    0.55   4
  -8  -6  -3   28.90    0.93   4
  -7  -3  -4  229.97    1.09   4
  -6  -3  -5  179.97    0.88   4
  -9  -7   0    0.62    0.76   4
  -9  -3   0  232.22    1.05   4
  -9  -2   1    1.11    0.65   4
  -7 -10  -3   40.16    0.69   4
  -7   0  -1    8.65    0.40   4
  -6 -11  -4   42.35    0.74   4
  -6  -6  -6   19.12    0.89   4
  -5 -10  -6    3.73    0.84   4
  -2 -10  -8    3.87    0.85   4
  -2  -6  -8  188.04    0.91   4
   0  -7  -8   45.80    0.50   4
  -9  -8   1    9.21    0.61   4
  -8  -7  -3    3.58    0.84   4
  -8  -2  -2  141.16    0.91   4
  -8  -1  -1   33.48    0.66   4
  -7  -9  -4   10.89    0.81   4
  -6 -10  -5   40.18    0.83   4
  -6  -5  -6   76.65    0.93   4
  -5  -7  -7   52.25    0.94   4
  -5  -3  -6  484.74    1.24   4
  -4 -13  -5   34.39    0.66   4
  -4 -10  -7   79.03    0.99   4
  -3 -13  -6  141.54    0.91   4
  -3  -8  -8   50.53    0.89   4
  -3  -7  -8    4.89    0.77   4
  -1 -11  -8   21.80    0.79   4
  -1  -6  -8  137.43    0.71   4
  -9  -6  -1    0.35    0.75   4
  -9  -5  -1  134.07    1.00   4
  -8  -9  -2   49.92    0.80   4
  -8  -3  -3   20.56    0.81   4
  -7  -7  -5   59.37    0.96   4
  -7  -6  -5    9.17    0.76   4
  -6  -8  -6   40.88    0.96   4
  -5  -8  -7    1.56    0.91   4
  -4 -12  -6   18.83    0.73   4
  -4  -4  -7  492.20    1.24   4
  -3  -9  -8  262.12    1.27   4
  -3  -6  -8   12.30    0.73   4
  -7  -4  -5  192.40    1.10   4
  -7  -1  -3   17.93    0.57   4
  -6  -4  -6   47.25    0.85   4
  -6  -1  -4   23.35    0.55   4
  -5 -12  -5   21.87    0.69   4
  -5  -5  -7   60.96    0.87   4
  -9  -7  -1  164.75    1.05   4
  -9  -3  -1   84.28    0.88   4
  -9  -2   0   74.30    0.78   4
  -8  -8  -3   33.92    0.73   4
  -7  -2  -4  188.42    0.91   4
  -6  -2  -5  425.30    1.13   4
  -4  -2  -6  136.71    0.69   4
  -2 -11  -8  124.14    0.97   4
  -2  -5  -8   86.93    0.69   4
   0  -6  -8  552.53    1.04   4
  -8  -6  -4    4.75    0.88   4
  -8  -5  -4   12.31    0.94   4
  -8   0   0  184.94    0.76   4
  -7  -8  -5    4.96    0.72   4
  -6  -9  -6   45.33    0.91   4
  -6   0  -3  197.25    0.71   4
  -5  -9  -7    5.16    0.89   4
  -4 -11  -7  103.11    0.95   4
  -3 -10  -8  105.45    1.00   4
  -3  -5  -8  103.50    0.84   4
  -3  -3  -7 1131.45    1.58   4
  -9  -5  -2   32.08    0.85   4
  -8  -4  -4   58.60    1.01   4
  -8  -2  -3   16.19    0.74   4
  -7 -10  -4   11.68    0.67   4
  -7  -3  -5  212.21    1.12   4
  -7   0  -2   89.31    0.60   4
  -5  -4  -7   84.74    0.78   4
  -5  -1  -5  200.92    0.77   4
  -1  -5  -8   44.64    0.50   4
  -9  -6  -2  286.63    1.20   4
  -9  -4  -2   80.55    0.94   4
  -8  -9  -3    4.55    0.67   4
  -8  -7  -4   18.79    0.84   4
  -8  -1  -2  933.12    1.60   4
  -6 -11  -5   23.68    0.68   4
  -6  -3  -6  182.53    0.93   4
  -5  -2  -6  765.38    1.42   4
  -4  -9  -8   66.58    1.01   4
  -4  -3  -7  488.69    1.18   4
  -9  -8  -1    0.43    0.66   4
  -9  -2  -1    1.17    0.69   4
  -7  -9  -5   65.52    0.84   4
  -6  -6  -7   77.72    1.02   4
  -4  -5  -8   35.96    0.81   4
  -3 -11  -8  145.00    1.03   4
  -9  -3  -2  125.13    0.98   4
  -9  -1   0    1.61    0.62   4
  -8  -8  -4    4.75    0.75   4
  -7  -6  -6   35.91    0.83   4
  -7  -5  -6   58.85    0.98   4
  -6 -10  -6    0.98    0.75   4
  -6  -7  -7   65.16    0.89   4
  -6  -5  -7    1.53    0.85   4
  -2 -12  -8   46.64    0.77   4
  -1  -9  -9   39.72    0.76   4
  -1  -8  -9  859.69    1.62   4
 -10  -5   1  110.54    0.87   4
  -8   0  -1    6.63    0.49   4
  -7  -7  -6   12.08    0.76   4
  -6  -8  -7   45.46    0.95   4
  -5  -7  -8   10.88    0.91   4
  -5  -6  -8   13.64    0.88   4
  -5  -3  -7   51.60    0.73   4
  -4 -10  -8   43.91    0.87   4
  -2  -9  -9   26.01    0.84   4
  -2  -7  -9   51.42    0.80   4
  -2  -4  -8  472.34    1.08   4
  -1 -10  -9  385.00    1.31   4
  -1  -7  -9  102.81    0.79   4
  -9  -5  -3   73.43    0.96   4
  -8  -5  -5   11.35    0.85   4
  -7  -2  -5   98.64    0.81   4
  -6  -4  -7    5.52    0.78   4
  -6  -1  -5  224.48    0.85   4
  -5  -8  -8   94.53    1.06   4
  -4 -12  -7    6.62    0.68   4
  -3 -13  -7   27.14    0.63   4
  -3  -8  -9   62.75    0.93   4
  -3  -7  -9  159.89    1.07   4
 -10  -6   1    7.37    0.63   4
  -9  -8  -2   84.55    0.77   4
  -9  -6  -3   49.42    0.85   4
  -9  -4  -3   22.44    0.84   4
  -9  -2  -2  135.00    0.96   4
  -8  -6  -5    2.02    0.72   4
  -8  -4  -5  163.08    1.13   4
  -8  -1  -3   38.56    0.72   4
  -7 -10  -5   46.82    0.70   4
  -7  -8  -6   71.54    0.83   4
  -7   0  -3  398.06    1.02   4
  -6  -2  -6   77.00    0.70   4
  -5  -5  -8    7.49    0.81   4
  -3  -9  -9  133.00    1.11   4
  -2  -6  -9    5.65    0.64   4
 -10  -5   0    4.47    0.72   4
 -10  -4   0   26.35    0.78   4
  -9  -1  -1  409.04    1.18   4
  -8  -9  -4   18.59    0.66   4
  -8  -7  -5   12.13    0.83   4
  -7  -3  -6    4.82    0.77   4
  -6  -9  -7    7.67    0.83   4
  -3  -6  -9   32.94    0.81   4
 -10  -6   0    2.40    0.65   4
  -9  -3  -3   79.91    0.91   4
  -8   0  -2    4.88    0.53   4
  -6 -11  -6  157.54    0.90   4
  -4  -2  -7    8.79    0.52   4
  -4  -1  -6  143.79    0.63   4
  -3 -12  -8    2.62    0.68   4
  -3  -2  -7  285.12    0.83   4
  -1  -6  -9  260.65    0.89   4
 -10  -3   0    3.93    0.71   4
  -8  -3  -5   80.66    0.98   4
  -7  -9  -6   40.83    0.79   4
  -6  -3  -7   57.42    0.75   4
  -5  -4  -8  176.51    0.97   4
  -5  -1  -6  285.66    0.92   4
  -4  -8  -9    2.26    0.85   4
  -4  -7  -9  164.18    1.13   4
  -3 -10  -9    1.27    0.78   4
  -2 -11  -9   38.24    0.86   4
 -10  -5  -1   70.65    0.88   4
 -10  -4  -1    5.43    0.75   4
  -8  -8  -5    5.89    0.61   4
  -7  -6  -7    6.45    0.89   4
  -7  -5  -7   35.71    0.92   4
  -5  -2  -7   27.46    0.64   4
  -3  -5  -9  114.11    0.89   4
  -2  -5  -9   37.20    0.64   4
  -9  -4  -4    9.85    0.86   4
  -9  -2  -3   55.29    0.85   4
  -9  -1  -2  211.68    0.98   4
  -7  -7  -7  116.76    1.04   4
  -7  -1  -5   98.49    0.75   4
  -7   1  -2   11.54    0.40   4
  -6 -10  -7  107.40    0.89   4
  -6  -7  -8   99.32    1.02   4
  -6  -6  -8    6.19    0.77   4
  -6  -5  -8  167.90    1.12   4
  -5 -10  -8   24.89    0.80   4
  -4  -9  -9  297.33    1.28   4
  -4  -3  -8  160.00    0.84   4
 -10  -6  -1   26.09    0.66   4
 -10  -3  -1  197.86    1.01   4
  -8  -6  -6   76.45    0.98   4
  -8  -5  -6    2.16    0.87   4
  -8  -1  -4    3.73    0.61   4
  -7  -4  -7   78.71    0.97   4
  -7  -2  -6  809.19    1.64   4
  -7   0  -4   29.90    0.59   4
  -6  -8  -8   47.88    0.93   4
  -6  -1  -6   42.89    0.66   4
  -2  -3  -8   29.96    0.47   4
  -9  -3  -4   30.14    0.87   4
  -8  -4  -6   46.02    0.95   4
  -8   0  -3    9.27    0.59   4
  -7  -8  -7  142.05    1.03   4
  -5  -3  -8    3.55    0.70   4
  -3 -11  -9    7.47    0.74   4
  -1  -5  -9    4.44    0.48   4
 -10  -5  -2    5.57    0.68   4
 -10  -4  -2   44.91    0.78   4
  -9   0  -1    0.44    0.60   4
  -8  -9  -5    4.28    0.51   4
  -8  -7  -6   64.76    0.80   4
  -8   1  -1   51.23    0.54   4
  -7 -10  -6   26.06    0.56   4
  -6  -4  -8    5.31    0.71   4
  -6  -2  -7  277.15    1.05   4
  -6   0  -5  516.58    1.12   4
  -4 -10  -9   -0.17    0.76   4
 -10  -6  -2   23.10    0.73   4
 -10  -2  -1   11.54    0.73   4
  -8  -3  -6   97.15    0.99   4
  -7  -3  -7  123.87    0.93   4
  -6  -9  -8   76.04    0.89   4
  -5  -5  -9   44.34    0.96   4
  -3  -4  -9    4.23    0.55   4
  -2  -9 -10   37.85    0.87   4
  -2  -8 -10  187.05    1.07   4
 -10  -3  -2    9.94    0.73   4
  -9  -2  -4  187.32    1.10   4
  -9  -1  -3  255.35    1.10   4
  -8  -8  -6   42.21    0.76   4
  -7  -9  -7   46.21    0.74   4
  -7   1  -3   24.57    0.48   4
  -5 -11  -8   69.02    0.76   4
  -3  -8 -10   54.01    0.92   4
  -2  -7 -10   89.07    0.87   4
  -2  -4  -9  185.12    0.81   4
  -1  -8 -10   12.78    0.64   4
  -9  -6  -5   33.09    0.83   4
  -7  -1  -6   24.73    0.74   4
  -6  -3  -8   22.15    0.82   4
  -5  -9  -9   15.81    0.79   4
  -4  -2  -8   73.29    0.70   4
  -4  -1  -7  321.59    0.90   4
  -3  -9 -10   36.52    0.91   4
  -1  -7 -10  179.73    0.91   4
 -10  -5  -3   83.49    0.90   4
 -10  -4  -3    1.24    0.79   4
  -9   0  -2  353.86    1.10   4
  -8   1  -2  491.87    1.12   4
  -7  -6  -8  200.68    1.17   4
  -7  -5  -8    7.10    0.90   4
  -5  -4  -9    6.13    0.83   4
  -5  -1  -7  142.13    0.75   4
  -3  -6 -10  146.08    1.03   4
  -2 -10 -10   12.46    0.76   4
  -2  -6 -10  333.85    1.13   4
 -10  -2  -2   53.88    0.79   4
  -9  -7  -5    3.50    0.66   4
  -8  -6  -7   30.69    0.87   4
  -8  -5  -7   76.82    0.98   4
  -8  -2  -6  200.84    1.14   4
  -8   0  -4   39.26    0.70   4
  -7  -7  -8  114.02    0.99   4
  -7  -2  -7   36.03    0.83   4
  -6  -7  -9    4.42    0.87   4
  -6  -6  -9  108.45    1.06   4
  -5  -2  -8  135.48    0.82   4
  -5   0  -6  543.05    1.11   4
  -4 -11  -9    4.60    0.64   4
  -4  -8 -10    8.75    0.84   4
  -4  -7 -10    6.16    0.84   4
  -3 -12  -9   24.49    0.67   4
 -10  -6  -3    1.13    0.63   4
 -10  -3  -3  188.41    1.05   4
 -10  -1  -1  343.92    1.17   4
  -8  -4  -7    0.37    0.85   4
  -7  -4  -8  235.54    1.16   4
  -6  -5  -9   26.13    0.91   4
  -6  -1  -7   24.83    0.70   4
  -5 -10  -9    3.84    0.74   4
  -4  -6 -10   29.07    0.79   4
  -4  -3  -9  154.52    0.95   4
   0  -5  -9   26.07    0.46   4
  -9  -2  -5    0.56    0.84   4
  -9  -1  -4    8.90    0.77   4
  -8  -7  -7   45.55    0.80   4
  -7  -8  -8   20.23    0.75   4
  -6  -8  -9  168.47    1.10   4
  -6   0  -6   59.91    0.67   4
  -3  -5 -10   16.05    0.77   4
  -3  -3  -9  286.70    0.96   4
  -1  -6 -10  105.17    0.71   4
  -1  -4  -9 1066.96    1.43   4
  -9  -5  -6   -0.61    0.78   4
  -9   0  -3   11.83    0.67   4
  -8  -3  -7   13.79    0.90   4
  -7  -3  -8    4.65    0.84   4
  -7   1  -4    8.32    0.49   4
  -6  -4  -9  139.53    1.08   4
  -6  -2  -8   70.36    0.78   4
  -5  -3  -9   38.80    0.85   4
  -4  -5 -10   -0.08    0.83   4
  -2  -5 -10  126.11    0.82   4
 -10  -5  -4   36.55    0.74   4
 -10  -4  -4   78.07    0.89   4
 -10  -2  -3    4.10    0.75   4
 -10  -1  -2    7.89    0.68   4
  -9  -6  -6   18.54    0.76   4
  -9  -4  -6   23.54    0.88   4
  -8  -8  -7   29.25    0.68   4
  -8   1  -3   14.96    0.55   4
 -10  -3  -4    1.90    0.85   4
  -9   1  -1  204.27    0.84   4
  -8  -1  -6   43.67    0.79   4
  -8   0  -5  185.80    0.98   4
  -7  -9  -8   71.12    0.76   4
  -7  -1  -7   82.67    0.87   4
  -5  -8 -10    9.69    0.83   4
  -4 -10 -10  123.43    0.95   4
  -3 -11 -10   27.29    0.73   4
  -2  -3  -9   44.49    0.53   4
 -10  -6  -4   28.02    0.68   4
  -9  -7  -6   23.38    0.66   4
  -8  -2  -7  171.70    1.10   4
  -7   0  -6  500.77    1.26   4
  -6  -3  -9    2.19    0.82   4
  -6   1  -5   20.58    0.45   4
  -3  -4 -10  109.15    0.86   4
  -9  -1  -5  385.43    1.33   4
  -8  -5  -8   -0.10    0.83   4
  -7  -6  -9  123.00    1.05   4
  -7  -5  -9   86.24    1.03   4
  -7  -2  -8  207.20    1.14   4
  -5  -1  -8    5.39    0.53   4
  -4  -1  -8   83.93    0.67   4
  -1  -5 -10    8.93    0.53   4
 -10  -2  -4   29.67    0.85   4
 -10  -1  -3   89.98    0.89   4
  -9   0  -4    6.74    0.74   4
  -9   1  -2  529.44    1.22   4
  -8  -6  -8  201.45    1.03   4
  -8  -4  -8   68.76    1.00   4
  -8   1  -4   52.35    0.68   4
  -7  -7  -9   67.23    0.89   4
  -5  -9 -10    7.32    0.72   4
  -5  -4 -10    1.80    0.90   4
  -5  -2  -9  203.55    1.06   4
  -5   0  -7   15.93    0.47   4
  -4  -2  -9  102.10    0.81   4
  -3  -8 -11    2.30    0.88   4
  -3  -7 -11   18.03    0.91   4
  -2  -8 -11   63.24    0.81   4
 -10  -4  -5    4.21    0.72   4
  -8  -7  -8   51.02    0.78   4
  -8   2  -1    4.40    0.42   4
  -7  -4  -9   82.11    0.93   4
  -6  -7 -10   42.52    0.92   4
  -6  -1  -8  103.56    0.88   4
  -6   0  -7  421.82    1.21   4
  -4   0  -7    0.65    0.38   4
  -2  -9 -11   12.05    0.76   4
  -2  -7 -11   89.78    0.85   4
  -2  -4 -10  328.61    1.02   4
 -10  -5  -5   62.84    0.77   4
 -10  -3  -5   25.80    0.81   4
 -10   0  -2  597.17    1.41   4
  -9  -5  -7   48.33    0.85   4
  -9  -4  -7   21.63    0.89   4
  -8  -3  -8   67.80    1.00   4
  -7  -8  -9  155.32    0.95   4
  -7   2  -3   89.54    0.60   4
  -6  -5 -10    4.43    0.86   4
  -4  -7 -11    5.13    0.85   4
  -3  -9 -11    4.66    0.76   4
  -3  -6 -11    6.06    0.81   4
  -3  -1  -8  204.23    0.71   4
 -11  -4  -2    5.80    0.62   4
 -10  -6  -5    7.44    0.58   4
  -9  -6  -7    1.07    0.68   4
  -9   1  -3  248.00    1.02   4
  -8  -1  -7   61.00    0.97   4
  -7  -3  -9   50.80    0.98   4
  -6  -2  -9   95.82    0.88   4
  -4  -8 -11    2.10    0.79   4
  -4  -6 -11    2.74    0.84   4
  -2  -6 -11   51.64    0.76   4
 -11  -3  -2   69.95    0.75   4
 -10  -1  -4   98.08    0.95   4
  -9  -3  -7   18.94    0.79   4
  -8  -8  -8   99.71    0.74   4
  -8   2  -2    3.12    0.41   4
  -7   0  -7   13.91    0.74   4
  -6  -4 -10    5.86    0.76   4
  -6   1  -6   41.67    0.60   4
  -5 -10 -10   40.42    0.68   4
  -5  -3 -10   25.04    0.88   4
  -5   1  -6  164.30    0.67   4
 -10  -2  -5    1.37    0.79   4
 -10   0  -3    2.26    0.77   4
  -9  -7  -7    2.07    0.56   4
  -9   0  -5  180.77    1.04   4
  -8  -2  -8  454.21    1.49   4
  -8   1  -5   40.56    0.72   4
  -7  -1  -8   27.75    0.74   4
  -4  -9 -11    3.78    0.72   4
  -4  -5 -11    5.34    0.86   4
  -3 -10 -11    3.40    0.73   4
  -3  -5 -11   97.50    0.93   4
 -11  -4  -3    9.88    0.63   4
 -11  -2  -2   12.38    0.74   4
  -9  -2  -7   30.75    0.93   4
  -5  -7 -11    2.04    0.81   4
  -2  -2  -9   32.20    0.48   4
  -1  -4 -10   82.56    0.61   4
 -11  -3  -3   16.61    0.68   4
 -10  -4  -6    6.36    0.73   4
  -8  -6  -9   -0.03    0.73   4
  -8  -5  -9  142.10    1.02   4
  -8  -4  -9   16.44    0.85   4
  -8   2  -3    3.29    0.48   4
  -7  -6 -10   61.93    0.89   4
  -7  -5 -10   11.06    0.85   4
  -7  -2  -9  280.80    1.27   4
  -7   2  -4  238.51    0.83   4
  -6  -3 -10    6.76    0.76   4
  -5  -8 -11    7.47    0.77   4
  -5  -1  -9   53.04    0.79   4
  -2  -5 -11   96.56    0.79   4
  -1  -6 -11  237.79    0.91   4
 -10  -3  -6    2.20    0.74   4
  -6   0  -8   55.49    0.77   4
  -5   0  -8  406.61    1.10   4
  -4  -1  -9  170.80    0.86   4
  -2  -3 -10   99.41    0.68   4
 -11  -2  -3   18.27    0.77   4
 -10  -1  -5  211.26    1.12   4
 -10   0  -4   32.55    0.85   4
  -9  -5  -8    1.67    0.63   4
  -9  -4  -8   32.21    0.83   4
  -8  -7  -9   64.35    0.73   4
  -8  -3  -9  166.89    1.14   4
  -8   0  -7  235.38    1.18   4
  -7  -7 -10   22.21    0.76   4
  -7  -4 -10   68.74    0.89   4
  -6  -1  -9    8.62    0.68   4
  -5  -2 -10   49.76    0.92   4
  -4 -10 -11    4.86    0.60   4
  -4  -2 -10   34.03    0.81   4
  -4   0  -8  352.87    0.98   4
  -3  -4 -11    1.77    0.72   4
 -10  -2  -6   19.70    0.84   4
 -10   1  -2   -1.63    0.64   4
  -9  -6  -8    2.70    0.60   4
  -9  -3  -8   59.95    0.95   4
  -9   0  -6    9.18    0.81   4
  -8  -1  -8   67.64    0.86   4
  -5  -9 -11    0.65    0.65   4
 -11  -4  -4    2.28    0.57   4
 -11  -3  -4   16.03    0.68   4
  -9   2  -2   95.86    0.66   4
  -8   2  -4  150.21    0.81   4
  -7  -8 -10   32.98    0.69   4
  -7  -3 -10   58.20    1.00   4
  -7   0  -8  637.16    1.55   4
  -6  -5 -11    3.89    0.88   4
  -6   1  -7   28.87    0.57   4
  -5   1  -7  605.23    1.20   4
  -3  -2 -10  197.44    0.87   4
  -9   1  -5  144.90    0.96   4
  -7  -1  -9    3.02    0.72   4
  -7   2  -5  177.76    0.80   4
  -6  -4 -11    5.76    0.91   4
  -3  -8 -12   50.50    0.90   4
  -3  -7 -12    1.33    0.78   4
  -2  -4 -11   45.75    0.67   4
  -1  -5 -11   15.77    0.55   4
 -11  -2  -4   30.14    0.76   4
 -11  -1  -3    4.51    0.71   4
 -10  -1  -6    8.80    0.89   4
 -10   1  -3  532.20    1.33   4
  -9  -2  -8    9.16    0.78   4
  -7   1  -7   13.24    0.63   4
  -6  -8 -11   23.89    0.69   4
  -5  -3 -11    7.72    0.94   4
  -4  -7 -12   23.61    0.85   4
  -4  -6 -12    3.58    0.84   4
  -3  -6 -12   83.41    0.92   4
  -2  -7 -12   63.78    0.85   4
  -9   2  -3   82.90    0.70   4
  -4  -8 -12    2.84    0.76   4
  -4   1  -7  306.34    0.81   4
  -3  -9 -12   -0.22    0.73   4
  -3  -3 -11  259.04    1.06   4
  -3   0  -8  834.67    1.25   4
 -11  -4  -5   11.37    0.57   4
 -11  -3  -5    7.63    0.70   4
  -8  -6 -10  204.68    1.00   4
  -8  -5 -10    7.71    0.66   4
  -8  -4 -10  146.92    1.07   4
  -8   0  -8  348.12    1.32   4
  -8   2  -5  161.63    0.87   4
  -7  -2 -10  161.60    1.06   4
  -6  -3 -11    3.32    0.87   4
  -5   0  -9   15.55    0.65   4
  -4  -5 -12    4.49    0.89   4
  -2  -6 -12   78.82    0.79   4
  -1  -3 -10   13.62    0.42   4
 -11  -1  -4   27.32    0.72   4
 -10  -2  -7   55.98    0.90   4
 -10   1  -4  103.61    0.88   4
  -9  -5  -9   71.46    0.80   4
  -9  -4  -9   70.51    0.86   4
  -7  -6 -11  102.78    0.95   4
  -7  -5 -11    3.48    0.85   4
  -6   0  -9  111.96    0.86   4
  -6   2  -6   75.57    0.64   4
  -5  -7 -12   41.98    0.85   4
  -5  -6 -12   12.78    0.82   4
  -5  -1 -10    6.86    0.68   4
  -4  -9 -12    5.04    0.67   4
  -3  -5 -12    6.33    0.75   4
 -11  -2  -5    2.55    0.67   4
  -9  -6  -9   10.25    0.58   4
  -9  -3  -9   31.97    0.87   4
  -9   1  -6    9.01    0.78   4
  -9   2  -4   19.32    0.63   4
  -8  -3 -10   19.35    0.87   4
  -8  -1  -9  302.16    1.25   4
  -6  -1 -10   29.56    0.78   4
  -6   1  -8   10.34    0.65   4
  -5  -5 -12    4.38    0.87   4
  -5   2  -6  488.13    1.02   4
  -4  -1 -10    6.26    0.58   4
  -4   0  -9    2.00    0.54   4
  -2  -2 -10  301.48    0.90   4
  -2  -1  -9   39.56    0.46   4
 -11   0  -3   39.16    0.76   4
 -10   0  -6   26.09    0.85   4
  -8   3  -2   65.07    0.54   4
  -7  -7 -11    1.91    0.65   4
  -7   0  -9   50.80    0.90   4
  -7   3  -3  254.25    0.76   4
  -5  -8 -12    3.10    0.68   4
  -5  -2 -11   28.88    0.91   4
  -5   1  -8   65.59    0.61   4
  -4  -4 -12   26.15    0.87   4
  -2  -5 -12  121.95    0.90   4
  -1  -4 -11  305.35    0.94   4
 -10  -4  -8    3.97    0.65   4
 -10  -1  -7   39.83    0.88   4
  -9  -2  -9    1.59    0.82   4
  -7  -3 -11   19.97    0.93   4
  -7  -1 -10   36.63    0.95   4
  -7   1  -8   16.19    0.76   4
  -6  -2 -11  105.51    1.06   4
  -3  -4 -12  143.59    0.97   4
  -2  -3 -11  171.21    0.83   4
 -11  -3  -6   12.27    0.70   4
 -11  -1  -5    8.26    0.70   4
 -10   1  -5   92.27    0.93   4
  -8  -2 -10  324.39    1.29   4
  -8   2  -6   79.10    0.81   4
  -8   3  -3    4.39    0.49   4
 -11   0  -4    6.91    0.69   4
  -9   0  -8    6.12    0.90   4
  -9   2  -5   15.78    0.71   4
  -7   3  -4   51.28    0.53   4
  -6  -7 -12    4.05    0.66   4
  -6  -4 -12    6.63    0.93   4
  -4   1  -8   82.01    0.55   4
  -3  -2 -11    2.29    0.62   4
 -11  -2  -6    5.59    0.68   4
 -10   2  -3   20.56    0.64   4
  -9   1  -7  266.97    1.22   4
  -8   0  -9   14.12    0.88   4
  -8   1  -8  221.22    1.16   4
  -7   2  -7   18.31    0.70   4
  -6   2  -7  140.12    0.75   4
  -4  -3 -12   19.54    0.86   4
  -3   0  -9   11.84    0.47   4
 -10   0  -7   34.13    0.87   4
  -9  -4 -10   28.39    0.74   4
  -9  -1  -9  156.00    1.10   4
  -8  -5 -11   69.00    0.80   4
  -8  -4 -11    4.21    0.78   4
  -8   3  -4    6.88    0.51   4
  -7  -2 -11   76.86    0.92   4
  -6   0 -10    9.86    0.84   4
  -5   0 -10  112.08    0.90   4
  -5   2  -7  114.27    0.67   4
  -2  -4 -12  247.71    1.00   4
 -11  -1  -6    4.02    0.75   4
 -11   0  -5    5.20    0.77   4
  -9  -5 -10    8.48    0.52   4
  -9  -3 -10   18.22    0.80   4
  -8  -6 -11   32.78    0.65   4
  -8  -1 -10  100.42    0.96   4
  -6  -3 -12    4.75    0.96   4
  -6   1  -9   99.57    0.90   4
  -5  -1 -11    3.04    0.82   4
  -4  -7 -13    2.49    0.85   4
  -4  -6 -13    2.21    0.77   4
  -3  -7 -13   79.35    0.88   4
  -3  -6 -13   30.39    0.86   4
 -10   2  -4    6.30    0.67   4
  -9   2  -6   47.65    0.81   4
  -8  -3 -11   82.68    0.88   4
  -7  -5 -12   18.84    0.80   4
  -7   0 -10  249.15    1.26   4
  -7   1  -9   28.48    0.83   4
  -7   3  -5   36.98    0.51   4
  -6  -1 -11   32.36    0.83   4
  -5   1  -9  230.46    0.96   4
  -3  -3 -12  161.67    0.98   4
 -11  -3  -7    6.57    0.60   4
 -10  -4  -9    2.76    0.58   4
 -10  -3  -9    3.12    0.69   4
  -9   3  -3  298.43    0.94   4
  -7  -4 -12    5.00    0.82   4
  -5  -6 -13   29.44    0.84   4
  -4  -8 -13   26.07    0.70   4
  -4  -5 -13    7.40    0.82   4
  -4   0 -10   94.91    0.71   4
  -1  -3 -11   24.78    0.53   4
  -1  -2 -10    8.49    0.39   4
 -11  -2  -7    2.53    0.66   4
 -11   1  -4    3.49    0.68   4
  -9   0  -9    1.19    0.89   4
  -8  -2 -11   18.11    0.90   4
  -8   3  -5   15.85    0.61   4
  -5  -7 -13   40.83    0.75   4
  -5  -5 -13   11.44    0.85   4
  -3  -5 -13   55.70    0.85   4
  -2  -6 -13  170.23    1.01   4
  -2  -2 -11   16.56    0.56   4
  -2  -1 -10    7.68    0.46   4
 -11   0  -6   29.13    0.82   4
 -10  -2  -9    5.73    0.77   4
 -10   2  -5  133.39    0.92   4
  -9   3  -4   10.21    0.60   4
  -8   1  -9  278.30    1.26   4
  -7  -3 -12   43.05    0.82   4
  -7   2  -8  173.13    1.01   4
  -6  -2 -12   10.29    0.94   4
  -4  -4 -13    5.00    0.85   4
  -4  -2 -12   84.86    0.93   4
  -4   1  -9  210.68    0.86   4
 -11  -1  -7   -0.38    0.71   4
 -10   0  -8    4.65    0.84   4
 -10   1  -7   12.19    0.82   4
  -9  -1 -10    3.66    0.84   4
  -9   2  -7    3.97    0.80   4
  -8   0 -10  200.50    1.12   4
  -6   3  -6   24.13    0.55   4
  -5   2  -8  531.73    1.19   4
  -3  -1 -11  358.08    1.10   4
  -2  -3 -12  361.58    1.15   4
 -11   1  -5   41.09    0.79   4
  -8   2  -8  508.55    1.48   4
  -8   3  -6  115.19    0.85   4
  -6  -6 -13   21.64    0.76   4
  -3  -4 -13  112.27    0.92   4
  -2  -5 -13   41.09    0.78   4
  -1  -4 -12  190.49    0.86   4
 -10   2  -6  105.32    1.04   4
  -9  -4 -11    0.89    0.61   4
  -9   3  -5   65.11    0.76   4
  -8  -1 -11   74.84    1.01   4
  -7  -2 -12   27.31    0.83   4
  -6   0 -11  105.71    0.96   4
  -5   0 -11   12.41    0.86   4
  -3  -2 -12  427.76    1.27   4
  -9  -3 -11  103.01    0.88   4
  -8  -5 -12  125.80    0.84   4
  -8  -4 -12   93.05    0.87   4
  -7   0 -11    8.57    0.91   4
  -7   1 -10   21.71    0.89   4
  -5  -3 -13  104.60    1.09   4
  -5  -1 -12    4.23    0.90   4
  -5   1 -10   21.73    0.74   4
  -5   3  -6   26.03    0.45   4
  -4  -3 -13   45.21    0.93   4
 -11  -2  -8    0.31    0.63   4
 -11   0  -7   11.14    0.75   4
 -10  -3 -10   69.62    0.75   4
  -9   1  -9  377.36    1.44   4
  -8  -3 -12   72.41    0.90   4
  -7   3  -7   69.60    0.79   4
  -6  -1 -12    5.15    0.80   4
 -11   1  -6    3.73    0.72   4
 -11   2  -4   71.96    0.86   4
 -10   1  -8   63.41    0.95   4
 -10   3  -4   30.77    0.74   4
  -9  -2 -11    2.83    0.67   4
  -9   0 -10   45.29    0.84   4
  -9   3  -6   58.72    0.84   4
  -7   2  -9   92.78    0.87   4
  -6   3  -7  230.26    0.86   4
  -4   0 -11    1.76    0.62   4
  -4   2  -8  474.19    1.02   4
  -3   1  -9  131.08    0.66   4
  -2  -4 -13   31.37    0.77   4
 -11  -1  -8    6.89    0.69   4
 -10  -2 -10   33.86    0.76   4
  -8  -2 -12   89.69    1.00   4
  -8   1 -10   29.25    0.84   4
  -7  -1 -12   34.20    0.86   4
  -4   1 -10   33.46    0.66   4
  -3  -3 -13  175.04    1.01   4
 -10   2  -7    1.35    0.83   4
  -9  -1 -11  184.20    1.12   4
  -8   0 -11    1.45    0.78   4
  -8   2  -9   48.12    0.95   4
  -8   4  -3   47.42    0.51   4
  -7  -3 -13    2.41    0.82   4
  -7   4  -4  412.05    0.97   4
  -5   2  -9    5.80    0.53   4
  -4  -7 -14   29.86    0.75   4
  -4  -6 -14    4.68    0.76   4
  -3  -6 -14  100.11    0.94   4
  -2  -1 -11  269.99    0.91   4
  -1  -2 -11  204.39    0.75   4
 -11   2  -5    4.37    0.69   4
 -10  -1 -10   28.91    0.84   4
 -10   3  -5  204.80    1.04   4
  -8   4  -4   49.75    0.59   4
  -6  -2 -13    7.83    0.85   4
  -5  -5 -14  105.45    0.97   4
  -5   3  -7  441.06    1.00   4
  -4  -5 -14   10.45    0.79   4
  -4  -2 -13    6.38    0.86   4
  -2  -2 -12  242.03    0.95   4
 -11   0  -8   19.27    0.77   4
 -11   1  -7    2.45    0.74   4
  -9   3  -7  630.50    1.56   4
  -8  -1 -12   64.62    0.96   4
  -7   3  -8  393.04    1.27   4
  -6   0 -12    2.68    0.90   4
  -6   1 -11   41.28    0.92   4
  -3  -5 -14  104.35    0.94   4
  -3  -1 -12    9.06    0.68   4
  -2   0 -10  523.63    1.08   4
  -1  -3 -12   48.38    0.59   4
  -1  -1 -10  291.94    0.79   4
  -9   1 -10   15.12    0.89   4
  -9   4  -3   15.68    0.57   4
  -8   4  -5  176.77    0.87   4
  -7  -2 -13    1.76    0.91   4
  -7   1 -11    5.93    0.79   4
  -7   4  -5   97.94    0.67   4
  -6   3  -8   59.71    0.67   4
  -5  -4 -14    9.95    0.85   4
  -5   0 -12   84.66    1.03   4
  -5   1 -11    1.91    0.75   4
  -4  -4 -14   81.73    0.98   4
  -3   0 -11  101.39    0.71   4
 -11  -1  -9   39.60    0.77   4
 -11   2  -6   87.62    0.87   4
 -10   2  -8    1.38    0.83   4
 -10   3  -6   20.97    0.81   4
  -9  -3 -12    3.90    0.63   4
  -9   4  -4   11.35    0.63   4
  -7   0 -12   67.66    0.94   4
  -7   2 -10  584.51    1.56   4
  -6  -5 -14   46.44    0.82   4
  -4   2  -9    5.91    0.51   4
  -2  -3 -13   32.83    0.71   4
 -12   0  -6    7.59    0.63   4
 -10   0 -10    1.04    0.71   4
  -9  -2 -12   25.38    0.74   4
  -8  -4 -13   11.73    0.65   4
  -8   1 -11  194.28    1.24   4
  -6  -1 -13    7.68    1.01   4
  -6   4  -5 1379.71    1.62   4
  -5  -3 -14  162.71    1.13   4
  -3  -4 -14  101.45    0.92   4
  -3  -2 -13  134.69    0.96   4
 -11   1  -8    9.80    0.86   4
 -10  -2 -11   28.44    0.70   4
  -9   4  -5   10.89    0.63   4
  -8  -3 -13   25.30    0.69   4
  -8   2 -10  108.03    0.98   4
  -8   4  -6   41.90    0.76   4
  -7   4  -6  264.80    0.92   4
  -5   2 -10  375.70    1.14   4
  -4  -3 -14   43.24    0.90   4
  -9   3  -8   61.94    0.86   4
  -8  -2 -13   -0.62    0.75   4
  -8   0 -12   40.09    0.95   4
  -7  -1 -13    9.82    0.90   4
  -7   3  -9  231.91    1.15   4
  -6  -3 -14    6.82    0.85   4
  -4  -1 -13   87.42    0.99   4
  -4   1 -11  159.55    0.87   4
 -11   2  -7    3.46    0.76   4
 -10  -1 -11    5.92    0.71   4
 -10   3  -7    4.98    0.80   4
  -9  -1 -12   11.52    0.80   4
  -8   3  -9  499.43    1.53   4
  -6   3  -9  135.92    0.92   4
 -12   0  -7   29.70    0.66   4
 -11   3  -5  168.94    1.00   4
 -10   2  -9   17.57    0.89   4
  -9   1 -11  301.34    1.33   4
  -9   2 -10   91.12    1.07   4
  -9   4  -6  161.08    0.97   4
  -6   1 -12   14.80    0.93   4
  -5  -2 -14   58.09    1.00   4
  -3  -3 -14   43.16    0.82   4
  -2  -1 -12  317.52    1.03   4
 -10   4  -4  166.15    0.87   4
  -8  -1 -13   32.55    0.88   4
  -8   4  -7   37.78    0.72   4
  -7   1 -12   17.63    0.86   4
  -7   2 -11   12.06    0.94   4
  -6   0 -13   24.87    0.96   4
  -6   2 -11  107.70    1.04   4
  -4   2 -10   74.21    0.72   4
  -2  -4 -14   82.60    0.86   4
  -1  -2 -12   91.42    0.69   4
 -10   0 -11    3.54    0.77   4
 -10   4  -5   11.76    0.76   4
  -6   4  -7   60.35    0.66   4
  -5   1 -12   71.83    0.88   4
  -5   3  -9  285.16    1.01   4
  -4  -2 -14   10.65    0.86   4
  -3  -1 -13  707.17    1.57   4
  -3   0 -12  364.20    1.17   4
  -3   2  -9    8.55    0.47   4
  -2  -2 -13   47.70    0.73   4
  -2   0 -11   45.68    0.60   4
  -1  -1 -11    9.15    0.44   4
 -11   1  -9   21.82    0.78   4
 -11   2  -8   21.27    0.79   4
 -11   3  -6    4.08    0.74   4
 -10   3  -8  160.13    1.08   4
  -9   0 -12   47.24    0.80   4
  -9   4  -7   87.83    0.96   4
  -8   1 -12   46.20    1.02   4
  -8   2 -11   57.93    1.01   4
  -7   0 -13    1.44    0.81   4
  -5   2 -11  135.08    0.96   4
  -5   4  -6  807.78    1.25   4
  -4  -6 -15   10.64    0.70   4
  -4  -5 -15   24.52    0.82   4
  -4   3  -8  234.97    0.76   4
 -12   1  -7    0.71    0.64   4
  -7   3 -10    6.34    0.75   4
  -7   4  -8  470.79    1.34   4
  -6   3 -10   16.86    0.78   4
  -5  -5 -15   41.84    0.77   4
 -11   0 -10   56.96    0.74   4
 -10   4  -6   35.08    0.80   4
  -9  -2 -13    2.18    0.60   4
  -8   0 -13    3.06    0.86   4
  -4  -4 -15   36.51    0.84   4
   0  -2 -11  158.28    0.66   4
 -11   3  -7    0.36    0.75   4
 -10  -1 -12   17.88    0.67   4
 -10   1 -11   22.07    0.85   4
  -9   2 -11   15.70    0.93   4
  -8  -3 -14   51.42    0.75   4
  -7  -1 -14    0.68    0.87   4
  -6  -4 -15   81.97    0.87   4
  -6   4  -8  518.38    1.25   4
  -5   4  -7    5.10    0.48   4
  -3  -2 -14   59.69    0.86   4
  -2  -3 -14  193.62    0.96   4
 -10   3  -9    8.99    0.87   4
  -9  -1 -13   25.88    0.74   4
  -9   1 -12   29.61    0.91   4
  -9   3 -10   77.21    1.06   4
  -9   4  -8  168.43    1.10   4
  -8  -2 -14    5.81    0.73   4
  -8   5  -4   37.11    0.56   4
  -8   5  -3   14.58    0.48   4
  -5  -3 -15   -0.34    0.80   4
  -4  -1 -14   58.30    0.94   4
  -3  -4 -15    2.64    0.81   4
 -11   2  -9    5.89    0.77   4
 -10   4  -7    6.17    0.81   4
  -8   5  -5   17.15    0.59   4
  -7   1 -13   28.17    1.02   4
  -7   2 -12  124.61    1.05   4
  -7   4  -9   17.52    0.83   4
  -7   5  -4   26.76    0.47   4
  -6  -3 -15  185.33    1.09   4
  -6   1 -13   18.75    0.85   4
  -5   3 -10   33.25    0.64   4
  -4  -3 -15   88.51    0.92   4
  -4   2 -11   18.37    0.63   4
  -4   3  -9  425.29    1.05   4
  -3   2 -10  703.45    1.32   4
 -12   1  -8    0.85    0.57   4
 -10   0 -12   18.17    0.72   4
  -9   5  -4   14.54    0.57   4
  -8   2 -12   71.98    1.07   4
  -8   4  -9   19.92    0.92   4
  -7   3 -11   12.44    0.90   4
  -5   1 -13  158.94    1.14   4
 -12   2  -7   38.67    0.68   4
 -11   3  -8   11.62    0.78   4
  -9   0 -13   43.37    0.84   4
  -9   5  -5   79.26    0.79   4
  -8   1 -13   36.61    0.96   4
  -8   3 -11  196.53    1.26   4
  -8   5  -6   37.31    0.72   4
  -7   5  -6   24.78    0.60   4
  -6  -2 -15   54.79    0.92   4
  -6   3 -11  138.00    1.06   4
  -6   4  -9   59.14    0.80   4
  -5  -2 -15  156.69    1.14   4
  -5   2 -12   52.43    0.92   4
  -5   4  -8 1243.97    1.71   4
  -3   0 -13    2.36    0.74   4
  -2  -1 -13  117.05    0.81   4
  -2   0 -12  896.53    1.53   4
 -10   4  -8   19.95    0.87   4
  -7  -3 -15   38.84    0.73   4
  -7   0 -14  280.44    1.26   4
  -3  -3 -15  181.45    1.06   4
  -3   1 -12   37.99    0.74   4
  -3   3  -8   11.59    0.43   4
  -1  -2 -13   97.09    0.75   4
  -1  -1 -12  137.39    0.73   4
 -11   4  -6  140.04    0.94   4
 -10   2 -11   15.68    0.80   4
  -9   5  -6  325.17    1.15   4
  -8   5  -7  487.76    1.36   4
  -6   5  -5  112.88    0.62   4
  -4  -2 -15    2.68    0.81   4
  -3  -1 -14   79.78    0.92   4
  -2  -2 -14  220.26    1.00   4
 -12   2  -8    3.36    0.66   4
 -11   2 -10    8.04    0.71   4
 -10   1 -12    5.09    0.75   4
  -9   2 -12   68.33    0.88   4
  -9   3 -11  181.81    1.23   4
  -8   0 -14   62.10    0.90   4
  -8   4 -10   62.04    1.04   4
  -7   4 -10   10.10    0.85   4
  -5   3 -11  453.63    1.34   4
  -4   3 -10   21.17    0.64   4
  -2   1 -11  602.80    1.22   4
 -11   3  -9   65.11    0.87   4
 -11   4  -7    6.03    0.80   4
 -10   5  -5  277.42    1.05   4
  -9   1 -13   83.04    0.95   4
  -9   5  -7  102.82    0.98   4
  -5  -1 -15  173.38    1.15   4
  -5   4  -9    4.41    0.62   4
  -4   0 -14  198.84    1.14   4
  -4   4  -7  273.58    0.78   4
 -10   4  -9   17.77    0.86   4
 -10   5  -6    3.18    0.80   4
  -9  -1 -14    1.95    0.60   4
  -7   2 -13   63.42    0.95   4
  -7   3 -12    8.97    0.93   4
  -6   2 -13   15.50    0.96   4
  -6   4 -10  281.62    1.16   4
  -4   2 -12  104.72    0.85   4
 -12   3  -7    4.33    0.71   4
  -8   2 -13    5.56    0.93   4
  -8   3 -12    7.92    0.94   4
  -7   1 -14   33.40    0.97   4
  -6   1 -14   18.47    0.88   4
  -6   3 -12   44.38    0.94   4
  -6   5  -7  191.60    0.82   4
  -5  -4 -16   -0.42    0.68   4
  -3  -2 -15    0.13    0.77   4
  -3   3  -9  491.25    1.07   4
  -9   5  -8    7.93    0.83   4
  -5   2 -13   70.40    1.00   4
  -4  -4 -16   10.00    0.67   4
  -4  -1 -15   55.68    0.92   4
   0  -1 -11   50.23    0.48   4
 -12   2  -9    5.21    0.58   4
 -11   4  -8    1.43    0.73   4
 -10   2 -12   65.36    0.90   4
 -10   5  -7    0.99    0.76   4
  -9   0 -14   25.05    0.69   4
  -8   1 -14   43.58    0.93   4
  -7   4 -11    3.81    0.89   4
  -6  -3 -16   17.63    0.75   4
  -5  -3 -16   36.71    0.81   4
  -2   0 -13   26.53    0.68   4
 -12   3  -8   13.33    0.69   4
 -11   2 -11    5.78    0.66   4
 -11   3 -10    6.61    0.77   4
  -9   2 -13   65.12    0.93   4
  -9   3 -12    1.02    0.89   4
  -8  -1 -15    5.83    0.68   4
  -8   4 -11    8.59    0.83   4
  -7   0 -15    1.54    0.86   4
  -6   5  -8   17.26    0.59   4
  -5   0 -15  175.77    1.17   4
  -5   3 -12   48.86    0.88   4
  -5   4 -10   30.86    0.66   4
  -5   5  -6  388.17    0.93   4
  -4  -3 -16    7.63    0.74   4
  -4   3 -11  262.78    1.01   4
  -3   1 -13  702.77    1.56   4
  -2  -1 -14  540.33    1.36   4
 -10   1 -13   55.43    0.77   4
 -10   4 -10   16.13    0.88   4
 -10   5  -8   36.52    0.96   4
  -9   5  -9  192.99    1.19   4
  -7   5  -9  103.44    0.90   4
  -6  -2 -16   71.51    0.95   4
  -6   4 -11    4.22    0.84   4
  -5  -2 -16    5.87    0.84   4
  -2   1 -12  262.10    0.97   4
  -1  -1 -13  137.13    0.80   4
 -11   4  -9   11.34    0.84   4
  -9   4 -11   41.64    0.90   4
  -5   5  -7   31.49    0.56   4
  -4   1 -14   55.95    0.94   4
  -4   4  -9   81.17    0.61   4
  -3  -1 -15  258.48    1.19   4
  -3   3 -10   45.06    0.62   4
  -1   0 -12   17.74    0.57   4
 -11   5  -6    4.02    0.73   4
  -9   1 -14    1.61    0.70   4
  -8   0 -15   34.86    0.79   4
  -7   2 -14   37.86    1.00   4
  -6   2 -14   20.70    0.96   4
  -6   5  -9    7.61    0.75   4
  -4  -2 -16   61.80    0.92   4
  -9   6  -5    1.47    0.68   4
  -8   2 -14   17.68    0.89   4
  -8   3 -13   11.73    0.83   4
  -8   5 -10   34.46    1.01   4
  -8   6  -6  230.99    0.99   4
  -8   6  -5  350.29    1.05   4
  -8   6  -4    5.71    0.49   4
  -6   3 -13    2.21    0.91   4
  -4   0 -15   13.72    0.88   4
 -12   3  -9    1.63    0.59   4
 -11   3 -11   36.96    0.76   4
 -11   5  -7   45.06    0.79   4
 -10   3 -12   45.30    0.82   4
 -10   5  -9    3.73    0.89   4
  -9   6  -6    5.54    0.69   4
  -9   6  -4   12.36    0.57   4
  -8   4 -12   26.45    1.01   4
  -7   1 -15  164.87    1.18   4
  -7   4 -12   18.67    0.96   4
  -7   5 -10   63.90    0.86   4
  -7   6  -5    7.70    0.52   4
  -6  -1 -16   11.29    0.77   4
  -5  -1 -16   21.10    0.86   4
  -5   4 -11   10.84    0.67   4
  -5   5  -8   13.64    0.51   4
 -10   2 -13    2.65    0.69   4
  -9   3 -13   55.89    0.94   4
  -8   6  -7  134.35    0.96   4
  -8   6  -3  116.52    0.62   4
  -7  -1 -16    6.70    0.72   4
  -7   6  -6  421.41    1.14   4
  -7   6  -4  625.04    1.16   4
  -5   2 -14  266.79    1.24   4
  -4   3 -12  173.84    0.96   4
  -1   1 -11   71.48    0.61   4
 -11   4 -10   19.93    0.78   4
 -11   5  -8    3.73    0.83   4
  -9   4 -12  111.24    1.10   4
  -9   6  -7   51.59    0.86   4
  -8   1 -15  143.40    1.00   4
  -6   5 -10   45.99    0.83   4
  -5   1 -15   81.05    0.96   4
  -5   3 -13  293.96    1.29   4
  -3   3 -11 1400.02    1.90   4
   0  -1 -12   57.67    0.57   4
 -10   6  -6   49.96    0.84   4
  -9   2 -14   37.82    0.72   4
  -8   6  -8  294.78    1.25   4
  -5   5  -9  126.48    0.82   4
  -4  -1 -16   21.30    0.80   4
  -3  -2 -16   13.26    0.76   4
  -3   1 -14   79.88    0.94   4
  -3   4  -8   26.99    0.44   4
 -10   5 -10   14.24    0.87   4
  -9   6  -8   76.56    0.97   4
  -8   5 -11   78.69    0.95   4
  -7   5 -11   47.16    1.01   4
  -6   0 -16  199.44    1.13   4
  -3   2 -13  116.13    0.93   4
  -2   3  -9  158.78    0.63   4
 -10   6  -7    2.78    0.75   4
  -9   5 -11  116.35    1.18   4
  -7   3 -14    5.73    0.84   4
  -6   6  -6    5.18    0.50   4
  -6   6  -5  959.69    1.40   4
  -5   0 -16   -0.80    0.82   4
  -4   1 -15  198.02    1.15   4
  -4   5  -7   10.93    0.47   4
  -2  -1 -15   42.47    0.75   4
 -12   4  -9   22.55    0.70   4
 -11   3 -12   10.40    0.66   4
 -11   5  -9   38.05    0.79   4
 -10   3 -13   15.10    0.75   4
  -9   1 -15    8.49    0.62   4
  -8   3 -14   38.49    0.84   4
  -8   4 -13   -0.10    0.95   4
  -7   4 -13   89.15    1.10   4
  -6   3 -14   79.51    0.96   4
  -3   4  -9  240.14    0.84   4
  -1  -1 -14   57.20    0.69   4
  -1   0 -13  138.16    0.78   4
 -11   4 -11   33.49    0.77   4
 -10   6  -8    4.82    0.81   4
  -9   6  -9  103.63    1.05   4
  -8   2 -15   54.94    0.89   4
  -7   6  -9   54.21    0.94   4
  -6   5 -11  167.71    1.00   4
  -5  -2 -17   18.84    0.74   4
  -5   5 -10   48.65    0.70   4
  -4   3 -13  272.73    1.23   4
  -4   5  -8  107.82    0.68   4
 -10   5 -11    7.82    0.85   4
  -9   3 -14    9.06    0.79   4
  -9   4 -13   25.84    0.91   4
  -6   4 -13  143.66    1.05   4
  -6   6  -8  223.18    0.98   4
  -4   0 -16  140.01    1.03   4
  -1   1 -12  114.93    0.69   4
 -11   5 -10   21.85    0.84   4
  -8   5 -12    3.99    0.83   4
  -8   6 -10  141.09    1.16   4
  -7   5 -12   16.33    0.98   4
  -5   3 -14    7.57    0.83   4
  -1   2 -10   17.43    0.44   4
 -11   6  -7   17.78    0.75   4
 -10   6  -9   72.64    0.95   4
  -9   5 -12    2.50    0.95   4
  -6  -1 -17   23.91    0.71   4
  -6   6  -9   85.74    0.86   4
  -5   1 -16   16.96    0.86   4
  -4  -2 -17   30.51    0.72   4
  -4   5  -9    8.04    0.59   4
  -3   4 -10  293.41    0.94   4
 -12   4 -10   41.95    0.65   4
  -9   2 -15   15.07    0.58   4
  -8   1 -16   50.46    0.73   4
  -7   6 -10    3.69    0.77   4
  -5   4 -13  118.06    1.07   4
  -5   5 -11    9.23    0.77   4
  -4   4 -12   27.75    0.82   4
  -3   1 -15  444.98    1.40   4
 -11   4 -12    9.57    0.67   4
 -11   6  -8   88.50    0.87   4
  -8   4 -14   13.16    0.90   4
  -7   3 -15   37.65    0.98   4
  -5   6  -7  250.64    0.90   4
  -5   6  -5   70.24    0.52   4
  -3   2 -14   19.19    0.72   4
  -2   0 -15  110.48    0.89   4
  -2   1 -14  376.87    1.20   4
 -10   3 -14    4.71    0.63   4
 -10   6 -10   15.17    0.88   4
  -9   7  -6    5.46    0.79   4
  -8   3 -15  105.78    1.00   4
  -8   6 -11    4.18    0.97   4
  -8   7  -6   89.23    0.80   4
  -4  -1 -17    1.32    0.78   4
  -4   2 -15   75.38    0.99   4
  -3   0 -16    6.27    0.85   4
   0   0 -12   16.21    0.45   4
 -12   5  -9    1.49    0.62   4
 -11   5 -11   60.12    0.85   4
  -9   7  -7   10.35    0.79   4
  -9   7  -5  198.16    0.94   4
  -8   5 -13   37.03    1.03   4
  -8   7  -7  609.33    1.49   4
  -7   2 -16  211.59    1.16   4
  -7   5 -13    7.30    0.96   4
  -7   6 -11   30.84    0.95   4
  -6   0 -17  138.44    0.97   4
  -6   4 -14  159.26    1.19   4
  -5   6  -8  634.28    1.31   4
  -4   1 -16  115.94    1.05   4
  -4   5 -10  804.77    1.50   4
  -3   4 -11    1.26    0.67   4
  -2   2 -13   95.40    0.84   4
  -1   0 -14  185.39    0.92   4
  -1   2 -11  342.45    0.94   4
 -11   6  -9    3.16    0.72   4
  -9   4 -14    8.87    0.69   4
  -9   7  -8   44.52    0.92   4
  -8   2 -16    3.53    0.70   4
  -8   7  -8    3.28    0.81   4
  -8   7  -4    9.60    0.56   4
  -5   0 -17   50.84    0.84   4
  -2  -1 -16   18.53    0.81   4
 -10   7  -7    3.51    0.83   4
 -10   7  -6    3.93    0.68   4
  -9   3 -15   26.27    0.71   4
  -9   5 -13   94.85    0.93   4
  -7   7  -7   31.87    0.73   4
  -7   7  -6   65.93    0.72   4
  -7   7  -5   40.09    0.58   4
  -5   6  -9    9.87    0.66   4
  -3   5  -7   30.30    0.46   4
 -10   6 -11   41.89    0.93   4
  -8   7  -9  191.16    1.18   4
  -6   6 -11  241.52    1.20   4
  -5   4 -14   29.20    0.99   4
  -4   4 -13   74.13    0.88   4
  -4   5 -11  210.80    1.03   4
 -11   6 -10    6.53    0.73   4
 -10   7  -8   31.47    0.84   4
  -9   7  -9   58.93    0.96   4
  -8   6 -12   81.09    1.07   4
  -7   1 -17   60.34    0.80   4
  -7   7  -4    8.34    0.50   4
  -6   1 -17   34.52    0.81   4
  -4   0 -17   32.71    0.81   4
  -2   4  -9    5.18    0.46   4
 -11   5 -12    6.28    0.70   4
 -10   4 -14  108.22    0.83   4
 -10   5 -13    9.90    0.79   4
  -8   4 -15   52.35    0.92   4
  -7   4 -15   11.44    0.94   4
  -5   6 -10    6.59    0.64   4
  -3  -1 -17  124.77    0.91   4
  -3   2 -15  194.19    1.11   4
  -3   4 -12  212.15    1.05   4
 -10   7  -9   27.71    0.89   4
  -9   7 -10   61.27    1.03   4
  -8   5 -14    0.80    0.92   4
  -7   3 -16    5.54    0.83   4
  -7   5 -14    7.72    0.98   4
  -6   4 -15  171.53    1.18   4
  -6   7  -6   73.26    0.66   4
  -5   1 -17   10.99    0.78   4
  -3   1 -16    1.90    0.78   4
  -3   5  -9  172.42    0.75   4
  -2   1 -15   62.47    0.86   4
  -1   2 -12    2.33    0.55   4
 -11   7  -7    4.22    0.77   4
  -8   3 -16   23.44    0.76   4
  -6   7  -8   18.74    0.74   4
  -6   7  -5  177.02    0.74   4
  -5   5 -13    3.13    0.77   4
  -4   2 -16  290.46    1.29   4
  -4   3 -15  265.57    1.28   4
  -4   6  -7  170.73    0.71   4
  -4   6  -6  452.36    0.98   4
  -3   3 -14  181.74    1.08   4
  -2   2 -14  102.30    0.89   4
   0   0 -13  124.63    0.70   4
 -12   6  -9    1.92    0.67   4
 -11   6 -11   11.88    0.74   4
 -11   7  -8   72.44    0.90   4
  -9   4 -15   10.96    0.69   4
  -9   5 -14    4.18    0.68   4
  -7   7 -10   58.26    0.98   4
  -7   7  -3  693.79    1.15   4
  -6   5 -14   28.50    0.96   4
  -6   6 -12   13.35    0.79   4
  -4   5 -12   89.78    0.85   4
  -4   6  -8   17.37    0.51   4
  -2   0 -16   62.65    0.82   4
  -1   3 -10  235.46    0.78   4
 -10   7 -10   50.04    0.92   4
  -8   6 -13    0.97    0.92   4
  -6   2 -17   49.24    0.85   4
  -6   7  -9  186.98    1.04   4
  -4   1 -17    9.10    0.84   4
  -3   5 -10  298.86    0.97   4
  -1   0 -15  158.75    0.93   4
 -11   7  -9   17.74    0.86   4
  -9   6 -13    5.31    0.87   4
  -7   6 -13  154.05    1.10   4
  -6   7  -4    7.66    0.40   4
  -5   4 -15  124.55    1.13   4
  -3   0 -17   10.32    0.74   4
  -2   3 -13  362.00    1.18   4
   0   1 -12   31.02    0.54   4
 -10   5 -14   18.66    0.71   4
  -7   7 -11   37.95    0.98   4
  -6   7 -10    6.39    0.80   4
 -12   6 -10   28.12    0.61   4
  -7   4 -16  177.30    1.13   4
  -5   0 -18    0.14    0.60   4
  -4   6 -10   58.36    0.77   4
  -3   5 -11 1198.86    1.86   4
  -1   2 -13   11.07    0.61   4
  -1   3 -11    1.47    0.51   4
   0   2 -10  347.83    0.83   4
 -11   6 -12    1.80    0.68   4
 -11   7 -10    4.92    0.82   4
  -9   8  -8    4.35    0.94   4
  -9   8  -7    8.66    0.79   4
  -9   8  -6   16.86    0.71   4
  -8   4 -16   23.99    0.78   4
  -8   5 -15   64.49    0.84   4
  -8   7 -12    2.95    0.92   4
  -8   8  -7   53.44    0.85   4
  -7   5 -15  119.26    1.00   4
  -5   7  -8   79.71    0.78   4
  -5   7  -7   93.02    0.72   4
  -4   5 -13   73.04    0.89   4
  -3   2 -16   37.55    0.96   4
  -9   5 -15   49.25    0.79   4
  -9   8  -5   22.94    0.71   4
  -8   6 -14    8.23    0.92   4
  -8   8  -8   80.09    0.93   4
  -8   8  -6    5.07    0.66   4
  -7   3 -17   18.53    0.77   4
  -6   4 -16   90.07    1.04   4
  -4   3 -16   31.76    0.90   4
  -3   3 -15  227.23    1.18   4
  -2   2 -15   14.99    0.76   4
 -10   8  -8   27.02    0.90   4
 -10   8  -7    4.75    0.74   4
 -10   8  -6   26.33    0.81   4
  -9   6 -14   32.08    0.84   4
  -9   8  -9  207.40    1.23   4
  -8   8  -5  134.47    0.81   4
  -7   6 -14   88.87    1.10   4
  -7   7 -12    0.21    0.93   4
  -6   5 -15   44.51    0.87   4
  -5   7  -9   26.01    0.75   4
  -5   7  -5  180.66    0.70   4
  -4   0 -18    2.70    0.67   4
  -4   6 -11   72.07    0.88   4
  -2   1 -16   11.37    0.74   4
 -10   7 -12   46.92    0.85   4
  -7   8  -8    7.06    0.77   4
  -7   8  -7  136.48    0.91   4
  -7   8  -6  354.58    1.11   4
  -5   1 -18    4.40    0.66   4
  -4   2 -17   77.87    0.91   4
  -3   1 -17   44.65    0.82   4
  -3   4 -14    8.19    0.84   4
  -3   5 -12    0.43    0.78   4
  -2   3 -14  216.39    1.08   4
 -11   7 -11    1.83    0.71   4
 -10   8  -9   87.82    0.96   4
  -9   8 -10  319.07    1.35   4
  -5   6 -13  271.66    1.21   4
  -5   7 -10    9.49    0.76   4
  -2   5  -8    8.58    0.39   4
  -1   1 -15   19.96    0.73   4
   0   1 -13  110.60    0.69   4
  -8   7 -13   18.34    0.96   4
  -8   8  -4  136.65    0.76   4
  -7   8  -5    5.57    0.53   4
  -6   6 -14  102.12    0.99   4
  -5   3 -17   24.53    0.81   4
  -4   5 -14  160.44    1.18   4
  -3   6  -8   54.29    0.60   4
  -3   6  -7    5.97    0.45   4
  -2   5  -9    9.33    0.51   4
  -1   2 -14  141.39    0.93   4
 -10   6 -14   63.64    0.79   4
  -9   7 -13   49.00    0.86   4
  -7   7 -13    4.03    0.96   4
  -7   8 -10   11.48    0.92   4
  -6   2 -18   87.42    0.81   4
  -4   6 -12  702.19    1.60   4
  -3   6  -9    3.27    0.56   4
 -11   8  -8    8.96    0.72   4
  -9   8 -11   13.99    0.92   4
  -8   5 -16   19.09    0.75   4
  -8   6 -15   53.49    0.91   4
  -7   5 -16   23.09    0.86   4
  -5   7 -11   19.08    0.74   4
  -4   1 -18    3.65    0.67   4
  -2   4 -13    3.18    0.74   4
  -2   5 -10   91.50    0.73   4
 -12   7 -10   25.84    0.60   4
 -11   7 -12   18.53    0.68   4
 -11   8  -9   12.39    0.79   4
  -7   4 -17    3.82    0.64   4
  -7   6 -15   98.98    1.05   4
  -7   8  -4  348.44    0.97   4
  -6   5 -16   45.73    0.94   4
  -6   8  -7  753.85    1.48   4
  -6   8  -6    1.09    0.56   4
  -5   2 -18    3.17    0.68   4
  -3   6 -10   10.93    0.65   4
  -1   4 -10  143.87    0.71   4
 -10   8 -11   72.06    0.91   4
  -9   6 -15    7.31    0.68   4
  -7   8 -11   26.62    0.95   4
  -6   7 -13    1.36    0.93   4
  -6   8  -9    7.63    0.71   4
  -5   6 -14   52.17    0.98   4
  -4   4 -16  153.52    1.10   4
  -4   7  -8  278.12    0.94   4
  -4   7  -7   38.00    0.53   4
  -3   2 -17   46.46    0.88   4
  -3   4 -15  122.74    1.02   4
  -1   3 -13    3.36    0.63   4
 -11   8 -10   -0.65    0.78   4
  -8   7 -14    4.42    0.88   4
  -6   6 -15   23.49    0.94   4
  -6   8 -10   55.34    0.91   4
  -6   8  -5 1446.14    1.79   4
  -5   7 -12   37.59    0.94   4
  -4   3 -17   13.10    0.80   4
  -4   6 -13    5.96    0.84   4
  -4   7  -9   28.26    0.61   4
  -4   7  -6    0.57    0.40   4
  -2   3 -15    6.47    0.81   4
  -9   7 -14    1.78    0.76   4
  -8   8 -12   18.90    0.86   4
  -7   7 -14   43.12    1.00   4
  -6   3 -18    4.66    0.73   4
  -4   7 -10  631.53    1.49   4
  -3   6 -11   29.02    0.77   4
  -2   1 -17   52.62    0.85   4
  -1   4 -11  142.62    0.77   4
  -7   8 -12   10.36    0.93   4
   0   3 -10   15.16    0.43   4
   1   1 -11   58.98    0.51   4
 -11   8 -11   50.37    0.81   4
 -10   8 -12  119.32    0.94   4
  -9   9  -8    3.07    0.83   4
  -9   9  -7    4.91    0.77   4
  -7   8  -3    4.69    0.42   4
  -6   8 -11  150.79    1.03   4
  -2   4 -14   11.87    0.79   4
 -10   9  -8   78.82    0.95   4
  -9   9  -9   77.48    0.98   4
  -9   9  -6  259.88    1.11   4
  -8   6 -16   68.06    0.82   4
  -8   9  -9   10.63    0.87   4
  -8   9  -8   41.73    0.88   4
  -8   9  -7   10.55    0.76   4
  -7   5 -17   39.76    0.78   4
  -7   6 -16  324.62    1.29   4
  -6   7 -14    4.64    0.90   4
  -6   8  -4  148.70    0.67   4
  -5   3 -18   22.84    0.74   4
  -5   6 -15  108.14    1.07   4
  -5   8  -8  871.95    1.64   4
  -5   8  -7   64.92    0.74   4
  -4   7 -11   17.60    0.71   4
  -3   6 -12  248.35    1.14   4
   0   2 -13    5.64    0.53   4
 -10   9  -9   12.14    0.86   4
 -10   9  -7    2.97    0.72   4
  -9   9 -10  110.64    1.06   4
  -8   8 -13   55.04    0.88   4
  -8   9  -6    9.93    0.71   4
  -5   8  -9   83.84    0.81   4
  -4   6 -14  325.99    1.37   4
  -1   3 -14   20.03    0.71   4
  -1   4 -12   13.58    0.64   4
   0   3 -11  126.86    0.70   4
  -8   7 -15  131.31    1.02   4
  -7   8 -13   58.59    1.03   4
  -7   9  -8  137.26    1.00   4
  -6   8 -12    1.08    0.87   4
  -5   8 -10    4.92    0.80   4
  -3   3 -17  122.44    1.00   4
  -3   4 -16  180.37    1.11   4
 -11   8 -12    3.84    0.66   4
 -10   8 -13   13.79    0.73   4
 -10   9 -10  107.34    0.94   4
  -9   7 -15   21.67    0.70   4
  -8   9  -5   43.56    0.71   4
  -7   7 -15   57.58    0.84   4
  -7   9  -7   62.70    0.82   4
  -6   6 -16  185.74    1.07   4
  -4   4 -17    8.94    0.81   4
  -4   7 -12  206.79    1.14   4
  -2   3 -16   25.70    0.86   4
  -9   9 -11  175.43    1.14   4
  -7   9  -6   20.98    0.68   4
  -6   4 -18   24.81    0.67   4
  -5   8 -11  277.22    1.25   4
  -5   8  -5  231.13    0.82   4
  -4   5 -16   10.67    0.86   4
  -3   6 -13   68.88    0.94   4
  -2   2 -17    1.60    0.76   4
  -2   5 -13   80.57    0.88   4
  -2   6  -9   10.01    0.55   4
  -2   6  -8  139.19    0.67   4
  -2   6  -7   11.66    0.43   4
 -11   9  -9    1.31    0.70   4
  -8   8 -14    2.37    0.80   4
  -6   7 -15    2.13    0.84   4
  -6   8  -3  306.99    0.81   4
  -5   7 -14   19.08    0.81   4
  -4   3 -18    4.26    0.70   4
  -3   2 -18    3.26    0.73   4
  -3   5 -15  479.68    1.48   4
  -3   7  -9  173.72    0.88   4
  -3   7  -8   53.01    0.62   4
  -2   4 -15   28.60    0.86   4
  -1   5  -9   41.59    0.54   4
   0   3 -12    4.10    0.55   4
 -10   9 -11   70.29    0.87   4
  -9   8 -14    6.22    0.75   4
  -7   9 -11    3.48    0.90   4
  -6   8 -13   30.81    0.83   4
  -3   7  -7  172.11    0.71   4
  -2   6 -10    4.16    0.54   4
  -1   4 -13    8.49    0.67   4
   0   2 -14  171.88    0.87   4
 -11   9 -10    1.94    0.66   4
  -9   9 -12   16.22    0.86   4
  -8   9 -12    4.94    0.94   4
  -7   8 -14    8.48    0.75   4
  -7   9  -5    3.98    0.55   4
  -6   9  -9  243.48    1.17   4
  -5   4 -18    7.00    0.69   4
  -5   6 -16   29.27    0.80   4
  -5   8 -12  103.02    1.03   4
  -4   7 -13   12.71    0.75   4
  -3   7 -10  284.83    1.03   4
  -3   7  -6  148.17    0.67   4
  -1   2 -16    4.79    0.66   4
  -8   7 -16   82.18    0.82   4
  -7   6 -17    1.15    0.68   4
  -6   9 -10   39.75    0.91   4
  -6   9  -7  108.23    0.78   4
  -5   8  -4  698.29    1.19   4
  -4   8  -8  239.74    0.99   4
  -2   6 -11   23.13    0.71   4
  -1   3 -15    1.82    0.67   4
 -10   9 -12  112.55    0.92   4
  -7   7 -16   16.35    0.75   4
  -7   9 -12   17.46    0.92   4
  -6   9  -6  261.89    1.01   4
  -4   8  -9   47.52    0.68   4
  -4   8  -7   10.05    0.58   4
  -3   7 -11  586.12    1.42   4
  -2   5 -14    8.77    0.78   4
  -1   5 -11  143.76    0.83   4
  -5   7 -15   63.17    0.87   4
  -4   8 -10  130.62    0.89   4
   0   4  -9  803.83    1.22   4
   9  -9  -3   48.62    0.73   5
   9  -7   0   10.02    0.60   5
  11  -5   0   11.39    0.82   5
  12  -1  -1   12.37    0.64   5
  13  -7  -5    0.97    0.60   5
  13  -6  -4   10.76    0.74   5
  13  -2  -3   25.10    0.72   5
   6  -8  -2  185.98    0.68   5
   7  -7   0  609.13    1.23   5
   7  -6   1  769.51    1.38   5
   8  -7   0  479.24    1.25   5
   8  -6   1   57.95    0.62   5
  10  -9  -4   52.28    0.86   5
  10  -8  -2    3.54    0.78   5
  11  -9  -5   15.85    0.73   5
  11  -8  -3    0.68    0.79   5
  12  -7  -3   18.00    0.82   5
  12  -6  -2  160.20    0.99   5
  12  -2  -1    3.52    0.68   5
  13  -3  -3   -0.71    0.65   5
   7  -9  -4  410.82    1.08   5
   7  -2   3   81.78    0.56   5
   9  -3   2   12.53    0.62   5
  10  -6   0  210.70    1.09   5
  11   0   0    2.40    0.62   5
  12  -8  -5   15.88    0.85   5
   8  -4   2   44.54    0.61   5
   9   0   2  278.65    0.94   5
  10  -7  -1    9.87    0.66   5
  11  -9  -6  147.86    1.01   5
  11  -7  -2   27.28    0.86   5
  11  -6  -1   53.82    0.79   5
  13  -5  -4    7.77    0.70   5
  13  -1  -4    4.34    0.54   5
   7  -8  -2    1.07    0.50   5
   7  -1   3   19.61    0.40   5
   7   0   3  304.55    0.79   5
   8  -9  -4   13.28    0.67   5
   9  -9  -4    5.82    0.71   5
   9  -8  -2   79.33    0.87   5
   9  -5   1  107.18    0.85   5
   9  -2   2   80.18    0.74   5
   9  -1   2  463.28    1.18   5
  10   0   1    2.91    0.57   5
  11  -9 -10   24.11    0.67   5
  11  -1   0   33.94    0.71   5
  12  -5  -2    5.29    0.80   5
  12   0  -2   33.84    0.68   5
  13  -7  -8   11.28    0.61   5
  13  -7  -7    5.95    0.57   5
  13  -6  -5   22.66    0.65   5
   7  -4   2   32.15    0.51   5
  10  -9  -5    8.65    0.76   5
  10  -3   1   53.30    0.78   5
  11  -9  -9    0.42    0.73   5
  11  -8  -4   24.67    0.87   5
  11  -3   0    6.48    0.65   5
  12  -8  -6    8.27    0.70   5
  12  -7  -4   20.21    0.81   5
  13  -4  -4    9.53    0.74   5
  13  -2  -4   22.91    0.66   5
   6  -7  -1    6.51    0.39   5
   7  -9  -5    7.74    0.56   5
   9  -7  -1   39.91    0.73   5
  10  -8  -3    7.28    0.81   5
  10  -1   1  202.45    0.95   5
  12  -6  -3   45.53    0.78   5
  13  -6  -6    1.73    0.67   5
  13  -3  -4   20.04    0.67   5
   6  -8  -3   42.52    0.48   5
   9  -9  -5   27.89    0.76   5
  10  -9  -6   67.72    0.87   5
  10  -5   0   63.83    0.83   5
  11  -5  -1   27.35    0.73   5
  12  -8 -10    4.24    0.58   5
  12  -8  -9   32.72    0.69   5
  12  -8  -8    8.60    0.68   5
  12  -1  -2    5.20    0.63   5
  13  -5  -5   10.05    0.69   5
   8  -9  -5   71.20    0.76   5
   8  -5   1    1.55    0.47   5
  11  -7  -3    5.02    0.79   5
  11  -6  -2   23.04    0.82   5
  12  -7  -5   53.13    0.89   5
  12  -3  -2    1.76    0.75   5
  13  -6  -7   23.98    0.67   5
  13  -1  -5    4.84    0.53   5
   7  -7  -1  633.85    1.26   5
   8  -7  -1   72.16    0.67   5
   8  -6   0  139.31    0.79   5
  10  -9  -7   55.09    0.84   5
  10  -7  -2   31.02    0.71   5
  10  -6  -1  202.11    0.99   5
  11  -8  -5    3.14    0.72   5
  12  -5  -3   12.26    0.82   5
  13  -6  -8    0.89    0.56   5
  13  -2  -5   29.57    0.73   5
   7  -6   0   62.33    0.60   5
   8  -2   2    3.45    0.48   5
   9  -9  -6   21.36    0.71   5
  10  -9 -10   13.81    0.67   5
  10  -9  -9   48.48    0.80   5
  11  -4  -1   17.19    0.82   5
  11   0  -1   28.09    0.73   5
  13  -6  -9    3.11    0.56   5
   7  -8  -3  505.72    1.15   5
  12  -7  -6   20.53    0.79   5
  13  -1  -6    8.52    0.60   5
  11  -7  -4   12.30    0.84   5
  11  -3  -1    9.70    0.80   5
  11  -1  -1    1.96    0.68   5
  12  -4  -3   50.35    0.88   5
  13  -5  -7    6.72    0.64   5
  13  -4  -6    1.24    0.66   5
   6  -8  -4  482.12    1.02   5
   8  -9  -7  494.18    1.32   5
   8  -4   1   27.35    0.57   5
   9  -9  -8  202.45    1.04   5
   9  -7  -2   11.07    0.62   5
  11  -8 -11    9.91    0.61   5
  11  -8  -7   72.11    0.91   5
  11  -5  -2    3.15    0.69   5
  11  -2  -1   44.26    0.82   5
  12  -7 -11    1.62    0.54   5
  12  -7  -7   33.62    0.82   5
  12  -6  -5   42.63    0.88   5
  12  -1  -3   23.74    0.71   5
  13  -5  -8   17.63    0.61   5
  13  -2  -6    3.67    0.59   5
   9  -9  -9   29.03    0.72   5
   9  -6  -1    1.35    0.57   5
   9  -2   1  121.99    0.81   5
  10  -7  -3   16.13    0.69   5
  10   0   0   22.18    0.66   5
  11  -6  -3   13.37    0.72   5
  12  -7 -10   15.26    0.61   5
  12  -7  -8  164.19    1.04   5
  13  -5  -9    7.92    0.54   5
  13  -4  -7   15.64    0.64   5
   7  -2   2   48.78    0.48   5
   8  -9  -8  237.04    0.98   5
   8  -7  -2  196.06    0.91   5
   9   0   1    0.56    0.53   5
  11  -8  -9   14.24    0.76   5
  11  -8  -8   40.51    0.82   5
  13  -3  -7    8.67    0.62   5
   7  -4   1  939.77    1.42   5
   8  -8  -4    0.61    0.63   5
  11  -7  -5    4.39    0.71   5
  11  -4  -2   29.70    0.89   5
  12  -6  -6   84.01    0.95   5
  12   0  -4   62.37    0.77   5
  13  -4  -8   34.58    0.64   5
   8  -6  -1    4.96    0.59   5
   8  -5   0  632.10    1.28   5
  10  -8  -6    6.88    0.80   5
  12  -5  -5   12.56    0.80   5
  12  -4  -4   66.26    0.81   5
  12   1  -5   13.94    0.60   5
  13  -3  -8    4.46    0.57   5
   7  -1   2    9.21    0.38   5
   7   1   2  136.43    0.61   5
   9  -8  -5   29.73    0.77   5
   9  -7  -3   82.26    0.85   5
  10  -7  -4    0.98    0.76   5
  10  -4  -1    6.56    0.77   5
  11  -6  -4   52.58    0.92   5
  11  -5  -3   79.75    0.95   5
  11   0  -2   29.71    0.72   5
  12  -6  -7  118.47    0.96   5
  12  -1  -4   40.15    0.78   5
   7  -5   0  171.17    0.73   5
   7   0   2   81.10    0.52   5
  10  -8  -7   41.85    0.83   5
  11  -7  -6   11.56    0.75   5
  12  -2  -4  118.75    0.97   5
   8  -8  -5   45.15    0.71   5
   9  -6  -2   10.18    0.67   5
  10  -8 -11    2.37    0.65   5
  10  -5  -2  119.21    0.94   5
  11  -7 -12   -0.13    0.56   5
  11  -1  -2    6.65    0.73   5
  12  -6  -8   27.62    0.78   5
  12  -5  -6   13.33    0.78   5
  12  -4  -5   41.60    0.85   5
   7  -8  -5  136.53    0.76   5
   8  -2   1    4.73    0.49   5
   9  -8  -6   41.99    0.78   5
  10  -8 -10    4.82    0.70   5
  10  -8  -9    4.74    0.73   5
  11  -7  -7   97.01    1.01   5
  12  -6  -9   58.00    0.83   5
  12   0  -5   28.61    0.69   5
   6  -7  -3  241.37    0.77   5
   7  -3   1  259.95    0.81   5
  10  -7  -5   16.74    0.83   5
  11  -7 -11   13.63    0.70   5
  11  -4  -3   38.98    0.86   5
  11   1  -3   52.56    0.79   5
  12   1  -6   26.95    0.60   5
   6  -8  -6   17.09    0.45   5
   7  -7  -3   84.90    0.65   5
   8  -4   0  216.31    0.83   5
   9  -7  -4   11.48    0.74   5
  10  -2  -1   34.14    0.78   5
  10   0  -1   20.94    0.68   5
  11  -7 -10   95.76    0.89   5
  11  -7  -9    9.90    0.77   5
  12  -5  -7   24.48    0.80   5
  12  -3  -5   57.82    0.80   5
  12  -1  -5   39.92    0.77   5
   8  -8  -6   67.43    0.77   5
   8  -6  -2   14.94    0.59   5
   8  -1   1   43.95    0.56   5
   8   0   1    6.30    0.47   5
   9  -8  -7    4.94    0.73   5
   9  -2   0  456.66    1.23   5
   9   1   0    0.78    0.53   5
  10  -1  -1   68.01    0.82   5
  11  -3  -3   56.48    0.92   5
  12  -4  -6    9.05    0.79   5
   8  -5  -1   74.69    0.62   5
   9  -8 -11   37.83    0.74   5
   9  -8  -8   35.70    0.86   5
   9  -4  -1   31.42    0.71   5
   9   0   0  188.26    0.88   5
  10  -7 -13    5.24    0.55   5
  10  -6  -4   30.92    0.83   5
  10  -4  -2  110.24    0.92   5
  11  -6  -6   57.94    0.95   5
  11   0  -3  101.32    0.90   5
  12  -5 -11    2.88    0.60   5
  12  -5  -9    7.70    0.71   5
  12  -5  -8   31.19    0.71   5
  12   0  -6   44.89    0.72   5
  12   1  -7   17.16    0.62   5
   9  -8 -10   78.83    0.81   5
   9  -8  -9    2.93    0.70   5
  10  -5  -3  186.78    1.07   5
  11  -2  -3   15.81    0.83   5
  11  -1  -3   49.81    0.85   5
  12  -5 -10    3.89    0.59   5
  12  -4  -7   44.03    0.84   5
  12  -3  -6   40.78    0.87   5
   7  -6  -2    5.83    0.49   5
   7  -4   0   19.56    0.43   5
   9  -5  -2    4.29    0.66   5
  11  -5  -5   35.30    0.88   5
  11  -4  -4  285.78    1.25   5
  12  -1  -6   52.33    0.79   5
   7  -8  -7    3.23    0.57   5
   7  -5  -1  256.10    0.85   5
   8  -3   0  257.80    0.91   5
  10  -7 -12   17.63    0.70   5
  10  -3  -2    0.66    0.75   5
  11  -6 -12    4.64    0.63   5
  11  -6  -7    3.38    0.71   5
  11   1  -4    3.74    0.73   5
  12  -4  -8   46.21    0.82   5
  12   0  -7    4.37    0.65   5
   6  -7  -4  600.41    1.14   5
   7  -7  -4  320.07    0.98   5
   8  -8 -10   -0.46    0.70   5
   8  -8  -9   66.14    0.80   5
  10  -6  -5   31.49    0.84   5
  10   1  -2    4.05    0.72   5
  11  -6  -8  114.12    1.02   5
  12  -4 -11    0.46    0.59   5
  12  -4 -10   36.35    0.70   5
  12  -4  -9   17.97    0.73   5
  12  -3  -7    8.73    0.66   5
   7  -8  -8  271.64    0.99   5
   9  -3  -1  191.09    0.89   5
  10  -7 -11    5.19    0.69   5
  10  -7  -8   18.14    0.84   5
  10  -6 -14   28.16    0.60   5
  11  -6 -11   34.35    0.73   5
  11  -5  -6  304.83    1.29   5
  11  -3  -4   96.88    0.91   5
  11   2  -5    6.65    0.68   5
  12  -2  -7   13.75    0.76   5
   7  -1   1  158.04    0.66   5
   8  -6  -3   12.27    0.61   5
   9  -7  -6   86.82    0.90   5
  10  -7 -10    0.89    0.75   5
  10  -7  -9   31.56    0.83   5
  10  -5  -4   89.74    0.94   5
  10  -4  -3    4.05    0.75   5
  10   0  -2    7.41    0.69   5
  11   0  -4  144.04    0.99   5
  12  -3  -8    2.71    0.62   5
  12   0  -8   35.30    0.68   5
   8  -7  -5   85.32    0.78   5
   8  -4  -1   55.46    0.58   5
   9  -6  -4    7.47    0.64   5
  10  -1  -2   28.74    0.76   5
  11  -5 -13   30.31    0.63   5
  11  -1  -4    3.35    0.77   5
  12  -3 -11   24.16    0.59   5
  12  -3 -10   10.57    0.64   5
  12  -3  -9    2.98    0.67   5
  12  -2  -8    2.72    0.71   5
  12   0  -9   26.08    0.61   5
   7   0   1    7.64    0.38   5
   8  -5  -2   40.07    0.56   5
   9  -5  -3   64.21    0.77   5
   9  -4  -2   62.55    0.69   5
  10  -6  -6   20.06    0.82   5
  11  -5  -7   82.55    0.96   5
  11   3  -7   61.51    0.67   5
  12  -2  -9    2.78    0.66   5
  12  -1  -9    1.49    0.61   5
   7  -7  -5   23.10    0.57   5
   7  -6  -3  309.87    0.94   5
   7  -3   0   56.47    0.48   5
   9  -7 -12   68.97    0.85   5
   9  -7  -7   73.70    0.88   5
   9  -1  -1  392.82    1.16   5
  10  -6 -13    1.33    0.63   5
  10   2  -3    1.56    0.62   5
  11  -5 -12    6.92    0.64   5
  11   1  -5   86.39    0.84   5
  12  -1 -10    2.07    0.59   5
   6  -7  -5   28.69    0.48   5
   8   1   0   50.98    0.61   5
   9   0  -1  161.20    0.88   5
  10  -3  -3  198.10    1.02   5
  11  -5  -8  116.47    1.01   5
  11  -4  -6  110.41    0.93   5
  11   2  -6   45.34    0.73   5
   6  -6  -3  177.43    0.66   5
   8  -7  -6   53.75    0.73   5
   8   0   0  166.48    0.76   5
   9  -7 -11    0.24    0.77   5
   9  -6  -5    5.59    0.76   5
  10  -6  -7   16.37    0.77   5
  10  -5  -5   21.85    0.72   5
  10  -4  -4   78.03    0.91   5
  11  -5 -10   25.63    0.81   5
  11  -5  -9    3.10    0.78   5
  11  -2  -5    6.82    0.84   5
  11   0  -5    3.09    0.78   5
   8  -6  -4    7.82    0.61   5
   8  -3  -1  122.95    0.75   5
   9  -7 -10  242.59    1.12   5
   9  -7  -9   28.13    0.83   5
  10  -6 -12   15.92    0.72   5
  10   1  -3  370.10    1.22   5
  11  -4  -7   18.35    0.88   5
  11  -1  -5  142.01    0.97   5
   9  -6 -14    6.10    0.64   5
  10  -6 -11    1.61    0.75   5
  10  -5 -14   13.51    0.64   5
  10  -1  -3  165.44    1.02   5
  10   0  -3    1.41    0.74   5
  11  -3  -6  109.28    0.94   5
  11   1  -6   90.94    0.85   5
  11   2  -7    0.51    0.71   5
   6  -7  -6  391.24    1.01   5
   7  -7  -6  148.91    0.80   5
   8  -7  -7   24.52    0.72   5
   9  -5  -4   21.84    0.64   5
  10  -6 -10   39.73    0.89   5
  10  -5  -6    1.80    0.83   5
  11  -4 -12    4.19    0.66   5
  11  -4  -8    9.03    0.84   5
   8  -7 -12   83.02    0.82   5
   8  -4  -2   97.03    0.66   5
   9  -6  -6    3.31    0.78   5
   9   2  -2  138.21    0.87   5
  10  -3  -4   15.98    0.80   5
  10   2  -4   32.12    0.81   5
  11   0  -6   88.84    0.94   5
   8  -7 -11   64.49    0.83   5
   8  -7  -8  230.85    1.04   5
  10  -4  -5   63.08    0.82   5
  11  -4 -11    1.24    0.63   5
  11  -4 -10    9.25    0.80   5
  11  -4  -9    6.41    0.71   5
  11  -3 -13   21.66    0.62   5
  11  -3  -7   46.26    0.81   5
  11   2  -8   60.59    0.75   5
   7  -7  -7  516.47    1.24   5
   8  -7 -10  139.98    0.99   5
   8  -7  -9  168.31    0.98   5
   9  -6 -13    1.85    0.69   5
  10  -5 -13    8.57    0.70   5
  10  -5  -7  168.38    1.13   5
  10   3  -5  170.72    0.99   5
  11   1  -7   86.12    0.86   5
   6  -7  -7   25.01    0.56   5
   6  -6  -4  320.75    0.87   5
   7  -1   0  102.32    0.59   5
   9  -5 -15   43.50    0.64   5
   9  -5  -5    6.45    0.74   5
   9  -1  -2   55.95    0.76   5
   9   0  -2  127.84    0.87   5
   9   1  -2    3.57    0.62   5
  10  -2  -4   61.30    0.84   5
  10   1  -4    1.42    0.75   5
  11  -3 -12    5.72    0.68   5
  11  -3  -8  115.25    0.95   5
  11  -2  -7    9.58    0.74   5
  11   0  -7   42.83    0.85   5
  11   2  -9   15.55    0.65   5
   7  -7  -8   14.56    0.62   5
   7  -5  -3   86.02    0.63   5
   7  -3  -1  224.78    0.75   5
   8  -1  -1   24.89    0.57   5
   8   2  -1   39.99    0.61   5
   9  -3  -3  337.66    1.16   5
  10  -5 -12   35.18    0.79   5
  10  -5  -8   53.60    0.95   5
  10   0  -4   13.90    0.78   5
  11  -3 -11    2.12    0.73   5
  11  -3 -10   59.09    0.87   5
  11  -3  -9   16.74    0.84   5
  11  -2 -13   31.48    0.64   5
  11  -1  -7  130.74    0.97   5
  11   1  -8   14.12    0.72   5
  11   2 -10   44.57    0.66   5
   7   2   0  158.48    0.67   5
   8  -5  -4   53.77    0.70   5
   8  -3  -2  134.46    0.77   5
   9  -6 -12    1.35    0.71   5
   9  -6  -8    0.81    0.81   5
   9   3  -3  127.28    0.87   5
  10  -5  -9   42.24    0.94   5
  10  -4 -14   22.14    0.69   5
  10  -3  -5  204.09    1.06   5
  10   4  -7    0.30    0.66   5
  11  -2  -8   91.03    0.97   5
   6  -7  -8   22.87    0.52   5
   7  -7 -10    8.36    0.64   5
   7  -7  -9  544.52    1.30   5
   7  -6  -5  264.86    0.92   5
   7   0   0    1.91    0.39   5
   7   1   0  100.80    0.60   5
   8   0  -1  135.27    0.77   5
   8   1  -1  139.86    0.75   5
   9  -6 -11   24.08    0.84   5
   9  -6  -9    4.44    0.80   5
  10   2  -5    3.79    0.78   5
  11  -2 -12    3.13    0.63   5
  11  -2  -9   68.27    0.93   5
  11  -1  -8   99.34    1.00   5
  11   1  -9   46.33    0.75   5
   9  -6 -10   43.44    0.88   5
   9  -5 -14   10.74    0.76   5
   9  -5  -6  618.13    1.54   5
   9  -2  -3   95.64    0.87   5
  10  -4  -7    8.26    0.84   5
  10   3  -6   12.20    0.74   5
  11  -2 -11   32.98    0.76   5
  11  -2 -10   12.79    0.79   5
  11  -1 -12    0.83    0.58   5
  11  -1  -9   32.24    0.81   5
  11   0 -12    1.81    0.57   5
  11   0  -9   46.57    0.86   5
  10  -4 -13    5.95    0.71   5
  10  -3  -6   62.76    0.93   5
  10  -2  -5  126.00    0.94   5
  11  -1 -11    4.13    0.67   5
  11  -1 -10   31.86    0.79   5
  11   0 -11    1.18    0.64   5
  11   0 -10    7.39    0.72   5
   8  -6 -13   28.63    0.75   5
   8  -6  -7    8.10    0.70   5
   9   2  -3  116.51    0.86   5
  10  -4  -8   26.10    0.88   5
  10   1  -5  144.80    1.01   5
  10   4  -8   72.98    0.72   5
   7  -2  -1  101.30    0.57   5
   8  -2  -2  168.70    0.83   5
   9  -5  -7    3.79    0.81   5
   9  -4  -5  390.52    1.22   5
   9  -3  -4   94.76    0.80   5
  10   0  -5   33.95    0.77   5
   7  -6  -6   18.16    0.57   5
   7  -5  -4   42.04    0.58   5
   8  -6 -12   12.27    0.81   5
   8  -6  -8   55.60    0.81   5
   8  -5 -15    2.70    0.61   5
   8  -5  -5  106.12    0.76   5
   8   3  -2   11.12    0.60   5
   9  -5 -13   21.10    0.76   5
   9   0  -3  141.27    0.92   5
   9   1  -3   37.04    0.74   5
  10  -4 -11   45.71    0.93   5
  10  -4 -10   18.44    0.87   5
  10  -4  -9   65.00    0.95   5
  10   2  -6   28.46    0.79   5
  10   3  -7   28.52    0.70   5
  10   4  -9    3.84    0.62   5
   9   3  -4   60.96    0.81   5
  10  -3  -7  243.37    1.14   5
   7  -3  -2  237.17    0.78   5
   8  -6 -11  101.90    0.90   5
   8  -6 -10    8.78    0.76   5
   8  -6  -9  187.44    1.04   5
   9  -5 -12   20.06    0.84   5
   9  -5  -8  362.55    1.28   5
   9  -2  -4   19.95    0.76   5
  10  -3 -13   17.87    0.75   5
  10  -1  -6   33.97    0.92   5
  10   1  -6   10.34    0.79   5
   6  -6  -6   16.88    0.49   5
   7  -6  -7   34.87    0.65   5
   8  -4 -16   30.93    0.65   5
   9  -5 -11   30.34    0.86   5
   9  -5 -10  251.46    1.23   5
   9  -4  -6  253.21    1.08   5
   9   4  -5   15.65    0.70   5
  10  -3  -8   37.38    0.82   5
  10  -2 -14   -0.54    0.62   5
  10   3  -8    2.11    0.65   5
   8  -5 -14   18.25    0.80   5
   8  -5  -6   14.01    0.62   5
   8   2  -2  269.90    0.95   5
   9  -4 -14   78.72    0.85   5
   9  -3  -5   14.00    0.66   5
  10  -3 -12    0.67    0.77   5
  10  -3  -9  163.03    1.14   5
  10  -2  -7    6.56    0.74   5
  10   2  -7    6.76    0.77   5
   8   1  -2   52.02    0.65   5
   9   2  -4  242.55    1.05   5
  10  -3 -11    2.23    0.69   5
  10  -3 -10   14.94    0.86   5
  10  -2 -13    5.88    0.69   5
  10  -1 -14    9.49    0.60   5
  10  -1  -7  135.42    1.05   5
  10   3  -9   73.68    0.80   5
   7  -6 -12   57.30    0.75   5
   7  -6  -8  415.20    1.17   5
   7  -5  -5   60.29    0.59   5
   7   0  -1   76.47    0.57   5
   8  -2  -3  112.95    0.78   5
   9  -4  -7   24.56    0.73   5
   9  -3 -15   41.81    0.74   5
   9   1  -4    3.54    0.72   5
  10  -2  -8   19.21    0.87   5
  10   0 -14   -1.22    0.51   5
  10   1  -7   47.77    0.89   5
  10   2  -8   67.57    0.85   5
  10   3 -11    9.25    0.63   5
  10   3 -10    9.67    0.66   5
   6  -6  -7   37.90    0.53   5
   7  -6 -11  115.53    0.91   5
   7  -6  -9  167.22    0.90   5
   7   1  -1  167.97    0.69   5
   9  -4 -13    2.36    0.74   5
  10  -2 -12   27.35    0.82   5
  10  -2  -9   11.56    0.85   5
   7  -6 -10   39.46    0.72   5
   7  -2  -2  742.41    1.28   5
   8  -5 -13  143.91    0.96   5
   8  -3  -4    8.13    0.60   5
   9  -4  -8  107.75    1.00   5
   9  -3  -6   71.51    0.79   5
   9   3  -5   39.89    0.77   5
   9   4  -6   54.44    0.81   5
  10  -2 -11   48.43    0.91   5
  10  -1 -13    2.74    0.67   5
  10  -1  -8    8.65    0.85   5
  10   2  -9    0.56    0.75   5
   5  -6  -7    0.92    0.36   5
   7  -4  -4   51.83    0.59   5
   8  -4 -15   16.83    0.73   5
   9  -4 -12   10.68    0.83   5
   9  -4  -9   56.98    0.96   5
  10  -1 -12    5.94    0.74   5
  10  -1  -9  147.09    1.09   5
  10   0 -13   49.40    0.73   5
  10   0  -8   28.42    0.80   5
  10   1 -13    1.69    0.50   5
  10   2 -12   13.74    0.64   5
  10   2 -10   84.70    0.88   5
   6  -6  -8   37.94    0.56   5
   7  -3  -3  286.01    0.87   5
   8  -5 -12  149.84    1.05   5
   8  -1  -3   94.32    0.76   5
   8   3  -3    2.03    0.57   5
   9  -3 -14    3.49    0.71   5
   9  -1  -5   14.05    0.83   5
   9   2  -5   66.24    0.86   5
   9   5  -8   62.78    0.75   5
  10  -1 -11    2.03    0.79   5
  10  -1 -10   13.41    0.86   5
  10   0 -12    1.02    0.69   5
  10   0  -9   21.04    0.85   5
  10   1 -12   18.12    0.71   5
   6  -6 -11    3.62    0.63   5
   6  -6  -9   11.80    0.60   5
   6  -5  -5  528.76    1.07   5
   7  -5 -14   54.42    0.85   5
   8  -5 -11   32.78    0.85   5
   8  -5 -10  107.03    0.95   5
   8  -5  -9  246.57    1.13   5
   8  -4  -6   -1.34    0.67   5
   8  -3 -16   -0.11    0.61   5
   9  -3  -7    5.92    0.78   5
   9  -2 -15    4.54    0.65   5
  10   0 -11   82.33    0.93   5
  10   0 -10   38.83    0.88   5
  10   1 -11    2.69    0.75   5
  10   1 -10    5.99    0.79   5
   5  -6  -8   12.98    0.45   5
   6  -6 -10  189.91    0.90   5
   8   0  -3   45.76    0.68   5
   8   2  -3   34.06    0.64   5
   9  -2  -6    4.28    0.67   5
   9   1  -5  107.38    0.93   5
   9   3  -6   60.48    0.90   5
   9   4  -7   82.76    0.89   5
   9   5  -9   55.33    0.78   5
   7  -3 -17    0.61    0.58   5
   8  -4 -14   25.87    0.77   5
   8  -3  -5  231.55    0.99   5
   8  -2  -4  195.95    0.92   5
   8   4  -4   13.30    0.67   5
   9  -3  -8  226.74    1.16   5
   9   5 -10    4.78    0.66   5
   7  -5  -7  410.68    1.15   5
   9  -3 -12   18.74    0.90   5
   9  -1 -15   58.25    0.75   5
   9  -1  -6  260.93    1.17   5
   9   5 -11    0.93    0.57   5
   7  -5 -13   53.74    0.79   5
   7  -4  -5   42.38    0.60   5
   8  -4  -7  132.88    0.87   5
   9  -3 -11    2.23    0.88   5
   9  -3 -10   55.73    0.94   5
   9  -3  -9   13.78    0.86   5
   9  -2  -7   13.94    0.81   5
   9   2  -6   39.27    0.88   5
   9   4  -8   35.72    0.83   5
   6  -5  -6  682.70    1.24   5
   6  -4  -4  673.74    1.14   5
   7  -5  -8   10.22    0.65   5
   7  -2  -3  897.27    1.43   5
   7   3  -2    8.43    0.49   5
   8  -4 -13   35.79    0.89   5
   8  -3 -15   52.09    0.81   5
   9   0 -15    4.70    0.62   5
   9   0  -6    3.56    0.83   5
   9   1  -6   52.50    0.90   5
   9   3  -7   34.49    0.91   5
   7  -4 -15   72.32    0.84   5
   7  -3  -4   18.21    0.47   5
   8  -4  -8   87.99    0.94   5
   8  -2 -16   74.27    0.81   5
   8  -1  -4   44.10    0.65   5
   8   3  -4    9.99    0.66   5
   9  -2 -13    6.90    0.82   5
   9  -2  -8   11.28    0.84   5
   9  -1 -14    3.19    0.72   5
   9   1 -15    9.55    0.59   5
   7  -5 -11   92.48    0.87   5
   7  -5  -9   85.73    0.85   5
   7   2  -2   23.05    0.51   5
   8  -4 -12    7.78    0.82   5
   8  -3  -6  224.21    0.97   5
   8  -2  -5   99.61    0.81   5
   9  -1  -7    4.72    0.72   5
   9   4 -12    6.76    0.62   5
   9   4  -9   16.34    0.73   5
   7  -5 -10    6.00    0.72   5
   7  -4  -6  227.68    0.92   5
   8  -4 -11  224.80    1.18   5
   9  -2 -12   18.73    0.75   5
   9  -2  -9    3.37    0.84   5
   9   0 -14    8.03    0.68   5
   9   0  -7   17.06    0.88   5
   9   2  -7    4.33    0.81   5
   9   3  -8   86.49    0.94   5
   9   4 -11    3.62    0.68   5
   9   4 -10   41.91    0.80   5
   6  -5 -13   18.39    0.74   5
   7  -3 -16    8.10    0.71   5
   7  -2 -17    5.65    0.65   5
   8  -3 -14    0.74    0.76   5
   8   1  -4   49.04    0.73   5
   8   4  -5   42.92    0.76   5
   8   5  -6    2.54    0.72   5
   9  -2 -11   17.31    0.78   5
   9  -2 -10   13.04    0.77   5
   9  -1 -13   60.21    0.92   5
   9  -1  -8   67.66    0.97   5
   9   1 -14    5.89    0.66   5
   9   2 -14    3.52    0.52   5
   9   3 -13    1.09    0.62   5
   7  -4 -14   39.77    0.83   5
   7  -1  -3  451.35    1.07   5
   8  -3  -7  720.51    1.58   5
   8  -2 -15    4.20    0.72   5
   8  -1 -16    6.88    0.64   5
   8   6  -8    9.87    0.74   5
   9   3  -9   24.85    0.83   5
   6  -4  -5  316.42    0.87   5
   7   4  -3   41.60    0.61   5
   8  -3 -13    8.88    0.84   5
   8  -1  -5  105.44    0.85   5
   9  -1 -12   28.35    0.79   5
   9  -1  -9    8.67    0.76   5
   9   0 -13    3.30    0.77   5
   9   0  -8    1.87    0.83   5
   9   1  -8   42.98    0.95   5
   9   2 -13   19.19    0.72   5
   9   3 -10   35.88    0.83   5
   6  -5 -12   10.52    0.65   5
   6  -5  -8   56.18    0.64   5
   6  -4 -15   43.13    0.83   5
   7  -4  -7  639.98    1.39   5
   7  -3  -5  480.59    1.13   5
   7  -2  -4    7.45    0.54   5
   8  -3  -8   36.50    0.82   5
   8  -2  -6   90.38    0.77   5
   8   3  -5   19.56    0.71   5
   9  -1 -10   65.45    0.89   5
   9   0  -9   16.60    0.89   5
   9   1 -13   82.67    0.81   5
   6  -5  -9   66.32    0.68   5
   7  -4 -13    3.09    0.80   5
   8   0  -5   39.88    0.77   5
   8   5  -7   20.42    0.81   5
   8   6  -9   34.71    0.73   5
   9   0 -12    0.21    0.70   5
   9   0 -11   43.18    0.92   5
   9   0 -10   52.15    0.95   5
   9   1 -12    6.26    0.82   5
   9   1  -9    5.38    0.93   5
   9   2 -12    6.11    0.68   5
   9   2 -11    4.32    0.81   5
   9   2 -10   33.78    0.93   5
   5  -5  -7   38.51    0.46   5
   6  -5 -10    2.68    0.59   5
   6  -3  -4  128.58    0.63   5
   7  -3 -15   10.28    0.75   5
   7   3  -3    2.08    0.52   5
   8  -3  -9  560.59    1.53   5
   8   1 -16   41.53    0.69   5
   8   1  -5  144.94    0.93   5
   8   2  -5    5.35    0.75   5
   8   4  -6   42.38    0.79   5
   8   6 -12    1.82    0.56   5
   8   6 -11    3.13    0.68   5
   8   6 -10    6.81    0.68   5
   9   1 -11    7.25    0.84   5
   9   1 -10  162.43    1.11   5
   7  -4 -12   40.28    0.85   5
   7  -2 -16    3.92    0.76   5
   7  -1 -17   10.09    0.65   5
   7   1  -3   32.81    0.57   5
   7   2  -3  100.79    0.73   5
   8  -3 -10  268.36    1.17   5
   8  -2  -7    7.66    0.73   5
   8  -1  -6   57.93    0.80   5
   6  -3 -16   22.52    0.81   5
   7  -4 -11   83.93    0.89   5
   7  -4  -9   97.50    0.87   5
   5  -5  -8   20.83    0.45   5
   6  -4 -14   45.22    0.76   5
   6  -1 -18    4.44    0.60   5
   7  -4 -10   86.23    0.88   5
   7  -1  -4  300.53    0.95   5
   8   0 -15    4.84    0.76   5
   8   3  -6    3.73    0.76   5
   8   5  -8   33.68    0.78   5
   6  -2 -17    7.45    0.70   5
   7  -3 -14   42.99    0.87   5
   7  -2  -5  105.07    0.71   5
   8  -2 -12   22.64    0.92   5
   8  -1 -14    1.95    0.86   5
   8   0  -6    6.28    0.75   5
   8   3 -15   52.40    0.68   5
   8   4  -7   14.25    0.82   5
   8   5 -13    9.01    0.63   5
   5  -5 -10   10.02    0.56   5
   5  -5  -9   11.75    0.47   5
   7   0 -17   11.14    0.65   5
   8  -2 -11   60.66    0.95   5
   8  -2  -9   28.01    0.85   5
   8  -1  -7  130.14    0.88   5
   8   1 -15   79.37    0.83   5
   8   2 -15    6.85    0.66   5
   8   2  -6    1.77    0.76   5
   8   4 -14   48.58    0.72   5
   8   5 -12    1.32    0.67   5
   8   5  -9    4.01    0.73   5
   6  -4 -13   23.98    0.84   5
   6  -4  -7   86.36    0.66   5
   6   3  -2  151.55    0.67   5
   7  -3  -7  345.65    1.07   5
   7  -2 -15   49.22    0.87   5
   7   0  -4  172.40    0.82   5
   8  -2 -10   29.53    0.79   5
   8   5 -11    1.50    0.74   5
   8   5 -10   23.17    0.80   5
   6  -3  -5   95.17    0.57   5
   6   2  -2  104.96    0.57   5
   7  -3 -13    7.20    0.82   5
   7  -1 -16    8.65    0.71   5
   7   5  -5   74.67    0.80   5
   7   7  -8   17.54    0.75   5
   8  -1 -13   74.91    0.89   5
   8  -1  -8   15.51    0.82   5
   8   0 -14    9.82    0.71   5
   8   0  -7    6.87    0.79   5
   8   3 -14    0.21    0.66   5
   8   3  -7    8.24    0.79   5
   8   4  -8   33.47    0.88   5
   6  -3 -15   23.83    0.78   5
   6  -2  -4 1126.74    1.48   5
   6   0 -18    4.52    0.63   5
   7  -3  -8    6.16    0.72   5
   7  -2  -6   34.27    0.65   5
   7   3  -4  174.11    0.86   5
   8  -1 -12  116.57    1.07   5
   8   1 -14    3.51    0.80   5
   8   2 -14   27.42    0.79   5
   8   4 -13    8.34    0.67   5
   4  -5  -9    0.14    0.40   5
   5  -4 -14    5.43    0.76   5
   6  -4 -12  151.39    0.96   5
   6  -4  -8   43.48    0.62   5
   7  -3 -12   81.25    0.96   5
   7  -1  -5   34.05    0.56   5
   7   2  -4    6.62    0.59   5
   8  -1 -11   17.13    0.92   5
   8  -1 -10   58.20    0.95   5
   8  -1  -9  150.90    0.99   5
   8   0 -13   40.63    0.95   5
   8   4  -9   20.89    0.84   5
   6  -4  -9    0.36    0.61   5
   6  -2 -16    5.76    0.81   5
   7  -3  -9  163.06    0.93   5
   7  -2 -14   12.33    0.88   5
   7   7 -12   52.08    0.75   5
   7   7  -9   99.00    0.86   5
   8   0  -8   81.44    0.86   5
   8   3 -13    1.98    0.77   5
   6  -4 -10  438.87    1.24   5
   6  -1 -17   24.48    0.74   5
   7  -1 -15   26.39    0.85   5
   7   4  -5   36.86    0.76   5
   7   6  -7    1.37    0.74   5
   7   7 -11   57.27    0.83   5
   7   7 -10    5.79    0.70   5
   8   0 -12   10.45    0.89   5
   8   0  -9  178.52    1.14   5
   8   1 -13   67.22    0.86   5
   8   2 -13   79.18    0.95   5
   8   3 -12   11.81    0.85   5
   5  -2 -17    6.87    0.66   5
   5  -1 -18    1.55    0.60   5
   6  -3 -14   12.91    0.79   5
   6  -3  -6  497.52    1.09   5
   6   0  -3    5.63    0.42   5
   6   1 -18    4.45    0.61   5
   7  -2  -7   57.43    0.73   5
   7   0  -5   54.09    0.70   5
   7   5  -6    0.93    0.77   5
   7   6 -14   11.63    0.61   5
   8   0 -11   29.48    0.93   5
   8   0 -10    5.13    0.87   5
   8   1 -12   38.39    0.93   5
   8   3 -11    8.72    0.89   5
   5  -4 -13  260.49    1.08   5
   5  -4  -7   51.90    0.51   5
   7  -1  -6  231.97    0.95   5
   7   1 -16    1.16    0.75   5
   7   3 -16   13.80    0.64   5
   7   5 -15    8.98    0.64   5
   8   1 -11    4.57    0.91   5
   8   1  -9    3.58    0.75   5
   8   2 -12    7.34    0.75   5
   8   2 -11   34.61    0.92   5
   8   2 -10   51.26    0.95   5
   8   2  -9   83.72    0.94   5
   6   4  -3   58.16    0.56   5
   7  -2  -8  352.07    1.18   5
   7   2 -16  117.96    0.91   5
   7   3  -5    9.55    0.66   5
   7   6  -8   64.69    0.91   5
   5  -3 -15   23.43    0.79   5
   6  -3 -13   71.43    0.99   5
   6  -3  -7   18.41    0.57   5
   6  -2 -15   52.71    0.96   5
   6  -2  -5    8.58    0.40   5
   6  -1  -4  163.34    0.66   5
   6   0 -17    2.77    0.71   5
   7   0 -15   12.36    0.87   5
   7   2  -5   22.85    0.67   5
   7   6 -13    7.98    0.71   5
   5  -4 -12    4.12    0.65   5
   5  -4  -8   57.24    0.56   5
   6  -1 -16   45.38    0.88   5
   6   2  -3   35.31    0.50   5
   6   3  -3  442.23    1.02   5
   7  -2 -11  198.73    1.16   5
   7  -2 -10 1009.76    1.93   5
   7  -2  -9   16.75    0.70   5
   7   4 -15   19.85    0.70   5
   7   6  -9    2.41    0.84   5
   7  -1  -7   27.61    0.64   5
   7   1 -15    9.51    0.86   5
   7   5 -14    9.93    0.73   5
   7   5  -7   10.65    0.75   5
   7   6 -12   25.91    0.80   5
   7   6 -11   -0.45    0.84   5
   7   6 -10  141.97    1.07   5
   5  -4 -11   21.97    0.64   5
   5  -4 -10   16.87    0.57   5
   5  -4  -9    4.90    0.50   5
   5  -2 -16    9.11    0.81   5
   5   0 -18   38.51    0.74   5
   6  -3 -12    6.33    0.79   5
   6   1 -17    9.04    0.73   5
   6   5  -4   34.91    0.64   5
   6   8 -13    0.15    0.64   5
   7  -1 -13  135.26    1.05   5
   7   0 -14   29.30    0.98   5
   7   2 -15    1.42    0.81   5
   7   3 -15   23.28    0.79   5
   5  -1 -17   17.13    0.85   5
   6  -3 -11   47.76    0.82   5
   6  -2 -14   18.57    0.88   5
   6  -2  -6  400.06    1.04   5
   6   0  -4  493.89    1.07   5
   7  -1  -8  292.29    1.16   5
   7   1  -6   82.01    0.75   5
   7   3  -6    5.89    0.71   5
   7   5  -8   73.44    0.94   5
   5  -3 -14   26.44    0.79   5
   6   2 -17    2.06    0.72   5
   6   4 -17   11.08    0.61   5
   6   6  -5   77.25    0.72   5
   6   8 -12   56.63    0.81   5
   6   8  -9   35.66    0.82   5
   7  -1 -12   20.27    0.82   5
   7   0  -7   81.97    0.84   5
   7   1 -14    8.27    0.87   5
   7   4 -14   86.44    0.83   5
   7   4  -7    8.85    0.79   5
   6  -1 -15    8.28    0.84   5
   6  -1  -5  150.93    0.68   5
   6   0 -16    1.23    0.80   5
   6   3 -17   18.84    0.69   5
   6   8 -11  132.76    0.96   5
   6   8 -10  163.78    1.01   5
   7  -1 -11  277.75    1.20   5
   7  -1 -10   14.02    0.82   5
   7  -1  -9   82.92    0.82   5
   7   0 -13   35.34    0.94   5
   7   2 -14  154.87    1.10   5
   7   3 -14   22.27    0.86   5
   4  -4 -12  200.56    0.89   5
   5   1 -18    4.92    0.69   5
   6   4  -4  162.21    0.79   5
   7   1  -7   86.07    0.89   5
   7   3  -7  239.80    1.13   5
   7   4 -13    5.35    0.87   5
   7   5 -11   45.86    0.91   5
   7   5 -10    1.43    0.85   5
   6  -2 -13    3.66    0.83   5
   6  -2  -7  149.87    0.79   5
   6   5 -16    7.99    0.61   5
   6   7 -14   10.49    0.65   5
   6   7  -7   32.68    0.73   5
   7   0 -12  210.80    1.22   5
   7   1 -13  137.43    1.14   5
   7   4  -8   35.51    0.87   5
   4  -4 -11    5.01    0.54   5
   5  -3 -13   22.94    0.75   5
   5  -2 -15   61.11    0.88   5
   5   2 -18   65.14    0.82   5
   6   6 -15    5.99    0.65   5
   7   0 -11    4.94    0.88   5
   7   0 -10  293.71    1.26   5
   7   0  -9  163.00    1.04   5
   7   2 -13   24.01    0.93   5
   7   3 -13  101.67    0.95   5
   7   4 -12  100.16    1.04   5
   7   4  -9  144.59    1.10   5
   4  -4 -10   72.16    0.57   5
   4  -4  -9   73.46    0.53   5
   5  -1 -16   51.58    0.94   5
   5   0 -17   27.23    0.79   5
   6  -2 -12   64.18    0.90   5
   6  -2  -8  295.68    1.03   5
   6  -1 -14  130.69    1.09   5
   6   0  -5    3.68    0.49   5
   6   4 -16    3.02    0.68   5
   6   6  -6   52.69    0.73   5
   6   7 -13  103.55    0.88   5
   7   1 -12   67.70    1.00   5
   7   1  -8    2.00    0.66   5
   7   2  -8  498.37    1.46   5
   7   3 -12   -0.43    0.86   5
   7   4 -11   -0.60    0.91   5
   4   0 -18   10.62    0.69   5
   5  -3 -12   36.48    0.73   5
   6  -1  -6    2.40    0.41   5
   6   2 -16    5.20    0.69   5
   6   3 -16    4.35    0.74   5
   6   7  -8   35.53    0.78   5
   7   1 -11   33.49    0.94   5
   7   1 -10   46.40    0.91   5
   7   1  -9  414.40    1.38   5
   7   2 -12   43.85    0.95   5
   7   3  -9  493.84    1.57   5
   4  -3 -14  167.01    0.92   5
   4  -1 -17    0.72    0.78   5
   5  -3  -8    7.54    0.46   5
   5   9 -13   57.40    0.74   5
   6  -2  -9   21.23    0.61   5
   6   5 -15   45.56    0.79   5
   6   7 -12   -0.26    0.72   5
   7   2 -11   45.95    0.94   5
   7   2 -10  317.32    1.35   5
   7   2  -9  145.98    0.98   5
   7   3 -11    5.31    0.76   5
   7   3 -10   10.27    0.90   5
   5  -3 -11   16.32    0.68   5
   5  -2 -14    4.61    0.88   5
   5   5  -3 1300.20    1.59   5
   6   1 -15   45.09    0.95   5
   6   4  -5    8.40    0.59   5
   6   7 -11  172.93    1.05   5
   6   7 -10   18.56    0.87   5
   6   7  -9   36.86    0.82   5
   5  -3 -10   87.28    0.74   5
   5  -3  -9   15.22    0.55   5
   5   1 -17    8.89    0.78   5
   5   9 -12  128.56    0.90   5
   6  -1  -7   20.66    0.52   5
   6   0 -14  100.38    1.10   5
   6   6  -7    5.28    0.75   5
   6  -1 -12   33.53    0.93   5
   6   0  -6  393.94    1.07   5
   6   2 -15    1.30    0.85   5
   6   3 -15   62.36    0.93   5
   6   3  -5   25.31    0.61   5
   6   4 -15    2.16    0.68   5
   6   5  -6   70.36    0.76   5
   4  -3 -13  147.36    0.86   5
   4   1 -18   34.97    0.75   5
   5  -1 -15    3.22    0.83   5
   5   0 -16   60.09    0.93   5
   5   5 -17    9.96    0.62   5
   5   9 -11   33.62    0.74   5
   5   9 -10   73.37    0.81   5
   6  -1  -8   41.74    0.71   5
   6   5 -14  111.97    1.00   5
   4  -2 -15  148.37    0.95   5
   5  -2 -13   61.61    0.91   5
   5   3 -17   -0.04    0.73   5
   5   4 -17    4.58    0.68   5
   5   4  -3    2.53    0.38   5
   5   6  -4  272.63    0.88   5
   5   8 -14    1.84    0.69   5
   6  -1 -11  461.36    1.42   5
   6  -1  -9   69.18    0.80   5
   6   0 -13   26.35    0.95   5
   6   1 -14    4.83    0.90   5
   6   6 -12  170.70    1.11   5
   3   0 -18    4.82    0.72   5
   4   0 -17   37.16    0.87   5
   5   6 -16    0.51    0.63   5
   6  -1 -10   15.14    0.68   5
   6   0  -7    9.73    0.58   5
   6   1  -6   16.05    0.59   5
   6   4 -14   28.88    0.92   5
   6   4  -6  189.16    0.95   5
   6   5  -7   15.03    0.75   5
   6   6 -11   36.16    0.90   5
   6   6  -9  187.24    1.11   5
   4  -3 -12  101.56    0.82   5
   5  -2  -7  311.51    0.90   5
   5   7 -15   74.07    0.85   5
   6   2 -14   22.15    0.82   5
   6   3 -14    5.35    0.90   5
   6   3  -6   41.38    0.69   5
   6   6 -10  223.17    1.18   5
   3   2 -19   47.24    0.74   5
   4  10 -13   15.64    0.65   5
   5  -2 -12   16.11    0.75   5
   5  -1 -14   16.29    0.87   5
   5   8 -13   57.57    0.86   5
   6   0 -12  761.70    1.73   5
   6   0  -8   46.99    0.74   5
   6   1 -13  478.67    1.58   5
   4   3 -18    9.55    0.72   5
   4   5 -18   54.06    0.73   5
   5  -2 -11    6.26    0.69   5
   5  -2  -8   19.05    0.55   5
   5   0 -15    3.88    0.88   5
   5   5 -16   22.92    0.79   5
   6   0 -11   93.12    0.99   5
   6   1  -7   30.38    0.70   5
   6   4 -13    2.56    0.92   5
   6   4  -7   80.94    0.86   5
   6   5 -12   -1.58    0.91   5
   6   5  -8   71.66    0.90   5
   4  -3 -11    3.89    0.54   5
   4  -2 -14   15.52    0.76   5
   4   4 -18    1.54    0.66   5
   5  -2 -10    3.92    0.63   5
   5   2 -16    0.04    0.87   5
   5   5  -4   17.67    0.49   5
   5   7  -6   63.61    0.78   5
   5   8 -12    2.89    0.75   5
   5   8  -8    3.55    0.70   5
   6   0 -10  462.57    1.34   5
   6   0  -9    2.45    0.62   5
   6   1 -12   13.06    0.89   5
   6   2 -13    3.68    0.80   5
   6   3 -13  110.02    1.09   5
   6   5  -9  183.41    1.12   5
   3   3 -19    9.52    0.65   5
   4  -3 -10    9.77    0.49   5
   4  -3  -9    0.64    0.42   5
   4   1 -17   30.92    0.85   5
   5  -1 -13  129.89    1.03   5
   5  -1  -6   89.55    0.59   5
   5   3 -16    6.45    0.82   5
   5   4 -16    7.40    0.70   5
   5   6 -15    4.26    0.76   5
   5   8  -9    8.10    0.84   5
   6   1  -8  206.46    0.99   5
   6   2  -7    4.88    0.59   5
   3  -2 -15  121.57    0.89   5
   3   1 -18   66.03    0.93   5
   4  10 -11   18.03    0.74   5
   5   6  -5   32.73    0.60   5
   5   8 -11   71.50    0.88   5
   5   8 -10   53.73    0.87   5
   6   1 -11   11.45    0.74   5
   6   1  -9  270.83    1.14   5
   6   2 -12  226.52    1.16   5
   6   4 -11   11.40    0.91   5
   6   4  -8  129.75    0.92   5
   4  -1 -15  166.44    1.07   5
   4   0 -16   77.14    0.98   5
   5   4  -4  434.46    1.01   5
   6   1 -10  150.69    0.96   5
   6   2  -8  258.05    1.05   5
   6   3 -11   50.41    0.97   5
   6   3  -8  275.19    1.12   5
   6   4 -10  259.16    1.28   5
   4  -2 -13   26.39    0.73   5
   4   2 -17   51.86    0.90   5
   4   6 -17   19.09    0.62   5
   4   9 -14   57.37    0.80   5
   5   7  -7  165.36    1.02   5
   6   2 -10  320.13    1.29   5
   6   2  -9  597.19    1.48   5
   6   3 -10   42.54    0.94   5
   2   2 -19  101.03    0.84   5
   3  -3 -12    5.18    0.50   5
   5  -1  -7  280.31    0.85   5
   5   2 -15    4.81    0.82   5
   5   3 -15   53.35    0.98   5
   5   4 -15    2.98    0.87   5
   5   6 -14   25.75    0.90   5
   3   2 -18   40.98    0.88   5
   4   5 -17    6.60    0.64   5
   4   7 -16    1.88    0.69   5
   5  -1  -8  300.27    0.96   5
   5   5  -5  337.87    1.01   5
   5   6  -6  350.30    1.16   5
   5   7 -12   99.12    1.04   5
   3  -3 -11  110.01    0.67   5
   3  -2 -14  109.08    0.87   5
   4  -2 -12   86.38    0.81   5
   4  -1 -14  339.58    1.28   5
   4   9 -13    1.07    0.76   5
   5  -1 -10   13.11    0.70   5
   5  -1  -9  283.96    1.00   5
   5   0  -6   23.07    0.49   5
   5   1  -5 1096.65    1.46   5
   5   7 -11   29.94    0.89   5
   5   7  -8   19.93    0.76   5
   3   6 -18   12.22    0.64   5
   3  11 -12   10.31    0.61   5
   5   6 -13   43.68    0.96   5
   5   7 -10   90.08    1.01   5
   5   7  -9   27.81    0.88   5
   2   3 -19   53.83    0.72   5
   3   3 -18    7.81    0.74   5
   4  -2 -11    8.18    0.59   5
   4   6 -16    0.41    0.75   5
   4   9 -12   26.61    0.86   5
   5   0 -12  381.75    1.34   5
   5   2 -14    5.08    0.79   5
   5   3 -14    8.24    0.90   5
   5   4 -14    8.22    0.92   5
   2   1 -18    2.60    0.70   5
   3   1 -17  147.54    1.03   5
   3   5 -18    0.32    0.70   5
   4   9  -8   66.46    0.85   5
   5   0  -7   89.45    0.63   5
   5   1 -13   40.15    0.93   5
   5   3  -5 1214.30    1.61   5
   5   5  -6   42.74    0.73   5
   5   6  -7    6.57    0.67   5
   2   4 -19    2.81    0.65   5
   3   0 -16   63.53    0.95   5
   3  10 -14   14.60    0.67   5
   4  -2 -10  165.08    0.79   5
   4  -2  -9   16.57    0.49   5
   4  -2  -8    5.28    0.41   5
   4  -1 -13  182.85    1.03   5
   4   5 -16   54.86    0.89   5
   4   7 -15    3.53    0.77   5
   4   9 -11    6.05    0.75   5
   5   1  -6  624.24    1.20   5
   5   5 -13   76.51    1.01   5
   1   2 -19    0.86    0.65   5
   3  -2 -13    9.05    0.67   5
   3   7 -17   48.71    0.73   5
   4   3 -16   32.89    0.93   5
   4   4 -16    2.83    0.85   5
   4   9 -10   22.33    0.79   5
   5   0 -10    3.43    0.70   5
   5   0  -9  293.41    1.03   5
   5   1 -12   88.22    0.95   5
   5   4 -13   10.22    0.90   5
   5   6  -8   43.46    0.83   5
   4   0 -14  200.36    1.13   5
   4   1 -15   20.68    0.92   5
   4   8 -13   63.79    0.90   5
   4   8  -6  234.41    0.95   5
   5   2  -6  541.35    1.16   5
   5   3 -13  205.43    1.13   5
   5   4  -6  373.56    1.06   5
   5   5 -12    8.90    0.90   5
   5   5  -7  281.39    1.07   5
   5   6 -10  116.49    1.04   5
   5   6  -9  139.01    1.01   5
   3   2 -17    1.67    0.78   5
   3   8 -16   12.03    0.70   5
   4   6 -15   28.29    0.88   5
   5   1 -11   87.80    0.90   5
   5   1  -7  851.19    1.41   5
   3   6 -17   41.79    0.81   5
   3  10 -13    4.10    0.70   5
   4  -1 -12   50.69    0.76   5
   4   6  -4  104.89    0.62   5
   4   7 -14  135.95    1.06   5
   4   7  -5  791.19    1.40   5
   5   1  -8    5.29    0.57   5
   5   2 -12    9.01    0.73   5
   5   3 -12   36.08    0.90   5
   5   4 -12   55.77    0.95   5
   5   5 -11  176.55    1.15   5
   5   5  -8  155.78    0.97   5
   1   3 -19   96.14    0.85   5
   3  -2 -12   52.30    0.64   5
   3  -1 -14  106.08    0.93   5
   4   2 -15   17.97    0.82   5
   4   5 -15   30.43    0.89   5
   4   8 -12    1.46    0.83   5
   4   8  -7   44.16    0.77   5
   5   1 -10   26.93    0.65   5
   5   1  -9   75.09    0.75   5
   5   2  -7   44.94    0.62   5
   2   7 -18    2.87    0.58   5
   2  11 -14   63.24    0.69   5
   3  10 -12    3.41    0.74   5
   4  -1 -11   90.43    0.76   5
   4   0 -13   15.01    0.79   5
   4   3 -15    2.86    0.89   5
   5   2 -11   29.42    0.73   5
   5   3 -11   56.72    0.91   5
   5   3  -7  346.97    1.03   5
   5   4 -11   16.50    0.75   5
   2  -1 -15  323.25    1.15   5
   2   1 -17   62.96    0.85   5
   2   3 -18    1.02    0.76   5
   3   0 -15   50.00    0.88   5
   3   9 -14    2.72    0.72   5
   4   6 -14   22.26    0.88   5
   4   7 -13   -1.67    0.89   5
   4   8 -11    6.51    0.82   5
   4   8  -8  175.90    0.99   5
   5   2 -10   37.31    0.69   5
   5   2  -9   57.58    0.77   5
   5   2  -8    5.77    0.53   5
   5   3 -10   11.93    0.76   5
   5   3  -8   98.75    0.82   5
   5   4 -10  167.45    1.07   5
   5   4  -9  152.31    1.02   5
   1   4 -19   37.44    0.72   5
   2   0 -16   84.95    0.92   5
   2   6 -18  144.74    0.94   5
   3  -2 -11  224.79    0.82   5
   3   8 -15   35.19    0.83   5
   3  10 -11    6.17    0.80   5
   4  -1  -8   86.07    0.57   5
   4   8 -10    1.12    0.82   5
   4   8  -9   10.38    0.79   5
   5   3  -9   10.65    0.64   5
   1   5 -19    1.70    0.64   5
   2  -2 -13   78.17    0.70   5
   2   8 -17    1.52    0.60   5
   4   2 -14   64.75    1.03   5
   4   5  -4  242.02    0.74   5
   4   7  -6  303.00    1.02   5
   2  10 -15    6.39    0.66   5
   2  11 -13   10.35    0.65   5
   3  -2 -10   25.89    0.51   5
   3  -1 -13  219.08    0.99   5
   3   6 -16   26.22    0.83   5
   3  10 -10    2.73    0.69   5
   3  10  -9   80.89    0.84   5
   4   5 -14  208.96    1.13   5
   1   2 -18   63.93    0.84   5
   2   9 -16   22.71    0.69   5
   3   9 -13    3.64    0.79   5
   4   3 -14  336.06    1.31   5
   4   4 -14    1.87    0.77   5
   4   6 -13   71.04    0.98   5
   0   3 -19   -0.02    0.60   5
   2   2 -17   35.28    0.85   5
   3   0 -14   53.56    0.88   5
   3   1 -15  138.02    1.03   5
   3   4 -16   17.90    0.88   5
   4   0 -11  122.62    0.88   5
   4   7 -11   17.61    0.91   5
   4   7  -7  398.43    1.17   5
   2   7 -17   38.17    0.76   5
   2  11 -12   70.33    0.88   5
   3   7 -15   54.58    0.81   5
   3   8 -14    2.39    0.86   5
   4   2 -13  276.75    1.22   5
   4   5 -13   15.32    0.91   5
   4   7 -10   11.50    0.82   5
   4   7  -8   27.31    0.75   5
   1   1 -17   26.05    0.80   5
   2  -2 -12   15.52    0.48   5
   2  -1 -14  193.31    0.94   5
   2  10 -14   35.24    0.83   5
   3  -1 -12    7.37    0.60   5
   3   9 -12   13.52    0.84   5
   4   0 -10   28.44    0.62   5
   4   1 -12  188.33    0.98   5
   4   3 -13    3.26    0.83   5
   4   5  -5  285.39    0.85   5
   4   6 -12    2.10    0.88   5
   0   4 -19   17.70    0.66   5
   1   3 -18    4.00    0.71   5
   1  11 -15   22.23    0.63   5
   1  12 -13    7.12    0.64   5
   2   0 -15    4.87    0.79   5
   2   1 -16   11.94    0.80   5
   2   6 -17    2.75    0.76   5
   4   0  -8   12.74    0.42   5
   1   0 -16   47.16    0.76   5
   1   7 -18    3.06    0.65   5
   1   9 -17   53.80    0.69   5
   2   8 -16  131.37    0.88   5
   2   9 -15   54.36    0.85   5
   2  11 -11   29.69    0.77   5
   3   6 -15   20.56    0.77   5
   3   9 -11   32.49    0.85   5
   3   9  -7   43.76    0.74   5
   4   2 -12   22.38    0.81   5
   4   4  -5   60.53    0.52   5
   4   5 -12   14.82    0.89   5
   4   6 -11  104.76    1.03   5
   0   2 -18    0.53    0.70   5
   0   5 -19    7.00    0.65   5
   0   6 -19    9.07    0.60   5
   1   6 -18  110.61    0.90   5
   1  10 -16   33.54    0.70   5
   2  11 -10    7.87    0.75   5
   3  -1 -11  237.44    0.88   5
   3   0 -13    4.80    0.69   5
   3   3 -15  129.06    1.12   5
   3   5 -15  203.72    1.19   5
   3   7 -14   29.72    0.90   5
   4   4 -12    1.89    0.81   5
   2  -2 -11  201.55    0.71   5
   3   4 -15  162.56    1.13   5
   3   9 -10   11.69    0.79   5
   3   9  -8    6.60    0.69   5
   4   1 -10  144.54    0.83   5
   4   1  -7 2582.46    2.19   5
   4   3 -12   48.52    0.77   5
   4   5  -6  143.46    0.74   5
   4   6  -9   27.94    0.77   5
   4   6  -8    2.66    0.66   5
   1  12 -12   18.39    0.66   5
   2  -1 -13  227.84    0.96   5
   2   7 -16   18.50    0.80   5
   2  10 -13   80.86    0.87   5
   4   1  -9   42.72    0.60   5
   4   1  -8  251.68    0.85   5
   4   2  -6  830.98    1.26   5
   4   5 -11   -0.93    0.68   5
   1   2 -17    3.02    0.75   5
   1   8 -17   50.85    0.78   5
   1  11 -14   86.74    0.88   5
   3  -1 -10  126.92    0.67   5
   3   6 -14   91.33    1.03   5
   3   7  -4  249.65    0.77   5
   4   3 -11   80.57    0.86   5
   4   3  -6 1563.66    1.74   5
   4   4 -11   39.25    0.82   5
   4   4  -6  281.24    0.86   5
   4   5 -10    8.77    0.81   5
   4   5  -7  165.34    0.82   5
  -1   4 -19   22.93    0.62   5
   2   1 -15  127.88    0.97   5
   2   8 -15    2.19    0.80   5
   3  -1  -9  181.01    0.68   5
   3   0 -12   90.80    0.78   5
   3   7 -13   65.55    0.97   5
   4   2 -10   52.27    0.64   5
   4   2  -7   19.75    0.48   5
   0   3 -18   53.98    0.81   5
   0   8 -18    4.26    0.59   5
   1  -1 -14   44.58    0.63   5
   1  12 -11   15.58    0.68   5
   2  10 -12   14.77    0.81   5
   3   3 -14   24.55    0.88   5
   3   5 -14   26.54    0.92   5
   3   8 -11   22.15    0.85   5
   3   8  -6  500.19    1.18   5
   4   2  -9  546.60    1.22   5
   4   3  -7  144.74    0.72   5
   4   4 -10   11.13    0.63   5
  -1   5 -19   32.30    0.71   5
   1   0 -15   93.48    0.85   5
   1   1 -16   23.09    0.76   5
   1   7 -17   20.40    0.75   5
   1   9 -16   31.80    0.65   5
   1  12 -10  107.12    0.89   5
   2   4 -16  117.87    1.06   5
   2   5 -16    0.64    0.81   5
   3   4 -14  180.23    1.06   5
   4   3  -9   99.38    0.77   5
   4   3  -8  213.56    0.89   5
   4   4  -9    9.68    0.59   5
   4   4  -8   -0.08    0.52   5
  -1   6 -19   48.39    0.69   5
   2  -1 -12   15.66    0.58   5
   3   6 -13    0.51    0.83   5
   3   7 -12    3.42    0.87   5
   3   8 -10   39.21    0.82   5
   3   8  -7   10.23    0.62   5
   0   4 -18    1.35    0.71   5
   0  12 -14    0.25    0.58   5
   1   4 -17   21.13    0.83   5
   1   6 -17   57.26    0.90   5
   1  11 -13   13.22    0.73   5
   2   7 -15   50.47    0.90   5
   3   2 -13    8.19    0.78   5
   3   7  -5  311.99    0.90   5
   3   8  -9   36.66    0.82   5
   3   8  -8  200.30    0.97   5
   0   9 -17   10.15    0.63   5
   2   8 -14   62.09    0.94   5
   2  10 -10   14.87    0.82   5
   3   5 -13  130.00    1.04   5
   0   2 -17    8.21    0.71   5
   1   8 -16   24.66    0.81   5
   2   0 -13  124.55    0.82   5
   2   1 -14  114.48    0.90   5
   2   6 -15   -0.65    0.82   5
   3   4 -13    7.19    0.83   5
  -1   3 -18   37.66    0.72   5
   0  10 -16    6.93    0.67   5
   1  -1 -13   40.26    0.61   5
   1   2 -16    7.17    0.77   5
   2  10  -9   48.86    0.78   5
   2  10  -8    9.66    0.65   5
   3   6 -12    8.57    0.81   5
  -2   5 -19   35.13    0.62   5
   1   9 -15   41.60    0.76   5
   1  11 -12   57.97    0.80   5
   2  -1 -11  224.94    0.78   5
   2   4 -15    0.79    0.82   5
   2   5 -15  109.79    0.95   5
   2   9 -12   63.72    0.92   5
   3   1 -11  354.10    1.08   5
   3   2 -12    4.14    0.70   5
  -2   6 -19   30.35    0.61   5
   0   1 -16   40.75    0.72   5
   0   8 -17   27.43    0.72   5
   0  12 -13    9.17    0.65   5
   1   0 -14   72.97    0.78   5
   1   1 -15   49.89    0.77   5
   1   7 -16   44.98    0.88   5
   2   7 -14  166.01    1.12   5
   3   5 -12   83.08    0.91   5
   3   7  -9   10.24    0.71   5
   3   7  -7   31.67    0.62   5
  -1   4 -18  185.43    1.04   5
  -1   8 -18   19.37    0.65   5
  -1  10 -17   10.56    0.55   5
   0   3 -17    1.11    0.75   5
   2   8 -13   49.70    0.84   5
   3   3 -12   41.47    0.70   5
   3   4 -12    5.39    0.73   5
   3   6 -11   88.37    0.86   5
   3   6  -5  303.64    0.83   5
   3   7  -8   18.66    0.67   5
  -1  11 -16    3.15    0.61   5
   1   6 -16   24.62    0.86   5
   1  11 -11    4.44    0.72   5
   2  -1 -10    0.92    0.37   5
   2   0 -12  703.74    1.38   5
   2   9 -11   31.98    0.83   5
   3   1 -10  162.52    0.73   5
   3   2 -11   69.57    0.74   5
  -1   2 -17   13.63    0.70   5
  -1   5 -18   10.47    0.78   5
  -1  13 -13    0.15    0.58   5
   0  11 -14   50.92    0.78   5
   1   5 -16   48.62    0.95   5
   1   8 -15  121.74    1.03   5
   1  10 -13   67.01    0.81   5
   2   1 -13  445.12    1.26   5
   2   3 -14  257.39    1.20   5
   2   6 -14   70.33    0.87   5
   3   5 -11   62.45    0.83   5
   3   6 -10    6.38    0.74   5
  -1   6 -18   66.33    0.81   5
   0   4 -17   24.72    0.80   5
   0   6 -17   77.20    0.93   5
   0   9 -16   53.83    0.73   5
   0  12 -12    2.26    0.66   5
   1  -1 -12   14.14    0.49   5
   1   9 -14   56.31    0.91   5
   1  11 -10    2.38    0.69   5
   2   4 -14  265.29    1.21   5
   2   5 -14  168.74    1.12   5
   2   9 -10   20.37    0.82   5
   2   9  -6  199.37    0.86   5
   3   1  -9  382.97    0.94   5
   3   3 -11  413.38    1.18   5
   3   4 -11  130.14    0.90   5
   3   6  -6   97.34    0.63   5
   0  10 -15   17.63    0.76   5
   1   2 -15   45.43    0.83   5
   2   7 -13   53.23    0.83   5
   3   1  -8  173.65    0.67   5
   3   2 -10   20.32    0.58   5
   3   5 -10   26.29    0.73   5
   3   5  -5    2.60    0.32   5
   3   6  -8   44.22    0.67   5
   3   6  -7   13.47    0.55   5
  -1   9 -17   53.31    0.75   5
   0   2 -16    0.68    0.69   5
   1   7 -15   26.12    0.86   5
   1  11  -8   91.12    0.82   5
   2   0 -11  679.17    1.27   5
   2   9  -9   42.46    0.78   5
   2   9  -8   91.40    0.80   5
   2   9  -7   51.69    0.69   5
  -2   4 -18   48.75    0.74   5
  -1  12 -14   40.08    0.77   5
   0  12 -11    4.27    0.73   5
   1   0 -13    3.77    0.54   5
   1   1 -14   12.93    0.70   5
   1  10 -12   16.87    0.71   5
   2   6 -13   41.14    0.88   5
   3   2  -9  205.28    0.80   5
   3   3 -10   64.03    0.64   5
   3   4 -10  116.71    0.76   5
   3   5  -9   84.72    0.78   5
   3   5  -6  400.27    0.95   5
  -1   3 -17    3.42    0.71   5
  -1  13 -12   68.05    0.75   5
   0   1 -15    4.53    0.72   5
   0   8 -16    8.61    0.68   5
   0  11 -13   44.15    0.80   5
   1   3 -15    3.24    0.80   5
   2   1 -12    1.17    0.52   5
   3   2  -8  823.20    1.30   5
  -2   8 -18    9.18    0.58   5
  -2  14 -12    1.92    0.56   5
  -1   8 -17    6.95    0.69   5
  -1  10 -16   49.67    0.76   5
  -1  11 -15    4.48    0.70   5
   0   0 -14   72.53    0.69   5
   0   3 -16    6.62    0.85   5
   1   4 -15    9.31    0.86   5
   1   6 -15   49.04    0.82   5
   1   8 -14   32.21    0.79   5
   1   9 -13   59.06    0.95   5
   2   3 -13  282.41    1.11   5
   2   5 -13  110.61    0.97   5
   2   7 -12    5.36    0.69   5
   3   3  -9  187.51    0.77   5
   3   4  -9    7.91    0.50   5
  -2   5 -18   37.31    0.74   5
  -2   7 -18    1.93    0.65   5
  -2  10 -17   11.77    0.60   5
  -2  13 -14    5.20    0.59   5
   0   7 -16   31.78    0.84   5
   0   9 -15    6.34    0.79   5
   0  10 -14   11.68    0.80   5
   0  12 -10    3.46    0.74   5
   1  -1 -11   16.19    0.40   5
   1   5 -15  106.76    0.92   5
   1  10 -11  127.75    1.02   5
   2   0 -10   90.62    0.57   5
   2   4 -13   96.52    0.85   5
   2   8 -10  160.20    1.02   5
   2   8  -5   56.85    0.55   5
   3   3  -8  142.22    0.66   5
   3   3  -7  159.08    0.66   5
   3   4  -8  261.57    0.85   5
   3   4  -7    7.72    0.45   5
  -3   4 -18   18.98    0.67   5
  -2   6 -18   36.72    0.75   5
  -1  13 -11   20.53    0.73   5
   2   2 -12  196.60    0.95   5
  -2  11 -16   37.52    0.68   5
  -1   7 -17   10.76    0.77   5
   0   6 -16    0.38    0.84   5
   0  12  -9  220.36    1.02   5
   1   7 -14   73.58    0.98   5
   2   6 -12  151.94    0.95   5
   2   7 -11   98.33    0.94   5
   2   8  -9    3.06    0.69   5
   2   8  -6   16.07    0.55   5
  -2  14 -11   60.09    0.70   5
  -1   2 -16    4.21    0.65   5
  -1   5 -17  165.84    1.04   5
  -1  12 -13   23.20    0.71   5
   0  11 -12   18.64    0.76   5
   1   0 -12  599.46    1.21   5
   1   1 -13   15.71    0.63   5
   1  10 -10    7.34    0.75   5
   2   3 -12   98.82    0.84   5
   2   5 -12    5.37    0.72   5
   2   8  -8  153.71    0.90   5
   2   8  -7    3.67    0.55   5
  -3   5 -18    6.99    0.70   5
  -2   3 -17   95.00    0.83   5
  -2   9 -17   53.74    0.75   5
  -1   9 -16    4.30    0.64   5
  -1  13 -10   47.63    0.78   5
   0  -1 -12   50.60    0.51   5
   0   2 -15   15.94    0.72   5
   0   8 -15   29.05    0.87   5
   1   6 -14   46.44    0.89   5
   1   8 -13    8.02    0.72   5
   2   4 -12    9.64    0.72   5
  -2  13 -13    3.99    0.70   5
  -1   1 -15   17.58    0.67   5
  -1  10 -15   19.82    0.75   5
   1  10  -9    2.10    0.69   5
   1  10  -6  328.75    1.02   5
   2   6 -11   90.27    0.89   5
  -3   7 -18   16.55    0.67   5
   0   0 -13  127.44    0.75   5
   0   1 -14  215.86    0.95   5
   0   9 -14   36.57    0.87   5
   1   4 -14   86.79    0.86   5
   1   5 -14   71.53    0.84   5
   1  10  -8   56.35    0.77   5
   1  10  -7    6.99    0.63   5
   2   2 -11  577.33    1.25   5
  -2   4 -17    6.63    0.77   5
  -2   8 -17   17.58    0.76   5
  -1   3 -16   15.81    0.78   5
  -1   8 -16   11.21    0.81   5
  -1  13  -9   18.40    0.68   5
   0   7 -15    3.78    0.84   5
   0  11 -11    8.25    0.77   5
   1   7 -13   20.80    0.87   5
   1   9 -11   77.14    0.86   5
   2   5 -11    6.16    0.67   5
   2   7  -5  320.05    0.84   5
  -4   5 -18    2.86    0.58   5
  -3  10 -17    1.99    0.49   5
  -2   2 -16   11.13    0.71   5
  -2  10 -16    1.03    0.68   5
   1   2 -13   66.36    0.77   5
   1   8 -12    5.02    0.84   5
   2   3 -11  121.22    0.75   5
   2   4 -11   27.00    0.70   5
   2   6 -10   89.28    0.83   5
  -2   5 -17   90.64    0.91   5
   0   6 -15   62.96    0.93   5
   1   0 -11  298.60    0.85   5
   1   1 -12    3.14    0.55   5
   2   1  -9  961.49    1.34   5
   2   7  -8   64.12    0.64   5
   2   7  -7   87.51    0.67   5
   2   7  -6   25.82    0.49   5
  -4   6 -18    7.02    0.60   5
  -4   8 -18   34.02    0.66   5
  -2   6 -17   75.51    0.91   5
  -1   4 -16   11.95    0.79   5
  -1   7 -16    3.22    0.69   5
  -1   9 -15    0.69    0.77   5
   0  -1 -11   45.64    0.46   5
   0   5 -15   13.62    0.76   5
   0   8 -14    0.23    0.84   5
   0  11 -10  347.69    1.26   5
   1   3 -13  150.87    0.97   5
   1   6 -13  139.06    0.94   5
   1   9 -10    2.33    0.74   5
   2   2 -10  437.89    1.04   5
  -4   7 -18    3.49    0.60   5
  -3  11 -16   15.95    0.62   5
  -2  13 -12    5.72    0.67   5
  -1   5 -16    7.55    0.85   5
  -1   6 -16   17.69    0.85   5
   0   2 -14  170.05    0.95   5
   0   9 -13   30.79    0.88   5
   1   4 -13    1.64    0.73   5
   1   5 -13   67.51    0.89   5
   2   3 -10  106.93    0.71   5
   2   5 -10   84.17    0.69   5
   2   6  -9   40.79    0.68   5
  -3   4 -17    0.16    0.72   5
  -3   9 -17    5.60    0.59   5
  -3  12 -15   -1.10    0.60   5
  -3  14 -12   65.73    0.70   5
  -2   9 -16   64.65    0.85   5
  -1   2 -15   16.10    0.69   5
  -1  10 -14    2.68    0.67   5
  -1  12 -11   70.53    0.83   5
   0  11  -9   83.19    0.88   5
   1   7 -12    5.53    0.77   5
   1   8 -11   -0.11    0.78   5
   1   9  -9  228.05    1.05   5
   2   4 -10    7.08    0.51   5
   0   7 -14   38.01    0.88   5
   2   2  -9  253.96    0.77   5
  -4  10 -17    7.68    0.58   5
  -3   8 -17    1.74    0.70   5
  -1   1 -14   80.17    0.74   5
  -1   8 -15    6.83    0.83   5
   0   0 -12   11.30    0.45   5
   0   1 -13   89.03    0.70   5
   0   3 -14   56.86    0.82   5
   0  10 -11   76.77    0.92   5
   1   9  -8   37.29    0.71   5
   1   9  -5   19.73    0.46   5
   2   5  -9   58.63    0.60   5
   2   6  -6   72.61    0.54   5
  -3   5 -17   10.49    0.70   5
  -2  10 -15   17.49    0.79   5
  -2  12 -13    2.09    0.61   5
  -2  13 -11   38.88    0.73   5
  -1   0 -13  119.30    0.70   5
  -1  12 -10   52.68    0.86   5
   0   6 -14    3.63    0.79   5
   0  11  -7  158.24    0.88   5
   1   1 -11   52.29    0.55   5
   1   6 -12  180.51    0.96   5
   1   9  -7   37.65    0.63   5
   1   9  -6   27.73    0.53   5
   2   3  -9  430.34    0.99   5
   2   4  -9  390.44    1.00   5
  -3   6 -17    1.34    0.70   5
  -3   7 -17   48.92    0.81   5
  -3  10 -16    4.13    0.68   5
  -3  14 -11    2.49    0.67   5
  -2   8 -16    3.53    0.68   5
  -2  11 -14    7.17    0.77   5
  -1   3 -15    1.42    0.71   5
  -1  11 -12   30.45    0.82   5
   0   8 -13    5.90    0.71   5
   0   9 -12   35.58    0.92   5
   1   3 -12  241.06    1.00   5
   1   5 -12    2.10    0.69   5
   1   7 -11  139.88    0.97   5
   2   5  -8    9.11    0.44   5
  -3  13 -13    8.25    0.65   5
  -2   4 -16   37.97    0.82   5
  -1   7 -15    2.32    0.81   5
  -1   9 -14    8.85    0.81   5
  -1  10 -13    8.88    0.83   5
   2   4  -8   18.14    0.46   5
  -4   9 -17    9.70    0.66   5
  -4  11 -16    2.70    0.59   5
  -3  11 -15    3.81    0.66   5
  -2   7 -16   64.97    0.92   5
  -1   4 -15    6.50    0.79   5
  -1   6 -15    3.22    0.83   5
  -1  12  -9  195.16    1.04   5
   0  10 -10  103.56    0.91   5
   1   8  -9   -0.33    0.65   5
  -4   5 -17   10.81    0.76   5
  -3   3 -16    2.06    0.63   5
  -3  12 -14   11.64    0.72   5
  -2  13 -10   14.63    0.70   5
   0   7 -13    2.86    0.81   5
   1   6 -11   62.65    0.78   5
   2   4  -7  975.74    1.33   5
  -4  12 -15    3.51    0.63   5
  -3   9 -16   50.65    0.84   5
  -2   9 -15   18.79    0.80   5
  -2  12 -12    6.41    0.76   5
  -1   2 -14  127.92    0.83   5
  -1  11 -11   32.97    0.81   5
   1   1 -10   13.49    0.41   5
   1   7 -10    6.89    0.69   5
   1   8  -4  134.35    0.58   5
  -4   6 -17    3.05    0.67   5
  -4   7 -17   24.72    0.73   5
  -3  14 -10    4.87    0.64   5
  -1   8 -14    7.89    0.82   5
  -1  12  -8    4.09    0.62   5
   0   0 -11   20.40    0.41   5
   0   1 -12   28.05    0.54   5
   0   8 -12   59.63    0.88   5
   0  10  -9   84.14    0.87   5
   1   3 -11   15.67    0.58   5
   1   5 -11    5.64    0.63   5
   1   8  -8  530.61    1.26   5
  -5   5 -17   -0.29    0.61   5
  -4  14 -12   23.61    0.71   5
  -3  13 -12   26.66    0.72   5
  -2   1 -14  314.85    1.00   5
  -2  10 -14    1.43    0.80   5
  -2  13  -9    9.70    0.71   5
  -1  12  -7   62.64    0.75   5
   0   6 -13   23.67    0.70   5
   1   4 -11   31.02    0.63   5
   1   8  -7  155.39    0.77   5
   1   8  -5   15.94    0.44   5
  -3   8 -16   11.02    0.82   5
  -2   3 -15    4.75    0.67   5
  -2   8 -15    2.50    0.81   5
  -1   1 -13  124.25    0.72   5
  -1   9 -13   21.91    0.85   5
  -1  10 -12  112.83    1.03   5
   0   4 -13    6.86    0.71   5
   0   5 -13  151.84    0.97   5
   1   6 -10  265.66    1.02   5
   1   8  -6  327.65    0.91   5
  -5   6 -17   11.97    0.73   5
  -5   8 -17    9.77    0.67   5
  -5  11 -16   15.62    0.58   5
  -3  10 -15    1.88    0.73   5
  -3  14  -9   26.70    0.73   5
  -1   0 -12   13.34    0.42   5
  -1   3 -14   18.38    0.72   5
  -1   7 -14   20.78    0.83   5
  -1  11 -10  226.20    1.11   5
   1   2 -10 1717.55    1.86   5
  -5   7 -17    7.02    0.66   5
  -3   5 -16   55.71    0.87   5
  -2  12 -11   36.25    0.82   5
  -2  13  -8    6.53    0.72   5
   0   2 -12  494.55    1.18   5
   0   7 -12   29.94    0.70   5
   0  10  -7  275.72    0.98   5
  -6   6 -17   10.19    0.60   5
  -4  11 -15   27.01    0.74   5
  -3   6 -16   29.87    0.82   5
  -3  11 -14   20.56    0.69   5
  -2   4 -15   23.45    0.81   5
  -2   7 -15    7.21    0.80   5
  -1   5 -14    8.88    0.79   5
  -1   6 -14    3.23    0.68   5
   0   8 -11   16.90    0.78   5
   0  10  -6  603.28    1.24   5
   0  10  -5  376.90    0.96   5
   1   3 -10    5.73    0.50   5
   1   5 -10   37.49    0.56   5
  -6   7 -17    5.33    0.65   5
  -6   8 -17   10.56    0.61   5
  -5  12 -15   45.63    0.66   5
  -5  13 -14   48.40    0.69   5
  -4   9 -16    7.78    0.75   5
  -4  12 -14   87.04    0.83   5
  -3  13 -11    8.81    0.71   5
  -2   6 -15    3.71    0.87   5
  -2   9 -14   10.86    0.82   5
  -1   8 -13    4.37    0.82   5
   0   6 -12   12.62    0.71   5
   1   4 -10  868.43    1.44   5
   1   6  -9    0.82    0.57   5
  -4  14 -11   64.27    0.77   5
  -3   9 -15   59.42    0.91   5
  -2   2 -14   78.77    0.74   5
  -2  10 -13   55.35    0.89   5
  -1   2 -13    8.94    0.58   5
  -1  11  -9    3.21    0.75   5
   0   1 -11  153.97    0.65   5
   0   9  -9  156.08    0.93   5
   1   7  -7   11.08    0.47   5
  -5  10 -16    2.19    0.65   5
  -3   3 -15  181.63    1.00   5
  -2  12 -10    2.56    0.73   5
  -1   9 -12   13.82    0.71   5
   0   4 -12  269.76    1.04   5
   0   5 -12    4.10    0.66   5
   1   2  -9   44.66    0.42   5
   1   7  -6   29.60    0.46   5
  -4   5 -16    5.80    0.71   5
   0   7 -11  136.39    0.91   5
   0   8 -10   54.72    0.80   5
   1   7  -5   76.85    0.49   5
  -5  15 -10   21.02    0.63   5
  -4   6 -16   71.87    0.87   5
  -4   7 -16    4.51    0.78   5
  -2   1 -13  269.36    0.93   5
  -2   8 -14    4.53    0.71   5
  -1   1 -12   96.09    0.66   5
  -1  11  -8  620.38    1.43   5
   0   9  -8   59.18    0.72   5
   1   3  -9  158.70    0.64   5
  -6  12 -15    1.37    0.55   5
  -5   9 -16   12.90    0.74   5
  -5  14 -12    3.12    0.65   5
  -4  13 -12   70.69    0.81   5
  -3   8 -15    8.23    0.71   5
  -3  11 -13   73.79    0.95   5
  -3  13 -10   38.96    0.78   5
  -2   3 -14  165.96    0.93   5
  -1   3 -13    2.27    0.63   5
  -1  10 -10    6.15    0.75   5
   0   2 -11  180.62    0.75   5
  -1   6 -13    4.79    0.65   5
 -13   4  -8   97.87    0.76   6
 -13   8  -4   80.40    0.85   6
 -11   5  -9   41.19    0.91   6
 -10   9  -3  174.89    1.01   6
  -9   4 -10   33.64    0.97   6
  -7   7  -6   63.26    0.75   6
  -6   5  -8   15.45    0.56   6
  -5   6  -5   67.94    0.48   6
  -4   0 -10   95.76    0.63   6
  -4   3  -8  223.87    0.73   6
 -10   4 -10   14.16    0.93   6
  -9   2 -11   16.49    0.92   6
  -8   2 -11   52.95    0.98   6
  -8   4 -10   62.72    0.87   6
  -8   7  -7  580.58    1.51   6
  -8   8  -5  129.37    0.89   6
  -5   5  -7   28.71    0.46   6
  -4   2  -9    6.84    0.46   6
  -4   4  -7  256.63    0.78   6
 -12   7  -7    5.73    0.82   6
 -12   9  -3    5.79    0.71   6
  -9   9  -3   32.32    0.70   6
  -7   2 -11   12.89    0.83   6
  -7   5  -9   95.52    0.93   6
  -6   1 -11   42.50    0.82   6
  -5  -1 -11    3.43    0.59   6
  -5   2 -10  368.37    1.11   6
 -12   6  -8    0.43    0.75   6
 -11   9  -4   54.25    0.90   6
 -10   0 -11    3.47    0.69   6
 -10   1 -11   23.47    0.79   6
 -10   9  -4   94.20    0.95   6
  -7   4 -10    9.67    0.83   6
  -7   6  -8  102.54    0.88   6
  -7   8  -4  348.96    1.01   6
  -6   6  -7  148.92    0.77   6
 -13   5  -8   10.20    0.61   6
 -13   8  -5    2.10    0.71   6
 -11   4 -10   19.21    0.83   6
 -10  -1 -11    6.66    0.63   6
 -10   2 -11   14.50    0.83   6
 -10   6  -9   68.77    1.07   6
  -9   6  -9  102.14    1.11   6
  -5   0 -11    9.64    0.62   6
 -12   5  -9    1.53    0.72   6
 -12   8  -6    8.63    0.80   6
 -12   9  -4   27.39    0.79   6
  -9   5 -10   56.27    1.01   6
  -9   7  -8   42.90    0.98   6
  -8   9  -2  121.51    0.71   6
  -4   1 -10   36.46    0.57   6
 -13   9  -3    9.14    0.70   6
 -11   6  -9    4.11    0.87   6
 -11   7  -8   75.09    1.00   6
 -10   5 -10   15.34    0.96   6
  -9   9  -4   37.61    0.76   6
  -8   6  -9   66.24    0.97   6
  -7   7  -7   28.71    0.73   6
  -6   2 -11   96.67    0.89   6
  -5   6  -6 1437.54    1.69   6
  -3   1  -9  112.13    0.57   6
 -12   3 -10   23.36    0.66   6
 -11   9  -5   -0.39    0.83   6
 -10   9  -5    4.09    0.84   6
  -8   5 -10   29.68    0.92   6
  -8   9  -3   32.40    0.62   6
  -6   8  -2   51.81    0.46   6
  -5   4  -9    4.87    0.59   6
 -13   6  -8   35.04    0.66   6
 -13   7  -7    3.96    0.67   6
 -11   1 -11   22.06    0.68   6
 -11   5 -10   22.54    0.84   6
  -9   8  -7    9.44    0.91   6
  -8  -1 -12   56.96    0.91   6
  -8   0 -12   46.48    0.83   6
  -8   7  -8    3.61    0.80   6
  -7  -1 -12   34.80    0.86   6
  -7   0 -12   70.52    0.96   6
  -7   8  -5    4.98    0.52   6
  -6   4 -10  275.35    1.12   6
  -6   5  -9    6.02    0.59   6
  -6   7  -6   70.30    0.67   6
  -5   1 -11    2.69    0.62   6
  -5   5  -8   12.44    0.57   6
  -3  -1 -10   24.70    0.42   6
 -13   8  -6   26.76    0.71   6
 -13   9  -4   28.78    0.78   6
 -12   7  -8    4.05    0.78   6
 -12   9  -5   39.38    0.83   6
 -11   2 -11    6.43    0.69   6
  -9   4 -11   42.54    1.01   6
  -8   1 -12   39.89    0.92   6
  -8   4 -11    7.29    0.94   6
  -6   6  -8  195.71    0.93   6
  -6   8  -3  362.00    0.89   6
  -5   7  -4  302.98    0.79   6
  -4  -1 -11  135.52    0.74   6
  -4   3  -9  442.10    1.03   6
  -4   4  -8  889.07    1.37   6
 -10   4 -11   28.34    0.96   6
  -9   0 -12   53.25    0.84   6
  -9   9  -5   70.49    0.88   6
  -8   9  -4  125.70    0.82   6
  -7   1 -12   18.45    0.86   6
  -7   5 -10   65.84    0.93   6
  -7   6  -9   51.47    0.86   6
  -6  -1 -12    4.81    0.71   6
 -10   7  -9   26.15    0.98   6
  -8   2 -12   68.15    0.99   6
  -6   0 -12    2.72    0.69   6
  -4   2 -10   63.73    0.62   6
 -11   7  -9   17.55    0.88   6
 -11   9  -6   17.52    0.87   6
 -11  10  -3  271.85    1.16   6
 -10   6 -10   14.74    0.82   6
 -10   9  -6   59.01    0.95   6
  -9   2 -12   80.41    0.97   6
  -9   6 -10  104.09    1.01   6
  -9   7  -9   63.40    1.01   6
  -8   8  -7   48.13    0.90   6
  -7   4 -11    4.29    0.89   6
  -5   2 -11  119.80    0.84   6
  -5   6  -7  242.29    0.86   6
  -4   0 -11    1.35    0.50   6
  -4   5  -7   10.43    0.43   6
  -3   0 -10  179.32    0.68   6
 -13   9  -5   12.70    0.74   6
 -12   5 -10   68.50    0.77   6
 -11   4 -11   35.10    0.82   6
 -11   6 -10    8.78    0.82   6
 -11   8  -8    7.75    0.91   6
 -10   8  -8   25.02    0.98   6
 -10  10  -3   -0.01    0.74   6
  -7   2 -12  147.50    1.07   6
  -7   7  -8  198.35    0.98   6
  -7   9  -2   36.09    0.52   6
  -6   1 -12   16.06    0.76   6
  -3   2  -9    8.13    0.39   6
 -13   7  -8   12.63    0.63   6
 -12   9  -6    8.36    0.77   6
 -12  10  -3   65.62    0.81   6
 -10   0 -12   15.93    0.63   6
 -10   1 -12    4.80    0.66   6
 -10   2 -12   63.48    0.84   6
 -10   5 -11    6.45    0.91   6
  -9   3 -12    2.34    0.87   6
  -9   5 -11  121.76    1.03   6
  -9   8  -8    4.80    0.95   6
  -9   9  -6  274.93    1.21   6
  -8   3 -12    8.36    0.92   6
  -8   6 -10  138.82    1.01   6
  -8   7  -9  180.00    1.12   6
  -8   9  -5   48.61    0.80   6
  -6   7  -7  490.37    1.20   6
 -12   7  -9    1.17    0.70   6
 -11  10  -4   60.94    0.92   6
  -8   5 -11   71.63    1.03   6
  -7   9  -3   58.36    0.63   6
  -5   4 -10   30.98    0.70   6
 -12   8  -8   12.02    0.81   6
 -10   3 -12   44.68    0.85   6
 -10  10  -4   81.45    0.89   6
  -7   3 -12    8.33    0.86   6
  -6   2 -12  140.87    0.99   6
  -6   5 -10   40.77    0.71   6
  -6   6  -9   84.72    0.83   6
  -6   8  -5 1481.80    1.83   6
  -5   0 -12   82.42    0.76   6
  -5   5  -9  114.63    0.72   6
  -4   1 -11  167.27    0.82   6
 -12   6 -10   26.47    0.72   6
 -11   5 -11   58.01    0.88   6
 -11   9  -7   24.85    0.89   6
 -10   9  -7    4.13    0.90   6
  -9  10  -3    4.98    0.63   6
  -8   8  -8   74.37    0.96   6
  -7   8  -7  137.51    0.94   6
  -6   4 -11    5.82    0.80   6
  -4   4  -9   77.61    0.64   6
  -3   1 -10  174.33    0.70   6
 -13   9  -6    1.41    0.66   6
 -10   7 -10   50.19    1.01   6
  -8   9  -6    9.51    0.75   6
  -7   5 -11   44.60    0.92   6
  -7   6 -10    3.97    0.70   6
  -7   9  -4  112.05    0.73   6
  -5   6  -8  607.89    1.30   6
  -5   7  -6    8.79    0.50   6
 -12   9  -7   87.34    0.89   6
 -11   7 -10    4.58    0.81   6
 -10   6 -11   42.33    0.95   6
 -10   8  -9   91.95    1.07   6
 -10  10  -5    3.08    0.87   6
  -9   6 -11   60.18    1.02   6
  -9   7 -10   57.78    1.02   6
  -9  10  -4    9.31    0.78   6
  -7   7  -9    3.09    0.78   6
  -5   1 -12   71.84    0.77   6
  -4   5  -8  103.85    0.65   6
  -4   6  -6  420.77    0.92   6
 -13  10  -4   70.57    0.75   6
 -12  10  -5  194.21    1.05   6
 -11   8  -9   13.69    0.88   6
  -9   8  -9  193.16    1.20   6
  -8   0 -13    2.85    0.77   6
  -8   1 -13   34.06    0.82   6
  -7   0 -13    0.40    0.79   6
  -6   7  -8   19.70    0.62   6
 -12   5 -11    7.82    0.63   6
 -11   6 -11   11.46    0.76   6
  -9   1 -13   77.70    0.92   6
  -8   6 -11    2.92    0.88   6
  -8   7 -10   -0.29    0.86   6
  -7   1 -13   21.88    0.80   6
  -7   9  -5    5.32    0.64   6
  -6   3 -12   35.09    0.76   6
  -4   2 -11   14.90    0.61   6
 -12   8  -9    2.07    0.75   6
 -11  10  -6   42.15    0.95   6
  -9   2 -13   64.90    0.86   6
  -9   5 -12    2.29    0.96   6
  -9  10  -5  126.62    0.93   6
  -8   2 -13    5.20    0.81   6
  -5   2 -12   54.76    0.81   6
 -13   9  -7    6.10    0.64   6
 -12   7 -10   30.86    0.71   6
 -10   5 -12   27.86    0.87   6
 -10  10  -6   52.19    0.95   6
  -8   5 -12    3.88    0.93   6
  -8   8  -9   67.06    0.96   6
  -8  10  -3    3.85    0.56   6
  -7   2 -13   65.29    0.94   6
  -7   8  -8    5.83    0.69   6
  -6   0 -13   24.64    0.72   6
  -6   5 -11  170.39    1.04   6
  -6   6 -10   19.15    0.77   6
  -5   5 -10   49.36    0.76   6
  -5   7  -7   88.18    0.70   6
  -3   0 -11  100.29    0.64   6
  -3   2 -10  657.76    1.21   6
  -3   4  -8   26.52    0.41   6
 -13  10  -5    1.01    0.60   6
 -12  10  -6    3.07    0.73   6
  -9   3 -13   55.44    0.90   6
  -8   3 -13   12.62    0.86   6
  -6   1 -13   18.31    0.76   6
  -4   0 -12   48.88    0.64   6
  -4   6  -7  160.48    0.67   6
 -12   6 -11    1.12    0.59   6
 -10   2 -13    3.21    0.62   6
  -8  10  -4   11.41    0.66   6
  -7   6 -11   28.51    0.89   6
  -7   9  -6   22.18    0.72   6
  -6   8  -7  740.51    1.51   6
  -5   6  -9    9.34    0.57   6
  -5   8  -4  884.04    1.30   6
  -4   4 -10  674.00    1.36   6
 -11   5 -12    5.71    0.61   6
 -11   8 -10    1.24    0.81   6
 -10   3 -13   16.39    0.75   6
 -10   7 -11   15.58    0.78   6
 -10   8 -10    9.87    0.79   6
  -9   7 -11  169.32    1.21   6
  -9  10  -6   15.63    0.82   6
  -7   7 -10   54.10    0.82   6
  -6   7  -9  172.62    0.93   6
  -6   9  -3    7.62    0.47   6
  -6   9  -2    4.93    0.36   6
  -4   3 -11  272.13    1.01   6
  -4   5  -9    8.28    0.55   6
 -11   7 -11    1.80    0.74   6
 -11  10  -7    5.57    0.81   6
 -10  10  -7   21.47    0.87   6
  -9   4 -13   29.98    0.92   6
  -9   6 -12  118.03    1.09   6
  -9   8 -10  315.57    1.32   6
  -8  10  -5    6.84    0.75   6
  -7   5 -12   16.51    0.81   6
  -6   2 -13   17.73    0.82   6
  -5   3 -12   48.40    0.81   6
  -4   1 -12  220.73    0.93   6
  -3   1 -11  478.92    1.08   6
  -3   5  -7   28.01    0.42   6
 -13  10  -6    6.10    0.58   6
 -12  10  -7    4.92    0.75   6
 -11   9  -9    0.77    0.85   6
 -10   6 -12   29.52    0.77   6
 -10   9  -9    9.81    0.82   6
  -8   4 -13    1.88    0.89   6
  -8   7 -11   85.57    1.03   6
  -7   8  -9   26.65    0.84   6
  -6   9  -4   12.98    0.51   6
  -5   0 -13   17.85    0.66   6
  -5   8  -5  261.57    0.83   6
 -12   8 -10    4.12    0.66   6
 -10   4 -13   17.61    0.74   6
  -9   9  -9   73.45    1.03   6
  -8   6 -12   86.59    1.07   6
  -5   7  -8   77.02    0.68   6
  -4   6  -8   15.18    0.53   6
 -12   7 -11    1.72    0.60   6
 -11   6 -12    0.82    0.68   6
 -10  11  -4   10.95    0.77   6
  -9  10  -7    0.16    0.80   6
  -8   8 -10  152.05    1.04   6
  -7   4 -13   93.91    1.03   6
  -6   3 -13    2.02    0.80   6
  -6   8  -8  342.33    1.20   6
  -6   9  -5    1.35    0.54   6
  -5   1 -13  138.92    0.92   6
  -3   4  -9  216.19    0.76   6
 -11  11  -5   16.96    0.78   6
  -8  10  -6  213.38    1.08   6
  -6   6 -11  242.62    1.10   6
  -5   5 -11    9.97    0.66   6
  -5   6 -10    4.77    0.69   6
 -11  10  -8   34.92    0.84   6
 -10   8 -11   70.43    0.97   6
 -10  10  -8   32.36    0.91   6
 -10  11  -5    9.14    0.83   6
  -8   1 -14   45.12    0.80   6
  -7   7 -11   33.40    0.90   6
  -7  10  -3   32.19    0.56   6
  -6   5 -12   48.16    0.83   6
  -5   2 -13   68.44    0.90   6
  -4   7  -6    0.64    0.38   6
  -3   2 -11   16.25    0.56   6
  -2   1 -10   28.51    0.42   6
 -12  10  -8    3.04    0.72   6
 -11   8 -11   49.04    0.84   6
 -10   7 -12   43.75    0.91   6
  -9   8 -11   14.20    0.91   6
  -8   2 -14   18.49    0.80   6
  -8   9  -9   11.36    0.90   6
  -7   1 -14   32.30    0.80   6
  -7   6 -12    6.06    0.76   6
  -7  10  -4    0.60    0.55   6
  -6   9  -6  303.28    1.04   6
  -4   5 -10  736.59    1.45   6
  -3   5  -8    2.29    0.38   6
 -11   9 -10    2.54    0.80   6
 -11  11  -6   15.29    0.74   6
 -10   9 -10  109.99    0.98   6
  -9   2 -14   36.65    0.74   6
  -9   7 -12   14.86    0.80   6
  -9  10  -8   77.73    0.99   6
  -9  11  -4    2.60    0.68   6
  -8   3 -14   35.78    0.92   6
  -8  10  -7    5.49    0.79   6
  -7   2 -14   33.48    0.83   6
  -7   8 -10   10.72    0.84   6
  -5   7  -9   24.53    0.72   6
  -3   0 -12  351.88    0.99   6
 -12  11  -6   14.15    0.73   6
 -11   7 -12   18.22    0.69   6
 -10  11  -6  127.15    1.04   6
  -9   3 -14    8.76    0.75   6
  -9   9 -10  106.13    1.07   6
  -7  10  -5   40.28    0.70   6
  -6   4 -13  134.09    1.07   6
  -6   8  -9    7.28    0.75   6
  -5   8  -7   64.24    0.70   6
  -4   3 -12  153.06    0.91   6
  -4   6  -9   25.81    0.64   6
 -12   9 -10    1.80    0.66   6
 -10   6 -13    2.82    0.77   6
  -9   6 -13    4.61    0.85   6
  -9  11  -5    4.93    0.69   6
  -8   7 -12    3.23    0.77   6
  -8   8 -11    6.71    0.91   6
  -7   3 -14    5.02    0.80   6
  -6   1 -14   18.65    0.71   6
  -5   3 -13  305.21    1.20   6
  -4   0 -13   82.13    0.70   6
  -4   7  -7   33.95    0.50   6
 -11  10  -9   67.11    0.89   6
  -9   4 -14    7.05    0.78   6
  -8   4 -14   10.70    0.80   6
  -8   6 -13    0.18    0.87   6
  -6   2 -14   18.84    0.84   6
  -4   1 -13   25.06    0.72   6
  -3   1 -12   33.42    0.63   6
  -3   4 -10  271.23    0.92   6
 -11  11  -7    0.95    0.70   6
  -7   9  -9   82.44    0.96   6
  -7  10  -6  122.92    0.88   6
  -6   6 -12   13.93    0.85   6
  -6   7 -11  114.72    0.98   6
  -5   5 -12   55.12    0.87   6
  -5   6 -11  452.68    1.35   6
  -3   3 -11 1336.22    1.79   6
  -2   0 -11   43.35    0.45   6
 -12  10  -9    1.15    0.62   6
 -12  11  -7  145.62    0.89   6
 -10   4 -14   87.80    0.77   6
 -10  11  -7   16.76    0.79   6
  -9  11  -6  321.30    1.19   6
  -8   9 -10    4.79    0.74   6
  -8  10  -8   30.03    0.78   6
  -3   5  -9  147.20    0.68   6
  -3   6  -7    4.99    0.37   6
 -10   8 -12  103.15    0.88   6
 -10   9 -11   70.90    0.94   6
  -9   8 -12   95.46    1.00   6
  -8  11  -4    0.99    0.64   6
  -7   4 -14   37.59    0.87   6
  -7   7 -12    0.16    0.73   6
  -6   3 -14   77.04    0.93   6
  -5   7 -10    9.88    0.73   6
  -5   8  -8  788.57    1.50   6
  -5   9  -3  116.40    0.58   6
  -4   2 -13  177.59    0.97   6
  -4   5 -11  193.79    0.97   6
  -4   7  -8  252.65    0.92   6
 -11   8 -12    3.98    0.62   6
 -11   9 -11   12.71    0.65   6
 -10   7 -13   45.16    0.80   6
  -9   7 -13   51.75    0.90   6
  -9   9 -11  169.89    1.12   6
  -7   6 -13  129.28    0.97   6
  -7   8 -11   23.84    0.77   6
  -7  10  -7   37.06    0.78   6
  -6   8 -10   50.51    0.86   6
  -5   1 -14   14.31    0.68   6
  -5   4 -13  111.17    0.95   6
  -5   9  -4  238.56    0.78   6
  -4   6 -10   50.50    0.70   6
  -4   8  -4  124.94    0.57   6
  -3   2 -12  442.47    1.14   6
  -2   1 -11  555.47    1.08   6
 -11  11  -8   12.29    0.74   6
 -10   5 -14   16.54    0.66   6
  -9  11  -7   73.12    0.89   6
  -8  11  -5    2.83    0.66   6
  -5   9  -5  221.97    0.82   6
  -4   8  -5    4.90    0.41   6
 -12  11  -8    7.26    0.66   6
 -10  11  -8    4.97    0.79   6
  -8   7 -13   15.03    0.85   6
  -8   8 -12   17.36    0.87   6
  -5   2 -14  214.76    1.06   6
  -3   6  -8   49.99    0.54   6
  -9  10 -10   43.79    0.94   6
  -8   2 -15   46.69    0.76   6
  -8   9 -11   67.28    0.97   6
  -8  11  -6   21.42    0.75   6
  -7   9 -10   31.52    0.78   6
  -6   4 -14  119.63    1.00   6
  -6  10  -4    3.24    0.48   6
  -6  10  -3   12.47    0.45   6
  -5   8  -9   75.66    0.81   6
  -4   3 -13  228.71    1.05   6
 -10   6 -14   70.37    0.83   6
  -9   6 -14   28.21    0.83   6
  -8   3 -15   90.00    0.93   6
  -7   2 -15    1.06    0.75   6
  -7  10  -8    8.63    0.79   6
  -6   7 -12    3.09    0.84   6
  -6  10  -5  212.59    0.90   6
  -5   9  -6  318.20    0.96   6
  -4   7  -9   26.00    0.64   6
  -3   5 -10  284.72    0.97   6
  -2   4  -9    5.43    0.42   6
  -9  11  -8   17.43    0.82   6
  -8   6 -14    8.93    0.87   6
  -6   6 -13   43.55    0.93   6
  -6   9  -9  238.52    1.07   6
  -5   3 -14    6.76    0.80   6
  -5   7 -11   17.39    0.79   6
  -3   3 -12  151.34    0.85   6
  -2   2 -11  187.67    0.75   6
 -11  11  -9    0.06    0.70   6
 -11  12  -6    1.18    0.70   6
 -10   8 -13   11.79    0.71   6
 -10   9 -12  113.03    0.93   6
 -10  11  -9    4.89    0.76   6
  -8  11  -7  208.85    1.08   6
  -7   3 -15   30.36    0.76   6
  -7   7 -13    4.08    0.87   6
  -7   8 -12    8.43    0.88   6
  -6   8 -11  134.54    1.03   6
  -6  10  -6   71.83    0.77   6
  -4   5 -12   74.82    0.86   6
  -3   7  -6  151.74    0.64   6
 -11   9 -12   20.87    0.63   6
 -10  10 -11  160.33    1.07   6
  -9   4 -15   10.28    0.65   6
  -9   8 -13    1.44    0.78   6
  -9   9 -12   16.00    0.85   6
  -8   4 -15   45.15    0.80   6
  -8  10 -10   19.44    0.93   6
  -6   2 -15  136.80    0.98   6
  -4   1 -14   46.35    0.74   6
  -4   6 -11   57.35    0.71   6
  -4   8  -7   10.63    0.49   6
  -3   1 -13  621.52    1.31   6
  -3   6  -9    1.61    0.52   6
  -2   0 -12  745.12    1.26   6
 -11  10 -11   54.00    0.76   6
 -10  12  -6   10.17    0.73   6
  -7   9 -11    3.75    0.85   6
  -7  11  -4   42.65    0.67   6
  -5   8 -10    5.09    0.74   6
  -4   4 -13   61.44    0.85   6
  -2   5  -8    7.71    0.37   6
 -11  12  -7   64.23    0.82   6
 -10   7 -14    7.01    0.65   6
  -9   5 -15   49.53    0.84   6
  -9   7 -14    1.62    0.75   6
  -9  10 -11   21.19    0.89   6
  -9  11  -9   17.76    0.82   6
  -8   8 -13   56.04    0.95   6
  -8  11  -8  149.75    1.03   6
  -7   4 -15   10.40    0.76   6
  -6   3 -15    9.75    0.82   6
  -6  10  -7  222.90    0.98   6
  -5   4 -14   29.42    0.83   6
  -4   7 -10  630.31    1.46   6
  -3   7  -7  182.34    0.75   6
 -10  12  -7  114.05    0.98   6
  -8   5 -15   63.90    0.85   6
  -8   7 -14    3.82    0.84   6
  -8   9 -12    5.51    0.84   6
  -7  11  -6  107.82    0.90   6
  -6   9 -10   42.34    0.78   6
  -5   9  -8   60.27    0.82   6
  -4   8  -8  249.81    0.98   6
  -3   2 -13  114.37    0.79   6
  -3   5 -11 1015.37    1.70   6
  -2   1 -12  245.80    0.84   6
  -2   3 -11  502.65    1.13   6
  -2   4 -10  179.05    0.78   6
 -11  11 -10   11.75    0.68   6
 -10  11 -10  100.62    0.94   6
  -9  12  -6   25.37    0.78   6
  -6   7 -13    2.17    0.84   6
  -7   5 -15   98.82    0.94   6
  -6   4 -15  145.79    1.09   6
  -6   8 -12    2.25    0.86   6
  -6  10  -8   92.30    0.91   6
  -5   6 -13  220.12    1.11   6
  -5   7 -12   31.89    0.75   6
  -3   6 -10    9.22    0.61   6
 -11  12  -8    5.25    0.66   6
 -10   9 -13   25.75    0.72   6
  -8  10 -11    0.32    0.73   6
  -8  11  -9   22.28    0.87   6
  -7   8 -13   54.06    0.95   6
  -7  10 -10    3.45    0.76   6
  -7  11  -7  103.54    0.90   6
  -6   6 -14   95.76    1.03   6
  -5   2 -15  189.65    0.98   6
  -4   3 -14   57.01    0.82   6
  -4   6 -12  696.16    1.60   6
  -3   3 -13   76.47    0.85   6
  -3   7  -8   49.96    0.55   6
  -2   2 -12  264.68    0.90   6
  -2   5  -9    7.58    0.41   6
 -10  10 -12   90.41    0.88   6
 -10  12  -8   21.19    0.75   6
  -9   9 -13   60.76    0.88   6
  -9  11 -10  107.76    0.91   6
  -9  12  -7  123.81    0.92   6
  -7   7 -14   40.03    0.88   6
  -7   9 -12   18.02    0.89   6
  -5   8 -11  256.26    1.11   6
  -5   9  -9   19.73    0.68   6
  -4   8  -9   51.55    0.73   6
  -2   6  -7   10.22    0.41   6
  -1   0 -11  483.73    0.95   6
  -1   2 -10   16.75    0.40   6
 -10   8 -14   19.20    0.62   6
  -9   8 -14    5.43    0.73   6
  -9  10 -12   94.17    0.92   6
  -6   9 -11   84.70    0.88   6
  -5   3 -15   12.68    0.76   6
  -4   7 -11   15.10    0.66   6
  -4   9  -4  117.24    0.61   6
  -7  11  -8   45.32    0.82   6
  -6   5 -15   33.22    0.84   6
  -5  10  -5  239.43    0.88   6
  -5  10  -4    7.23    0.46   6
  -4   9  -5  182.01    0.74   6
 -11  11 -11    2.42    0.56   6
 -11  12  -9   71.02    0.72   6
  -9  12  -8    3.98    0.71   6
  -8   8 -14    3.23    0.75   6
  -8   9 -13   42.80    0.77   6
  -8  12  -6  160.48    0.93   6
  -7   3 -16    5.01    0.68   6
  -5  10  -6  661.82    1.38   6
  -4   4 -14  337.16    1.24   6
  -4   9  -6  155.96    0.76   6
  -3   1 -14   70.21    0.74   6
  -3   7  -9  161.61    0.78   6
  -1   1 -11   63.62    0.50   6
 -10  12  -9   43.33    0.75   6
  -9   7 -15   19.36    0.67   6
  -8  10 -12    3.75    0.79   6
  -7  10 -11    2.56    0.71   6
  -5   4 -15  104.68    0.95   6
  -5   7 -13   47.93    0.90   6
  -5   9 -10  108.79    0.93   6
  -4   8 -10  123.34    0.90   6
  -3   4 -13    0.80    0.69   6
  -3   6 -11   26.56    0.61   6
  -3   8  -5   10.23    0.40   6
  -2   3 -12  321.57    1.02   6
  -2   5 -10   73.59    0.60   6
  -2   6  -8  122.37    0.61   6
  -8   7 -15  123.80    0.96   6
  -8  12  -7   11.67    0.74   6
  -7  11  -9   31.91    0.89   6
  -6   7 -14    4.93    0.81   6
  -6   8 -13   30.08    0.79   6
  -6  11  -5   88.91    0.74   6
  -6  11  -4    6.03    0.56   6
  -5   6 -14   47.73    0.94   6
  -5   8 -12   89.46    0.96   6
  -5  10  -7  407.51    1.20   6
  -3   2 -14   19.54    0.67   6
  -2   1 -13  294.55    0.93   6
  -9  12  -9    3.08    0.74   6
  -7   8 -14    8.84    0.80   6
  -6   3 -16   17.80    0.76   6
  -6   9 -12   79.55    0.97   6
  -6  10 -10    1.91    0.74   6
  -4   2 -15   64.73    0.78   6
  -4   6 -13    6.89    0.81   6
  -1   3 -10  205.04    0.70   6
 -10  10 -13   14.44    0.63   6
  -7   9 -13   30.51    0.77   6
  -6  11  -7   16.16    0.74   6
  -4   7 -12  200.89    1.02   6
  -4   9  -8  138.63    0.89   6
  -3   7 -10  277.37    1.05   6
  -3   8  -7    5.90    0.46   6
  -2   6  -9    7.81    0.51   6
  -1   2 -11  261.78    0.81   6
  -1   4  -9   74.88    0.54   6
 -10  12 -10   36.54    0.78   6
  -9   9 -14    4.29    0.59   6
  -9  10 -13    7.11    0.70   6
  -8  12  -8   60.08    0.85   6
  -7   5 -16   18.57    0.73   6
  -7   7 -15   53.79    0.90   6
  -5   5 -15    1.11    0.78   6
  -4   3 -15  213.90    1.05   6
  -4   5 -14  127.37    0.94   6
  -3   3 -14  148.92    0.92   6
  -2   2 -13   68.92    0.67   6
  -9   8 -15    4.63    0.63   6
  -7  10 -12    2.40    0.83   6
  -6   4 -16   75.10    0.82   6
  -5   9 -11   10.62    0.71   6
  -4   8 -11   18.03    0.79   6
  -3   8  -8    5.39    0.60   6
  -2   4 -12   32.18    0.70   6
  -2   5 -11  288.14    1.01   6
  -1   0 -12   13.05    0.46   6
 -10  13  -7   11.38    0.70   6
  -8   6 -16   62.51    0.75   6
  -8   9 -14   46.18    0.80   6
  -7  12  -5   39.54    0.69   6
  -6  10 -11  133.18    1.06   6
  -6  11  -8   22.38    0.77   6
  -5   2 -16   34.49    0.76   6
  -4   9  -9    8.01    0.71   6
  -3   6 -12  205.76    0.98   6
  -9  11 -12   74.88    0.80   6
  -9  12 -10   27.84    0.77   6
  -8   8 -15   80.81    0.85   6
  -8  10 -13   28.80    0.81   6
  -8  12  -9    1.65    0.77   6
  -7  12  -6    8.09    0.65   6
  -5   7 -14   16.11    0.83   6
  -2   7  -7   11.78    0.45   6
  -1   1 -12   89.28    0.58   6
  -7   6 -16  291.00    1.13   6
  -7  12  -7   52.80    0.78   6
  -6   5 -16   40.49    0.81   6
  -6   8 -14   40.15    0.79   6
  -5   8 -13  323.49    1.25   6
  -4   4 -15    3.58    0.75   6
  -3   4 -14    9.61    0.71   6
  -3   7 -11  554.84    1.36   6
  -3   8  -9    1.29    0.61   6
  -1   3 -11    1.12    0.46   6
  -1   4 -10  127.42    0.69   6
  -1   5  -8   90.47    0.52   6
 -10  12 -11   25.55    0.69   6
 -10  13  -8   36.43    0.68   6
  -6   7 -15    1.02    0.79   6
  -6  11  -9  168.32    1.06   6
  -4   7 -13   10.96    0.80   6
  -9  13  -7   64.44    0.77   6
  -8  11 -12    1.48    0.75   6
  -7   8 -15   28.04    0.81   6
  -7   9 -14    4.65    0.66   6
  -7  11 -11   12.14    0.76   6
  -7  12  -8   10.62    0.76   6
  -5   4 -16   33.40    0.77   6
  -5   9 -12    5.15    0.81   6
  -5  10 -10   80.52    0.93   6
  -4   9 -10   89.12    0.89   6
  -2   7  -8  258.15    0.84   6
  -1   2 -12    1.51    0.46   6
  -9  10 -14    1.47    0.60   6
  -9  12 -11    3.94    0.68   6
  -8  12 -10    3.31    0.72   6
  -7  10 -13   39.39    0.86   6
  -6  10 -12   40.55    0.88   6
  -4   8 -12  267.53    1.13   6
  -2   1 -14  314.45    0.98   6
  -2   5 -12  219.88    1.02   6
  -1   5  -9   41.60    0.54   6
 -10  13  -9    0.06    0.64   6
  -9  13  -8   47.47    0.75   6
  -6   6 -16  165.58    1.00   6
  -4   5 -15  107.11    0.95   6
  -3   6 -13   60.00    0.86   6
  -3   8 -10    9.62    0.67   6
  -2   4 -13    2.13    0.67   6
  -9  11 -13   18.54    0.66   6
  -7   4 -17    4.42    0.54   6
  -7  12  -9   54.68    0.88   6
  -5   5 -16    4.40    0.82   6
  -5  11  -5  105.88    0.73   6
  -4   2 -16  230.52    1.01   6
  -4  10  -7    8.83    0.62   6
  -4  10  -4   18.51    0.44   6
  -3   5 -14    4.33    0.78   6
  -3   7 -12   61.88    0.83   6
  -2   2 -14   80.04    0.73   6
  -2   6 -11   21.33    0.59   6
  -2   7  -9  228.25    0.86   6
  -8   9 -15    7.93    0.56   6
  -8  10 -14    1.24    0.56   6
  -5   8 -14    2.06    0.83   6
  -5  10 -11  136.90    1.02   6
  -5  11  -7   37.83    0.74   6
  -5  11  -4    2.51    0.50   6
  -4   3 -16   23.92    0.76   6
  -4   9 -11   48.60    0.84   6
  -1   3 -12  234.57    0.89   6
  -9  13  -9   14.04    0.69   6
  -8  12 -11    3.05    0.72   6
  -7   5 -17   33.78    0.63   6
  -7  11 -12    1.73    0.68   6
  -6   8 -15    7.10    0.77   6
  -6   9 -14    3.47    0.76   6
  -5   7 -15   55.36    0.91   6
  -5  11  -8   15.13    0.72   6
  -4   7 -14   96.49    0.95   6
  -3   9  -4  175.80    0.66   6
  -1   5 -10  162.61    0.79   6
   0   2 -10  309.07    0.80   6
 -10  13 -10   33.98    0.68   6
  -8   8 -16   21.51    0.65   6
  -8  11 -13   38.89    0.76   6
  -7  12 -10    9.06    0.76   6
  -6   4 -17   49.60    0.70   6
  -6  11 -11   69.58    0.95   6
  -5   9 -13    0.40    0.70   6
  -4   8 -13   87.89    0.97   6
  -4  10  -3   80.56    0.50   6
  -3   8 -11   37.38    0.79   6
  -2   3 -14  186.33    0.93   6
  -2   7 -10  120.10    0.83   6
  -1   1 -13  133.18    0.69   6
  -8  13  -8    0.78    0.66   6
  -6  10 -13    7.82    0.80   6
  -3   4 -15   82.90    0.87   6
  -1   6  -8   36.29    0.44   6
  -7   6 -17    1.67    0.64   6
  -7  10 -14   38.88    0.71   6
  -6   5 -17    2.76    0.67   6
  -5   6 -16   26.69    0.78   6
  -5  11  -9   16.43    0.78   6
  -2   6 -12   39.64    0.68   6
  -2   8  -5   48.09    0.47   6
  -1   2 -13    8.42    0.53   6
   0   1 -11  177.39    0.65   6
  -9  13 -10   69.14    0.76   6
  -8  13  -9   36.39    0.79   6
  -7   8 -16   93.54    0.82   6
  -5  10 -12   32.62    0.88   6
  -4   9 -12   31.97    0.84   6
  -3   7 -13  247.74    1.09   6
  -2   4 -14   10.40    0.71   6
  -1   4 -12   13.37    0.63   6
  -1   6  -9  121.72    0.70   6
   0   4  -8  200.50    0.67   6
  -7  11 -13   16.29    0.76   6
  -7  12 -11    5.04    0.75   6
  -5   4 -17   80.83    0.84   6
  -4   5 -16    8.70    0.83   6
  -4  10 -10  104.49    0.97   6
  -2   7 -11  145.85    0.92   6
  -2   8  -8    1.81    0.49   6
  -1   5 -11  124.48    0.74   6
   0   3 -10   12.23    0.41   6
  -8  10 -15    9.82    0.57   6
  -6  11 -12    4.48    0.80   6
  -6  12  -9   70.01    0.88   6
  -5   8 -15   71.11    0.92   6
  -3   5 -15  389.68    1.31   6
  -3   8 -12   83.20    0.89   6
  -1   3 -13    2.55    0.60   6
   0   2 -11  176.11    0.69   6
  -8  11 -14   21.01    0.65   6
  -6   6 -17   12.91    0.68   6
  -6   9 -15    1.44    0.73   6
  -5   9 -14   40.27    0.77   6
  -4   7 -15   64.85    0.93   6
  -4   8 -14  239.81    1.21   6
  -2   2 -15   12.39    0.60   6
  -2   8  -9   21.21    0.62   6
   0   4  -9  893.04    1.33   6
  -9  13 -11    5.67    0.61   6
  -8  13 -10    6.55    0.66   6
  -6   8 -16   23.75    0.75   6
  -6  10 -14   57.02    0.86   6
  -5   5 -17   -0.55    0.69   6
  -3   3 -16    1.39    0.66   6
  -2   6 -13    1.94    0.74   6
  -1   6 -10   31.25    0.54   6
  -7  13  -8   66.13    0.78   6
  -6  12 -10    0.37    0.75   6
  -5  10 -13  210.77    1.15   6
  -5  11 -11   18.65    0.84   6
  -4   9 -13   25.67    0.86   6
  -4  10 -11    5.52    0.67   6
  -2   3 -15    3.81    0.67   6
  -2   5 -14    6.38    0.72   6
  -1   1 -14   73.12    0.67   6
   0   1 -12   22.10    0.48   6
  -7   9 -16    5.67    0.60   6
  -4   3 -17    9.30    0.67   6
  -3   4 -16  156.88    1.02   6
  -3   7 -14   42.71    0.87   6
  -3   9 -11  197.34    1.08   6
  -2   7 -12  182.56    0.94   6
  -2   8 -10   11.27    0.58   6
  -1   4 -13    8.77    0.64   6
  -1   5 -12   85.10    0.74   6
   0   4 -10  104.35    0.65   6
  -7  11 -14    4.79    0.66   6
  -7  13  -9    0.88    0.67   6
  -6   7 -17    6.23    0.62   6
  -6  11 -13    0.66    0.76   6
  -4  11  -7   47.98    0.73   6
  -3   8 -13   46.52    0.86   6
  -3  10  -6   38.17    0.61   6
  -1   2 -14  128.75    0.78   6
  -1   6 -11   31.21    0.68   6
  -1   7  -8  150.06    0.70   6
  -8  13 -11   22.63    0.69   6
  -5   6 -17   12.16    0.70   6
  -4   4 -17    7.75    0.69   6
  -4  11  -8   22.38    0.65   6
  -3  10  -5   43.62    0.55   6
  -2   4 -15   26.24    0.79   6
   0   2 -12  505.30    1.10   6
   0   5  -8   19.80    0.39   6
  -7  13 -10   21.19    0.81   6
  -5   9 -15    6.74    0.77   6
  -5  12  -8   24.97    0.79   6
  -4  10 -12  166.16    1.08   6
  -4  11  -9   76.34    0.88   6
  -2   8 -11    4.98    0.70   6
  -1   3 -14   15.23    0.63   6
  -1   7  -9  128.95    0.72   6
  -9  14  -9   21.24    0.62   6
  -5   8 -16   14.45    0.75   6
  -5  11 -12   37.49    0.76   6
  -4  11  -4  163.05    0.72   6
  -3   5 -16   57.03    0.86   6
  -3   9 -12   30.45    0.85   6
  -2   9  -6   32.00    0.54   6
   0   5  -9    5.71    0.41   6
  -7  12 -13   30.09    0.73   6
  -6   9 -16   12.91    0.60   6
  -6  10 -15    6.26    0.59   6
  -5  10 -14   -0.19    0.73   6
  -5  12  -9  159.20    1.00   6
  -4   5 -17   10.84    0.67   6
  -4   9 -14  169.98    1.01   6
  -3  10  -4   26.59    0.45   6
  -2   7 -13  200.44    1.07   6
  -2   9  -8    5.71    0.64   6
  -1   7 -10  353.34    1.12   6
   0   3 -12    4.77    0.53   6
  -8  13 -12    9.14    0.63   6
  -6  13  -7  106.36    0.83   6
  -3   7 -15   50.67    0.90   6
  -3  10 -10   23.32    0.80   6
  -2   5 -15   97.49    0.90   6
  -1   6 -12   14.16    0.71   6
   0   5 -10   15.83    0.54   6
  -7  10 -16   19.96    0.58   6
  -7  13 -11   16.67    0.71   6
  -6  11 -14   12.00    0.71   6
  -6  13  -8   15.41    0.70   6
  -5   7 -17    8.26    0.66   6
  -5  12 -10   11.46    0.80   6
  -3   8 -14   50.51    0.79   6
  -2   8 -12    7.62    0.74   6
  -2   9  -9  202.04    0.93   6
  -1   4 -14   28.21    0.72   6
   0   1 -13   95.44    0.63   6
  -8  14  -9    2.05    0.61   6
  -7  11 -15   21.67    0.59   6
  -6  13  -9   18.02    0.73   6
  -5  11 -13    3.22    0.76   6
  -4  10 -13  144.82    0.97   6
  -3   3 -17  100.64    0.85   6
  -3   6 -16   28.11    0.79   6
  -2   3 -16   22.04    0.65   6
   0   2 -13    5.68    0.52   6
  -5   5 -18   19.30    0.61   6
  -4   6 -17    2.84    0.67   6
  -4  11 -11    6.52    0.81   6
  -3   9 -13  199.63    1.06   6
  -3  10 -11   14.02    0.78   6
  -1   7 -11   76.63    0.72   6
   0   4 -12  234.65    0.94   6
   0   6  -8    5.47    0.44   6
   0   6  -7  981.25    1.38   6
  -3   4 -17    2.01    0.63   6
  -2   4 -16   26.59    0.79   6
  -2   7 -14    2.23    0.79   6
  -1   8  -8    1.23    0.57   6
   0   5 -11  567.08    1.30   6
   1   2 -10 1477.89    1.63   6
  -8  14 -10    0.95    0.55   6
  -7  12 -14    2.15    0.57   6
  -7  13 -12    1.51    0.62   6
  -6  12 -13    5.17    0.72   6
  -6  13 -10   23.20    0.75   6
  -5  10 -15   32.32    0.77   6
  -4   8 -16   77.60    0.91   6
  -4   9 -15   12.26    0.76   6
  -1   3 -15    1.01    0.63   6
  -1   5 -14    9.39    0.75   6
  -1   6 -13    4.57    0.65   6
  -6  10 -16   35.59    0.64   6
  -5   6 -18    1.54    0.59   6
  -4  11 -12  119.89    0.98   6
  -2   8 -13   19.97    0.80   6
  -2   9 -11  119.58    0.94   6
  -1   8  -9  132.74    0.77   6
   1   0 -11  284.81    0.76   6
   1   1 -11   47.55    0.48   6
  -7  14  -8    6.19    0.66   6
  -6   9 -17    1.05    0.57   6
  -6  11 -15    5.87    0.61   6
  -4   7 -17   25.09    0.71   6
  -4  10 -14  157.93    1.04   6
  -3   8 -15    6.91    0.78   6
  -3  10 -12   57.10    0.89   6
  -1   7 -12   46.46    0.72   6
  -8  14 -11    0.55    0.58   6
  -7  14  -9    4.07    0.66   6
  -6  13 -11    9.65    0.68   6
  -5  11 -14   19.89    0.66   6
  -4  12  -8   12.73    0.73   6
  -3   9 -14   26.71    0.83   6
  -3  11  -6  505.96    1.24   6
  -2   5 -16   -0.05    0.75   6
  -1   4 -15    5.25    0.73   6
  -1   8 -10    8.95    0.59   6
   1   2 -11  247.10    0.80   6
   1   3 -10    4.75    0.37   6
   1   4  -8 1314.60    1.55   6
  -4   5 -18    3.32    0.62   6
  -4  12  -9   70.04    0.85   6
  -2   9 -12   78.48    0.91   6
   0   2 -14  153.19    0.84   6
  -7  13 -13    3.08    0.59   6
  -6  12 -14    6.08    0.64   6
  -5   7 -18    6.52    0.61   6
  -5  13  -8    1.69    0.66   6
  -3  11  -5  157.40    0.77   6
  -2  10  -6   61.65    0.66   6
  -1   8 -11    5.10    0.69   6
   1   4  -9   39.62    0.46   6
  -7  14 -10    8.58    0.63   6
  -6  13 -12    2.57    0.66   6
  -5  13  -9   13.40    0.71   6
  -5  13  -6    4.30    0.65   6
  -4  11 -13   37.42    0.74   6
  -4  12 -10   12.56    0.78   6
  -3   6 -17    1.54    0.68   6
  -3  10 -13   12.15    0.83   6
  -2   8 -14    4.73    0.78   6
  -2  10  -9    7.73    0.74   6
  -1   7 -13   10.22    0.75   6
   0   3 -14   54.01    0.70   6
   0   7  -7  174.93    0.75   6
   1   3 -11   15.24    0.50   6
  -5   9 -17   13.96    0.61   6
  -5  10 -16    2.64    0.62   6
  -5  12 -13  109.65    0.95   6
  -4   6 -18    7.30    0.64   6
  -4   9 -16    8.48    0.71   6
  -2   6 -16   29.18    0.79   6
  -2  10 -10   36.10    0.83   6
  -1   5 -15    1.64    0.71   6
   1   1 -12    2.93    0.41   6
   1   4 -10  801.80    1.39   6
  -5  11 -15   32.26    0.71   6
  -5  13 -10   48.21    0.83   6
  -4  10 -15    4.95    0.62   6
  -3   8 -16   11.99    0.78   6
  -3  11 -11  107.47    1.02   6
  -1   3 -16   14.08    0.69   6
   1   2 -12  401.93    1.02   6
  -7  14 -11    0.08    0.56   6
  -3   9 -15   55.68    0.78   6
  -2   4 -17    5.82    0.65   6
  -2   9 -13   25.96    0.74   6
  -1   8 -12   72.17    0.80   6
   0   4 -14   15.30    0.71   6
   0   6 -12   12.08    0.72   6
   0   7 -10   12.77    0.64   6
   1   5  -8    0.62    0.41   6
   1   5  -7  665.12    1.14   6
  -6  14  -8   14.89    0.72   6
  -3   7 -17   43.99    0.76   6
  -2  10 -11  114.84    0.97   6
  -1   9  -9    8.15    0.62   6
   1   3 -12  204.35    0.87   6
   1   5  -9    8.38    0.50   6
  -6  12 -15    2.57    0.57   6
  -6  14  -9   31.45    0.72   6
  -5  13 -11    3.69    0.69   6
  -4  11 -14   21.86    0.67   6
  -3  10 -14  154.87    1.04   6
  -3  11 -12   19.52    0.80   6
  -2   5 -17   93.24    0.84   6
  -1   6 -15    2.82    0.78   6
  -1   7 -14   18.68    0.83   6
  -1   9 -10  334.13    1.21   6
  -5  12 -14   46.19    0.75   6
  -4  12 -12   65.12    0.83   6
  -3   5 -18    6.90    0.60   6
  -2   8 -15    0.03    0.67   6
   0   2 -15   14.92    0.63   6
   0   7 -11  133.09    0.90   6
  -6  14 -10   -0.23    0.65   6
  -2   9 -14   10.83    0.81   6
  -2  10 -12   14.10    0.82   6
  -1   8 -13    2.82    0.67   6
   0   6 -13   22.79    0.78   6
  -5  13 -12   39.47    0.76   6
  -4   9 -17    9.61    0.63   6
  -4  10 -16   38.71    0.71   6
  -1   5 -16    4.94    0.72   6
  -1   9 -11   67.54    0.78   6
   1   4 -12  353.51    1.11   6
  -6  14 -11    5.75    0.62   6
  -5  11 -16   16.24    0.56   6
  -4  12 -13   39.62    0.79   6
  -3   6 -18   33.84    0.67   6
  -3   9 -16   49.76    0.82   6
  -3  11 -13   71.01    0.91   6
  -3  12  -8   13.31    0.73   6
  -3  12  -7  122.22    0.85   6
  -2   6 -17   69.45    0.84   6
   0   7 -12   28.16    0.76   6
   0   8  -8  191.64    0.89   6
   1   3 -13  129.85    0.80   6
   1   5 -11    6.52    0.62   6
  -4  11 -15   21.64    0.70   6
  -3  10 -15    0.75    0.70   6
  -3  12  -6   21.28    0.71   6
  -2  11  -7  108.07    0.84   6
   0   4 -15   25.85    0.74   6
   0   8  -9   98.75    0.74   6
  -4   8 -18   25.96    0.60   6
  -2  10 -13   42.86    0.77   6
  -1   8 -14    7.34    0.78   6
  -1   9 -12    9.81    0.69   6
   0   8 -10   46.35    0.76   6
   1   6  -9    0.90    0.46   6
  -6  14 -12   10.92    0.65   6
  -5  12 -15   47.43    0.66   6
  -4  13 -10  134.17    0.95   6
  -2   8 -16    3.07    0.78   6
  -2   9 -15   18.63    0.78   6
  -2  11  -6   10.63    0.60   6
  -1   6 -16   16.86    0.76   6
   1   6 -10  288.10    1.04   6
   1   6  -6  507.39    1.04   6
   2   1 -10   12.95    0.37   6
  -5  14  -8    2.80    0.68   6
  -3  12  -5  223.86    0.93   6
  -2   4 -18   43.92    0.65   6
  -1   4 -17   30.52    0.75   6
   0   5 -15   13.09    0.77   6
   0   7 -13    3.98    0.75   6
   0   8 -11   14.58    0.76   6
   0   8  -5  139.62    0.66   6
  -5  14  -9   63.78    0.77   6
  -4  12 -14   83.12    0.83   6
  -4  13 -11    6.96    0.70   6
  -3  11 -14   19.00    0.66   6
  -2   7 -17   29.28    0.72   6
  -1   9 -13   21.41    0.84   6
  -1  10 -10    6.19    0.75   6
   1   2 -14   39.31    0.61   6
   1   6 -11   58.85    0.75   6
  -5  14 -10    0.27    0.63   6
  -4  10 -17    7.64    0.58   6
  -3  12 -12    7.27    0.78   6
  -2  10 -14    2.62    0.76   6
   0   3 -16    5.19    0.59   6
   1   3 -14   56.78    0.70   6
   2   1 -11  408.97    0.93   6
  -4  11 -16    3.06    0.56   6
  -3   9 -17    6.04    0.65   6
  -3  10 -16    2.62    0.62   6
  -2  11 -12    6.25    0.78   6
  -1   5 -17  178.26    0.95   6
  -1   8 -15    6.68    0.79   6
  -1  10 -11   32.16    0.84   6
   0   8 -12   50.60    0.75   6
   2   0 -11  512.07    0.98   6
   2   2 -11  527.78    1.11   6
  -5  14 -11   51.95    0.73   6
   0   4 -16    8.84    0.66   6
   0   6 -15   51.94    0.86   6
   0   7 -14   32.45    0.87   6
   1   4 -14   65.95    0.80   6
   1   6 -12  157.67    1.00   6
   1   7  -9  257.81    1.00   6
   2   4  -9  325.73    0.94   6
   2   4  -8   12.39    0.44   6
  -3   8 -18   18.18    0.61   6
  -2   6 -18   29.24    0.67   6
  -2   9 -16   59.21    0.82   6
  -1   9 -14    8.22    0.79   6
  -4  12 -15    3.12    0.58   6
  -3  11 -15    3.48    0.59   6
  -3  12 -13    2.54    0.71   6
  -2  11 -13    3.59    0.75   6
  -1   6 -17   20.57    0.72   6
  -1  10 -12  102.75    0.89   6
   0   8 -13    4.83    0.79   6
   1   7 -10    7.59    0.58   6
   2   1 -12    0.79    0.46   6
   2   2 -12  187.07    0.80   6
   2   4 -10    5.53    0.48   6
  -5  14 -12    2.78    0.60   6
  -2  10 -15   15.77    0.75   6
   0   5 -16   23.19    0.75   6
   1   7 -11  130.73    0.93   6
   1   7  -6   28.61    0.47   6
  -6  15 -10   19.99    0.58   6
  -3  13  -9    2.94    0.70   6
  -3  13  -8   33.50    0.73   6
  -2  12  -9    6.03    0.73   6
   0   9 -11   76.11    0.82   6
   1   3 -15    3.03    0.64   6
   1   5 -14   55.96    0.83   6
   1   6 -13  116.67    0.96   6
   2   3 -12   87.44    0.74   6
  -2   7 -18    1.07    0.62   6
  -2  12 -10    1.21    0.79   6
  -2  12  -7  207.45    1.00   6
  -1  10 -13    7.28    0.80   6
   2   5  -9   53.06    0.63   6
   2   5  -8    7.28    0.43   6
  -4  14  -9   46.98    0.79   6
  -3  10 -17    1.59    0.57   6
  -3  12 -14   11.81    0.70   6
  -1  11  -8  561.91    1.46   6
   0   6 -16    1.19    0.72   6
   0   8 -14   -0.10    0.76   6
   0   9 -12   34.75    0.86   6
   1   4 -15   10.28    0.73   6
   1   7 -12    3.61    0.74   6
   2   5 -10   76.92    0.73   6
  -4  13 -14    4.75    0.61   6
  -3  13 -11    8.32    0.71   6
  -3  13  -6    7.60    0.63   6
  -2  11 -14    7.14    0.63   6
  -1   7 -17    8.95    0.69   6
  -1  11  -7  119.91    0.88   6
   2   2 -13   69.14    0.67   6
   2   4 -12    9.01    0.63   6
  -3  11 -16   13.84    0.52   6
  -2   9 -17   47.93    0.74   6
  -1   5 -18    9.62    0.62   6
  -1  11 -11   29.48    0.85   6
   1   8  -9    0.89    0.57   6
   2   3 -13  263.69    1.02   6
   2   5 -11    6.01    0.66   6
   2   5  -6  136.75    0.60   6
  -3  13 -12   25.32    0.73   6
  -2  10 -16    2.10    0.63   6
  -1  10 -14    2.58    0.72   6
   0   9 -13   28.10    0.84   6
   1   5 -15  103.81    0.94   6
   1   7 -13   20.78    0.81   6
   1   8 -10  244.78    1.04   6
  -2   8 -18    8.57    0.59   6
   1   8 -11    0.89    0.74   6
   2   4 -13   77.18    0.79   6
   2   6  -9   33.52    0.64   6
  -3  12 -15    0.20    0.56   6
  -2  11 -15   16.03    0.68   6
  -1   6 -18   63.18    0.73   6
  -1  10  -3   23.16    0.43   6
  -1  11 -12   26.13    0.71   6
   0   7 -16   31.19    0.81   6
   0   8 -15   29.52    0.84   6
   1   3 -16   54.00    0.74   6
   2   6 -10   87.09    0.79   6
  -5  15 -10   19.20    0.58   6
  -2  12 -13    2.36    0.71   6
  -1   9 -16    4.96    0.69   6
   0  10 -11   64.50    0.91   6
   1   8 -12    4.87    0.75   6
   2   2 -14   60.38    0.71   6
  -1  10 -15   15.27    0.73   6
   0   6 -17   73.35    0.85   6
   1   4 -16   10.32    0.67   6
   1   6 -15   42.69    0.83   6
   1   7 -14   53.84    0.92   6
   2   3 -14  197.37    0.95   6
  -1  11 -13   37.63    0.72   6
   0  10 -12   62.86    0.90   6
   2   6  -6   73.89    0.54   6
   3   1  -9  361.35    0.84   6
   3   2  -9  184.90    0.70   6
   3   2  -8  697.38    1.14   6
  -2  10 -17   10.28    0.57   6
   1   8 -13    7.19    0.79   6
   2   4 -14  267.12    1.10   6
   2   6 -12  130.04    0.96   6
   3   1 -10  153.44    0.64   6
   3   2 -10   18.55    0.48   6
  -3  13 -14   -0.74    0.57   6
  -2  12 -14   10.92    0.66   6
  -2  13 -10   14.93    0.72   6
  -2  13  -8    5.56    0.67   6
   2   7  -9  188.09    0.97   6
  -2  11 -16   33.70    0.62   6
  -1  12 -10   46.84    0.86   6
  -1  12  -9  172.87    1.02   6
   0   9 -15    6.26    0.72   6
   0  10 -13    4.81    0.74   6
   1   9 -11   57.93    0.86   6
   2   6  -5   59.42    0.51   6
   2   7 -10   13.65    0.62   6
   3   0 -10    7.22    0.32   6
   3   1 -11  318.80    0.89   6
   3   2 -11   75.48    0.63   6
   3   3  -7  153.50    0.63   6
  -3  14 -10    3.93    0.59   6
  -2  13 -11   32.69    0.74   6
  -2  13  -7   14.56    0.66   6
  -1   9 -17   45.95    0.72   6
   0   7 -17    4.22    0.66   6
   2   3 -15  102.85    0.87   6
   2   5 -14  154.51    0.99   6
   2   7 -11   76.04    0.86   6
   3   3 -11  381.84    1.09   6
   3   4  -9    7.43    0.55   6
  -3  14 -11    1.26    0.61   6
  -1  12  -7   55.35    0.78   6
   1   6 -16   20.65    0.73   6
   1   8 -14   26.97    0.80   6
   1   9 -12    4.96    0.80   6
   3   0 -11    5.37    0.39   6
  -2  12 -15   17.65    0.58   6
  -2  13 -12    7.07    0.65   6
  -2  13  -6  255.32    1.03   6
  -1   8 -18   18.59    0.60   6
  -1  12 -12   11.14    0.76   6
   0  10 -14    9.77    0.72   6
   0  11  -8   13.16    0.75   6
   1   4 -17   24.33    0.73   6
   2   4 -15    1.69    0.71   6
   2   7 -12    5.48    0.78   6
   3   1 -12  103.91    0.68   6
   3   3 -12   42.47    0.69   6
   3   4  -7    9.18    0.44   6
  -4  15 -10   25.31    0.61   6
  -3  14 -12   56.36    0.71   6
   0   6 -18    3.48    0.66   6
   0  11 -11    7.47    0.80   6
  -1  11 -15    5.00    0.63   6
   1   5 -17   42.45    0.72   6
   1   9 -13   50.43    0.86   6
   3   4 -12    5.56    0.67   6
   3   5 -10   20.05    0.70   6
   3   5  -8    5.25    0.54   6
  -1  12 -13   23.97    0.75   6
   0   8 -17   27.82    0.71   6
   0   9 -16   52.28    0.77   6
   0  11 -12   19.03    0.77   6
   1   7 -16   49.48    0.83   6
   1   8 -15  115.75    0.99   6
   1   9  -5   21.50    0.59   6
   2   5 -15  123.17    0.95   6
   2   7 -13   57.96    0.87   6
   2   8 -10  169.35    1.04   6
   2   8  -9    2.85    0.71   6
   2   8  -8  151.21    0.93   6
   3   2 -13    8.56    0.59   6
   3   5 -11   50.44    0.78   6
   1  10 -10    6.73    0.79   6
   1  10  -9    4.57    0.77   6
   2   8 -11    0.11    0.78   6
   3   1 -13  560.67    1.24   6
   3   3 -13  313.02    1.11   6
  -1  10 -17   10.01    0.57   6
  -1  12  -5    4.99    0.58   6
   0   7 -18   15.23    0.65   6
   0   9  -2    0.17    0.32   6
   0  10 -15   13.90    0.68   6
   0  11 -13   38.74    0.78   6
   1   6 -17   52.04    0.81   6
   1   8  -3   24.99    0.42   6
   2   3 -16    6.32    0.67   6
   2   8  -7    2.32    0.64   6
   3   4 -13    5.56    0.68   6
  -2  13 -14    3.97    0.58   6
   1  10  -7    7.21    0.70   6
   2   4 -16   98.06    0.83   6
   2   6 -15    0.28    0.73   6
   2   7 -14  134.22    1.03   6
   2   8 -12   13.25    0.81   6
   3   6  -9   31.44    0.69   6
  -1  11 -16    2.39    0.51   6
  -1  12 -14   30.65    0.62   6
   1  10 -12   13.74    0.77   6
   3   4  -5  342.21    0.81   6
  -1  13  -9   19.24    0.74   6
   2   5 -16    0.76    0.66   6
   3   2 -14   31.10    0.64   6
   3   3 -14   21.62    0.69   6
   3   6 -11   72.64    0.77   6
  -2  14 -10    1.77    0.59   6
  -2  14  -9   21.38    0.66   6
   0  11 -14   42.73    0.74   6
   2   8 -13   41.34    0.77   6
   3   4 -14  150.11    0.97   6
  -2  14 -11   53.77    0.72   6
   0  10 -16    6.33    0.62   6
   0  12 -10    3.62    0.75   6
   0  12  -8   61.57    0.84   6
   1   7 -17   15.55    0.67   6
   1   9 -15   37.14    0.68   6
   3   5  -5    2.69    0.41   6
   3   6 -12    5.07    0.68   6
  -2  14 -12    1.35    0.61   6
  -2  14  -7    0.42    0.67   6
  -1  12 -15   10.32    0.53   6
  -1  13 -12   59.60    0.74   6
  -1  13  -7    0.12    0.65   6
   1   5 -18   36.42    0.64   6
   2   9 -11   33.67    0.86   6
   3   6  -6   85.05    0.67   6
  -3  15 -10   12.12    0.54   6
   1  10  -5   94.86    0.77   6
   2   8 -14   40.92    0.82   6
   3   5 -14   18.66    0.78   6
   3   6 -13    0.96    0.84   6
   3   7 -10    6.44    0.64   6
   4   2  -9  403.54    1.02   6
   0  11 -15   28.07    0.64   6
   1   6 -18   99.84    0.78   6
   1  10 -14   69.31    0.75   6
   1  11 -10    1.52    0.82   6
   2   4 -17   13.26    0.69   6
   2   9 -12   54.88    0.79   6
   3   2 -15   16.75    0.68   6
   3   3 -15  102.66    0.87   6
   3   7 -11   51.17    0.76   6
   4   2 -10   47.59    0.60   6
   4   2  -8   15.51    0.44   6
   4   3 -10   39.91    0.65   6
   1  11 -11    2.05    0.77   6
   3   4 -15  139.55    0.93   6
   3   7 -12    1.63    0.77   6
   4   2 -11  120.50    0.76   6
   4   3  -8  199.30    0.82   6
   0  12 -13    7.83    0.67   6
   0  12  -6   16.34    0.66   6
   1   8 -17   42.97    0.67   6
   1   9 -16   24.59    0.69   6
   1  11 -12   53.78    0.83   6
   2   5 -17   62.33    0.77   6
   2   9 -13   37.91    0.84   6
   3   5  -4  160.76    0.65   6
   4   1 -11   18.76    0.52   6
   4   4  -9    8.85    0.61   6
   2   7 -16   15.08    0.69   6
   2   8 -15    1.85    0.75   6
   3   5 -15  162.18    1.06   6
   4   0 -10   24.31    0.44   6
   4   2 -12   15.58    0.59   6
   4   3 -12   38.57    0.73   6
   4   3  -7  118.10    0.62   6
   4   4  -8    0.41    0.48   6
   1   7 -18    1.76    0.53   6
   1  10 -15   79.98    0.77   6
   3   7 -13   50.08    0.85   6
   4   1 -12  181.64    0.84   6
   0  12 -14    0.52    0.57   6
   1  11 -13   12.92    0.72   6
   1  11  -6   77.55    0.89   6
   2   6 -17    1.90    0.64   6
   2   9 -14   28.22    0.78   6
   3   8 -11   18.99    0.81   6
   3   8 -10   27.65    0.73   6
   4   0 -11   95.75    0.61   6
   4   4 -12    1.61    0.70   6
   4   5 -10    5.27    0.71   6
   4   5  -9    1.47    0.64   6
   2   9  -5   12.09    0.63   6
   2  10 -11   11.29    0.69   6
   3   3 -16   11.94    0.71   6
   4   2 -13  244.67    1.05   6
   4   3  -6 1290.23    1.60   6
   4   5 -11   -0.38    0.74   6
   2  10 -12   10.90    0.79   6
   3   4 -16   15.18    0.65   6
   3   6  -4   49.76    0.54   6
   3   7 -14   24.87    0.85   6
   3   8 -12   16.41    0.80   6
  -1  14 -11   56.40    0.68   6
  -1  14  -9   10.00    0.66   6
   0  13 -10    9.06    0.62   6
   1  11 -14   72.35    0.77   6
   3   7  -5  262.14    0.92   6
   4   1 -13  146.19    0.82   6
   4   4 -13   61.74    0.82   6
   1   9  -2   66.85    0.54   6
   1  10 -16   25.62    0.61   6
   2   7 -17   33.07    0.68   6
   2   9 -15   40.16    0.75   6
   3   5 -16   13.59    0.67   6
   3   8 -13    1.51    0.77   6
   4   6 -10   25.82    0.77   6
  -2  15 -10   23.63    0.53   6
   0  13 -12    4.47    0.59   6
   1  12  -9    0.01    0.70   6
   2   5 -18    8.80    0.56   6
   4   2 -14   46.20    0.73   6
   4   3 -14  242.23    1.04   6
   4   3  -5  397.02    0.92   6
   4   5 -13   15.20    0.81   6
   4   6  -8    2.94    0.65   6
   3   9 -10    8.87    0.76   6
   4   4 -14    0.81    0.69   6
   4   6 -12    1.35    0.80   6
   1  11 -15   17.32    0.56   6
   2  10 -14   25.40    0.68   6
   3   6 -16   20.80    0.70   6
   3   8 -14    2.62    0.72   6
   3   9 -11   22.61    0.79   6
   3   9  -9    1.76    0.65   6
   1  12  -7   -0.03    0.69   6
   2   6 -18  108.31    0.73   6
   3   9 -12    8.02    0.74   6
   3   9  -8    4.71    0.65   6
   1  12 -13    5.64    0.60   6
   2   8 -17    1.02    0.53   6
   2  10  -5   37.08    0.71   6
   3   4 -17   34.85    0.69   6
   4   7 -11   10.85    0.78   6
   4   7 -10    9.84    0.67   6
   2  11 -12   61.86    0.79   6
   3   9 -13    3.43    0.71   6
   4   3 -15    2.41    0.63   6
   4   5  -5  198.08    0.79   6
   4   7  -8   25.17    0.75   6
   2  10 -15    5.51    0.56   6
   3   5 -17   51.40    0.69   6
   3   7 -16    1.78    0.63   6
   3   8 -15   28.02    0.74   6
   4   2 -15   10.15    0.64   6
   4   4 -15   50.46    0.78   6
   4   7 -12   22.36    0.72   6
   5   2 -10   27.42    0.64   6
   1  12 -14    0.19    0.55   6
   2   8  -2   64.41    0.53   6
   5   2 -11   19.09    0.64   6
   5   3 -11   38.06    0.73   6
   5   3 -10    9.45    0.58   6
   3   6 -17   30.46    0.67   6
   3   9 -14    1.90    0.67   6
   4   5 -15   21.99    0.73   6
   4   7 -13   -0.01    0.77   6
   3   7  -3    0.94    0.45   6
   3  10 -10    3.01    0.74   6
   4   8 -10    0.52    0.79   6
   5   1 -11   67.20    0.67   6
   5   1  -8    4.31    0.46   6
   5   2 -12    6.05    0.61   6
   5   3 -12   29.24    0.76   6
   5   4  -8   38.33    0.73   6
   0  14 -11    4.39    0.53   6
   0  14 -10    1.93    0.54   6
   1  13 -10    2.47    0.62   6
   2  11  -6    3.83    0.70   6
   4   8 -11    5.16    0.68   6
   5   4 -12   42.37    0.81   6
   5   5 -10   56.87    0.85   6
   1  13 -11    2.34    0.60   6
   2  11 -14   45.67    0.59   6
   3   9  -5  105.18    0.86   6
   3  10 -12    2.45    0.60   6
   4   3 -16   19.45    0.72   6
   4   4 -16    2.21    0.68   6
   4   7 -14   97.37    0.93   6
   4   8 -12    1.70    0.78   6
   5   0 -10    2.83    0.43   6
   5   0  -9  225.72    0.78   6
   5   1 -12   71.03    0.70   6
   5   5 -11  126.59    1.01   6
   5   5  -9   95.23    0.81   6
   0  14  -8    2.04    0.58   6
   1  13 -12   11.33    0.58   6
   1  13  -8   -0.06    0.63   6
   3   9 -15   21.90    0.65   6
   5   0 -11    5.48    0.51   6
   5   2 -13  184.92    0.97   6
   5   3 -13  176.07    1.00   6
   2  12 -10   18.62    0.73   6
   3  10 -13    2.92    0.56   6
   4   5 -16   42.60    0.71   6
   4   8 -13   52.38    0.85   6
   5   2  -6  457.17    1.04   6
   5   4 -13    7.09    0.75   6
   2  11  -5   17.72    0.72   6
   4   4  -3  151.55    0.62   6
   5   1 -13   29.92    0.63   6
   5   6 -11   30.35    0.82   6
   5   6 -10   98.04    0.96   6
   2   9  -2   11.75    0.48   6
   2  12 -12    6.70    0.61   6
   3   9  -4   55.70    0.75   6
   3  10 -14    8.98    0.58   6
   4   6 -16    0.14    0.64   6
   4   8 -14    1.77    0.69   6
   4   9 -11    4.70    0.76   6
   4   9 -10   15.83    0.71   6
   5   2 -14    3.22    0.62   6
   5   4 -14    3.85    0.72   6
   5   5  -6   26.94    0.67   6
   5   6 -12   64.63    0.91   6
   2  12 -13   24.44    0.60   6
   3  11 -10    0.29    0.75   6
   4   9 -12   17.76    0.75   6
   5  -1  -9  184.15    0.68   6
   3  11 -11   30.45    0.66   6
   5   5 -14    5.55    0.72   6
   5   7 -10   74.16    0.95   6
   3  10  -5   16.62    0.75   6
   4   9 -13    0.96    0.65   6
   5   7 -11   21.07    0.73   6
   2  12  -6    2.67    0.67   6
   4   5 -17    4.91    0.54   6
   4   7 -16    2.31    0.60   6
   4   8 -15    9.52    0.62   6
   5   3 -15   42.24    0.71   6
   5   4 -15    2.06    0.71   6
   5   6  -6  257.18    1.10   6
   5   7 -12   71.17    0.90   6
   3  11 -13    9.76    0.55   6
   5   6 -14   19.10    0.75   6
   4   4  -2  122.07    0.56   6
   5   5 -15   32.22    0.70   6
   5   7 -13   48.99    0.84   6
   6   2 -10  194.37    1.01   6
   6   2  -9  361.40    1.18   6
   6   3 -10   25.23    0.76   6
   1  14  -9    0.31    0.56   6
   4  10 -11   10.46    0.71   6
   4  10 -10    2.26    0.70   6
   6   2 -11    4.75    0.67   6
   6   3 -11   36.06    0.70   6
   2   9  -1    5.17    0.45   6
   2  10  -2    2.11    0.50   6
   2  12  -5    2.70    0.70   6
   2  13 -11    7.90    0.54   6
   2  13 -10   15.62    0.62   6
   2  13  -9    3.49    0.62   6
   3  11  -6   13.66    0.76   6
   4   8  -4    4.09    0.66   6
   5   8  -9    4.54    0.77   6
   6   1 -10  118.22    0.80   6
   6   1  -9  222.30    0.93   6
   6   2 -12  166.71    1.00   6
   6   3 -12   11.99    0.76   6
   6   4  -8   99.58    0.88   6
   5   6 -15    1.38    0.63   6
   5   8 -12    2.29    0.71   6
   6   1 -11    7.86    0.61   6
   3   7  -1    0.99    0.39   6
   4   9  -5    9.65    0.72   6
   6   1 -12    8.73    0.66   6
   3  12 -10    1.64    0.59   6
   4  10 -13   10.76    0.51   6
   5   8 -13   37.34    0.72   6
   5   8  -7   14.61    0.77   6
   6   0 -10  309.43    0.99   6
   6   0  -9    1.89    0.47   6
   6   2 -13    2.48    0.64   6
   6   3 -13   77.89    0.83   6
   6   4 -13    0.35    0.69   6
   2  13  -7    3.12    0.61   6
   5   7  -5  446.15    1.36   6
   5   4  -3    2.45    0.44   6
   6   5 -13  136.30    0.95   6
   5   8  -6   47.18    0.76   6
  -7  10 -15   38.85    0.77   7
  -5  10 -14   -0.38    0.80   7
  -4   9 -16   10.36    0.80   7
  -4  10 -11    5.37    0.85   7
  -4  10 -10  119.08    0.99   7
  -3   8 -17    0.96    0.75   7
   1   3 -18    4.60    0.72   7
   2   4  -8   15.90    0.43   7
  -3   9 -14   36.32    0.96   7
  -2   8 -15    2.65    0.87   7
   0   6  -6  330.18    0.86   7
   2   4 -13  109.88    0.95   7
   3   1 -15  125.38    0.91   7
   3   2 -13    7.04    0.67   7
  -5  10  -8  546.03    1.36   7
  -1   7  -6  108.02    0.58   7
   1   5  -7  714.65    1.22   7
  -6  10 -14   65.75    0.88   7
  -5  10 -13  248.44    1.22   7
  -4   9  -6  152.61    0.75   7
  -1   6 -17   19.83    0.88   7
  -1   7 -15    2.83    0.88   7
   2   3 -15  130.08    1.03   7
   3   2 -12    4.21    0.60   7
   3   2  -9  182.87    0.70   7
  -7  10 -14   44.22    0.89   7
  -5  10 -12   39.29    1.01   7
  -5  10  -9   50.25    0.85   7
  -3   7 -18   15.42    0.66   7
  -3   8  -5   10.60    0.39   7
  -2   8 -14    5.25    0.89   7
  -5  10 -11  154.13    1.07   7
  -5  10 -10   88.20    0.97   7
  -4   8 -17    3.91    0.77   7
  -3   6 -19    2.71    0.60   7
  -3   9  -9  224.69    1.06   7
   0   6 -14    5.00    0.86   7
   0   6  -7 1144.59    1.55   7
   3   1 -14   31.12    0.75   7
  -6  10 -13   10.23    0.83   7
  -6  10  -8   95.88    0.82   7
  -1   5 -18    8.43    0.85   7
  -1   7 -14   21.84    0.91   7
  -1   7  -7  135.44    0.71   7
   1   3 -17   27.78    0.93   7
   1   5 -13   72.44    0.85   7
   1   5  -8    0.49    0.42   7
   2   1 -17   65.04    0.90   7
  -7   9 -16    6.27    0.72   7
  -6   9 -16   14.87    0.77   7
  -2   7 -16   71.48    0.98   7
  -2   8 -13   22.10    0.91   7
  -1   4 -19   22.68    0.74   7
   2   3 -14  267.73    1.16   7
  -7  10 -13   48.06    0.86   7
  -6  10 -12   46.46    0.89   7
  -4   9  -7    9.99    0.57   7
  -1   7 -13    9.79    0.86   7
   1   5 -11    7.11    0.70   7
   1   5  -9    8.79    0.50   7
  -6  10 -11  144.28    1.01   7
  -6  10 -10    3.05    0.83   7
  -6  10  -9   28.44    0.73   7
  -5   8 -17    9.78    0.75   7
  -4   7 -18    4.34    0.71   7
  -3   8 -15    7.90    0.90   7
  -2   8 -12    8.55    0.75   7
  -2   8  -9   21.79    0.72   7
  -1   7  -8  178.28    0.84   7
  -7  10 -12    2.88    0.77   7
  -5   9  -6  327.32    0.93   7
  -4   6 -19   10.21    0.63   7
  -3   7 -17   55.11    0.82   7
  -3   8  -6  193.79    0.75   7
  -2   8 -11    5.78    0.71   7
  -2   8 -10   15.26    0.68   7
  -1   7 -12   57.81    0.92   7
   0   6  -9  163.72    0.84   7
  -7  10 -11    3.68    0.78   7
  -6   9 -15    2.44    0.88   7
  -4   9  -8  151.19    0.89   7
  -1   7 -11   91.20    0.92   7
   0   3 -18   54.14    0.95   7
  -8   9 -15    9.07    0.63   7
  -7  10 -10    3.66    0.74   7
  -5   9 -14   51.17    0.97   7
  -3   8 -14   65.36    1.04   7
  -2   6 -17   77.43    0.98   7
  -2   7 -15    8.09    0.80   7
   2   0 -17   38.51    0.78   7
   2   3 -12  105.69    0.85   7
   3   0 -14   54.98    0.73   7
   3   1 -12  102.97    0.72   7
  -7   9 -15   42.94    0.83   7
  -5   7 -18    7.88    0.68   7
  -4   9 -11   53.41    0.92   7
  -4   9 -10  103.75    0.94   7
  -4   9  -9    7.93    0.73   7
  -1   6 -15    3.07    0.79   7
   2   1 -16   11.21    0.74   7
   2   3  -9  513.05    1.07   7
   3   1 -11  412.99    1.05   7
  -3   5 -19    7.78    0.69   7
  -3   8  -7    7.24    0.51   7
   1   2 -17    5.44    0.79   7
   2   3 -10  111.96    0.69   7
  -6   9 -14    3.48    0.93   7
  -5   9 -13    0.68    0.88   7
  -5   9  -7   65.70    0.65   7
  -3   7 -16   46.12    0.95   7
  -3   8 -13   55.55    0.97   7
  -2   7 -14    3.57    0.92   7
   0   5 -14    5.76    0.88   7
   2   2 -14   75.18    0.85   7
  -8   9 -14   56.29    0.84   7
  -1   6 -14    2.83    0.89   7
   0   1 -19   -0.38    0.71   7
  -7   9 -14    6.36    0.78   7
  -5   9 -12    5.75    0.86   7
  -3   8 -12  107.79    1.06   7
  -3   8  -8    6.66    0.62   7
  -1   5 -16    5.78    0.89   7
   1   3 -15    3.04    0.85   7
   3   0 -13    4.80    0.59   7
  -5   9  -8   66.78    0.72   7
  -4   5 -19   12.98    0.65   7
  -3   8 -11   43.33    0.91   7
   0   2 -18   -0.22    0.88   7
   0   3 -17    1.25    0.84   7
  -7   8 -16  120.12    0.97   7
  -6   9 -13   -0.48    0.89   7
  -5   9 -11   11.76    0.86   7
  -5   9 -10  128.04    0.99   7
  -5   9  -9   17.47    0.74   7
  -4   8 -14  257.90    1.25   7
  -3   6 -17    0.43    0.85   7
  -1   6 -13    5.84    0.87   7
   2   0 -16   84.99    0.84   7
  -8   9 -13   52.75    0.89   7
  -6   9  -7  119.02    0.77   7
  -4   8  -6  368.45    0.93   7
  -2   7 -12  250.93    1.22   7
  -1   2 -19    7.18    0.77   7
  -1   6  -7  112.74    0.62   7
   1   1 -17   25.20    0.88   7
   1   2 -16    8.48    0.86   7
   3   0 -12   93.93    0.66   7
  -7   9 -13   35.44    0.87   7
  -6   9 -12   91.70    1.01   7
  -4   7 -16    5.55    0.78   7
  -3   4 -19    1.37    0.72   7
  -2   7  -8  292.09    0.96   7
   0   5 -12    4.75    0.66   7
   2   2 -12  214.32    0.93   7
  -7   7 -17  154.14    0.92   7
  -6   9  -8   43.89    0.74   7
  -5   6 -18    1.54    0.61   7
  -4   8 -13  105.08    1.01   7
  -2   7 -11  174.77    0.96   7
  -2   7  -9  278.88    1.04   7
  -1   5 -15    1.19    0.92   7
  -8   8 -15   97.92    0.93   7
  -8   9 -12    4.52    0.86   7
  -6   6 -18   42.80    0.77   7
  -6   8 -15    9.29    0.86   7
  -6   9 -11  104.92    1.02   7
  -1   6  -8   51.22    0.53   7
   2   2 -11  645.39    1.28   7
  -4   8  -7   11.13    0.52   7
   0   3 -16    7.32    0.91   7
   2   2 -10  467.83    1.05   7
  -9   8 -14    5.58    0.68   7
  -5   7 -16    7.22    0.93   7
   0   4 -14   15.46    0.89   7
   1   3 -13  170.02    1.01   7
   2   0 -15    6.35    0.77   7
  -4   4 -19    8.93    0.69   7
  -3   7 -13  325.87    1.36   7
  -2   5 -16    1.24    0.96   7
  -1   4 -16   13.05    0.97   7
  -1   5 -14   10.31    0.92   7
   1   0 -17    4.63    0.82   7
  -4   8  -9   55.32    0.77   7
  -3   7  -6  166.27    0.67   7
   2   1 -13  463.93    1.22   7
  -8   7 -16   96.32    0.84   7
  -8   8 -14    2.46    0.88   7
  -5   8  -6  597.15    1.11   7
  -3   3 -19   41.17    0.81   7
  -2   2 -19    0.82    0.74   7
   0   4 -13    8.59    0.82   7
  -7   7 -16   18.95    0.80   7
  -7   8 -14    8.35    0.86   7
  -3   4 -18   27.47    0.85   7
  -2   6 -13    2.34    0.84   7
  -5   7 -15   73.38    1.08   7
  -5   8 -12  121.03    1.06   7
  -4   7 -14  111.96    1.00   7
  -3   7  -7  194.50    0.75   7
   0   0 -18   10.92    0.84   7
  -6   6 -17   14.80    0.82   7
  -5   8  -7   70.03    0.66   7
  -3   7 -11  656.67    1.57   7
  -1   4 -15    8.58    0.90   7
   0   4 -12  286.03    1.12   7
   2   1 -12    0.59    0.56   7
   3  -1 -11  235.60    0.77   7
  -6   5 -18    5.19    0.62   7
  -2   6 -12   43.34    0.77   7
   0   1 -17   -0.11    0.82   7
   0   2 -16    1.59    0.87   7
   2  -1 -15  336.89    1.12   7
  -7   8 -13   64.38    0.97   7
  -5   8  -8  877.45    1.52   7
  -4   3 -19   25.45    0.67   7
  -1   5 -12  129.87    0.88   7
  -8   7 -15  145.46    1.01   7
  -6   8 -12    3.44    0.88   7
  -5   8  -9   85.08    0.82   7
  -3   6 -14  163.44    1.07   7
  -2   1 -19  102.48    0.91   7
  -1   1 -18   22.85    0.95   7
  -5   7 -14   22.52    0.88   7
  -4   6 -15    9.48    0.93   7
  -2   6 -10    4.54    0.65   7
  -2   6  -8  158.77    0.74   7
  -7   8 -12   11.54    0.89   7
  -6   8 -11  161.67    1.08   7
  -3   3 -18    3.10    0.87   7
  -2   5 -14    8.87    0.78   7
  -2   6  -9   10.23    0.52   7
  -9   7 -14    2.41    0.69   7
  -8   6 -16   71.30    0.86   7
  -6   6 -16  218.19    1.26   7
  -6   8  -7  773.91    1.37   7
  -5   5 -17    0.59    0.87   7
  -4   2 -19    3.56    0.70   7
   2  -1 -14  192.78    0.91   7
  -8   7 -14    4.68    0.87   7
  -8   8 -11    6.19    0.84   7
  -6   8  -9    7.83    0.67   7
  -6   8  -8  383.59    1.10   7
  -4   5 -16   12.06    0.97   7
   0  -2 -18   37.14    0.75   7
  -7   7 -14   48.37    0.97   7
  -5   6 -15  114.73    1.13   7
  -4   6 -14  354.77    1.45   7
  -4   7  -7   36.48    0.55   7
  -2   5 -13   83.84    0.86   7
  -1   3 -15    3.70    0.92   7
  -1   4 -13   11.25    0.82   7
   1  -1 -16    3.57    0.73   7
   2   0 -12  922.48    1.47   7
  -7   8 -10   12.14    0.82   7
  -3   6 -12  253.68    1.10   7
  -2   4 -15   28.24    0.85   7
  -7   8  -8    7.13    0.69   7
  -6   7 -13    1.67    0.93   7
  -2  -1 -19  155.50    0.93   7
  -2   1 -18    0.85    0.83   7
  -6   6 -15   23.55    1.06   7
  -5   5 -16    4.47    0.92   7
  -4   1 -19   35.51    0.78   7
  -3   3 -17  130.22    1.11   7
  -2   5 -12  282.60    1.18   7
  -8   6 -15   55.89    0.91   7
  -8   7 -13   20.64    0.95   7
  -7   6 -15  103.66    1.06   7
  -7   7 -13    5.33    0.92   7
  -5   3 -18   22.62    0.81   7
  -3   0 -19   14.81    0.73   7
  -3   5 -14    3.45    0.90   7
  -1   4 -12   14.01    0.64   7
   0  -1 -17   77.58    0.92   7
   2  -1 -13  231.05    0.89   7
   2   0 -11  644.03    1.17   7
  -8   5 -16   19.22    0.83   7
  -6   3 -18    4.66    0.69   7
  -5   6 -14   55.55    1.08   7
  -3   6 -10   11.74    0.69   7
  -2  -2 -19    6.14    0.69   7
   1  -2 -16   76.50    0.83   7
  -9   7 -12   16.76    0.88   7
  -6   5 -16   50.74    1.04   7
  -6   7 -12    4.49    0.92   7
  -5   7  -6   10.21    0.45   7
  -1   3 -14   21.47    0.78   7
   0   0 -16   11.32    0.88   7
   0   1 -15    5.14    0.81   7
  -9   6 -14   34.14    0.80   7
  -3   6  -9    3.90    0.51   7
   0   3 -10   16.45    0.54   7
   1   0 -14   80.44    0.82   7
  -5   7  -9   25.25    0.70   7
  -5   7  -7   93.31    0.62   7
  -4   4 -16  164.54    1.19   7
  -3  -1 -19   13.24    0.69   7
  -3   4 -15  131.26    1.15   7
  -3   5 -13  102.79    1.02   7
  -2   0 -18   74.67    0.91   7
  -2   5 -10   90.48    0.72   7
  -1  -2 -18  132.16    1.02   7
  -1   0 -17    5.31    0.95   7
   0  -2 -17   52.72    0.89   7
  -9   5 -15   50.57    0.75   7
  -8   7 -12    2.16    0.82   7
  -5   7  -8   82.63    0.70   7
  -4   3 -17   14.43    0.80   7
  -2   3 -15    6.96    0.89   7
  -1   4 -10  148.81    0.79   7
   2  -1 -12   15.92    0.53   7
  -9   7 -11  181.12    1.09   7
  -8   6 -14    9.28    0.86   7
  -7   6 -14   92.45    1.10   7
  -5   5 -15    2.30    0.82   7
  -5   6 -13  282.45    1.25   7
  -4   5 -14  157.88    1.15   7
  -3   3 -16    2.59    0.93   7
  -2   4 -13    3.27    0.79   7
  -2   5  -9    9.55    0.47   7
  -1   3 -13    3.37    0.77   7
  -4   6 -11   72.49    0.89   7
  -3   2 -17   44.26    0.89   7
  -1  -3 -18    8.39    0.73   7
   2  -2 -13   89.45    0.72   7
  -8   5 -15   66.65    0.90   7
  -7   7 -11   39.69    0.91   7
  -6   5 -15   41.67    1.03   7
  -6   7 -10    6.30    0.76   7
  -5   3 -17   21.57    0.90   7
  -5   4 -16   36.61    0.97   7
  -3   5 -12    0.39    0.78   7
  -2  -1 -18    1.55    0.79   7
   0  -3 -17  181.01    1.03   7
   0  -1 -16    5.44    0.78   7
   0   1 -14  233.84    1.10   7
   1   0 -13    4.15    0.63   7
  -9   6 -13    4.35    0.81   7
  -6   7  -6   75.28    0.57   7
   1  -2 -15   22.76    0.78   7
   2  -1 -11  314.16    0.86   7
  -7   3 -17   21.66    0.70   7
  -6   3 -17   13.78    0.86   7
  -6   7  -9  193.32    0.95   7
  -6   7  -7  494.87    1.12   7
  -4   6 -10   56.83    0.79   7
  -3   4 -14   10.45    0.78   7
  -2   4 -12   39.37    0.78   7
  -1  -1 -17   15.90    0.86   7
   1  -1 -14   49.97    0.75   7
  -8   6 -13    1.93    0.89   7
  -7   4 -16  179.90    1.07   7
  -7   6 -13  162.10    1.19   7
  -6   7  -8   18.75    0.59   7
  -5   1 -18    5.05    0.76   7
  -5   5 -14   18.49    0.97   7
  -4   2 -17   80.13    1.01   7
  -4   5 -13   76.96    1.01   7
  -2   3 -14  207.55    1.16   7
   1   1 -10   13.35    0.44   7
  -9   5 -14    4.68    0.73   7
  -6   1 -18    4.20    0.66   7
  -4   3 -16   33.39    0.97   7
  -3   5 -11 1233.47    1.86   7
  -2  -2 -18   57.17    0.83   7
  -2   0 -17   51.30    0.95   7
 -10   5 -13   11.21    0.65   7
  -9   4 -15   12.87    0.70   7
  -7   7  -9    2.58    0.69   7
  -4   6  -7  163.50    0.69   7
  -3   1 -17   44.19    0.98   7
  -3   3 -15  211.59    1.22   7
   2  -2 -12   16.77    0.53   7
  -9   6 -12  116.56    0.93   7
  -8   7  -9  197.11    0.98   7
  -7   7  -8  214.52    0.92   7
  -7   7  -7   31.09    0.61   7
  -6   5 -14   30.66    1.06   7
  -5   4 -15  123.59    1.12   7
  -4   0 -18    2.93    0.80   7
  -3   2 -16   38.26    0.97   7
  -2   4 -11   13.23    0.67   7
  -1  -2 -17    6.52    0.85   7
   0  -2 -16   37.66    0.82   7
   1  -3 -15    2.53    0.71   7
  -8   5 -14    0.72    0.84   7
  -7   2 -17   53.75    0.80   7
  -5   2 -17   62.46    0.86   7
  -5   3 -16    4.11    0.90   7
  -3   4 -13    0.91    0.70   7
[truncated: 773,546 more chars]
