# Supplementary material
Source: MDPI journal article supplement (https://www.mdpi.com/2073-4352/11/2/185)
Supplement: s1 [file s1 › crystals-1107729/Supporting Material revised.docx]

Heteroleptic [Cu(P^P)(N^N)][PF6] Complexes: Effects of Isomer Switching from 2,2'-biquinoline to 1,1'-biisoquinoline

Nina Arnosti, Marco Meyer[
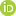
](https://orcid.org/0000-0003-4862-6371), Alessandro Prescimone[
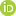
](https://orcid.org/0000-0002-3631-5210), Edwin C. Constable[
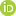
](https://orcid.org/0000-0003-4916-4041) and Catherine E. Housecroft *[
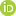
](https://orcid.org/0000-0002-8074-0089)

Department of Chemistry, University of Basel, BPR 1096, Mattenstrasse 24a, CH-4058 Basel, Switzerland; nina.arnosti@unibas.ch (N.A.); marco.meyer@unibas.ch (M.M.); alessandro.prescimone@unibas.ch (A.P.); edwin.constable@unibas.ch (E.C.C.)

***** Correspondence: catherine.housecroft@unibas.ch; Tel: +41 61 207 1008

**Figure 1.** Electrospray mass spectrum (positive mode) of [Cu(POP)(biq)][PF6].

**Figure 2.** Electrospray mass spectrum (positive mode) of [Cu(xantphos)(biq)][PF6].


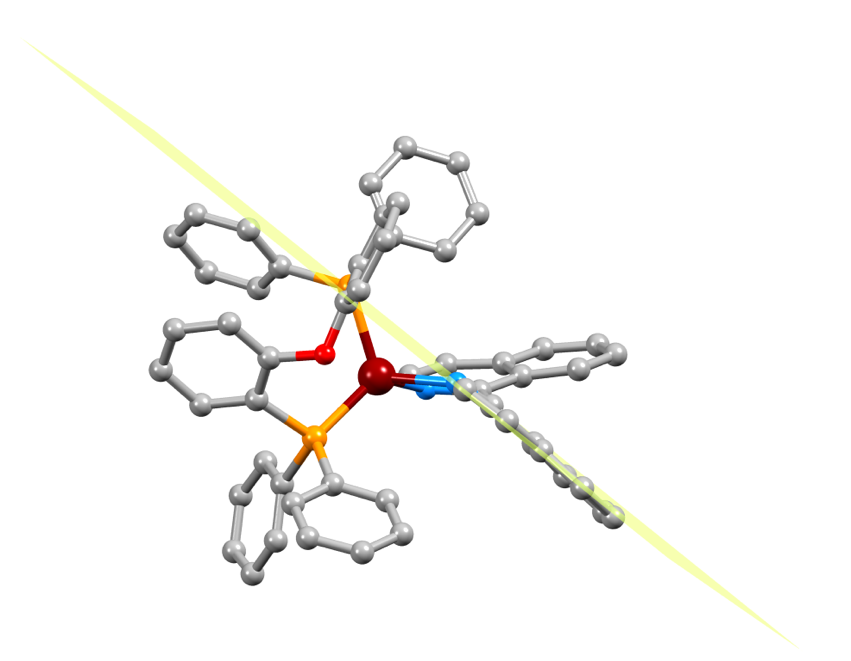


**Figure 3.** Structure of the [Cu(POP)(biq)]+ cation highlighting the relationship between one of the Cu–N bond vectors and the plane of the corresponding NC5-ring in one isoquinoline unit. H atoms are omitted.


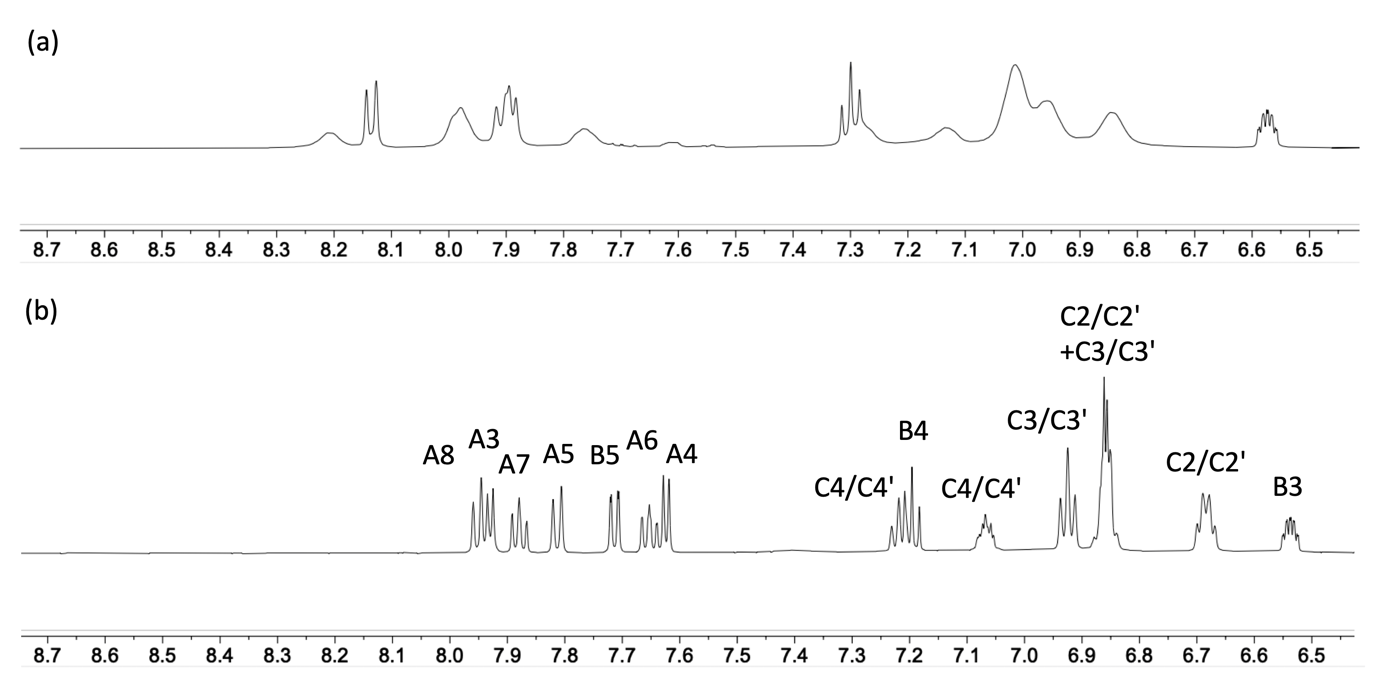


**Figure 4.** 1H NMR spectra (aromatic region) of [Cu(xantphos)(biq)][PF6] in (a) acetone-d6 (500 MHz, 298 K) and (b) C2D2Cl4 (600 MHz, 298 K). See Scheme 2 for atom labels.


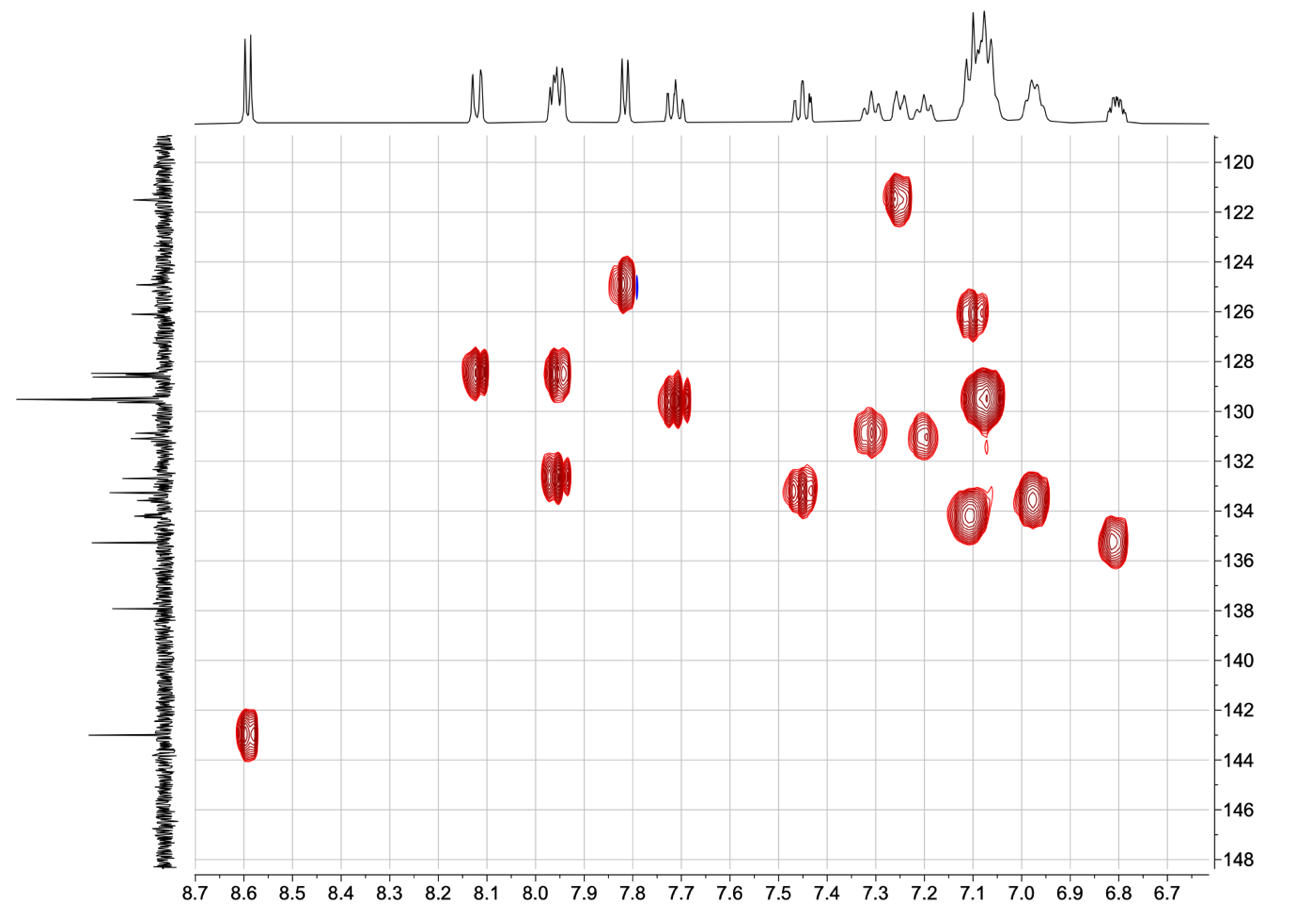


**Figure 5.** HMQC spectrum of [Cu(POP)(biq)][PF6] (acetone-d6, 500 MHz for 1H, 126 MHz for 13C, 298 K).


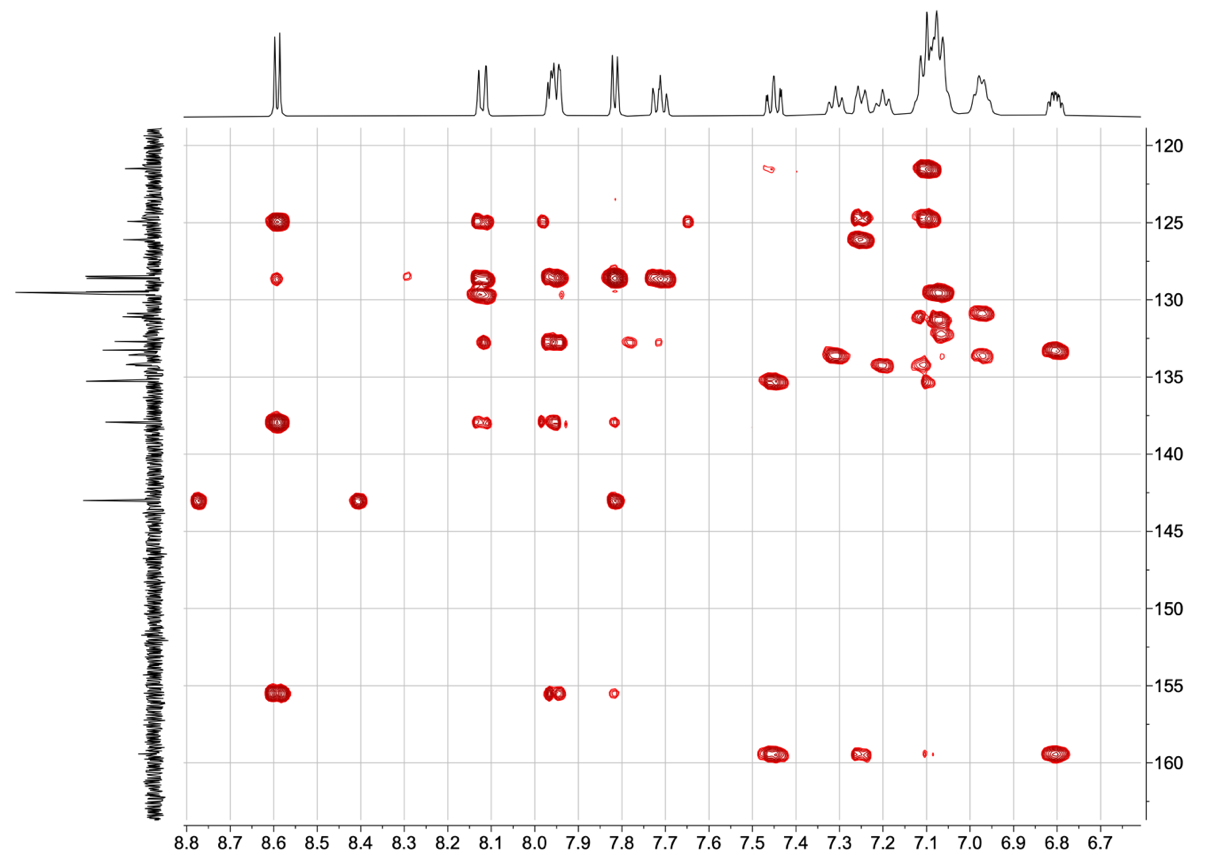


**Figure 6.** HMBC spectrum of [Cu(POP)(biq)][PF6] (acetone-d6, 500 MHz for 1H, 126 MHz for 13C, 298 K).


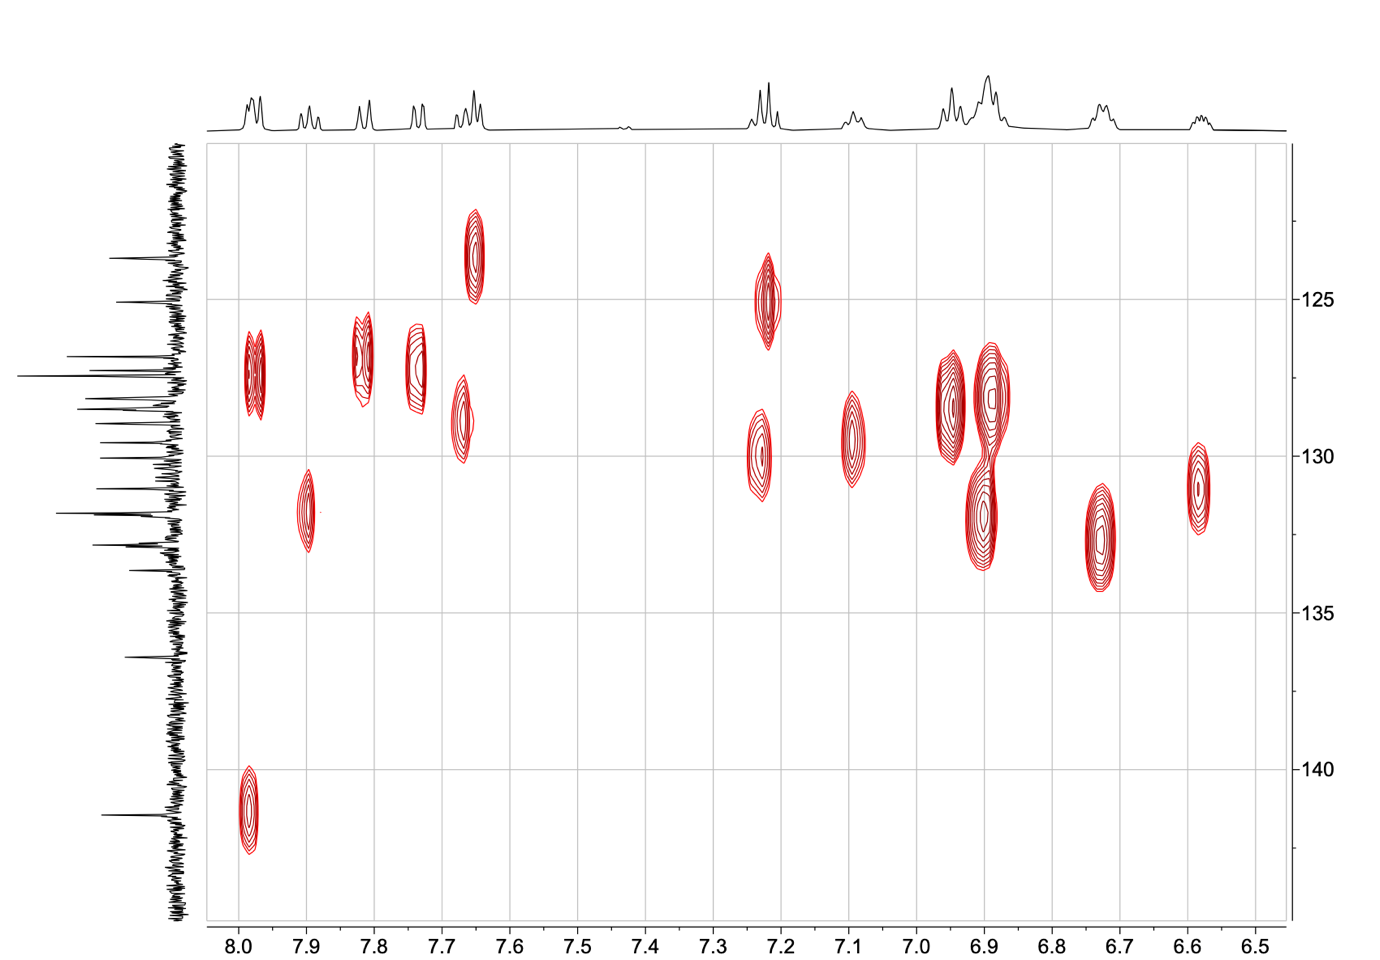


**Figure 7.** HMQC spectrum (aromatic region) of [Cu(xantphos)(biq)][PF6] (C2D2Cl4, 600 MHz, 328 K).


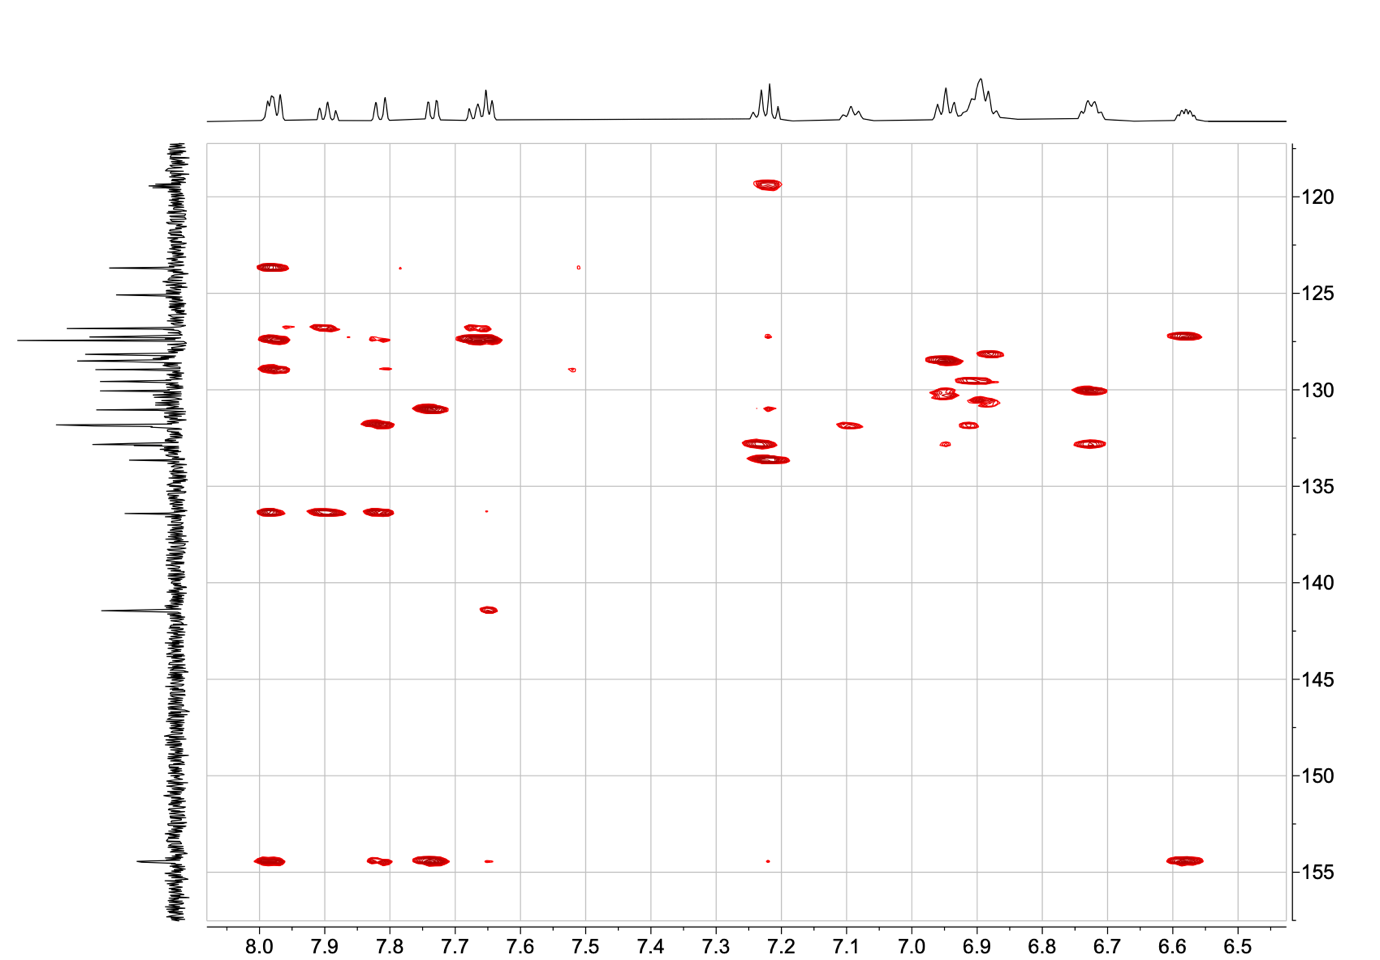


**Figure 8.** HMBC spectrum (aromatic region) of [Cu(xantphos)(biq)][PF6] (C2D2Cl4, 600 MHz for 1H and 151 MHz for 13C, 328 K).


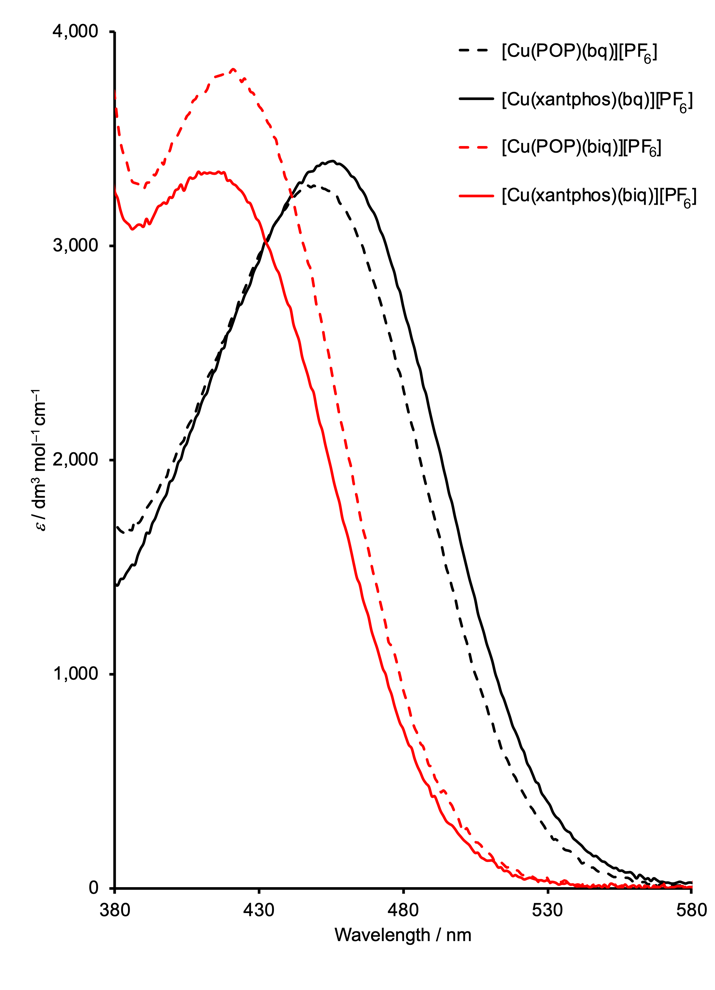


**Figure 9.** Expansion of the MLCT region in the solution absorption spectra of [Cu(POP)(bq)][PF6] and [Cu(xantphos)(bq)][PF6] compared to their biq analogs (CH2Cl2, 2.5 x 10­–5 mol dm–3).

**Table 1.** Cartesian coordinates for the DFT modelled structure of [Cu(xantphos)(bq)]+.

Cu -1.242000 -1.002000 1.221000

N -2.138000 -2.572000 2.331000

C -1.473000 -2.858000 3.395000

C -3.603000 -4.340000 2.565000

C -1.670000 -4.169000 3.960000

C -3.186000 -3.172000 1.954000

C -2.803000 -4.893000 3.552000

C -0.793000 -4.828000 4.863000

H -3.714000 -2.769000 1.097000

H -3.992000 -6.693000 3.792000

H -4.493000 -4.843000 2.205000

C -1.080000 -6.087000 5.398000

H 0.151000 -4.365000 5.140000

H -0.385000 -6.551000 6.093000

C -2.246000 -6.743000 5.031000

H -2.477000 -7.722000 5.442000

C -3.101000 -6.153000 4.104000

N -0.005000 -1.024000 2.995000

C -0.472000 -1.836000 3.875000

C 1.628000 -0.175000 4.381000

C -0.075000 -1.618000 5.242000

C 1.021000 -0.299000 3.146000

C 1.042000 -0.795000 5.474000

C -0.740000 -2.117000 6.392000

H 1.371000 0.262000 2.285000

H 2.407000 0.041000 6.939000

H 2.493000 0.471000 4.488000

C -0.265000 -1.891000 7.687000

H -1.668000 -2.676000 6.285000

H -0.800000 -2.300000 8.540000

C 0.884000 -1.136000 7.878000

H 1.261000 -0.956000 8.880000

C 1.530000 -0.582000 6.776000

P -2.486000 1.052000 1.019000

P -0.046000 -1.711000 -0.747000

C -3.541000 1.314000 2.574000

C -5.055000 1.730000 4.885000

C -3.008000 1.008000 3.827000

C -4.829000 1.850000 2.482000

C -5.585000 2.053000 3.637000

C -3.765000 1.209000 4.980000

H -2.000000 0.614000 3.913000

H -5.249000 2.117000 1.517000

H -6.588000 2.464000 3.563000

H -3.345000 0.958000 5.950000

H -5.644000 1.885000 5.785000

C -3.619000 0.926000 -0.484000

C -5.347000 0.721000 -2.667000

C -3.452000 1.764000 -1.588000

C -4.650000 -0.017000 -0.478000

C -5.514000 -0.118000 -1.567000

C -4.316000 1.659000 -2.678000

H -2.654000 2.499000 -1.613000

H -4.788000 -0.667000 0.382000

H -6.315000 -0.852000 -1.559000

H -4.182000 2.308000 -3.539000

H -6.016000 0.638000 -3.519000

C 0.637000 -3.461000 -0.485000

C 1.660000 -6.030000 -0.095000

C 0.706000 -4.359000 -1.555000

C 1.099000 -3.847000 0.773000

C 1.603000 -5.132000 0.970000

C 1.215000 -5.642000 -1.358000

H 0.364000 -4.066000 -2.544000

H 1.062000 -3.155000 1.609000

H 1.944000 -5.432000 1.958000

H 1.261000 -6.342000 -2.188000

H 2.050000 -7.032000 0.062000

C -1.254000 -1.746000 -2.195000

C -3.054000 -1.878000 -4.323000

C -1.074000 -0.929000 -3.311000

C -2.338000 -2.628000 -2.144000

C -3.235000 -2.695000 -3.208000

C -1.975000 -0.996000 -4.374000

H -0.239000 -0.237000 -3.366000

H -2.478000 -3.269000 -1.277000

H -4.077000 -3.380000 -3.166000

H -1.838000 -0.355000 -5.241000

H -3.756000 -1.925000 -5.151000

C -1.321000 2.535000 0.850000

C 0.453000 4.667000 0.576000

C -1.604000 3.750000 1.468000

C -0.155000 2.402000 0.092000

C 0.769000 3.442000 -0.037000

C -0.720000 4.817000 1.322000

H -2.506000 3.877000 2.060000

H -0.943000 5.770000 1.796000

H 1.112000 5.526000 0.482000

C 1.405000 -0.554000 -1.111000

C 3.499000 1.216000 -1.606000

C 1.242000 0.819000 -0.914000

C 2.626000 -1.043000 -1.567000

C 3.668000 -0.156000 -1.823000

C 2.283000 1.728000 -1.123000

H 2.774000 -2.107000 -1.729000

H 4.621000 -0.533000 -2.189000

H 4.336000 1.874000 -1.825000

O -0.010000 1.203000 -0.538000

C 2.055000 3.219000 -0.843000

C 3.263000 3.785000 -0.055000

H 4.206000 3.677000 -0.600000

H 3.379000 3.276000 0.910000

H 3.163000 4.857000 0.148000

C 1.928000 3.959000 -2.189000

H 2.828000 3.838000 -2.803000

H 1.773000 5.035000 -2.046000

H 1.080000 3.582000 -2.775000
